# Supplementary material for: Comparative Transcriptional Profiling of Three Super-Hybrid Rice Combinations
Source: MDPI journal article supplement (doi:10.3390/ijms15033799), 2014-03-03

## Supplementary Information

**Figure S1.** Venn diagram of expressed genes detected in each hybrid combinations. **A–C** represent *LY2163*, *LY2186* and *LYP9* combinations respectively at Fw stage; **D–F** represent *LY2163*, *LY2186* and *LYP9* combinations respectively at Fi stage. *SE21s*, and *PA64s* are sterile line. *MH63*, *MH86* and *93-11* are restorer line. Percentage refers to number of shared genes in expressed genes in each hybrid combination at different developmental stage.

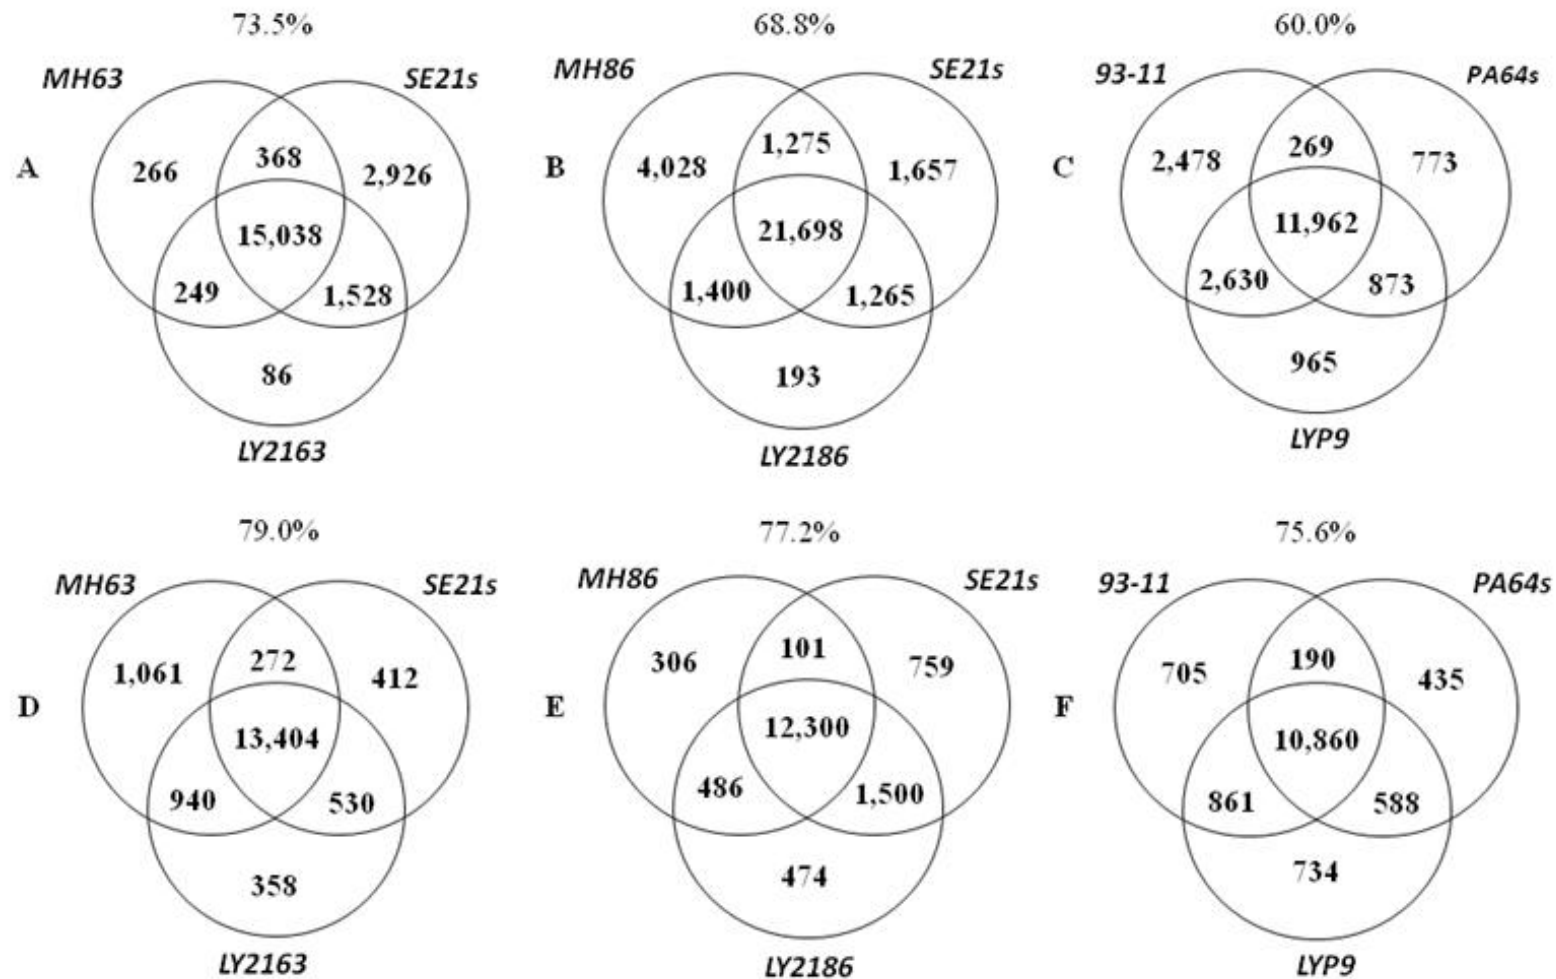

**Figure S2.** DGs involved in photosynthesis pathway. DGs clustered by MADIBA [33]. Coloured enzyme numbers indicate related genes clustered by MADIBA. ■, in cluster, annotated by any two annotations of KEGG, PRIAM and TIGR.

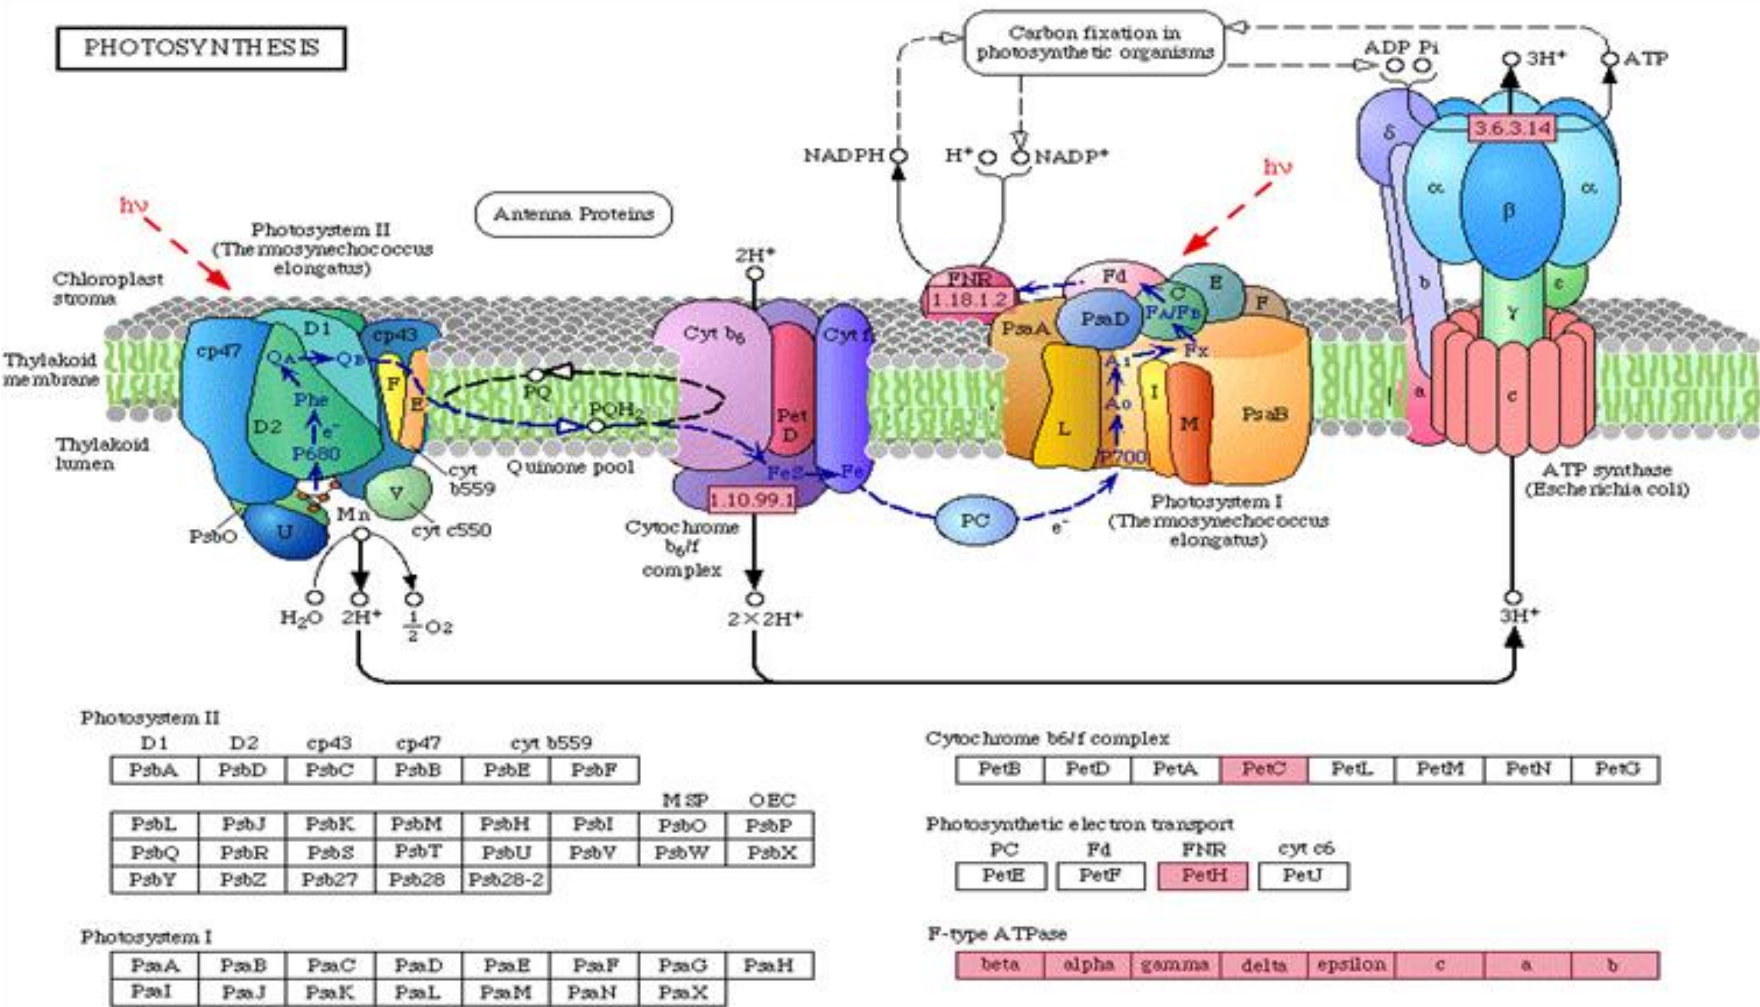

**Figure S3.** DGs involved in carbon fixation pathway. DGs clustered by MADIBA [33]. Coloured enzyme numbers indicate related genes clustered by MADIBA. ■, in genome but not present in cluster; ■, in cluster, annotated by all annotations; ■, in cluster, annotated by any two annotations of KEGG, PRIAM and TIGR; ■, in cluster, annotated by PRIAM only; ■ refers to DGs shared by *LY2163*, *LY2186* and *LYP9* hybrid combinations.

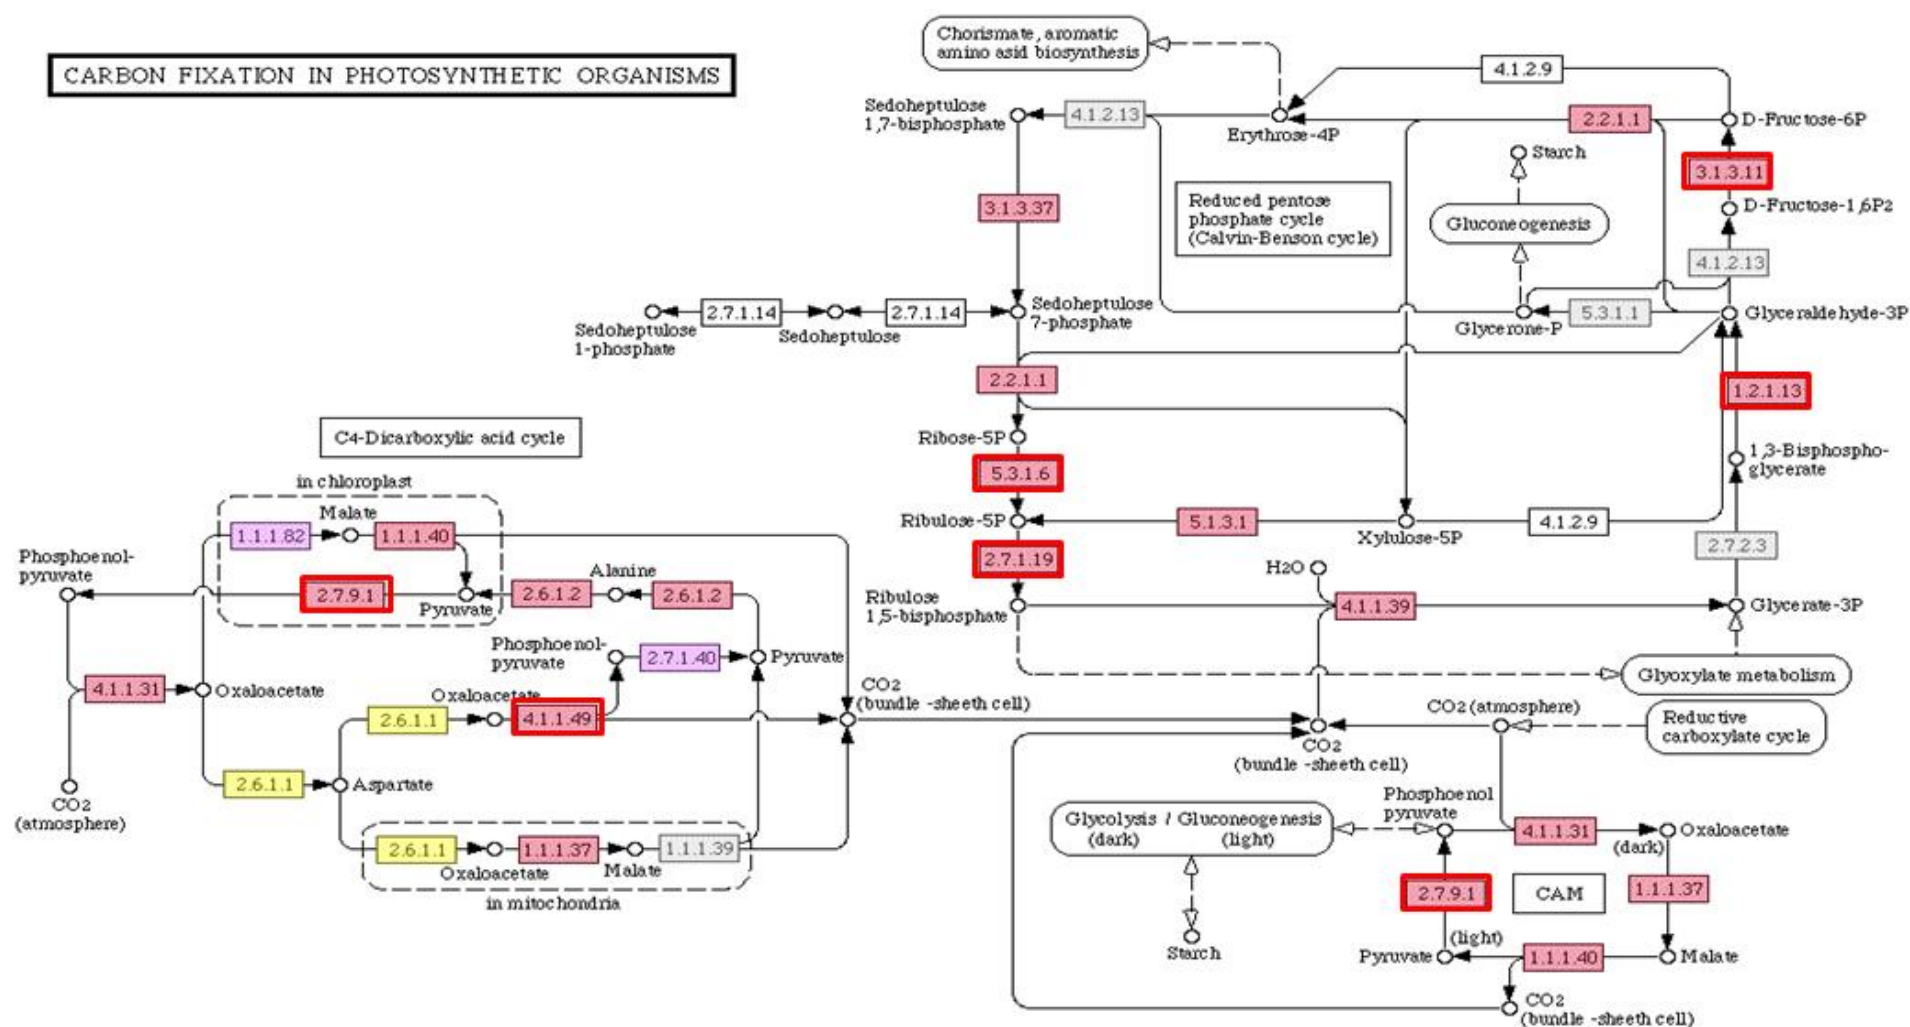

**Figure S4.** DGs involved in starch and sucrose pathway. DGs clustered by MADIBA [33]. Coloured enzyme numbers indicate related genes clustered by MADIBA. ■, in genome but not present in cluster; ■, in cluster, annotated by any two annotations of KEGG, PRIAM and TIGR; ■, in cluster, annotated by KEGG only; ■, in cluster, annotated by PRIAM only. □ refers to DGs shared by *LY2163*, *LY2186* and *LYP9* hybrid combination.

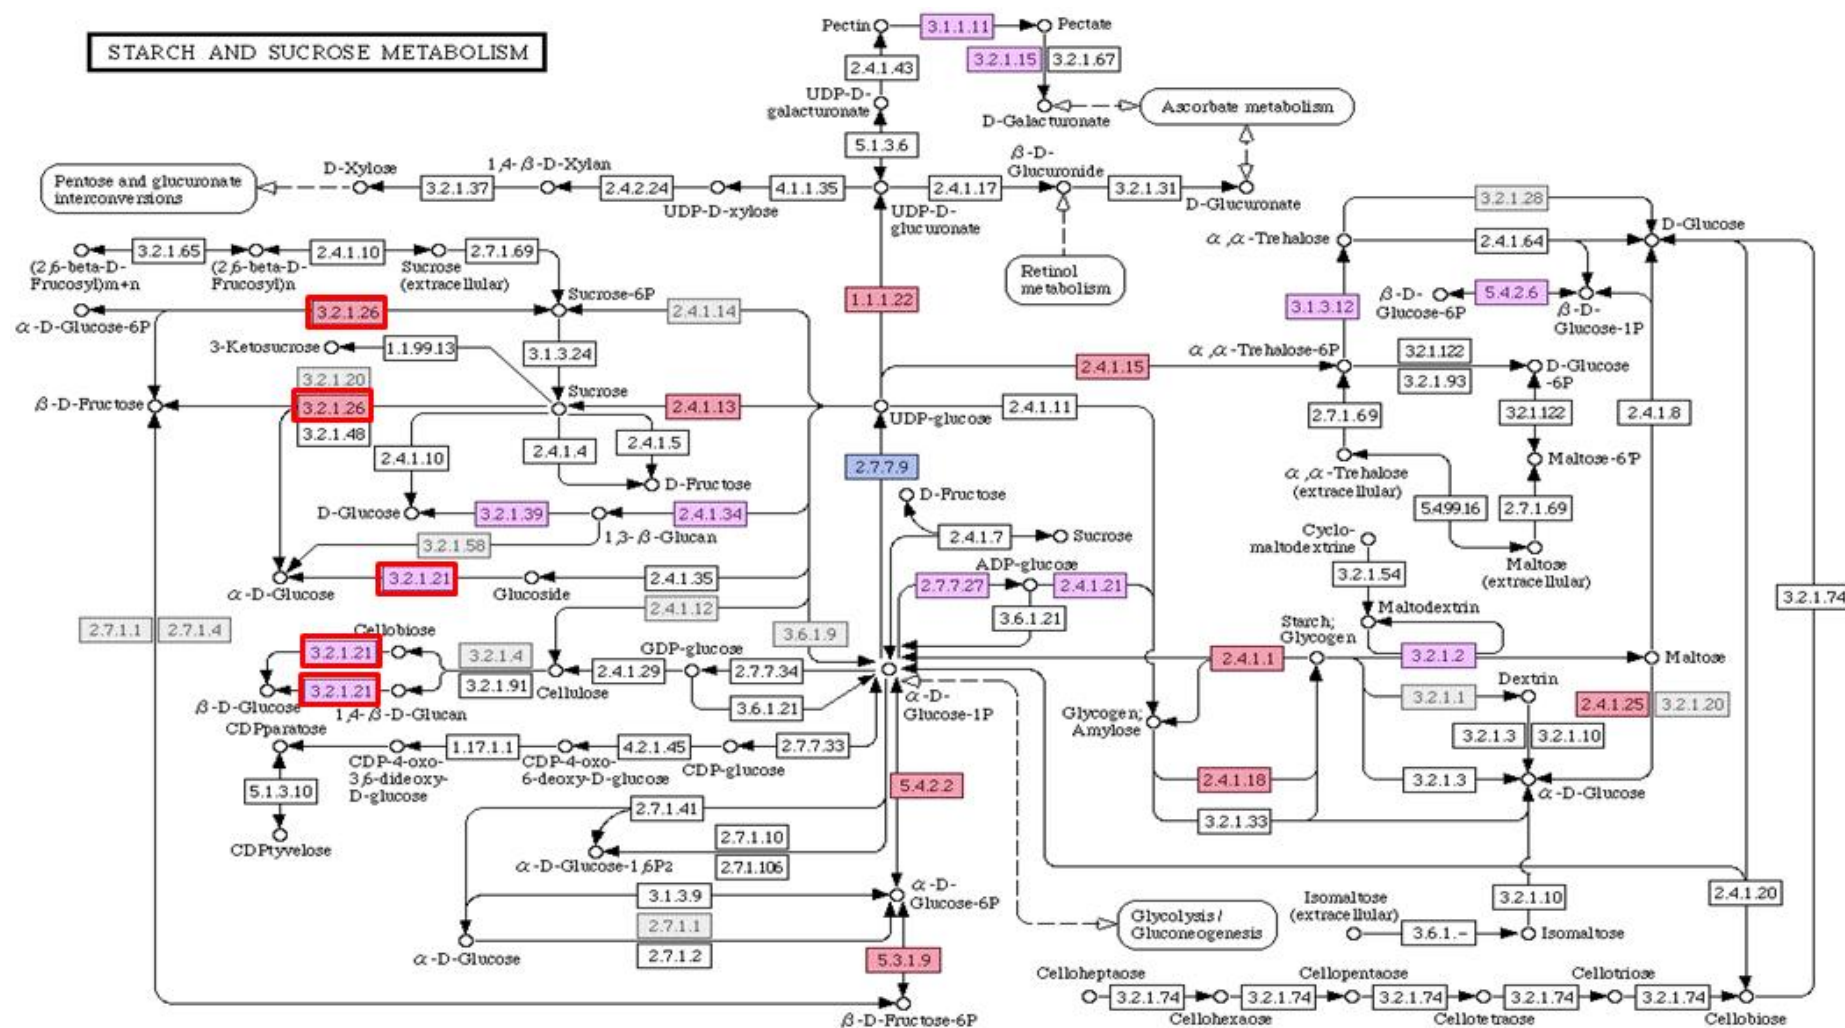

Supplement: s1 [file s1]
