# Supplementary material for: Comparative Transcriptional Profiling of Three Super-Hybrid Rice Combinations
Source: MDPI journal article supplement (doi:10.3390/ijms15033799), 2014-03-03
Supplement: s2 [file s2]

## Sheet: Table S1
Table S1. Number of Genes Detected Expression
Develemental stage	LY2163 hybrid combination			LY2186 hybrid combination			LYP9 hybrid combination
	SE21s	LY2163	MH63	SE21s	LY2186	MH86	PA64s	LYP9	93-11
Fw	19,860 / 53.8%	16,901 / 45.8%	15,921 / 43.1%	25,895 / 70.1%	24,556 / 66.5%	28,401 / 76.9%	13,877 / 37.6%	16,430 / 44.5%	17,339/47.0%
Fi	14,618 / 39.6%	15,232 / 41.3%	15,677 / 42.5%	14,660 / 39.7%	14,760 / 40.0%	13,193 / 35.7%	12,073 / 32.7%	13,043 / 35.3%	12,616/34.2%
The percentage refers to expressed genes/total genes (36,926)

## Sheet: Table S2
Table S2. OLIGO and its intensity.
Gene ID	Fw-SE21s_3		Fw-LY2163		Fw-MH63		Fw-SE21_8		Fw-LY2186		Fw-MH86		Fw-PA64s		Fw-LYP9		Fw-93-11		Fill-SE21s_3		Fi-LY2163		Fi-MH63		Fi-SE21s_8		Fi-LY2186		Fi-MH86		Fi-PA64s		Fi-LYP9		Fi-93-11		MSU 6.1	Annotation
Os000002_01	A	50.6164	A	53.2096	A	45.7773	P	289.07	P	268.884	P	245.729	P	293.024	P	377.937	P	342.512	A	93.4732	A	98.5625	P	141.011	A	30.62	A	43.0068	A	53.9271	A	93.1612	P	109.049	A	123.579	LOC_Os07g07820.1	expressed protein
Os000005_01	P	7208.13	P	5341.65	P	1904.07	P	1076.94	P	1428.53	P	1617.26	P	1559.7	P	1247.41	P	983.216	P	219.462	P	268.707	P	267.194	P	869.628	P	731.272	P	560.596	P	221.172	P	276.113	P	386.437	LOC_Os09g28200.1	HSF-type DNA-binding domain containing protein, expressed
Os000006_01	A	58.63	A	59.0688	A	46.5489	P	237.696	A	144.937	A	57.41	A	55.7124	A	88.0648	P	126.468	A	39.4421	A	50.6165	A	59.7195	A	18.2966	A	25.7019	A	24.1884	A	72.289	A	89.9567	A	95.6455	LOC_Os02g29140.1	ankyrin, putative, expressed
Os000007_01	P	272.993	P	360.526	P	433.328	P	311.256	P	274.912	P	154.758	P	209.04	P	251.102	P	286.733	P	342.523	P	347.019	P	335.336	P	203.091	P	220.034	P	226.383	P	279.575	P	308.597	P	340.798	LOC_Os02g56540.1	kinesin motor domain containing protein, putative, expressed
Os000008_01	P	138.516	A	102.59	A	69.2112	P	311.418	P	277.376	P	219.326	P	264.071	P	278.047	P	224.554	P	143.012	P	139.471	A	153.94	A	77.4971	A	115.169	P	175.082	P	159.885	P	137.222	A	130.809	LOC_Os01g01920.1	HD domain containing protein 2, putative, expressed
Os000009_01	P	4179.03	P	4771.76	P	6003.12	P	3824.3	P	2916.38	P	2320.9	P	2043.41	P	2599.07	P	3364.59	P	10276.2	P	8538.71	P	6838.74	P	5600.19	P	6770.64	P	7233.72	P	4628.61	P	6178.32	P	7684.95	LOC_Os08g21660.1	WD domain, G-beta repeat domain containing protein, expressed
Os000010_01	A	60.5802	A	53.468	A	68.96	P	184.803	P	235.847	P	127.644	P	124.383	P	151.963	A	120.35	A	43.6609	A	33.8829	A	46.8236	A	18.0609	A	25.8361	A	25.5749	A	47.9144	A	75.9815	A	66.2259	LOC_Os03g52794.1	phosphatidylinositol kinase, putative, expressed
Os000011_01	A	83.4363	A	75.8088	A	60.6028	P	372.802	P	465.599	P	547.055	P	159.535	P	199.59	P	207.766	P	141.556	P	184.941	P	233.807	P	162.981	A	113.064	A	146.935	P	142.459	A	116.846	A	125.215	-	-
Os000012_01	P	368.62	P	2292.68	P	2939.77	P	7250.19	P	11206.7	P	9940.99	P	3585.58	P	6764.33	P	3070.11	P	788.551	P	625.735	P	1044.32	P	957.39	P	604.86	P	856.87	P	877.734	P	919.989	P	1213.59	LOC_Os02g45180.1	ORM1, putative, expressed
Os000013_01	P	308.623	P	245.501	P	178.325	P	364.192	P	314.074	P	405.255	P	394.464	P	364.636	P	463.386	P	205.83	P	265.082	P	311.263	P	180.905	P	198.34	P	215.907	P	179.598	P	224.078	P	270.507	LOC_Os03g14980.2	lissencephaly type-1-like homology motif, putative, expressed
Os000014_01	A	60.7871	A	46.2609	A	60.5466	P	214.416	A	295.206	A	208.131	A	140.926	P	145.532	P	172.612	A	94.8599	P	123.279	A	103.53	A	21.726	A	32.0106	A	45.0595	A	90.8259	P	99.0879	A	99.7474	LOC_Os03g62750.1	inner membrane protein, putative, expressed
Os000015_01	A	71.4841	A	70.8421	A	80.9645	P	299.535	P	255.498	P	310.935	P	293.321	P	342.086	P	254.7	P	152.44	P	190.005	P	230.107	P	133.011	P	192.34	A	127.189	A	143.071	P	165.31	P	209.501	LOC_Os05g06814.1	expressed protein
Os000018_01	P	173.639	P	187.878	P	205.442	P	377.277	P	330.607	A	162.154	P	360.192	P	335.482	P	291.29	P	248.395	P	212.642	P	134.591	P	222.108	P	182.828	A	82.8277	P	175.48	P	159.837	P	197.203	LOC_Os01g55720.1	expressed protein
Os000020_01	A	73.9613	A	75.5436	A	53.2294	A	232.267	A	312.728	A	208.369	A	113.048	P	170.648	P	169.399	A	75.9897	A	77.5804	A	98.8718	A	22.3253	A	41.7022	A	54.4738	A	72.9569	A	90.0868	P	126.929	LOC_Os03g02970.1	Dicer, putative, expressed
Os000023_01	A	89.0603	A	81.0807	A	72.4547	P	228.67	P	219.387	P	151.859	P	208.845	P	179.481	P	185.362	A	63.6792	A	82.5402	A	91.3646	A	6.1529	A	30.2044	A	29.5042	P	135.59	P	135.351	A	135.079	LOC_Os02g15980.1	expressed protein
Os000026_01	A	138.941	A	104.967	A	108.293	P	253.089	P	233.169	P	151.422	P	179.928	P	199.57	P	204.586	A	70.6007	A	63.6353	A	74.5172	A	35.0749	A	40.6761	A	38.0799	A	51.6935	A	71.8461	A	81.5384	LOC_Os09g24590.1	expressed protein
Os000030_01	A	79.8433	A	80.2857	A	54.2632	P	228.172	P	242.892	P	130.333	A	105.097	P	165.692	P	140.319	A	43.2505	A	72.9489	A	77.9438	A	38.4378	A	48.8426	A	98.3381	A	67.6966	A	83.6846	A	81.1348	LOC_Os03g33580.2	mitotic checkpoint protein, putative, expressed
Os000035_02	A	102.386	A	90.4841	A	79.1556	P	245.238	P	214.551	A	139.338	P	192.302	P	186.635	P	186.095	A	217.506	P	187.557	P	163.873	A	63.4105	A	68.2595	A	71.698	P	194.796	P	149.09	P	185.337	LOC_Os08g09610.1	expressed protein
Os000037_01	P	1104.18	P	1375.1	P	1709.3	P	1664.89	P	1102.98	P	1220.85	P	1588.72	P	1499.53	P	1473.77	P	3684.41	P	3648.57	P	3906.23	P	2741.67	P	2315.87	P	2486.35	P	2683.25	P	2874.76	P	1902.86	LOC_Os04g42520.1	phosphoribosyl transferase, putative, expressed
Os000038_01	P	743.987	P	688.946	P	634.082	P	1268.22	P	1110.47	A	1073.16	P	1634.48	P	1718.26	P	998.039	P	871.749	P	997.285	P	1106.09	P	1159.97	P	1005.97	P	681.94	P	883.51	P	663.878	P	779.936	-	-
Os000040_01	P	2399.87	P	1949.9	P	1787.48	P	1034.45	P	889.471	P	551.108	P	1349.92	P	967.668	P	929.258	P	1762.62	P	1978.04	P	2983.27	P	1585.45	P	1411.12	P	1951.52	P	1797.66	P	1996.06	P	1873.95	LOC_Os01g65440.1	universal stress protein domain containing protein, putative, expressed
Os000041_01	P	445.128	P	432.175	P	631.101	P	1634.49	P	991.884	P	849.624	P	679.054	P	1569.86	P	1285.94	P	782.077	P	978.114	P	1150.01	P	1935.34	P	1483.11	P	1112.21	P	530.749	P	878.067	P	1389.78	LOC_Os10g38700.1	glutathione S-transferase, putative, expressed
Os000043_01	P	861.231	P	607.471	P	331.099	P	469.324	P	267.015	P	442.099	P	616.605	P	1790.67	P	597.207	P	160.857	P	386.815	P	247.919	P	160.818	P	335.013	P	791.351	P	231.009	P	249.843	P	258.026	LOC_Os10g39150.1	expressed protein
Os000044_01	P	154.005	A	127.209	A	75.0622	P	346.704	P	317.455	A	595.81	P	282.577	P	303.521	P	240.497	P	167.081	P	164.136	P	197.95	A	117.178	P	190.217	A	97.1579	P	214.816	P	208.547	P	199.935	LOC_Os03g21890.1	potassium transporter, putative, expressed
Os000046_01	P	325.92	P	338.346	P	228.034	P	472.728	P	617.654	P	370.17	P	326.602	P	257.15	P	387.851	P	306.04	P	295.767	P	322.844	P	283.999	P	183.761	P	149.168	P	212.758	P	191.02	P	290.609	LOC_Os01g51154.3	single myb histone, putative, expressed
Os000047_01	A	62.8393	A	70.5961	A	57.3393	P	238.924	P	213.797	P	150.77	P	159.744	A	125.199	P	141.118	A	79.442	A	89.957	P	120.605	A	102.596	A	103.166	A	98.5833	P	144.534	A	96.5846	A	84.9318	-	-
Os000050_01	P	339.534	P	289.249	P	265.563	P	321.114	P	301.893	P	170.235	P	270.75	P	273.172	P	263.238	P	136.803	P	144.622	P	156.812	P	127.612	P	168.101	A	137.796	P	183.84	P	195.498	P	212.659	LOC_Os01g28030.1	peroxidase precursor, putative, expressed
Os000051_01	P	216.441	P	161.098	P	117.726	P	509.05	P	523.658	P	760.209	P	495.206	P	536.936	P	376.858	P	404.503	P	598.492	P	609.258	P	331.426	P	420.847	P	462.584	P	278.32	P	305.545	P	340.347	LOC_Os03g56300.1	4Fe-4S binding domain containing protein, expressed
Os000053_01	P	641.732	P	542.686	P	510.959	P	821.921	P	733.998	P	576.108	P	603.369	P	613.678	P	933.165	P	707.072	P	665.879	P	579.456	P	588.422	P	626.256	P	641.804	P	478.756	P	491.656	P	614.329	LOC_Os03g55290.1	GASR3 - Gibberellin-regulated GASA/GAST/Snakin family protein precursor, expressed
Os000054_01	A	66.9214	A	72.8637	A	62.8445	P	324.973	P	313.625	P	285.372	P	270.778	P	332	P	391.258	P	171.381	P	243.28	P	262.607	P	189.979	P	218.944	P	359.616	P	187.362	P	234.499	P	263.519	LOC_Os06g45300.2	serine/threonine-protein kinase HT1, putative, expressed
Os000056_01	A	57.1726	A	50.6098	A	68.3561	P	312.296	P	310.49	P	229.008	P	197.134	P	171.685	P	154.699	P	142.848	A	121.988	P	175.729	A	61.4293	A	95.0967	P	169.172	A	106.801	A	112.768	A	95.6781	LOC_Os11g16390.3	expressed protein
Os000060_01	P	431.562	P	376.858	P	179.375	P	337.122	P	328.954	P	320.68	P	398.407	P	299.98	P	354.797	P	164.442	P	205.069	P	286	P	165.417	P	190.565	P	173.339	P	185.766	P	192.516	A	120.486	LOC_Os02g42700.1	thioredoxin, putative, expressed
Os000062_01	P	541.918	P	441.289	P	373.438	P	1347.78	P	1285.27	A	1431.17	P	1658.79	P	1187.81	P	1434.95	P	856.15	P	834.955	P	1219.43	P	634.19	P	648.251	P	473.04	P	324.987	P	234.324	P	560.776	LOC_Os01g55570.1	expressed protein
Os000063_01	P	13664.3	P	10211.9	P	6439.42	P	6004.45	P	4318.83	P	4142.57	P	15408.2	P	11783.5	P	8908.96	P	14577.5	P	13622	P	13569	P	5990.46	P	7563.48	P	9280.69	P	5290.9	P	5979.79	P	6601.54	LOC_Os05g08770.2	uncharacterized protein At4g06744 precursor, putative, expressed
Os000065_01	P	193.671	P	200.785	P	234.404	P	423.317	P	336.964	A	217.121	P	277.04	P	284.715	P	271.263	P	303.843	P	357.327	P	346.553	P	238.021	P	227.672	P	260.833	P	229.768	P	259.01	P	277.707	LOC_Os08g02094.1	GDSL-like lipase/acylhydrolase, putative, expressed
Os000066_01	A	54.6394	A	100.613	A	102.257	P	286.041	P	236.092	P	299.756	P	243.976	P	247.947	P	224.697	P	152.264	A	158.569	A	176.589	A	84.5912	A	109.442	A	128.514	P	175.463	P	163.168	A	120.194	LOC_Os12g19350.1	expressed protein
Os000067_01	P	204.544	P	214.553	P	218.949	P	1767.88	P	1815.51	P	2157.33	P	1060.22	P	1155.98	P	1120.92	P	1666.54	P	1763.81	P	1609.29	P	1231.27	P	1347.14	P	1102.72	P	538.592	P	476.535	P	538.419	-	-
Os000069_01	P	369.149	P	319.534	P	259.077	P	389.894	P	378.127	P	319.174	P	375.247	P	348.628	P	316.102	P	387.48	P	431.209	P	436.302	P	291.303	P	310.131	P	260.351	P	366.368	P	386.516	P	369.909	LOC_Os02g34410.1	U-box domain-containing protein, putative, expressed
Os000070_01	P	256.291	P	241.159	P	186.833	P	299.975	P	448.233	P	423.687	P	269.884	P	354.986	P	415.916	A	135.649	P	235.2	P	198.345	P	238.74	P	205.165	A	169.943	P	217.368	P	206.715	A	102.575	LOC_Os04g33750.1	ribosomal protein, putative, expressed
Os000072_01	P	832.379	P	938.932	P	1260.69	P	1028.48	P	742.228	P	712.37	P	360.823	P	619.793	P	710.647	P	1525.71	P	1645.9	P	1521.67	P	964.127	P	1001.22	P	1289.61	P	1224.53	P	1530.37	P	1556.84	LOC_Os06g04800.1	peptidase, T1 family, putative, expressed
Os000073_01	P	735.631	P	759.134	P	756.338	P	990.599	P	1587.27	P	685.213	P	1216.77	P	586.775	P	1104.12	P	1093.73	P	1248.92	P	1303.39	P	1487.4	P	1283.17	P	893.504	P	686.289	P	908.397	P	1344.8	LOC_Os07g43570.1	TKL_IRAK_DUF26-lc.25 - DUF26 kinases have homology to DUF26 containing loci, expressed
Os000074_01	P	876.966	P	1194.01	P	1365.47	P	1707.94	P	1552.81	P	1105	P	866.756	P	866.209	P	1044.32	P	1836.9	P	1813.97	P	1772.1	P	1440.23	P	1281.57	P	1246.72	P	1341.52	P	1649.34	P	1888.07	LOC_Os04g31610.1	OsFBO3 - F-box and other domain containing protein, expressed
Os000076_01	P	212.616	P	177.565	A	122.09	P	467.236	P	494.771	P	604.043	P	460.261	P	395.665	P	317.504	P	172.923	P	249.878	P	312.229	P	189.17	P	198.975	P	241.675	P	314.736	P	247.015	P	185.75	LOC_Os04g53440.1	RNA recognition motif containing protein, putative, expressed
Os000078_01	A	83.5651	A	104.738	A	76.218	P	393.479	P	395.2	P	394.682	P	302.466	P	332.869	P	404.375	P	210.671	P	205.374	P	232.964	P	229.406	P	221.139	P	263.758	P	172.058	P	219.743	P	226.25	-	-
Os000079_01	A	49.3859	A	48.8071	A	53.7046	P	250.785	P	283.961	A	78.7402	A	95.989	A	97.3408	A	133.982	A	48.4787	A	46.1991	A	61.1736	A	5.06069	A	11.3951	A	10.2676	A	378.68	A	201.203	A	63.3033	LOC_Os02g05680.1	apoptosis-inducing factor 2, putative, expressed
Os000080_01	P	9073.02	P	11690.8	P	14594.6	P	11129.9	P	8779.95	P	6485.03	P	11119.9	P	10730.4	P	10155.7	P	37840.7	P	33363.4	P	29730.1	P	14395.9	P	15708.6	P	16791.7	P	20102.6	P	22306.7	P	25258.9	LOC_Os02g33680.1	U-box domain containing protein, expressed
Os000081_01	A	83.6051	A	68.429	A	95.0059	P	433.637	P	472.552	P	534.196	P	453.09	P	455.446	P	285.714	P	270.547	P	392.616	P	418.705	P	206.526	P	217.02	P	330.156	P	182.917	P	252.005	P	255.442	LOC_Os01g51200.1	CK1_CaseinKinase_1.3 - CK1 includes the casein kinase 1 kinases, expressed
Os000082_01	P	1323.38	P	951.804	P	374.856	P	291.915	P	235.506	P	139.658	P	685.136	P	458.983	P	253.898	A	54.0774	A	63.6492	A	57.2893	A	57.3215	A	58.7809	A	30.8294	A	92.7118	A	81.2233	A	90.1647	LOC_Os10g41370.1	WD repeat-containing protein 8, putative, expressed
Os000083_01	P	534.964	P	420.065	P	317.98	P	536.512	P	464.665	P	425.07	P	516.802	P	639.55	P	592.192	P	311.606	P	378.27	P	393.97	P	445.465	P	425.368	P	429.333	P	238.421	P	297.256	P	383.872	LOC_Os02g02510.1	DNA-directed RNA polymerase II subunit RPB4, putative, expressed
Os000084_01	A	58.088	A	67.0368	A	53.6653	P	189.528	P	189.283	A	170.137	A	76.3079	A	105.031	P	164.086	A	46.6029	A	50.7781	A	81.9598	A	9.654	A	34.1017	A	49.2982	A	57.7549	A	71.3073	A	74.1409	LOC_Os01g34610.2	expressed protein
Os000085_01	A	107.415	A	112.146	A	110.959	P	1036.89	P	1215.15	P	967.099	P	1886.08	P	1543.52	P	1426.74	P	865.418	P	862.649	P	1115.31	P	843.423	P	721.495	P	545.079	P	426.845	P	569.838	P	535.857	LOC_Os03g12990.1	phytosulfokines precursor, putative, expressed
Os000086_01	A	83.4722	A	70.578	A	72.6522	P	368.106	P	342.756	A	1170.54	P	394.239	P	426.563	P	265.406	P	212.554	P	243.445	P	301.22	P	170.186	P	182.692	A	151.778	P	171.123	P	173.781	P	183.499	LOC_Os01g35184.2	CAMK_KIN1/SNF1/Nim1_like.10 - CAMK includes calcium/calmodulin depedent protein kinases, expressed
Os000087_01	A	61.0029	A	69.5667	A	61.5313	P	194.114	P	186.203	A	116.653	A	89.8927	P	118.715	P	135.065	A	35.1058	A	43.4802	A	46.5364	A	23.7094	A	24.9728	A	24.6348	A	78.4305	A	75.9104	A	87.1623	LOC_Os01g51670.1	expressed protein
Os000089_01	A	132.466	P	186.683	P	155.248	P	532.239	P	608.469	P	548.09	P	620.274	P	733.893	P	600.538	P	259.91	P	381.212	P	431.662	P	586.181	P	398.293	P	405.715	P	217.399	P	285.527	P	296.918	LOC_Os12g32380.1	40S ribosomal protein S29, putative, expressed
Os000096_01	A	90.0878	A	61.235	A	61.9534	P	173.313	A	157.125	A	142.748	A	183.339	A	142.574	P	147.102	A	72.6851	A	75.1608	A	85.2778	A	6.23932	A	37.833	A	68.869	A	94.2953	A	23.7435	A	121.978	LOC_Os11g24824.1	expressed protein
Os000100_01	A	65.0189	A	88.06	A	64.405	P	582.434	P	488.413	P	246.987	P	297.282	P	366.258	P	364.168	P	197.555	P	197.822	P	140.956	P	256.822	P	195.603	P	192.386	P	226.145	P	226.139	P	188.095	LOC_Os08g01920.1	SGR2, putative, expressed
Os000101_01	A	59.3678	A	49.434	A	62.2663	P	220.041	P	244.14	P	132.61	A	148.056	P	164.413	P	179.864	A	110.44	A	101.796	A	83.3178	A	29.5671	A	44.0396	A	59.6528	P	221.156	A	150.569	A	100.336	LOC_Os06g37620.1	protein kinase family protein, putative, expressed
Os000102_01	A	43.3564	A	35.4344	A	64.6972	P	235.707	P	229.929	A	76.2438	A	71.7947	A	81.2213	A	94.9017	A	47.6883	A	37.9188	A	51.1578	A	11.8766	A	26.9691	A	24.9068	A	56.8489	A	-19.3255	A	80.179	LOC_Os03g05520.1	nicotiana lesion-inducing like, putative, expressed
Os000103_01	P	475.68	P	299.207	P	171.117	P	486.482	P	470.431	P	358.384	P	414.618	P	383.122	P	430.226	P	314.284	P	393.225	P	382.37	P	294.639	P	392.458	P	593.772	P	243.617	P	320.503	P	344.392	LOC_Os04g51950.1	serine/threonine-protein kinase HT1, putative, expressed
Os000106_01	P	203.217	A	153.917	A	82.7557	P	143.505	P	183.965	A	215.532	P	239.853	P	231.189	A	175.913	A	50.8146	A	55.0635	A	56.8793	A	83.9912	A	61.8564	A	40.021	A	72.1016	A	63.3519	A	102.134	LOC_Os06g04560.1	kinesin motor domain containing protein, expressed
Os000107_01	A	229.508	A	142.579	A	76.8384	P	235.276	P	207.755	P	227.712	P	451.351	P	433.428	P	332.508	A	91.991	P	128.204	A	146.44	A	28.191	A	63.5889	A	92.1353	A	92.6036	A	86.6688	P	192.774	LOC_Os09g38970.1	zinc finger family protein, putative, expressed
Os000111_01	A	118.97	A	133.532	A	88.7175	P	276.87	P	519.989	P	528.539	P	310.987	P	275.321	P	305.29	A	152.502	P	161.985	P	170.575	A	116.821	A	153.451	A	241.73	P	152.079	P	335.534	P	298.687	LOC_Os11g32880.1	DEAD-box ATP-dependent RNA helicase, putative, expressed
Os000112_01	A	109.732	A	99.9801	A	70.9308	P	233.274	P	189.972	P	157.156	A	131.236	P	141.087	P	161.519	A	105.891	A	85.3308	A	82.9059	A	114.774	A	115.325	P	164.286	A	86.1171	P	124.919	P	163.139	-	-
Os000114_01	P	330.143	P	281.979	P	263.264	P	289.452	P	275.261	P	214.865	P	378.382	P	298.574	P	309.198	A	99.332	P	138.852	P	129.074	A	85.381	A	86.8597	A	94.8223	A	70.931	A	105.115	A	90.8838	LOC_Os06g06820.1	hydrolase, alpha/beta fold family domain containing protein, expressed
Os000116_01	P	192.565	P	174.533	P	156.841	P	225.652	P	225.487	P	131.758	P	214.991	P	186.03	P	205.226	A	55.0532	A	53.7303	A	55.1625	A	56.3522	A	52.2302	A	28.0723	A	83.403	A	83.7653	A	92.2228	-	-
Os000119_01	A	64.6213	A	55.6902	A	58.188	P	296.869	P	305.16	P	240.895	P	278.215	P	270.916	P	230.738	P	157.114	P	170.485	A	147.641	A	127.028	P	181.983	P	239.087	P	166.755	P	148.036	P	152.392	LOC_Os03g24339.1	PWWP domain containing protein, expressed
Os000120_01	A	59.8617	A	61.297	A	63.6231	P	218.83	P	250.205	A	87.911	A	72.6935	A	90.8914	P	132.719	A	38.3527	A	33.4693	A	44.2661	A	26.2028	A	10.7779	A	7.55524	A	39.7435	A	-32.3801	A	70.0406	LOC_Os06g40590.1	expressed protein
Os000121_01	P	3827.8	P	2382.82	P	1594.94	P	982.383	P	951.025	P	945.795	P	1657.89	P	1704.64	P	1699.85	P	1129.37	P	926.062	P	867.073	P	938.062	P	941.034	P	963.94	P	821.7	P	900.751	P	1087.62	LOC_Os07g49280.1	PMR5, putative, expressed
Os000123_01	A	112.381	A	84.0957	A	96.3703	P	302.533	P	326.316	P	346.098	A	124.209	A	112.856	A	123.343	A	89.4442	A	104.971	A	103.678	A	77.8692	A	109.469	A	148.907	P	139.806	P	136.857	A	107.143	LOC_Os12g06890.1	OsNucAP3 - Putative Nucleoporin Autopeptidase homologue, expressed
Os000125_01	A	50.9487	A	58.3939	A	53.8841	P	175.502	P	230.224	A	95.4788	A	106.732	P	164.218	P	139.886	A	51.0256	A	54.0693	A	51.0934	A	10.6963	A	27.4498	A	30.7404	A	109.343	A	92.805	A	59.9891	LOC_Os05g40200.1	inactive receptor kinase At2g26730 precursor, putative, expressed
Os000128_01	P	1702.92	P	1268.58	P	2051.84	P	1421.08	P	1312.37	P	1320.38	P	1756.33	P	2167.78	P	1660.67	P	3179.29	P	2255.79	P	2187.43	P	2948.05	P	2109.61	P	2037.61	P	3396.47	P	3145.74	P	3534.67	LOC_Os06g12740.1	expressed protein
Os000129_01	P	185.55	A	128.536	A	103.67	P	223.561	P	203.073	P	158.848	A	183.601	P	225.017	A	92.9514	A	50.3101	A	63.7482	A	62.3864	A	22.0564	A	61.537	A	62.9327	A	121.006	P	110.565	A	103.223	LOC_Os03g53920.1	kinesin motor domain containing protein, putative, expressed
Os000130_01	P	180.291	P	167.595	A	103.319	P	272.109	P	219.219	A	266.634	P	237.462	P	207.898	P	339.071	A	126.666	A	116.928	A	86.4222	A	112.747	P	251.307	P	269.643	P	264.528	P	201.055	P	199.374	LOC_Os06g44210.1	protein phosphatase 2C, putative, expressed
Os000132_01	A	107.482	A	104.44	A	84.7807	P	315.714	P	345.117	P	286.656	P	456.541	P	307.166	P	320.092	P	230.988	P	253.624	P	260.587	P	146.934	P	226.278	A	186.725	P	245.672	P	230.873	P	164.46	LOC_Os01g56140.1	expressed protein
Os000133_01	P	474.356	P	543.074	P	520.657	P	598.503	P	517.206	P	314.051	P	487.335	P	424.474	P	499.231	P	706.821	P	661.943	P	681.819	P	857.224	P	713.159	P	519.779	P	441.54	P	481.638	P	707.856	LOC_Os12g29760.2	oxidoreductase, aldo/keto reductase family protein, putative, expressed
Os000136_01	P	122.955	P	152.328	P	138.133	P	249.272	P	417.428	P	709.006	P	710.389	P	600.121	P	665.142	A	82.017	P	232.455	P	557.418	A	24.6007	P	309.821	P	528.895	P	328.926	P	417.977	P	457.262	LOC_Os02g12480.1	expressed protein
Os000139_01	A	51.4291	A	50.2009	A	60.6938	P	227.345	P	231.479	P	160.361	P	153.292	P	156.199	P	145.159	A	94.4522	P	147.79	P	157.607	A	431.161	A	235.026	A	51.1656	A	87.6639	P	142.247	A	100.347	LOC_Os05g33050.1	ABTB1 - Armadillo repeats with a Bric-a-Brac, Tramtrack, Broad Complex BTB domain, expressed
Os000140_01	A	143.186	A	101.838	A	92.7976	P	192.474	P	205.185	P	132.218	P	213.248	P	179.533	P	196.405	A	32.8286	A	46.1575	A	47.3969	A	31.6582	A	45.4886	A	33.3777	A	80.8038	A	85.7416	A	65.8751	LOC_Os05g35570.1	DUF803 domain containing, putative, expressed
Os000142_01	P	155.207	A	115.932	A	77.9854	P	164.888	A	148.741	A	62.8752	A	83.1281	P	143.183	P	198.326	A	55.6956	A	66.6064	A	81.2175	A	17.9493	A	27.0091	A	28.3031	A	89.3406	A	75.0821	A	79.9018	LOC_Os04g35510.2	CENP-E-like kinetochore protein, putative, expressed
Os000143_01	A	116.942	A	81.4044	A	61.1385	A	145.249	P	235.792	A	102.495	A	68.0387	A	93.1533	P	138.548	A	43.8387	A	30.8408	A	39.3236	A	7.69541	A	34.8491	A	49.0425	A	94.5428	A	75.2442	A	55.5672	LOC_Os05g30010.1	WD domain, G-beta repeat domain containing protein, expressed
Os000144_01	P	127.038	A	115.042	A	104.106	P	309.78	P	330.348	P	252.678	P	195.17	P	183.858	P	206.5	P	182.314	P	172.911	P	139.885	A	84.8272	A	117.844	P	193.461	P	209.274	P	124.001	P	159.12	LOC_Os03g21990.1	WD domain, G-beta repeat domain containing protein, expressed
Os000145_01	P	703.53	P	1245	P	1764.04	P	840.961	P	690.003	P	635.809	P	1557.69	P	973.164	P	944.652	P	2072.74	P	2826.88	P	2543.82	P	1175.87	P	1282.47	P	1637.28	P	1274.67	P	1420.46	P	1903.63	LOC_Os05g28950.1	CAAX amino terminal protease family protein, putative, expressed
Os000147_01	P	323.535	P	239.438	P	205.718	P	486.509	P	439.472	P	483.019	P	306.802	P	256.326	A	142.139	P	189.729	P	227.223	P	286.74	P	191.376	P	168.684	P	210.568	P	167.438	A	110.049	A	114.99	-	-
Os000149_01	A	72.3526	A	108.899	A	90.854	P	318.738	P	531.756	P	544.677	P	687.142	P	381.324	P	288.671	P	204.425	P	225.995	P	343.736	P	175.883	P	227.592	P	254.346	P	401.182	P	244.833	P	203.049	LOC_Os03g51960.1	expressed protein
Os000150_01	P	352.558	P	226.9	P	183.72	P	259.068	P	314.566	P	193.017	P	364.487	P	401.605	P	473.678	P	112.834	A	111.497	P	128.563	A	97.6416	A	100.194	A	103.192	A	104.416	P	126.616	P	126.938	LOC_Os08g42560.1	tRNA synthetase class II core domain containing protein, expressed
Os000151_01	P	152.353	P	175.295	P	180.641	P	1447.85	P	1574.14	P	1252.13	P	1428.15	P	967.253	P	771.017	P	876.27	P	627.345	P	1144.87	P	617.999	P	791.142	P	521.561	P	504.348	P	554.56	P	593.579	LOC_Os10g41260.1	MYB family transcription factor, putative, expressed
Os000152_01	P	1075.4	P	766.283	P	428.937	P	2167.33	P	3409.2	P	2738.92	P	1727.51	P	956.093	P	1548.93	P	1225.63	P	960.766	P	1350.42	P	915.973	P	605.444	P	553.681	P	615.459	P	375.376	P	759.778	LOC_Os02g49680.1	arsenate reductase, putative, expressed
Os000154_01	P	166.395	P	195.629	P	174.415	P	684.674	P	965.022	P	874.827	P	783.1	P	690.629	P	891.062	P	508.011	P	547.892	P	442.67	P	919.054	P	712.805	P	842.843	P	308.733	P	430.018	P	430.707	LOC_Os03g04750.1	60S ribosomal protein L21-2, putative, expressed
Os000158_01	A	99.6219	A	83.646	A	75.3667	P	189.073	P	210.28	P	144.816	A	111.312	A	118.782	P	145.086	A	43.886	A	48.1743	A	41.5274	A	21.4345	A	44.7633	A	56.567	A	54.5112	A	64.9934	A	61.0059	LOC_Os01g45020.2	F-box protein interaction domain containing protein, expressed
Os000160_01	P	247.306	P	199.61	P	222.11	P	1239.04	P	852.343	P	910.587	P	728.312	P	1234.87	P	988.928	P	587.921	P	607.568	P	689.275	P	993.472	P	1084.06	P	689.151	P	394.862	P	411.002	P	762.697	LOC_Os06g09610.1	peroxiredoxin, putative, expressed
Os000163_01	A	100.267	A	112.108	P	112.127	P	211.919	P	200.717	P	139.071	A	81.4196	A	102.578	P	148.537	A	83.4239	A	85.0559	A	92.385	A	315.126	A	288.614	A	185.136	A	82.1355	P	127.122	A	119.308	LOC_Os06g37080.1	L-ascorbate oxidase precursor, putative, expressed
Os000164_01	P	169.337	P	194.999	P	223.508	P	215.769	P	208.5	P	233.052	A	162.917	P	152.333	P	173.907	A	73.5329	A	80.7813	A	87.4832	A	69.3582	A	92.8722	A	91.815	A	75.0086	P	121.128	P	127.817	LOC_Os05g47700.1	LTPL152 - Protease inhibitor/seed storage/LTP family protein precursor, expressed
Os000165_01	P	196.971	P	205.941	P	168.752	P	415.371	P	493.481	P	480.403	P	363.53	P	553.446	P	469.843	A	140.45	P	259.095	P	224.811	P	164.191	P	223.513	P	324.123	P	368.572	P	313.678	P	280.262	LOC_Os06g46930.1	ribosomal protein L24, putative, expressed
Os000166_01	P	177.047	P	178.553	A	121.338	P	476.317	P	396.017	P	272.187	P	311.717	P	345.604	P	415.198	P	186.131	P	208.158	P	231.975	P	276.636	P	257.539	P	257.211	P	222.113	P	214.42	P	272.136	LOC_Os01g58470.1	expressed protein
Os000168_01	P	277.227	P	271.513	P	250.019	P	456.349	P	420.865	P	315.032	P	315.861	P	359.363	P	325.636	P	311.473	P	250.117	P	231.429	P	195.318	P	192.566	P	193.513	P	206.769	P	225.314	P	246.784	LOC_Os07g15959.1	expressed protein
Os000169_01	P	162.147	P	141.097	P	187.045	P	624.141	P	414.629	P	803.684	P	360.512	P	1144.53	P	576.017	P	364.369	P	476.833	P	468.08	P	248.69	P	357.889	P	673.969	P	249.442	P	429.699	P	425.804	LOC_Os05g40010.1	LTPL17 - Protease inhibitor/seed storage/LTP family protein precursor, expressed
Os000170_01	P	180.995	P	154.359	P	176.384	P	362.971	P	354.181	P	249.45	P	281.64	P	242.48	P	254.221	P	192.75	P	220.468	P	218.579	P	152.093	P	188.704	P	269.72	P	218.156	P	233.114	P	271.31	LOC_Os02g41800.1	auxin response factor, putative, expressed
Os000171_01	A	108.86	A	89.9543	A	100.322	P	198.638	P	205.296	P	161.961	P	123.381	A	124.313	A	114.29	A	58.0025	A	75.2038	A	62.8789	A	85.7534	A	77.7126	A	57.6927	A	111.925	P	103.794	P	160.381	-	-
Os000172_01	P	4301.42	P	3957.18	P	2453.89	P	981.176	P	711.138	P	652.348	P	881.018	P	1449.66	P	1905.11	P	957.281	P	1006.38	P	947.802	P	1159.48	P	1060.52	P	966.693	P	751.054	P	838.728	P	855.617	LOC_Os06g07969.1	cytochrome b-c1 complex subunit 8, putative, expressed
Os000174_01	P	3260.3	P	1963.72	P	859.704	P	863.024	P	431.238	P	486.877	P	1614	P	2705.86	P	1876.68	P	418.326	P	575.442	P	412.763	P	199.979	P	288.811	P	510.371	P	655.155	P	637.591	P	370.979	LOC_Os04g17100.1	heavy metal-associated domain containing protein, expressed
Os000176_01	P	208.857	P	179.575	A	115.138	P	519.615	P	568.273	P	647.172	P	312.538	P	365.223	P	392.49	P	266.83	P	348.763	P	434.455	P	196.511	P	261.092	P	283.417	P	254.232	P	260.106	P	227.371	LOC_Os02g02290.1	SNF2 family N-terminal domain containing protein, expressed
Os000177_01	P	641.454	P	766.893	P	857.52	P	1023.19	P	788.377	P	695.818	P	676.072	P	839.695	P	868.533	P	1005.35	P	1024.46	P	1047.48	P	1407.06	P	1293.56	P	1051.68	P	733.171	P	801.941	P	1123.12	LOC_Os09g38370.1	signal peptidase complex subunit 3, putative, expressed
Os000180_01	P	305.639	P	319.84	P	349.565	P	284.035	P	260.695	P	221.22	P	199.882	P	214.099	P	247.53	P	296.293	P	356.076	P	359.041	P	327.906	P	274.011	P	191.445	P	261.455	P	308.071	P	308.2	LOC_Os08g35110.1	OsSAUR33 - Auxin-responsive SAUR gene family member, expressed
Os000182_01	P	276.018	P	226.192	P	186.328	P	201.081	P	210.213	P	149.429	P	202.021	P	181.946	P	229.209	A	62.4886	A	56.5227	A	52.0225	A	36.8985	A	38.0799	A	27.6112	A	55.4042	A	73.3003	A	68.3716	LOC_Os01g72290.1	expressed protein
Os000183_01	P	336.396	P	349.614	P	380.89	P	886.482	P	668.451	P	440.526	P	342.401	P	404.887	P	550	P	492.691	P	483.812	P	529.207	P	802.213	P	578.312	P	326.344	P	370.189	P	479.306	P	520.249	LOC_Os03g07370.1	HNH endonuclease domain-containing protein, putative, expressed
Os000184_01	P	4361.4	P	2631.72	P	917.981	P	320.428	P	276.829	P	240.299	P	1783.87	P	1618.08	P	1782.06	P	148.18	P	179.054	P	194.36	P	134.914	P	139.499	A	125.914	P	169.306	P	165.435	P	224.748	LOC_Os06g23460.1	KH domain containing protein, putative, expressed
Os000185_01	P	720.339	P	699.215	P	830.229	P	2395.14	P	2383.63	P	3250.13	P	2204.78	P	3475.99	P	2933.13	P	1926.24	P	3063.42	P	3030.81	P	2237.92	P	2375.18	P	2999.46	P	1753	P	2932.53	P	2986.91	LOC_Os07g48780.1	OsCam1-2 - Calmodulin, expressed
Os000187_01	P	1155.63	P	1030.05	P	702.066	P	972.656	P	1008.34	P	791.829	P	1171.7	P	1114.66	P	1200.41	P	591.267	P	951.603	P	1125.79	P	791.126	P	622.563	P	554.509	P	385.328	P	439.459	P	608.834	LOC_Os03g63360.1	glutathione S-transferase, putative, expressed
Os000188_01	P	441.416	P	653.583	P	575.101	P	5203.99	P	8041.13	P	7546.28	P	5474.1	P	3079.59	P	3172.56	P	2332.58	P	3168.49	P	3263.18	P	2821.94	P	2463.3	P	2196.65	P	1820.18	P	1781.78	P	1694.89	LOC_Os07g42950.1	40S ribosomal protein S6, putative, expressed
Os000189_01	P	327.884	P	313.475	P	254.846	P	512.278	P	573.695	P	481.959	P	412.162	P	484.644	P	485.332	A	127.131	P	263.753	P	254.473	P	198.074	P	194.057	P	201.814	P	261.712	P	276.319	P	189.4	LOC_Os12g05430.1	ribosomal protein L24, putative, expressed
Os000192_01	P	128.692	A	99.3086	A	114.144	P	422.22	P	382.955	P	344.096	P	537.586	P	379.844	P	332.829	P	186.044	P	190.804	P	211.111	P	183.224	P	236.459	P	156.893	P	211.175	P	158.403	P	220.999	LOC_Os03g14730.1	gibberellin receptor GID1L2, putative, expressed
Os000193_01	A	73.0572	A	64.6536	A	63.1773	P	208.319	P	208.345	P	165.19	P	136.923	P	173.797	P	166.132	A	80.3556	A	94.4351	A	84.8681	A	43.6537	A	50.2844	A	49.6592	A	105.306	P	108.93	P	152.236	LOC_Os07g38260.1	insulin-degrading enzyme, putative, expressed
Os000197_01	A	99.8169	A	109.931	A	117.026	P	446.968	P	393.947	A	282.76	P	224.395	P	219.991	P	227.774	P	166.875	P	195.451	P	237.51	P	149.226	P	161.13	P	195.888	A	115.146	P	174.995	P	240.498	LOC_Os09g15580.1	conserved hypothetical protein
Os000198_01	A	103.157	A	106.474	P	158.526	P	252.67	P	333.521	P	179.236	P	160.406	P	220.348	P	198.995	P	106.146	P	154.771	A	125.082	A	89.8843	A	72.3256	A	95.2117	A	96.4313	P	156.806	P	160.822	LOC_Os05g27820.2	patellin protein, putative, expressed
Os000199_01	P	291.473	P	263.202	P	248.364	P	407.819	P	333.913	P	252.646	P	251.939	P	307.328	P	309.664	P	423.762	P	474.356	P	424.967	P	398.043	P	408.044	P	312.571	P	317.319	P	422.914	P	436.192	LOC_Os09g36280.1	glycosyl hydrolases family 17, putative, expressed
Os000202_01	A	59.5384	A	72.0449	A	58.849	P	160.639	A	185.542	A	171.127	P	175.329	P	189.678	P	190.498	A	67.6153	A	76.9062	A	91.4378	A	19.7269	A	29.2173	A	28.9612	A	53.7015	A	86.3102	A	102.643	LOC_Os03g42350.1	ankyrin, putative, expressed
Os000205_01	P	329.154	P	270.203	A	128.138	P	220.732	P	185.537	P	180.388	P	250.049	P	239.417	P	248.467	A	55.23	A	65.6085	A	76.8783	A	27.4931	A	52.7914	A	27.124	A	74.3301	A	76.8077	A	95.6292	LOC_Os04g42860.1	GDSL-like lipase/acylhydrolase, putative, expressed
Os000206_02	A	59.801	A	62.8094	A	71.686	P	315.357	P	264.404	P	284.184	A	248.628	P	241.426	P	231.476	P	195.674	P	186.968	A	189.666	P	295.379	P	270.18	P	163.264	A	92.6889	A	136.533	P	205.505	-	-
Os000208_01	P	176.483	P	189.605	A	104.462	P	1729.02	P	2628.04	P	2239.48	P	2509.91	P	1043.16	P	1363.49	P	1596.72	P	2270.04	P	2711.24	P	1803.67	P	1502.2	P	929.491	P	890.391	P	639.853	P	879.316	LOC_Os02g09150.1	inorganic H+ pyrophosphatase, putative, expressed
Os000210_01	A	63.5916	A	67.4304	A	81.4501	P	346.56	P	327.901	P	290.401	P	325.793	P	319.325	P	213.853	A	92.9077	P	282.786	P	318.872	A	179.324	P	236.105	A	122.58	P	162.845	P	172.301	A	92.9505	LOC_Os08g06480.1	lissencephaly type-1-like homology motif, putative, expressed
Os000212_01	A	62.0037	A	45.1704	A	47.2961	P	230.848	A	262.615	A	118.031	A	114.254	A	91.72	P	146.354	A	62.6861	A	74.2647	A	75.2683	A	24.3196	A	40.254	A	39.3884	A	52.795	A	70.3336	A	62.5393	LOC_Os04g41490.1	DNA-directed RNA polymerase III subunit RPC1, putative, expressed
Os000213_01	P	278.829	P	236.992	P	205.218	P	734.589	P	1130.2	P	1199.66	P	1256.98	P	1639.33	P	1399.39	P	513.817	P	637.679	P	496.248	P	361.409	P	338.887	P	577.269	P	342.936	P	572.128	P	379.933	LOC_Os10g32920.1	ribosomal protein, putative, expressed
Os000214_01	A	69.8066	A	112.39	A	111.505	P	432.024	P	570.191	A	470.542	P	451.198	P	624.462	P	473.767	P	286.496	P	312.89	P	241.499	P	250.89	P	254.756	P	255.153	P	150.3	P	219.391	P	192.741	LOC_Os02g35950.1	RNA recognition motif containing protein, putative, expressed
Os000215_01	P	164.923	P	183.874	P	143.612	P	248.298	P	272.351	P	194.824	P	198.227	P	231.953	P	232.796	P	153.02	P	134.963	P	184.169	P	143.648	P	142.299	P	145.546	A	111.054	P	159.165	P	181.776	-	-
Os000219_01	P	130.711	A	118.335	A	113.48	P	296.887	P	244.242	P	138.921	P	172.554	P	181.47	P	287.967	A	71.766	A	78.6419	A	70.9235	A	56.0478	A	54.2886	A	46.8496	A	69.0343	A	104.159	A	85.5137	LOC_Os09g36830.1	Skp1 family, dimerisation domain containing protein, expressed
Os000220_01	A	51.1761	A	48.0563	A	57.0542	P	247.76	P	262.43	P	240.222	A	120.725	P	182.962	P	153.516	A	82.5837	A	82.7922	A	78.4798	A	16.4066	A	34.6926	A	58.5367	A	51.2362	A	78.6142	A	83.7887	LOC_Os05g45960.1	aldehyde dehydrogenase, putative, expressed
Os000221_01	P	104.647	A	81.8711	A	86.0522	P	203.327	P	233.602	P	170.411	P	141.096	P	123.645	P	186.455	A	44.6644	A	59.4011	A	62.0392	A	25.4995	A	37.869	A	24.2032	A	40.3359	A	77.5357	A	76.2018	LOC_Os02g14530.1	protein kinase domain containing protein, expressed
Os000225_01	P	239.079	P	309.568	P	333.406	P	497.692	P	467.934	P	451.26	P	238.862	P	367.225	P	316.81	P	364.032	P	498.656	P	458.682	P	332.717	P	325.358	P	361.982	P	482.567	P	408.293	P	335.202	-	-
Os000226_01	P	180.86	P	195.217	P	186.644	P	260.564	P	368.87	P	412.38	P	498.063	P	442.841	P	335.049	P	130.529	P	256.612	P	421.576	P	152.564	P	188.766	P	238.295	P	332.007	P	249.252	P	223.316	LOC_Os07g01990.2	expressed protein
Os000227_01	A	82.8958	A	82.7493	A	79.0414	P	248.41	P	286.02	P	261.895	P	196.584	P	199	P	168.142	A	69.602	P	159.924	P	153.888	A	69.0475	A	79.8846	A	58.3105	A	105.09	A	123.824	A	112.136	LOC_Os02g57860.1	OsFBX71 - F-box domain containing protein
Os000229_01	A	108.344	A	98.8452	A	78.0047	P	209.115	P	303.312	P	139.605	P	169.507	P	166.963	P	150.319	A	50.1813	A	54.5056	A	70.6747	A	-1.10915	A	21.7742	A	28.0695	A	102.362	A	89.0187	A	113.196	LOC_Os07g44090.2	myb-related protein Hv33, putative, expressed
Os000230_01	P	860.518	P	625.593	P	436.098	P	500.81	P	696.18	P	861.016	P	1125.79	P	934.767	P	864.029	P	412.275	P	532.613	P	412.986	P	650.472	P	487.988	P	454.873	P	285.92	P	369.349	P	401.217	-	-
Os000231_01	P	106.232	A	109.593	A	109.193	P	241.152	P	244.217	P	246.106	P	135.295	P	145.586	P	157.817	A	61.0036	A	80.2746	A	70.0211	A	32.3608	A	30.5377	A	31.2091	A	80.4769	A	88.656	A	85.4652	LOC_Os03g11110.1	zinc finger family protein, putative, expressed
Os000235_01	P	518.793	P	358.421	P	197.06	P	431.346	P	502.075	P	372.603	P	432.14	P	383.773	P	302.267	P	241.692	P	339.062	P	397.258	P	272.829	P	253.631	P	265.476	P	381.826	P	334.829	P	316.091	LOC_Os12g21700.1	zinc finger C-x8-C-x5-C-x3-H type family protein, expressed
Os000236_01	A	88.1297	A	63.1419	A	78.6759	P	243.125	P	213.661	A	169.397	A	91.7428	A	105.449	P	172.453	A	56.4323	A	86.2885	A	90.1105	A	46.5208	A	70.7789	A	108.073	A	65.3875	A	81.0217	A	98.0604	LOC_Os08g09200.1	aconitate hydratase protein, putative, expressed
Os000237_01	P	467.318	P	639.62	P	652.605	P	2025.68	P	1468.14	P	1298.1	P	1129.4	P	2003.29	P	1621.79	P	1058.05	P	995.87	P	1032.47	P	1234.24	P	1111.67	P	823.968	P	894.424	P	750.241	P	1125.09	LOC_Os01g71190.1	photosystem II reaction center PSB28 protein, chloroplast precursor, putative, expressed
Os000238_01	P	189.387	P	239.31	P	180.199	P	273.446	P	265.392	P	197.729	P	161.377	P	165.71	P	179.944	P	112.323	A	99.8421	A	79.2054	A	38.4761	A	52.3342	A	43.3394	P	126.952	A	103.199	P	125.816	LOC_Os05g36050.1	serine/threonine-protein kinase, putative, expressed
Os000239_01	A	87.0899	A	87.4833	A	85.8326	P	319.735	P	349.794	P	293.624	P	333.25	P	443.758	P	238.366	P	161.43	P	215.873	P	210.523	P	198.919	A	112.384	A	119.059	A	88.1297	A	122.384	P	127.82	-	-
Os000240_01	A	124.139	A	106.774	P	128.833	P	391.284	P	268.836	P	247.739	P	165.476	P	264.651	P	201.804	A	45.3884	A	71.1427	A	74.639	A	44.7066	A	49.2229	A	64.6975	P	152.069	A	103.275	P	146.898	LOC_Os05g43780.1	ESP1, putative, expressed
Os000241_01	A	114.273	A	90.4808	A	57.7189	P	208.445	A	237.762	A	129.361	A	76.4532	A	96.1606	A	103.469	A	43.5193	A	49.6652	A	63.3674	A	21.1738	A	38.6694	A	33.2652	A	54.3034	A	71.0807	A	64.1023	LOC_Os03g09140.1	ras-related protein, putative, expressed
Os000242_01	P	3904.63	P	3050.77	P	1116.29	P	317.981	P	288.733	P	184.292	P	1192.11	P	2016.58	A	1612.25	A	84.748	A	103.517	A	97.01	A	20.8936	A	47.2354	A	33.8011	P	171.799	P	156.47	P	180.295	LOC_Os12g05040.6	heavy-metal-associated domain-containing protein, putative, expressed
Os000245_01	P	1326.24	P	825.325	P	338.062	P	762.041	P	1059.1	P	976.228	P	1318.47	P	1029.5	P	1186.71	P	343.374	P	411.324	P	471.403	P	302.186	P	282.33	P	249.994	P	364.358	P	351.329	P	385.432	LOC_Os12g12360.1	transposon protein, putative, Mutator sub-class, expressed
Os000246_01	P	4007.66	P	2855.49	P	2276.75	P	4066.24	P	2798.92	P	2311.67	P	4901.87	P	4884.48	P	4548.38	P	7085.06	P	6527.93	P	6654.72	P	9657.16	P	7494.7	P	4969.74	P	4679.32	P	4769.24	P	5632.09	LOC_Os03g06390.1	expressed protein
Os000248_01	P	30732.6	P	32316.4	P	33563.1	P	23271.1	P	18653.8	P	12149.3	P	25996.4	P	22990	P	23353.8	P	47731.9	P	49712.1	P	49488.5	P	26394.8	P	26375.4	P	26790.8	P	42501.3	P	42913	P	46308.1	LOC_Os02g08440.3	OsWRKY71 - Superfamily of TFs having WRKY and zinc finger domains, expressed
Os000249_01	A	43.6062	A	44.5771	A	63.1777	P	214.836	P	304.534	P	364.938	P	234.191	P	187.718	P	214.995	P	142.906	A	149.462	A	154.369	A	108.433	A	84.9003	A	44.9339	A	78.0912	A	87.6892	A	69.3017	LOC_Os03g58810.1	DEAD-box ATP-dependent RNA helicase, putative, expressed
Os000251_01	P	1133.13	P	931.61	P	708.733	P	295.625	P	286.894	P	223.988	P	706.832	P	900.385	P	972.353	P	132.632	P	201.495	P	122.897	A	80.303	A	108.936	P	182.835	P	152.904	P	156.273	P	148.375	LOC_Os03g09170.1	ethylene-responsive transcription factor, putative, expressed
Os000252_01	P	183.54	P	248.336	A	150.767	P	534.429	P	961.691	P	1075.47	P	821.322	P	671.046	P	515.28	P	380.27	P	583.197	P	714.096	P	460.795	P	347.796	P	366.266	P	506.898	P	449.44	P	227.187	LOC_Os02g47140.2	L11 domain containing ribosomal protein, putative, expressed
Os000253_01	P	1825.72	P	1397.08	P	773.95	P	470.037	P	364.263	P	276.265	P	630.926	P	607.431	P	567.27	P	911.597	P	920.899	P	1087.7	P	943.925	P	928.953	P	701.303	P	796.429	P	826.661	P	1132.97	LOC_Os05g47960.1	expressed protein
Os000254_01	P	7629.16	P	6181.94	P	5209.01	P	25992.3	P	18966.2	P	11138.1	P	16128.6	P	11845.5	P	18159.4	P	25868.8	P	24277.7	P	32705.4	P	20534.1	P	19373.2	P	13200.8	P	16646.7	P	12107.7	P	25731.3	-	-
Os000255_01	P	128.918	A	119.035	A	106.288	P	211.846	P	256.429	P	255.405	P	136.6	P	164.809	P	174.313	A	76.0133	A	91.2175	A	83.3203	A	49.5931	A	54.0669	A	37.5069	A	33.0348	A	68.3775	P	135.599	LOC_Os12g39160.1	expressed protein
Os000257_01	P	226.641	P	233.883	P	272.28	P	753.938	P	575.526	P	896.538	P	619.022	P	826.296	P	440.818	P	520.528	P	682.173	P	1111.59	P	663.56	P	698.285	P	719.73	P	847.836	P	863.112	P	538.039	LOC_Os01g04350.1	hsp20/alpha crystallin family protein, putative, expressed
Os000258_01	A	97.7752	A	103.104	P	98.3382	A	169.461	A	208.91	A	111.166	A	118.678	P	162.149	P	160.793	A	57.2174	A	81.0523	A	81.9981	A	33.8759	A	58.3727	A	56.8037	A	130.597	A	108.142	A	109.784	LOC_Os02g51320.1	helix-loop-helix DNA-binding domain containing protein, expressed
Os000262_01	A	61.1657	A	48.3146	A	64.136	P	231.447	P	252.795	P	170.678	P	223.907	P	145.469	P	178.632	P	121.807	A	114.747	A	94.8459	A	62.1634	A	39.273	A	34.8122	A	67.2319	A	83.0471	P	113.465	LOC_Os02g42220.1	transposon protein, putative, unclassified, expressed
Os000263_01	P	1718	P	1768.79	P	1757.37	P	1356.06	P	1237	P	943.385	P	959.04	P	1125.01	P	1348.52	P	2560.2	P	2315.56	P	2066.68	P	2696.16	P	2185.35	P	1572.86	P	1709.35	P	1849.73	P	2103.7	LOC_Os04g40510.2	glycosyl hydrolase family 5 protein, putative, expressed
Os000265_01	P	152.324	P	154.854	P	145.967	P	267.981	P	229.293	P	177.948	A	181.364	P	201.438	P	268.369	P	142.986	A	132.529	P	163.904	P	153.734	P	160.059	P	163.616	P	147.334	P	185.398	P	185.782	LOC_Os12g04750.1	OsDegp14 - Putative Deg protease homologue, expressed
Os000266_01	P	421.82	P	368.6	A	261.048	P	207.402	P	191.207	P	120.251	A	155.737	A	209.299	A	273.054	A	98.1504	P	115.046	A	102.308	A	88.3911	A	75.2601	A	66.2079	A	85.3096	A	98.1674	A	93.8213	LOC_Os03g44290.1	expansin precursor, putative, expressed
Os000268_01	P	24753.6	P	28691.2	P	29294.2	P	31616	P	29698.4	P	23122.1	P	28867	P	28522.7	P	33320.5	P	47717.3	P	44342.8	P	44447.3	P	27558.7	P	29674.5	P	27967.7	P	29762.9	P	30806	P	34549.8	LOC_Os12g06160.1	DUF623 domain containing protein, expressed
Os000269_01	A	108.122	A	87.4876	A	84.8547	P	415.855	P	344.084	P	297.345	P	338.397	P	384.725	P	266.173	P	147.87	P	194.406	P	216.988	A	100.594	P	131.171	A	93.513	P	162.862	P	201.362	P	145.112	LOC_Os12g31440.1	expressed protein
Os000271_01	P	377.658	P	347.688	P	212.26	P	966.447	P	1705.99	P	1484.1	P	1308.68	P	689.813	P	758.31	P	775.692	P	720.762	P	695.704	P	1307.45	P	980.377	P	464.501	P	254.452	P	240.054	P	512.264	LOC_Os02g22100.7	OsRhmbd6 - Putative Rhomboid homologue, expressed
Os000273_01	P	169.306	P	186.097	P	169.128	P	251.423	P	305.32	P	237.102	P	148.538	P	196.065	P	181.469	A	88.6396	A	62.0257	A	79.5287	A	52.4062	A	57.2009	A	55.585	A	62.4753	A	81.4508	A	81.4412	LOC_Os04g48490.1	fasciclin-like arabinogalactan protein, putative, expressed
Os000275_01	P	298.442	P	260.053	P	199.591	P	369.624	P	328.06	P	260.748	P	350.509	P	292.333	P	279.655	P	148.418	P	254.328	P	246.687	A	216.252	P	201.97	A	97.3356	P	131.693	P	126.691	A	110.131	-	-
Os000277_01	P	163.055	A	94.762	A	63.9621	P	218.518	P	220.343	A	240.465	P	234.601	P	192.743	P	176.57	P	150.461	P	165.414	A	149.383	P	158.599	A	104.952	A	89.9885	A	104.286	P	163.417	A	134.558	LOC_Os09g33450.1	zinc finger DHHC domain-containing protein, putative, expressed
Os000280_01	P	291.66	P	235.756	P	183.327	P	181.639	P	230.21	A	153.353	P	337.762	P	280.208	P	357.311	A	29.8832	A	48.5789	A	52.5327	A	3.6989	A	24.816	A	27.2163	A	64.3879	A	75.3977	A	77.8954	LOC_Os11g24140.1	plastocyanin-like domain containing protein, putative, expressed
Os000281_01	P	2715.81	P	1945.25	P	1060.07	P	479.01	P	580.608	P	481.72	P	1153.44	P	1206.9	P	1233.66	P	262.898	P	395.427	P	438.448	P	258.799	P	260.291	P	229.87	P	366.433	P	367.924	P	379.597	LOC_Os01g48120.1	hypothetical protein
Os000282_01	P	4038.81	P	2341.66	P	647.864	P	733.282	P	954.21	P	988.056	P	2168.04	P	1157.45	P	562.552	P	456.782	P	745.948	P	1163.12	P	684.95	P	667.481	P	500.367	P	1200.85	P	652.508	P	516.492	LOC_Os03g60100.1	50S ribosomal protein L17, putative, expressed
Os000283_01	P	208.256	A	132.621	A	90.3153	P	170.472	P	145.709	A	154.247	P	236.34	P	257.022	P	240.803	A	68.214	A	94.1032	A	114.472	A	44.0851	A	93.7293	A	138.608	A	83.4775	P	160.229	P	208.921	LOC_Os07g02200.1	plastocyanin-like domain containing protein, putative, expressed
Os000285_01	A	25.7197	A	30.1034	A	29.9667	A	741.312	A	441.534	A	430.449	A	365.666	A	337.968	A	216.793	A	74.3583	A	82.4189	A	91.6623	A	14.1454	A	30.1105	A	46.0112	A	94.2245	A	101.23	A	113.457	LOC_Os07g05580.1	ribosomal protein L7Ae, putative, expressed
Os000288_01	P	11484	P	14983	P	19135.2	P	9993.97	P	8667.4	P	6565.79	P	7617.24	P	7847.48	P	8518.43	P	25117	P	25322.2	P	26822.5	P	21675.7	P	19674.9	P	16834.3	P	13066	P	15668.4	P	19763.1	LOC_Os07g01480.2	oxygen evolving enhancer protein 3 domain containing protein, expressed
Os000289_01	P	314.551	P	414.035	P	385.415	P	1779.76	P	1948.43	P	913.46	P	1184.13	P	629.15	P	819.583	P	935.762	P	953.987	P	817.421	P	819.715	P	639.204	P	602.551	P	500.442	P	438.81	P	563.707	LOC_Os03g14669.2	core histone H2A/H2B/H3/H4, putative, expressed
Os000290_01	P	599.091	P	625.827	P	700.332	P	3778.86	P	3172.29	P	3276.7	P	3598.95	P	4001.86	P	3353.34	P	3109.75	P	3634.5	P	4116.53	P	2174.68	P	2513.46	P	3356.71	P	2244.17	P	2703.04	P	2734.73	LOC_Os07g12170.1	ADP-ribosylation factor, putative, expressed
Os000295_01	P	143.017	P	167.462	A	111.788	P	372.637	P	351.653	P	381.353	P	474.383	P	368.307	P	356.723	P	362.629	P	282.942	P	188.604	P	377.08	P	187.62	A	88.8333	P	220.733	P	205.295	P	255.132	LOC_Os02g52470.2	ATP-binding domain-containing protein, putative, expressed
Os000296_01	P	156.483	A	121.204	A	105.403	P	207.662	P	251.89	P	224.254	P	298.041	P	214.115	P	242.896	P	173.193	P	228.286	P	274.748	A	91.5071	A	102.133	A	82.8845	A	113.18	P	130.296	A	151.644	LOC_Os11g30410.1	ThiF family domain containing protein, putative, expressed
Os000298_01	P	200.017	P	167.814	A	111.078	P	256.528	P	292.662	P	316.179	P	240.076	P	230.13	P	201.33	A	138.128	P	164.21	P	183.123	A	101.733	A	96.2508	A	76.1459	P	170.954	A	130.293	P	156.007	LOC_Os02g32340.1	Spc97 / Spc98 family protein, putative, expressed
Os000299_01	A	75.8967	A	89.4014	A	104.283	P	322.393	P	265.034	P	277.007	P	308.89	P	280.943	P	240.189	P	174.1	P	200.21	P	278.241	P	325.604	P	260.957	P	175.264	P	138.926	P	185.037	P	241.669	LOC_Os02g50880.1	OsDegp3 - Putative Deg protease homologue, expressed
Os000300_01	A	53.6472	A	51.6887	A	62.9655	P	222.735	P	236.171	A	281.289	A	128.183	A	105.819	P	125.324	A	57.1969	A	62.448	A	55.3936	A	40.0039	A	46.4492	A	36.9243	A	74.2478	A	111.783	A	109.857	LOC_Os03g05020.1	PIR, putative, expressed
Os000301_01	A	52.6235	A	96.6523	A	93.9989	P	379.217	P	430.999	P	471.197	P	428.717	P	376.29	P	318.665	P	224.17	P	238.787	P	360.354	P	261.176	P	245.335	P	194.501	P	177.238	P	189.73	P	239.317	LOC_Os03g56410.2	expressed protein
Os000303_01	A	65.1481	A	83.9802	A	106.106	P	188.942	P	268.407	P	163.961	P	167.049	P	181.127	P	143.091	A	51.6626	A	92.4541	A	102.55	A	48.8421	A	42.0018	A	25.4185	A	96.0267	A	102.872	A	72.1142	LOC_Os03g56360.1	transposon protein, putative, unclassified
Os000304_01	P	141.036	A	129.142	A	103.981	P	661.781	P	1432.05	P	1590.16	P	1121.12	P	1524.17	P	938.121	P	467.862	P	701.741	P	1208.29	P	951.287	P	513.726	P	358.805	P	640.627	P	662.646	P	524.774	LOC_Os03g20380.8	CAMK_KIN1/SNF1/Nim1_like.2 - CAMK includes calcium/calmodulin depedent protein kinases, expressed
Os000305_01	A	69.3193	A	69.4043	A	75.9569	P	300.626	P	263.703	A	164.086	P	239.47	P	272.641	P	255.972	A	68.2215	A	110.009	A	117.257	P	114.08	A	99.1435	A	105.358	A	133.069	P	144.275	P	196.427	LOC_Os03g53590.2	expressed protein
Os000311_01	P	460.834	P	319.689	P	225.386	P	333.202	P	267.468	P	200.448	P	375.355	P	434.109	P	541.134	P	130.939	P	147.804	P	169.026	A	93.9508	A	113.396	A	124.595	P	310.156	P	331.178	A	208.501	LOC_Os03g49170.1	zinc finger family protein, putative, expressed
Os000312_01	P	133.741	A	125.606	A	96.2886	P	239.893	A	304.998	A	166.141	A	137.171	P	202.453	P	181.067	A	58.9451	A	66.8211	A	71.3548	A	54.8186	A	45.8961	A	35.9547	A	110.444	A	98.1644	A	88.8034	LOC_Os06g04240.1	expressed protein
Os000314_01	A	117.515	A	104.316	P	151.928	P	529.616	P	388.751	P	574.363	P	449.512	P	938.59	P	514.98	P	263.308	P	464.612	P	585.671	P	220.941	P	267.52	P	321.468	P	278.001	P	388.635	P	314.319	LOC_Os02g08180.1	protein transport protein SEC61 subunit gamma, putative, expressed
Os000316_01	P	5436.42	P	3582.93	P	1752.86	P	1635.1	P	1356.63	P	1346.74	P	2071.15	P	2318.08	P	2884.34	P	2000.49	P	2227	P	2273.46	P	2359.5	P	2224.7	P	1914.74	P	1046.53	P	1369.09	P	1858.6	LOC_Os03g30430.2	nitrilase-associated protein, putative, expressed
Os000317_01	A	77.292	A	74.6198	A	80.3878	P	268.036	P	350.855	A	264.348	A	100.704	A	117.177	P	130.749	A	51.9406	A	14.3503	A	3.8895	A	-10.3597	A	7.76962	A	28.3059	A	61.6241	A	96.9699	A	89.8019	LOC_Os12g32450.1	expressed protein
Os000319_01	P	524.432	P	402.449	P	220.407	P	239.055	P	313.407	P	229.25	P	380.72	P	371.711	P	305.754	A	61.5832	A	138.73	P	176.025	A	53.0098	A	65.1173	A	62.2588	A	62.1489	A	82.2402	A	70.6825	LOC_Os06g45830.1	expressed protein
Os000320_01	A	101.633	A	91.5695	A	80.2622	P	354.568	P	370.954	P	390.635	P	429.44	P	408.97	P	277.195	P	212.563	P	387.692	P	556.35	P	304.843	P	327.608	A	244.671	P	198.97	P	236.258	P	193.706	LOC_Os04g55960.1	NADPH reductase, putative, expressed
Os000321_01	P	35479.8	P	40719.8	P	37096.4	P	41995.7	P	35377.4	P	29018.3	P	34809	P	33140	P	42427.4	P	43166.7	P	44299.1	P	44847	P	43659.7	P	42920.6	P	39271	P	54832.7	P	51983.4	P	52839.1	-	-
Os000322_01	P	442.031	P	471.382	P	269.328	P	1816.33	P	2508.03	P	1760.77	P	1878.76	P	913.567	P	816.836	P	1101.34	P	784.01	P	611.324	P	2433.88	P	1287.92	P	549.983	P	362.852	P	292.598	P	794.664	LOC_Os07g28610.2	expressed protein
Os000323_01	P	106.359	A	96.634	A	83.8585	P	207.981	P	237.361	A	220.901	P	166.663	P	137.323	P	167.862	A	62.139	A	51.9689	A	28.1303	A	40.947	A	48.4967	A	55.1787	A	89.181	A	118.933	A	115.834	-	-
Os000324_01	P	129.747	A	101.171	A	63.5155	P	259.144	P	329.775	P	283.7	P	256.752	P	256.426	P	220.523	P	202.678	P	251.126	P	219.583	A	42.5162	A	42.4061	A	75.6447	P	450.781	P	383.902	P	384.316	LOC_Os04g47700.1	expressed protein
Os000325_01	P	119.483	A	103.186	P	106.113	P	212.022	P	258.939	P	211.874	P	169.101	P	183.733	P	238.612	A	48.9651	A	109.168	A	120.831	A	25.617	A	32.4036	A	36.1133	A	69.0075	A	88.4298	A	67.4148	LOC_Os07g27810.1	fiber protein Fb34, putative, expressed
Os000326_01	P	547.598	P	550.744	P	325.155	P	1978.69	P	2181.41	P	2120	P	3019.76	P	1809.18	P	1124.42	P	1289.77	P	1859.1	P	2859	P	2638.03	P	1393.07	P	753.081	P	946.503	P	654.95	P	928.577	LOC_Os03g59110.1	pheophorbide a oxygenase, chloroplast precursor, putative, expressed
Os000327_01	A	117.384	A	110.845	A	94.4164	P	426.089	P	493.155	P	418.677	P	441.952	P	445.319	P	311.468	P	190.35	P	334.714	P	430.456	P	308.827	P	261.33	P	323.255	P	314.735	P	286.04	P	213.311	LOC_Os06g36770.2	serine/threonine protein phosphatase 2A 55 kDa regulatory subunit B, putative, expressed
Os000330_01	P	149.792	P	169.565	P	170.672	P	669.661	P	598.6	P	664.798	P	514.019	P	704.258	P	633.448	P	454.486	P	572.083	P	549.664	P	397.731	P	379.923	P	410.329	P	361.036	P	488.372	P	489.565	LOC_Os07g31370.1	ras-related protein, putative, expressed
Os000333_01	P	530.708	P	435.214	P	343.81	P	971.749	P	596.032	P	820.162	P	486.281	P	787.638	P	594.301	P	298.028	P	472.085	P	447.229	P	363.07	P	307.734	P	339.955	P	353.338	P	373.051	P	266.336	LOC_Os03g31839.1	transposon protein, putative, unclassified
Os000334_01	P	1849.16	P	2141.52	P	2602.07	P	13028.7	P	10385.7	P	9104.19	P	15779.7	P	11996.3	P	8242.37	P	17267.3	P	18420.9	P	19081	P	19656.5	P	20250.6	P	20275.6	P	12137.2	P	13130.3	P	12930.8	LOC_Os03g15180.1	PH domain containing protein, expressed
Os000335_01	A	58.657	A	57.7296	A	63.5442	P	268.803	P	207.015	A	160.442	A	209.368	P	318.323	P	258.265	P	231.113	P	240.837	A	112.225	A	66.8766	A	88.3564	A	97.2827	A	106.2	P	173.634	A	104.86	LOC_Os03g60550.1	ThiF family domain containing protein, putative, expressed
Os000336_01	P	140.247	A	110.944	A	83.299	P	222.793	P	237.969	P	160.041	P	193.85	P	163.491	P	212.959	A	63.9654	A	63.8626	A	76.2488	A	12.5191	A	25.7352	A	46.1544	A	95.3586	A	88.0618	A	72.7635	LOC_Os02g04440.2	transducin family protein, putative, expressed
Os000337_01	A	56.0972	A	53.3386	A	71.5469	P	280.69	P	245.055	P	225.424	P	153.316	P	235.44	P	211.386	P	154.715	P	171.41	P	174.758	A	85.0564	A	93.6069	A	129.98	A	74.6618	A	108.038	P	112.654	LOC_Os02g25580.1	Sec1 family transport protein, putative, expressed
Os000338_01	A	72.0399	A	69.3017	A	68.6206	P	411.686	P	369.927	P	405.663	P	359.947	P	404.667	P	348.545	P	239.95	P	277.469	P	329.056	P	169.474	P	159.391	P	163.893	P	164.84	P	203.55	P	202.256	LOC_Os02g04490.1	histone acetyltransferase HAC1, putative, expressed
Os000340_01	P	3109.62	P	3666.04	P	3756.36	P	1043.79	P	888.221	P	503.543	P	1675.27	P	1430.65	P	1628.84	P	3216.02	P	3475.49	P	3383.15	P	2186.93	P	2294.94	P	2469.04	P	2071.26	P	2055.84	P	2699.84	LOC_Os10g25290.1	ZIM domain containing protein, putative, expressed
Os000342_01	A	70.563	A	101.495	A	68.2964	P	340.006	P	539.255	P	547.336	P	700.164	P	343.506	P	380.592	P	344.868	P	348.179	P	403.39	P	463.398	P	432.664	A	145.242	P	192.371	P	179.713	P	180.863	LOC_Os10g34180.2	transcription factor BTF3, putative, expressed
Os000343_01	A	72.7224	A	83.2999	A	85.7349	P	420.251	P	479.858	P	528.593	P	788.098	P	621.06	P	321.56	P	300.697	P	545.339	P	834.87	P	480.273	P	394.013	A	242.235	P	321.661	P	323.713	P	265.859	LOC_Os02g35600.1	PHD finger protein, putative, expressed
Os000345_01	A	71.4665	A	73.972	A	81.0931	P	289.572	P	371.775	P	308.141	P	310.052	P	302.74	P	218.199	A	105.339	P	272.051	P	342.228	A	138.681	A	147.641	A	168.419	P	182.501	P	197.503	A	107.205	LOC_Os06g06090.1	CGMC_MAPKCMGC_2_ERK.12 - CGMC includes CDA, MAPK, GSK3, and CLKC kinases, expressed
Os000347_01	P	4433.05	P	5298.92	P	6494.21	P	4856.71	P	3374.18	P	3518.3	P	1687.33	P	2569.24	P	3691.27	P	5404.48	P	5429.88	P	6446.26	P	5350.66	P	5212.6	P	5829.05	P	4611.93	P	4567.97	P	6322.89	LOC_Os03g22790.1	beta-amylase, putative, expressed
Os000350_01	P	143.809	P	169.725	P	133.664	P	720.751	P	1054.08	P	930.003	P	1180.33	P	870.307	P	633.344	P	486.319	P	951.866	P	1082.92	P	923.858	P	588.767	P	471.593	P	541.505	P	588.147	P	440.482	LOC_Os02g54470.2	60S ribosomal protein L35a-3, putative, expressed
Os000351_01	P	125.386	A	104.082	A	87.704	P	692.25	P	853.55	P	683.888	P	980.574	P	919.479	P	507.897	P	340.555	P	516.158	P	608.617	P	616.261	P	322.493	A	238.279	P	454.134	P	396.187	P	304.208	LOC_Os12g39200.2	seed maturation protein PM23, putative, expressed
Os000352_01	P	142.492	P	152.633	P	139.758	P	292.596	P	251.852	P	181.321	P	188.399	P	197.192	P	260.282	P	266.285	P	263.606	P	260.321	P	247.875	P	181.882	P	160.864	P	209.089	P	228.813	P	213.641	LOC_Os04g57200.1	heavy metal transport/detoxification protein, putative, expressed
Os000353_01	A	57.2746	A	53.2031	A	45.5349	P	250.065	P	222.564	P	130.158	A	148.751	P	198.484	P	206.61	A	145.066	A	128.261	A	103.078	A	48.694	A	68.038	A	71.1292	A	106.16	A	93.7112	A	94.3764	LOC_Os02g45250.1	homeobox and START domains containing protein, putative, expressed
Os000354_01	A	80.1667	A	83.7249	A	59.0352	P	243.82	P	223.176	P	223.354	P	184.159	P	175.315	P	200.116	A	72.6854	A	71.8376	A	110.072	A	19.4343	A	36.6834	A	47.4766	A	89.722	A	112.275	P	142.242	LOC_Os12g10720.2	glutathione S-transferase, putative, expressed
Os000357_01	A	103.812	A	75.4573	A	85.1497	P	344.965	P	323.64	P	315.964	P	162.681	P	276.625	P	313.9	A	81.4351	P	181.899	P	189.652	A	66.6164	A	70.7997	A	91.8607	P	172.92	P	155.547	P	139.267	LOC_Os09g24260.1	WD domain, G-beta repeat domain containing protein, expressed
Os000358_01	A	162.151	A	212.188	A	60.9565	P	211.363	P	219.22	A	139.188	P	142.218	P	191.073	P	215.873	A	83.6438	A	115.265	A	130.86	A	49.7026	A	72.8739	A	71.793	A	146.896	P	136.281	P	153.037	LOC_Os05g46560.2	RAN GTPase-activating protein 1, putative, expressed
Os000359_01	P	145.977	P	137.218	P	143.484	P	283.794	P	240.848	P	141.879	P	179.541	P	161.594	P	198.784	P	166.834	P	158.695	P	134.585	P	118.65	A	88.4518	A	61.6108	A	78.2915	A	106.879	P	151.684	LOC_Os11g48070.1	GDSL-like lipase/acylhydrolase, putative, expressed
Os000362_01	P	208.797	P	205.801	P	171.946	P	259.893	P	207.227	A	136.078	P	144.307	P	165.974	P	209.042	A	98.2573	A	120.685	A	122.588	A	54.3015	A	58.8272	A	52.564	A	134.666	P	143.72	P	148.177	LOC_Os03g58600.1	PAZ domain containing protein, putative, expressed
Os000364_01	P	410.682	P	351.292	A	84.0411	P	238.418	P	200.286	P	209.724	P	264.564	P	258.865	P	287.138	A	118.768	P	151.852	A	119.361	P	186.677	P	160.947	A	87.6939	A	87.0591	P	100.621	A	111.361	LOC_Os03g42750.2	roothairless 1, putative, expressed
Os000365_01	P	1253.67	P	965.758	P	691.204	P	768.02	P	967.332	P	944.938	P	2196.63	P	1551.43	P	1580.52	P	648.546	P	1045.06	P	921.456	P	1086.01	P	807.269	P	424.951	P	440.736	P	485.473	P	666.268	LOC_Os03g17084.1	Core histone H2A/H2B/H3/H4 domain containing protein, putative
Os000366_01	P	264.093	P	311.449	P	300.283	P	1906.11	P	3435.7	P	2503.12	P	2618.03	P	2052.35	P	2338.31	P	1499.1	P	1627.67	P	1841.28	P	1929.29	P	1155.86	P	651.359	P	1052.04	P	660.091	P	1212.98	LOC_Os05g43310.1	photosystem II reaction center W protein, chloroplast precursor, putative, expressed
Os000367_01	P	1079.41	P	855.567	P	722.498	P	4112.58	P	5301.81	P	7067.7	P	9859.35	P	8814.9	P	3444.48	P	4723.61	P	8878.21	P	13660.1	P	6822.82	P	5832.33	P	4375.41	P	4801.43	P	2838.16	P	3458.86	LOC_Os06g01850.1	ferredoxin--NADP reductase, chloroplast precursor, putative, expressed
Os000369_01	P	283.654	P	230.081	P	150.53	P	584.045	P	659.092	P	661.756	P	815.718	P	498.804	P	361.548	P	304.266	P	493.772	P	627.026	P	569.536	P	436.134	A	209.515	P	378.794	P	258.488	P	241.219	LOC_Os01g15490.1	phosphoadenosine phosphosulfate, putative, expressed
Os000370_01	P	1813.51	P	1537.39	P	694.933	P	272.951	P	248.761	P	253.2	P	353.857	P	402.91	P	492.279	P	181.133	P	148.502	A	99.8219	A	85.5566	A	86.5523	A	87.1837	P	193.378	P	242.485	P	274.81	LOC_Os03g33090.1	DUF260 domain containing protein, putative, expressed
Os000371_01	P	119.201	A	108.493	A	93.6946	P	276.365	P	261.649	P	284.959	P	229.606	P	240.851	P	208.064	P	206.206	P	220.811	P	245.409	P	271.917	P	223.262	P	175.656	P	201.372	P	231.942	P	236.186	LOC_Os10g38950.1	CGMC_MAPKCMGC_2_ERK.14 - CGMC includes CDA, MAPK, GSK3, and CLKC kinases, expressed
Os000372_01	A	109.882	A	92.5508	A	76.7414	P	255.438	P	316.347	P	398.084	P	422.536	P	288.918	P	263.782	P	223.093	P	307.525	P	373.52	P	253.747	P	256.331	A	147.332	P	238.058	P	234.217	A	140.941	LOC_Os01g55170.1	la domain containing protein, expressed
Os000373_01	P	248.128	P	219.385	P	230.688	P	1306.53	P	1456.55	P	1527.07	P	2889.91	P	1597.55	P	919.931	P	876.379	P	1131.7	P	1120.79	P	1095	P	1060.28	P	811.295	P	1342.35	P	962.739	P	726.604	LOC_Os03g10700.1	expressed protein
Os000375_01	P	795.433	P	602.712	P	984.101	P	1992.43	P	1761.24	P	1933.12	P	2230.77	P	2058.3	P	999.442	P	996.361	P	1641.73	P	2732.52	P	1773.47	P	1761.48	P	984.472	P	2956.82	P	1688.33	P	1278.71	LOC_Os02g09590.1	ribosome, putative, expressed
Os000379_01	A	72.0556	A	72.4498	A	97.7469	P	483.515	P	479.976	P	724.989	P	433.815	P	539.901	P	346.652	P	331.385	P	455.616	P	580.613	P	276.794	P	328.661	P	380.174	P	248.967	P	247.046	P	250.777	LOC_Os03g08280.2	peptidase, T1 family, putative, expressed
Os000380_01	A	108.235	A	100.711	A	51.6161	P	698.449	P	1488.84	P	1092.75	P	456.661	P	383.135	P	853.424	P	233.161	P	263.28	P	176.469	P	328.356	P	180.7	P	191.55	P	219.391	A	120.853	P	254.259	LOC_Os05g47540.1	CPuORF26 - conserved peptide uORF-containing transcript, expressed
Os000381_01	A	106.796	A	108.7	A	124.3	P	369.496	P	243.737	P	202.152	P	262.555	P	319.234	P	275.953	A	132.483	P	219.891	P	235.476	P	202.696	P	211.797	P	367.188	P	223.242	P	269.758	P	224.937	LOC_Os09g19890.2	expressed protein
Os000382_01	P	541.719	P	561.555	P	375.263	P	280.25	P	311.781	P	224.261	P	209.406	P	265.844	P	241.896	A	69.2943	A	83.9688	A	79.9557	A	34.3765	A	49.0701	A	46.5176	A	103.634	P	147.699	P	229.322	LOC_Os04g05050.1	pectate lyase precursor, putative, expressed
Os000383_01	P	3111.7	P	3337.41	P	3420.87	P	8098.87	P	7360.61	P	8036.03	P	6753.23	P	6395.81	P	5554.1	P	10426.5	P	10297.5	P	8667.85	P	6397.89	P	6953.83	P	7985.61	P	5677.14	P	6775.29	P	6935.35	LOC_Os01g31360.2	expressed protein
Os000384_01	P	690.989	P	789.974	P	1109.8	P	3006.35	P	3215.18	P	2478.9	P	3067.52	P	2851.49	P	2175.9	P	2700.36	P	2517.17	P	2639.36	P	1555.01	P	1730.36	P	1990.22	P	1345.46	P	1463.93	P	1992.33	LOC_Os04g42020.1	CCT/B-box zinc finger protein, putative, expressed
Os000385_01	A	73.5382	A	57.5687	A	74.6442	P	299.713	P	294.256	P	319.632	P	205.554	P	309.631	P	322.976	P	141.702	P	187.211	P	213.366	P	124.316	P	139.806	P	189.198	P	138.82	P	135.573	P	150.134	LOC_Os12g06800.1	serine esterase family protein, putative, expressed
Os000386_01	P	601.301	P	732.124	P	1180.06	P	4631.68	P	5454.35	P	6391.05	P	2574.39	P	2470.23	P	2859.45	P	3152.6	P	2964.63	P	3674.06	P	3326.54	P	3819.56	P	2993.79	P	2179.28	P	1643.56	P	1935.07	LOC_Os06g08670.1	glutathione peroxidase, putative, expressed
Os000387_01	P	151.346	A	121.661	A	94.9596	P	430.074	P	351.97	A	285.679	P	259.742	P	284.408	P	335.821	P	219.77	P	210.996	P	298.359	P	323.371	P	239.841	P	203.156	P	205.629	P	279.181	P	311.067	LOC_Os07g18050.1	RNA-binding motif protein, putative, expressed
Os000388_01	A	91.4108	A	110.296	A	107.348	P	960.34	P	983.989	P	1025.19	P	843.657	P	1168.53	P	858.932	P	487.626	P	596.66	P	657.003	P	743.608	P	466.904	P	427.906	P	245.155	P	293.337	P	362.248	LOC_Os09g36300.3	OsLonP4 - Putative Lon protease homologue, expressed
Os000389_01	A	72.1739	A	100.053	A	109.949	P	319.339	P	352.401	P	413.756	P	375.341	P	284.119	P	243.785	P	177.197	P	216.524	P	250.575	P	129.4	P	135.347	P	161.413	P	127.716	P	218.602	A	120.976	LOC_Os05g27730.1	OsWRKY53 - Superfamily of TFs having WRKY and zinc finger domains, expressed
Os000393_01	A	75.8532	A	69.3195	A	137.445	P	350.633	P	253.617	P	239.299	P	217.239	P	463.808	P	268.78	P	164.82	P	258.997	P	351.016	P	294.608	P	246.455	P	333.552	P	160.643	P	256.305	P	264.31	LOC_Os07g09680.1	ras-related protein, putative, expressed
Os000395_01	A	68.7938	A	65.715	A	53.363	P	521.532	P	471.295	P	571.547	P	545.261	P	602.812	P	486.768	P	288.551	P	395.387	P	524.932	P	262.96	P	331.829	A	267.505	P	207.874	P	237.973	P	237.518	LOC_Os08g40260.1	OsSPL15 - SBP-box gene family member, expressed
Os000396_01	A	110.203	P	124.03	P	98.5853	P	389.299	P	355.068	P	418.472	P	311.745	P	373.614	P	284.557	P	195.426	P	270.107	P	308.116	P	172.119	P	183.17	A	131.705	A	106.387	P	127.739	P	145.776	LOC_Os02g44510.1	UDP-glucose glycoprotein glucosyltransferase 1 precursor, putative, expressed
Os000400_01	A	129.126	P	181.913	P	187.21	P	658.943	P	709.264	P	730.576	P	559.088	P	830.282	P	704.471	P	323.902	P	359.53	P	390.38	P	303.132	P	346.553	P	408.34	P	403.647	P	457.032	P	412.821	-	-
Os000403_01	P	495.438	P	320.521	P	316.283	P	1094	P	736.219	P	1329.61	P	1033.58	P	1069.97	P	633.589	P	653.536	P	878.741	P	785.437	P	452.412	P	472.975	P	445.337	P	504.256	P	546.922	P	516.928	LOC_Os12g08260.2	dehydrogenase E1 component domain containing protein, expressed
Os000405_01	A	83.4407	A	87.2649	A	83.8288	P	377.154	P	303.799	P	213.027	P	243.505	P	250.222	P	298.17	P	203.718	P	194.554	P	217.581	P	260.042	P	194.77	P	203.116	P	189.662	P	215.17	P	234.16	LOC_Os07g06950.1	ubiquitin carboxyl-terminal hydrolase, putative, expressed
Os000406_01	P	5034.91	P	3553.06	P	1254.5	P	652.803	P	789.588	P	743.079	P	956.245	P	1421.78	P	1697.07	P	663.06	P	623.448	P	548.166	P	480.231	P	423.374	P	470.08	P	515.636	P	556.983	P	550.244	LOC_Os07g10720.2	40S ribosomal protein S15a, putative, expressed
Os000408_01	A	83.4006	A	54.3026	A	71.4523	P	300.642	P	285.477	P	219.892	P	246.474	P	225.691	P	236.617	P	131.67	P	167.873	P	163.201	A	57.2202	A	79.1377	P	137.227	P	245.261	P	254.045	P	184.155	LOC_Os06g37160.1	transmembrane 9 superfamily member, putative, expressed
Os000411_01	A	120.199	A	83.5142	A	81.278	P	240.308	P	208.611	A	142.953	P	157.498	P	179.235	P	222.426	A	65.5883	A	80.2701	A	73.9155	A	42.3041	A	34.4718	A	36.8623	A	64.9996	A	84.9592	A	95.7575	LOC_Os03g17084.1	Core histone H2A/H2B/H3/H4 domain containing protein, putative
Os000413_01	A	56.8747	A	52.5882	A	57.0239	P	276.55	P	238.908	A	181.77	A	91.4719	A	105.5	A	119.716	A	48.686	A	42.4379	A	59.2618	A	1.55869	A	6.8242	A	12.1141	A	45.3299	A	56.328	A	57.787	-	-
Os000415_01	P	310.686	P	260.349	P	174.953	P	534.152	P	397.529	P	431.209	P	329.033	P	413.078	P	388.419	P	295.389	P	409.211	P	563.306	P	334.727	P	305.047	P	270.259	P	189.378	P	228.927	P	257.812	LOC_Os03g10510.1	outer mitochondrial membrane porin, putative, expressed
Os000416_01	P	234.234	P	238.229	P	223.298	P	1086.85	P	756.584	P	1111.54	P	791.973	P	1304.28	P	764.669	P	369.611	P	700.139	P	642.637	P	698.06	P	579.256	P	717.289	P	581.051	P	693.118	P	456.924	LOC_Os08g39450.1	AN1-like zinc finger domain containing protein, expressed
Os000417_01	P	666.646	P	808.925	P	1001.34	P	711.309	P	602.263	P	479.693	P	673.982	P	711.438	P	672.514	P	1241.7	P	1337.36	P	1242	P	1197.86	P	988.426	P	1004.83	P	1113.07	P	1394.06	P	1147.44	LOC_Os02g56250.1	GATA zinc finger domain containing protein, expressed
Os000418_01	A	118.585	A	95.3093	A	115.056	P	904.885	P	425.5	P	740.904	P	405.772	P	1368.03	P	644.934	P	559.567	P	591.371	P	749.416	P	652.109	P	668.743	P	454.815	P	429.35	P	443.283	P	702.082	LOC_Os02g47600.2	soluble inorganic pyrophosphatase, putative, expressed
Os000421_01	A	119.221	P	158.941	P	149.734	P	535.409	P	600.194	P	586.015	P	614.378	P	465.654	P	413.94	P	261.242	P	419.782	P	492.195	P	363.968	P	294.535	P	276.376	P	292.554	P	290.884	P	290.972	LOC_Os03g32314.1	allene oxide cyclase 4, chloroplast precursor, putative, expressed
Os000422_01	P	1775.94	P	1445.02	P	731.513	P	883.91	P	912.787	P	726.597	P	1140.59	P	862.401	P	761.93	P	845.012	P	714.857	P	848.581	P	691.978	P	597.462	P	390.772	P	810.19	P	635.08	P	956.704	LOC_Os01g65550.2	RNA recognition motif containing protein, putative, expressed
Os000423_01	A	98.5728	A	119.082	A	141.786	P	528.433	P	469.781	P	326.567	P	322.564	P	608.912	P	519.37	P	250.623	P	288.574	P	310.169	P	455.383	P	430.992	P	488.095	P	251.932	P	368.582	P	420.388	LOC_Os02g52860.1	phosphate carrier protein, mitochondrial precursor, putative, expressed
Os000424_01	P	236.283	A	163.852	A	88.0048	P	212.866	P	204.588	P	165.856	P	233.148	P	223.685	P	303.91	A	100.583	A	105.526	A	120.173	A	73.114	A	70.3958	P	144.994	A	93.9825	P	137.187	A	126.612	LOC_Os03g21080.1	guanine nucleotide exchange factor, putative, expressed
Os000427_01	A	74.9758	A	63.5956	A	63.2481	P	232.295	P	222.401	P	227.654	P	196.365	P	183.681	P	203.823	P	137.321	P	150.246	P	150.892	A	49.3427	A	61.997	P	122.004	A	91.9296	A	129.434	P	164.216	LOC_Os01g10840.1	CGMC_GSK.2 - CGMC includes CDA, MAPK, GSK3, and CLKC kinases, expressed
Os000428_01	A	161.62	P	215.971	P	211.113	P	1719.7	P	1783.29	P	1373.16	P	1295.22	P	1344.84	P	1468.35	P	1024.99	P	942.336	P	1165.82	P	744.116	P	739.224	P	535.843	P	532.878	P	549.947	P	708.805	LOC_Os04g33080.3	protein phosphatase 2C, putative, expressed
Os000429_01	A	81.1244	A	82.0175	A	80.507	P	507.466	P	327.643	P	340.191	P	256.285	P	665.128	P	300.581	P	204.928	P	338.411	P	321.492	P	293.206	P	517.879	P	1018.92	P	248.024	P	537.056	P	254.715	LOC_Os01g68770.1	selenium-binding protein, putative, expressed
Os000431_01	P	3507.69	P	6074.29	P	7114.33	P	35637.6	P	54542.8	P	58712.7	P	21992.9	P	19448.3	P	33750.3	P	32262.5	P	36194	P	34918.9	P	20109.7	P	18880.8	P	30011	P	5047.91	P	11795.1	P	26743.9	LOC_Os01g68300.1	expressed protein
Os000432_01	P	441.724	P	394.443	P	248.491	P	442.032	P	629.919	P	522.772	P	575.41	P	410.818	P	558.872	P	511.302	P	545.044	P	513.592	P	199.598	P	184.351	P	198.35	P	475.282	P	557.322	P	701.922	LOC_Os03g22880.1	nucleolar protein 5A, putative, expressed
Os000434_01	P	217.421	P	188.757	P	183.459	P	528.31	P	530.372	P	650.726	P	371.576	P	370.419	P	374.976	P	310.073	P	350.593	P	385.039	P	372.431	P	346.353	P	340.632	P	299.085	P	309.527	P	299.684	LOC_Os08g09200.1	aconitate hydratase protein, putative, expressed
Os000435_01	P	1683.87	P	1922.48	P	2753.34	P	1181.64	P	825.849	P	452.527	P	932.396	P	960.183	P	1057.95	P	2710.53	P	3199.39	P	3404.86	P	1903.75	P	2046.57	P	2109.07	P	2723.68	P	2955.02	P	3036.64	LOC_Os04g39150.1	pathogenesis-related Bet v I family protein, putative, expressed
Os000436_01	P	136.637	A	114.068	A	93.0061	P	228.191	P	259.1	P	259.36	P	285.765	P	183.138	P	234.304	P	107.188	A	128.896	A	144.468	A	78.2177	A	100.597	A	108.559	A	83.2648	P	159.546	A	146.035	LOC_Os06g47320.1	T-complex protein, putative, expressed
Os000437_01	P	868.615	P	623.235	P	484.947	P	268.073	P	255.927	P	206.241	P	348.632	P	379.509	P	390.856	P	120.872	A	119.318	P	112.329	A	90.8498	A	93.4283	P	131.883	P	137.429	P	162.205	P	193.065	LOC_Os06g48160.1	glycosyl hydrolases family 16, putative, expressed
Os000438_01	A	64.3906	A	55.4511	A	46.8062	P	224.19	A	263.38	P	141.979	A	123.208	P	168.423	P	170.116	A	36.3701	A	47.698	A	55.1414	A	16.6459	A	13.6435	A	3.72762	A	67.9436	A	80.6599	A	72.1452	LOC_Os12g03390.1	OsFBX435 - F-box domain containing protein, expressed
Os000439_01	P	170.892	P	204.32	A	162.06	P	289.723	P	279.17	P	209.507	P	191.906	P	182.533	P	195.994	P	266.986	P	257.484	P	239.317	P	158.492	P	157.136	A	117.482	P	247.625	P	258.684	P	283.853	LOC_Os02g57110.1	GDSL-like lipase/acylhydrolase, putative, expressed
Os000440_01	P	312.983	P	282.716	P	222.27	P	441.473	P	361.858	P	499.634	P	446.818	P	620.798	P	496.595	P	246.039	P	356.696	P	322.589	P	200.756	P	231.681	P	305.44	P	319.803	P	369.555	P	299.063	LOC_Os04g52090.1	AP2 domain containing protein, expressed
Os000442_01	P	3198.95	P	2648.14	P	724.54	P	368.75	P	414.799	P	417.491	P	629.423	P	583.7	P	737.464	A	108.67	P	125.541	P	139.974	A	100.313	A	95.2542	A	75.3639	P	117.163	P	135.371	P	234.191	LOC_Os03g01320.1	LTPL116 - Protease inhibitor/seed storage/LTP family protein precursor, expressed
Os000443_01	P	202.319	P	163.247	P	205.884	P	1585.86	P	843.325	P	1319.72	P	1288.5	P	1122.18	P	1141.63	P	961.439	P	909.572	P	1392.59	P	844.235	P	650.065	P	752.605	P	699.999	P	480.657	P	449.762	-	-
Os000445_01	P	145.708	A	155.704	A	109.309	P	1185.8	P	1567.57	P	1567.63	P	2272.21	P	733.146	P	707.109	P	808.85	P	1687.41	P	1849.57	P	1321.09	P	879.28	P	895.986	P	517.017	P	875.559	P	449.403	LOC_Os01g37910.1	vacuolar-processing enzyme precursor, putative, expressed
Os000446_01	P	191.119	P	186.354	P	140.878	P	561.675	P	448.579	P	247.209	P	666.304	P	359.091	P	378.749	P	245.353	P	229.13	P	390.827	P	310.568	P	208.903	A	116.689	P	632.244	P	484.289	P	389.362	-	-
Os000447_01	A	73.9165	A	62.4703	A	70.5175	P	256.458	A	184.471	A	89.986	A	93.9997	A	97.8212	P	108.228	A	70.1096	A	97.5401	A	98.4296	A	36.2257	A	50.2939	A	54.9187	A	124.639	P	119.625	A	103.675	LOC_Os10g36390.1	monocopper oxidase, putative
Os000448_01	P	106.767	A	88.0852	A	70.0783	P	217.829	P	203.284	P	155.47	P	154.926	P	172.138	P	209.311	A	78.8675	A	100.532	A	92.6927	A	44.6917	A	45.7706	A	57.9765	A	86.1677	A	137.788	A	146.17	LOC_Os04g40370.2	OsFBX142 - F-box domain containing protein, expressed
Os000453_01	A	57.0672	A	51.8732	A	56.2225	P	366.204	P	376.495	P	347.715	P	233.027	P	302.305	P	282.102	P	182.613	P	232.532	P	260.09	P	156.407	P	242.623	P	438.835	P	206.029	P	330.485	P	394.06	LOC_Os03g14310.1	expressed protein
Os000458_01	P	265.331	P	279.964	A	111.789	P	427.582	P	491.98	P	509.566	P	280.087	P	261.054	P	278.286	P	252.063	P	263.06	P	238.29	P	306.264	P	220.682	P	173.503	P	187.663	P	189.921	P	299.733	LOC_Os12g04260.1	astaxanthin synthase KC28, putative
Os000462_01	P	224.017	A	142.533	A	95.1574	P	240.676	P	212.672	P	174.677	A	185.738	P	180.102	P	185.201	A	43.4401	A	72.1652	A	85.235	A	2.86267	A	23.0143	A	42.9508	A	100.442	A	88.2616	A	61.7967	LOC_Os05g12140.1	Leucine Rich Repeat family protein, expressed
Os000463_01	A	100.276	A	73.6564	A	57.4637	P	179.772	A	266.684	A	122.163	A	89.5077	A	91.1279	A	99.6319	A	34.7075	A	43.6568	A	54.1821	A	-2.2628	A	12.7161	A	8.82118	A	60.5136	A	63.9392	A	85.6747	LOC_Os04g35210.1	Leucine Rich Repeat family protein, expressed
Os000476_01	A	77.1304	A	50.1475	A	62.0714	P	246.348	P	240.134	P	137.984	P	134.863	P	156.684	P	158.198	A	69.8031	A	84.2085	A	92.4202	A	31.4312	A	35.4166	A	33.2703	A	63.8002	A	46.5608	A	83.8305	-	-
Os000479_01	P	155.999	A	105.628	A	87.9487	P	206.517	P	204.643	P	147.693	P	167.803	A	106.56	A	126.827	A	73.5815	A	93.4266	A	80.308	A	56.6675	A	68.7196	A	68.2755	A	190.913	P	112.34	A	127.751	-	-
Os000480_01	A	118.521	P	161.377	P	115.846	P	440.875	P	425.414	P	514.436	P	395.989	P	533.351	P	371.236	P	216.312	P	250.473	P	271.665	P	405.555	P	335.78	P	248.403	P	178.613	P	254.052	P	329.551	LOC_Os08g15170.1	ATP synthase epsilon chain, mitochondrial, putative, expressed
Os000481_01	P	145.194	P	160.261	P	153.207	P	265.332	P	227.817	P	223.106	P	172.435	P	208.215	P	232.893	A	107.854	A	126.075	P	142.745	A	65.9117	A	81.4827	A	90.8737	P	163.497	P	180.797	P	166.864	-	-
Os000484_01	P	749.535	P	1016.42	P	1049.56	P	3111.36	P	2938.54	P	2581.82	P	3260.96	P	2374.02	P	2566.88	P	2387.53	P	3488.9	P	3730.42	P	2771.7	P	2375.18	P	1858.52	P	2461.3	P	1853.97	P	1862.66	LOC_Os05g38560.1	Core histone H2A/H2B/H3/H4 domain containing protein, putative
Os000485_01	A	118.698	A	102.383	A	103.131	P	1025.77	P	823.649	P	811.743	P	494.248	P	591.296	P	630.909	A	232.611	P	289.889	P	280.772	P	318.354	P	327.196	P	239.135	P	306.449	P	272.548	P	252.958	LOC_Os06g20250.1	retrotransposon protein, putative, unclassified
Os000489_01	A	61.7589	A	71.5767	A	65.5381	P	200.539	P	238.194	P	130.093	P	143.565	A	112.014	A	101.326	A	22.1573	A	24.9132	A	35.2149	A	-4.65708	A	-0.103699	A	16.1591	A	63.629	A	71.2751	A	71.7904	LOC_Os11g01740.2	serine/threonine-protein kinase, putative, expressed
Os000492_01	A	94.5394	A	63.8229	A	70.4422	P	188.348	A	159.083	A	95.9502	A	124.205	A	156.148	P	204.592	A	52.6321	A	83.1997	A	88.5728	A	37.3832	A	39.7214	A	36.8743	A	87.1917	P	111.141	A	107.971	LOC_Os11g31110.1	expressed protein
Os000504_01	P	116.396	A	103.589	A	72.9445	P	254.491	P	248.149	A	229.729	P	230.688	P	217.044	P	217.377	A	89.3598	A	122.998	A	125.76	A	56.346	A	46.7822	A	64.8684	P	144.661	P	147.826	A	111.673	LOC_Os07g12520.1	zinc ion binding protein, putative, expressed
Os000505_01	P	156.261	P	246.562	P	349.52	P	423.904	P	362.234	P	315.796	P	320.257	P	451.249	P	252.657	P	303.325	P	351.597	P	447.032	P	602.009	P	562.446	P	425.661	P	394.753	P	350.84	P	482.459	LOC_Os04g33630.1	2Fe-2S iron-sulfur cluster binding domain containing protein, expressed
Os000507_01	P	360.12	P	354.235	P	356.125	P	1118.85	P	1101.2	P	1064.33	P	1621.32	P	1450.04	P	1341.12	P	837.991	P	932.556	P	1051.39	P	849.434	P	856.449	P	724.165	P	693.285	P	740.999	P	1079.04	LOC_Os11g41875.1	membrane protein, putative, expressed
Os000508_01	A	79.6929	A	87.7841	A	110.573	P	325.496	P	247.452	P	331.371	P	204.224	P	280.102	P	185.766	A	113.245	P	160.417	P	247.172	A	83.86	P	133.142	P	203.157	P	190.369	P	197.636	P	164.703	-	-
Os000510_01	P	176.713	A	142.676	A	104.94	P	334.926	P	295.348	P	350.379	P	310.894	P	245.916	P	263.212	P	112.23	P	156.047	P	212.462	A	75.355	A	104.463	A	138.76	P	149.783	A	128.347	A	115.597	LOC_Os12g29550.1	expressed protein
Os000511_01	P	296.201	P	289.448	P	314.582	P	277.224	P	248.753	P	171.758	P	225.719	P	215.358	P	236.363	A	121.473	A	92.8113	A	92.8015	A	68.2271	A	72.7249	A	52.2229	P	108.101	A	116.297	P	125.753	-	-
Os000513_01	A	73.9238	A	70.4986	A	74.8685	P	329.369	P	361.938	P	286.968	P	281.822	P	310.662	P	266.631	A	110.354	P	218.783	P	222.597	P	174.658	A	124.865	A	92.3117	A	105.262	P	147.263	P	164.05	LOC_Os02g38900.1	cytosolic Fe-S cluster assembling factor NBP35, putative, expressed
Os000515_01	P	302.041	P	187.828	P	253.199	P	1553.9	P	746.227	P	813.325	P	705.824	P	1417.58	P	1256.81	P	730.517	P	770.223	P	887.748	P	925.44	P	1175.64	P	1065.81	P	941.547	P	946.587	P	986.626	LOC_Os02g03010.1	expressed protein
Os000517_01	P	286.719	P	197.499	P	160.911	P	229.845	P	227.072	P	152.546	A	208.768	P	238.633	P	429.594	A	45.7769	A	50.5744	A	58.5896	A	24.3719	A	24.1912	A	19.2935	A	72.8399	A	58.3201	A	83.4667	LOC_Os01g08690.1	holocarboxylase synthetase, putative, expressed
Os000523_01	A	63.1094	A	47.749	A	46.6562	P	209.845	P	237.532	A	87.6884	A	64.9626	A	86.071	P	147.822	A	39.8308	A	33.3633	A	45.0836	A	17.2221	A	9.95224	A	2.39908	A	65.0554	A	54.4666	A	63.8301	-	-
Os000524_01	P	733.005	P	764.702	P	911.725	P	929.786	P	737.095	P	432.055	P	574.813	P	624.911	P	728.891	P	1127.87	P	1004.95	P	924.282	P	1416.7	P	1245.12	P	995.854	P	783.478	P	900.785	P	1175.8	-	-
Os000527_01	A	69.7718	A	71.4413	A	63.6332	P	237.897	P	203.654	A	1402.69	A	139.142	A	112.013	P	146.181	A	60.9745	A	63.8774	A	64.9886	A	37.5565	A	62.295	A	71.256	A	78.8327	A	88.8093	A	70.9353	LOC_Os02g26960.1	expressed protein
Os000528_01	P	2920.79	P	2086.73	P	1788.8	P	893.229	P	715.76	P	575.949	P	1436.87	P	1531.34	P	1753.14	P	2125.03	P	1722.56	P	1357.74	P	1381.21	P	1138.72	P	877.291	P	1003.76	P	945.844	P	966.173	LOC_Os05g36970.1	DUF623 domain containing protein, expressed
Os000530_02	P	187.288	P	189.489	P	175.973	P	277.85	P	333.687	P	215.119	P	225.427	P	207.439	P	194.742	P	203.722	P	224.481	P	196.536	P	182.849	P	193.543	A	138.322	P	228.682	P	227.434	P	242.434	-	-
Os000532_01	P	154.602	P	180.426	A	125.13	P	273.711	P	247.686	P	193.952	P	164.838	P	158.982	P	196.078	P	303.168	P	317.787	P	263.276	P	218.411	P	316.019	P	389.335	P	183.868	P	241.953	P	281.116	LOC_Os03g18490.1	RPGR, putative, expressed
Os000533_01	P	133.366	P	140.571	P	141.125	P	399.925	P	351.124	P	439.027	P	297.028	P	358.469	P	342.955	P	205.004	P	305.222	P	336.117	P	253.361	P	229.959	P	280.211	P	249.727	P	278.415	P	250.594	LOC_Os06g10760.1	emp24/gp25L/p24 family protein, putative, expressed
Os000537_01	A	89.3221	A	77.2728	A	68.4703	P	182.543	A	144.696	A	123.477	P	179.354	P	200.067	P	144.535	A	35.1278	A	48.2851	A	66.0332	A	1.06082	A	20.1596	A	27.6167	A	103.206	A	98.6747	A	84.4057	LOC_Os12g23150.1	4-nitrophenylphosphatase-like, putative, expressed
Os000538_01	P	14305.1	P	14962.9	P	17664.2	P	16047.2	P	13733.2	P	12601.9	P	18884.2	P	15986.4	P	13538.3	P	27569.2	P	26854.6	P	25690.4	P	16407.8	P	16143.6	P	17996.1	P	20454.3	P	24825.2	P	23707.7	LOC_Os11g40400.1	protein kinase, putative, expressed
Os000539_01	P	136.289	P	217.57	P	192.876	P	289.078	P	303.631	P	212.192	P	249.025	P	236.781	P	264.501	P	269.767	P	246.231	P	234.259	P	275.577	P	240.061	P	236.907	P	228.428	P	242.354	P	327.62	LOC_Os06g15370.1	peptide transporter PTR2, putative, expressed
Os000540_01	P	300.278	P	257.566	P	200.995	P	335.687	P	293.883	P	191.78	P	205.252	P	244.002	P	248.758	P	169.213	P	135.127	P	118.847	P	130.629	P	148.551	A	104.367	P	171.608	P	176.736	P	237.799	LOC_Os09g32470.1	membrane protein, putative, expressed
Os000542_01	P	46297.8	P	48592.3	P	49215.9	P	52029.2	P	56743.8	P	63328.7	P	62197.7	P	58419.2	P	62162.1	P	64212.5	P	57443.3	P	45419.9	P	57339.1	P	56860.1	P	54400.5	P	61232.5	P	62049	P	64041.4	LOC_Os04g39100.1	peroxidase precursor, putative, expressed
Os000543_01	P	238.034	P	216.872	P	257.611	P	1085.77	P	932.998	P	1177.03	P	387.302	P	460.345	P	570.718	P	475.485	P	503.207	P	546.25	P	513.466	P	546.221	P	519.985	P	467.291	P	364.776	P	474.429	LOC_Os01g56890.1	expressed protein
Os000544_01	P	1280.89	P	1649.31	P	2090.91	P	1986.56	P	1610.76	P	1247.98	P	1062.8	P	1084.41	P	1511.25	P	2403.63	P	2010.93	P	1778.32	P	1879.29	P	1993.77	P	1781.69	P	1547.18	P	1750.89	P	1981.38	LOC_Os11g37990.1	chloroplastic group IIA intron splicing facilitator CRS1, chloroplast precursor, putative, expressed
Os000545_01	P	113.227	A	83.7866	A	62.5861	P	153.967	P	200.372	A	121.383	P	130.124	P	168.658	P	221.874	A	47.7086	A	57.2409	A	60.8212	A	24.7842	A	26.9177	A	20.2224	A	93.9829	A	89.0317	A	84.2313	LOC_Os05g10620.1	no apical meristem protein, putative, expressed
Os000547_01	P	8564.43	P	5387.77	P	3936.2	P	1018.75	P	1137.22	P	1157.09	P	3138.24	P	3211.06	P	3624	P	1021.88	P	817.064	P	600.434	P	706.473	P	639.052	P	602.523	P	1393.67	P	1325.97	P	1482.57	LOC_Os11g01320.1	expressed protein
Os000548_01	P	272.675	A	220.292	A	210.05	P	1184.01	P	1406.5	P	1513.68	P	704.643	P	745.695	P	954.088	P	750.704	P	851.461	P	1222.41	P	606.835	P	634.888	P	496.212	P	398.197	P	280.491	P	558.767	LOC_Os07g09040.1	peptidyl-prolyl cis-trans isomerase, FKBP-type, putative, expressed
Os000549_01	A	134.75	P	174.097	A	136.139	P	414.175	P	360.623	P	326.589	P	214.037	P	252.2	P	254.442	P	185.369	P	184.645	P	281.402	P	185.096	P	180.394	A	122.921	P	299.695	P	183.162	P	213.506	LOC_Os05g41580.1	calcium-transporting ATPase, plasma membrane-type, putative, expressed
Os000550_01	P	2204	P	1451.91	P	1015.33	P	349.01	P	331.719	P	263.328	P	1365.11	P	1236.92	P	1526.16	P	127.369	P	134.451	P	125.833	A	79.8125	A	85.3524	A	89.2907	A	123.765	P	142.253	P	200.893	LOC_Os11g32090.1	geranylgeranyl transferase type-2 subunit beta, putative
Os000551_01	P	382.389	P	311.898	P	206.405	P	238.88	P	231.132	P	251.826	A	336.156	A	280.901	P	427.248	A	48.3132	A	106.228	A	132.726	A	25.1815	A	38.9774	A	35.8179	A	98.1767	A	107.304	A	97.0331	LOC_Os01g59730.1	ribosomal protein L7Ae, putative, expressed
Os000555_01	A	88.4982	A	84.0448	A	70.8226	P	213.841	P	204.642	P	183.9	P	169.112	P	228.337	A	163.24	A	53.4613	A	79.6123	A	87.6302	A	37.8813	A	39.582	A	46.4919	A	115.04	P	124.178	A	118.612	LOC_Os05g33270.1	GDSL-like lipase/acylhydrolase, putative, expressed
Os000556_01	A	73.4331	A	95.545	A	90.7263	P	245.443	P	230.08	P	226.318	P	290.576	P	313.331	P	234.066	P	142.688	A	113.946	P	154.234	P	159.945	A	105.854	A	104.95	P	145.234	P	182.897	P	237.88	LOC_Os06g50030.1	CAMK_CAMK_like.30 - CAMK includes calcium/calmodulin depedent protein kinases, expressed
Os000560_01	A	88.3927	A	90.2494	A	72.9526	P	275.91	P	357.9	P	240.396	P	237.741	P	324.259	P	234.044	A	109.561	P	184.156	P	174.728	A	137.436	P	138.909	A	94.5458	P	135.31	A	124.051	A	92.9416	LOC_Os08g41470.2	proteophosphoglycan ppg4, putative, expressed
Os000561_01	A	80.3058	A	62.2691	A	61.3165	P	249.871	P	224.201	P	191.638	P	182.304	P	244.065	P	160.237	A	64.8501	A	110.461	A	139.168	A	138.906	A	115.83	P	142.302	P	167.322	P	151.498	A	126.861	LOC_Os09g37710.2	NIN, putative, expressed
Os000563_01	P	351.683	P	249.896	A	123.043	P	219.22	P	241.183	P	196.207	P	269.848	P	244.913	P	348.765	A	81.262	A	57.9575	A	74.4227	A	26.2973	A	32.1269	A	32.7844	A	55.8915	A	90.5524	A	70.2237	LOC_Os09g34090.2	sterol-4-alpha-carboxylate 3-dehydrogenase, decarboxylating, putative, expressed
Os000568_01	A	75.3324	A	55.7518	A	62.0927	P	261.963	A	200.572	A	95.0609	A	104.198	A	110.589	P	178.342	A	55.5833	A	42.9647	A	56.161	A	24.2242	A	18.7146	A	20.0202	A	71.1142	A	96.6109	A	75.8238	LOC_Os11g06930.1	CBS domain-containing protein, putative, expressed
Os000569_01	A	47.7592	A	54.1959	A	61.1481	P	248.118	P	235.526	A	160.182	A	100.465	P	151.312	P	177.475	A	64.0099	A	63.2922	A	81.8633	A	41.9919	A	48.8248	A	28.8576	A	71.1541	A	87.6914	A	101.444	LOC_Os07g14310.1	expressed protein
Os000575_01	P	458.313	P	352.149	P	333.763	P	648.38	P	505.51	P	448.643	P	333.401	P	530.574	P	459.906	P	418.589	P	369.688	P	415.894	P	497.81	P	462.713	P	311.944	P	507.416	P	452.957	P	552.14	LOC_Os11g20160.1	O-methyltransferase, putative, expressed
Os000576_01	A	84.0244	A	100.517	A	94.5861	P	161.966	P	273.538	P	184.731	P	150.21	A	163.956	P	163.84	A	55.0561	A	65.1182	A	78.0703	A	28.9912	A	41.1033	A	38.2548	A	111.085	P	95.7456	P	128.994	LOC_Os06g05420.1	expressed protein
Os000580_01	A	154.558	A	149.558	A	107.013	P	184.508	P	197.073	P	176.729	A	189.639	P	236.243	P	269.284	A	43.3999	A	60.3723	A	66.6608	A	12.382	A	23.5172	A	29.1228	A	71.4673	A	89.2013	A	68.8564	LOC_Os08g33810.1	lipoate protein ligase, putative, expressed
Os000583_01	P	255.863	P	246.151	P	164.278	P	534.063	P	499.346	P	368.24	P	555.984	P	421.605	P	386.696	P	350.708	P	421.617	P	561.526	P	380.67	P	317.415	P	312.868	P	574.617	P	418.94	P	354.078	LOC_Os02g14860.1	prefoldin subunit, putative, expressed
Os000584_01	P	281.695	P	284.549	P	324.777	P	604.246	P	616.459	P	533.592	P	394.094	P	515.791	P	526.159	P	419.816	P	525.455	P	599.926	P	656.994	P	602.423	P	531.591	P	623.402	P	674.524	P	609.614	LOC_Os10g34270.1	expressed protein
Os000585_02	P	10409.1	P	9338.84	P	3717.45	P	876.045	P	643.817	P	438.481	P	1488.37	P	2183.32	P	2170.15	P	515.355	P	552.686	P	403.413	P	442.316	P	407.568	P	329.555	P	785.364	P	752.287	P	904.008	-	-
Os000586_01	P	260.947	P	246.839	A	109.776	P	305.492	P	332.492	P	265.416	P	314.864	P	214.887	P	262.971	P	141.823	P	124.043	A	137.3	A	71.7617	A	84.848	A	43.3051	A	72.2091	A	91.007	A	102.312	LOC_Os09g11510.1	phosphoglycerate mutase, putative, expressed
Os000587_01	P	3554	P	3665.82	P	3448.95	P	2826	P	2616.22	P	2002.24	P	2046.64	P	2323.56	P	2780.11	P	3876.39	P	4272.09	P	4119.39	P	3169.15	P	2944.84	P	2594.27	P	2391.5	P	2713.32	P	3154.16	LOC_Os02g54820.2	trehalose-6-phosphate synthase, putative, expressed
Os000589_01	P	1402.67	P	1313.07	P	1178.41	P	914.641	P	625.835	P	334.953	P	768.185	P	784.707	P	748.311	P	2043.92	P	1815.78	P	1730.3	P	1655.36	P	1366.73	P	1115.63	P	1225.19	P	1320.93	P	1275.98	LOC_Os09g30350.1	expressed protein
Os000590_01	A	102.774	A	76.5441	A	75.5754	P	262.601	A	237.706	A	111.222	P	176.267	P	217.651	P	218.823	A	68.7389	A	88.4885	A	62.0491	A	29.382	A	61.5341	A	110.998	A	96.7464	A	108.004	A	84.7748	LOC_Os05g03590.1	expressed protein
Os000594_01	A	116.671	A	150.69	A	85.8174	P	453.345	P	577.982	P	287.664	P	186.067	P	242.948	P	218.855	A	157.685	A	64.0062	A	53.4406	P	292.507	P	118.039	A	36.8157	A	107.979	A	87.6191	A	136.383	LOC_Os04g29550.1	RIPER2 - Ripening-related family protein precursor, expressed
Os000597_01	P	138.978	A	95.2098	A	63.0494	P	235.495	P	289.603	P	259.777	P	194.7	P	597.332	P	299.615	A	50.8527	P	290.632	P	355.276	A	18.9334	A	76.1363	A	51.3126	P	218.587	P	273.755	P	253.836	LOC_Os01g72460.1	NADPH quinone oxidoreductase, putative, expressed
Os000598_01	P	980.503	P	994.868	P	646.661	P	193.848	P	282.046	A	235.351	P	377.71	P	442.505	P	620.533	A	56.0566	A	77.0612	A	84.2345	A	16.0146	A	48.8752	A	62.2981	P	138.881	P	127.471	P	144.293	LOC_Os07g10400.1	pentatricopeptide, putative, expressed
Os000602_01	A	77.1364	A	69.5835	A	66.7301	P	218.424	P	270.454	P	266.308	P	214.09	P	213.364	P	196.138	A	90.9706	A	175.447	A	132.143	A	88.4034	A	73.1222	A	76.153	A	99.052	P	166.367	A	120.641	LOC_Os03g44800.1	DUF593 domain containing protein, expressed
Os000604_01	P	318.708	P	324.745	P	316.665	P	172.545	P	270.095	A	216.177	P	272.398	P	329.458	P	408.103	A	55.8456	A	76.0425	A	80.0409	A	26.8583	A	52.3152	A	55.4221	A	136.06	P	106.612	A	118.568	LOC_Os06g43020.1	expressed protein
Os000607_01	P	587.263	P	536.875	P	323.183	P	523.741	P	362.723	P	247.164	P	301.429	P	440.773	P	481.699	P	277.563	P	248.548	P	232.554	P	245.559	P	256.197	P	223.575	P	199.198	P	260.532	P	283.833	-	-
Os000608_01	P	730.14	P	595.908	P	576.735	P	608.102	P	446.353	P	365.474	P	625.143	P	734.648	P	700.921	P	834.883	P	909.046	P	902.753	P	645.408	P	637.799	P	609.382	P	596.495	P	658.227	P	747.434	LOC_Os05g23130.1	expressed protein
Os000609_01	A	60.8227	A	67.4632	A	62.3751	P	278.699	P	289.053	P	248.839	P	267.02	P	240.505	P	228.469	P	145.932	P	152.295	P	159.993	A	59.983	A	69.1129	A	65.2163	A	104.061	A	113.17	A	96.524	LOC_Os04g32880.2	CBS domain containing membrane protein, putative, expressed
Os000610_01	A	74.6476	A	60.4891	A	55.0915	P	148.243	P	215.624	P	143.845	A	128.053	P	143.038	P	166.481	A	38.133	A	45.0828	A	56.4705	A	26.6693	A	34.7661	A	13.1393	A	55.8427	A	85.9302	A	82.0414	LOC_Os04g42990.1	suppressor of stem-loop protein 1, putative, expressed
Os000613_01	P	19855.5	P	16323.9	P	12347	P	7815.7	P	7128.56	P	6320.92	P	11718.5	P	11144.8	P	11661.9	P	13158.1	P	12274.2	P	11541.7	P	10954.9	P	10566.5	P	11522.4	P	7749.8	P	9566.16	P	10157.5	-	-
Os000616_01	P	5564.46	P	4121.93	P	2005.24	P	1649.14	P	1414.39	P	1240.38	P	2218.16	P	1975.74	P	2063.35	P	3509.82	P	3505.36	P	3158.53	P	2418.3	P	2204.16	P	2003.01	P	2347.03	P	2519.42	P	2856.81	LOC_Os05g34854.2	gibberellin 20 oxidase 2, putative, expressed
Os000618_01	P	428.131	P	378.157	P	546.365	P	1490.11	P	851.45	P	1056.18	P	534.311	P	792.679	P	844.456	P	345.575	P	485.13	P	642.033	P	476.701	P	573.197	P	702.571	P	697.319	P	707.357	P	519.165	LOC_Os05g45730.1	ubiquinone oxidoreductase, putative, expressed
Os000619_01	P	649.641	P	533.81	P	289.205	P	358.54	P	367.936	P	297.618	P	309.376	P	271.306	P	233.746	P	232.143	P	265.814	P	302.959	P	227.759	P	210.533	A	183.7	P	225.287	P	217.567	P	329.405	LOC_Os08g13840.2	OsWRKY44 - Superfamily of TFs having WRKY and zinc finger domains, expressed
Os000622_01	P	200.678	P	331.338	P	339.615	P	273.046	P	423.661	P	325.765	P	369.517	P	236.418	P	244.659	P	297.611	P	421.807	P	402.007	P	312.913	P	234.181	P	247.796	P	424.174	P	353.496	P	372.143	LOC_Os06g45390.1	expressed protein
Os000623_01	P	149.899	P	169.097	P	171.045	P	680.963	P	659.897	P	658.832	P	1034.53	P	777.471	P	388.378	P	378.783	P	768.789	P	1053.55	P	837.243	P	676.102	P	563.002	P	784.638	P	712.876	P	441.693	LOC_Os04g33440.2	DNA-binding protein S1FA, putative, expressed
Os000626_01	P	233.346	P	282.922	P	341.127	P	350.58	P	365.55	P	331.41	P	377.996	P	327.399	P	301.08	P	267.471	P	352.888	P	341.107	P	283.195	P	255.373	P	207.51	P	272.817	P	291.953	P	341.748	-	-
Os000627_01	A	58.1888	A	42.9597	A	53.1284	P	171.214	P	205.832	A	253.402	A	138.471	P	280.408	P	178.174	A	92.8817	P	218.504	P	244.584	A	89.7811	A	92.5599	A	126.971	P	167.496	P	124.274	A	107.223	LOC_Os02g58100.1	expressed protein
Os000629_01	A	93.3007	A	110.04	P	131.339	P	747.104	P	945.502	P	872.331	P	1064.64	P	928.351	P	385.417	P	464.199	P	892.431	P	1232.32	P	1218.22	P	961.261	P	606.178	P	607.993	P	524.18	P	593.985	LOC_Os08g31750.1	methyltransferase, putative, expressed
Os000635_01	A	87.7621	A	78.4484	A	67.9644	P	215.428	P	235.275	P	133.502	P	162.015	P	155.845	P	171.199	A	70.852	A	79.305	A	70.1283	A	78.4666	A	47.8298	A	23.7421	P	130.522	P	150.331	A	125.78	LOC_Os03g18300.1	chloroplast unusual positioning protein, putative, expressed
Os000636_01	A	114.534	A	89.5239	A	86.5826	P	293.58	P	205.85	P	186.562	P	197.722	P	188.554	P	214.442	A	48.8034	A	59.8182	A	70.4013	A	24.7217	A	58.3683	A	65.6185	A	95.1098	A	97.748	A	82.5914	LOC_Os11g14950.1	ACT domain containing protein, expressed
Os000642_01	P	4065.09	P	5359.43	P	4450.79	P	4972.95	P	5969.95	P	4593.99	P	5363.65	P	4571.84	P	6463.62	P	8384.43	P	8028.59	P	9157.6	P	7921.31	P	6307.29	P	5189.86	P	8367.41	P	5754.05	P	7862.33	LOC_Os06g10750.1	integral membrane protein DUF6 containing protein, expressed
Os000643_01	P	288.017	P	289.209	P	313.304	P	350.454	P	255.679	P	212.586	P	257.732	P	240.724	P	249.714	P	366.952	P	400.304	P	359.589	P	310.3	P	255.098	P	180.579	P	317.986	P	334.796	P	431.715	-	-
Os000644_02	P	449.149	P	469.444	P	422.089	P	240.055	P	270.335	P	279.923	P	374.466	P	443.485	P	563.171	P	208.372	P	256.522	P	250.932	P	199.986	A	168.621	A	146.848	P	230.379	P	224.967	P	214.886	-	-
Os000646_01	P	340.52	P	300.555	P	234.741	P	890.571	P	1877.46	P	2047.64	P	2387.16	P	1233.77	P	1076.13	P	678.99	P	1649.57	P	2650.55	P	1628.58	P	1152.5	P	1000.4	P	889.81	P	768.665	P	869.691	LOC_Os02g27490.2	bile acid sodium symporter family protein, putative, expressed
Os000649_01	P	373.315	P	298.778	P	180.316	A	93.9854	A	176.35	A	211.452	P	188.272	P	191.721	P	161.467	A	46.2332	A	49.8532	A	49.7279	A	200.491	A	140.889	A	87.0814	A	52.0601	A	71.3695	A	54.8431	-	-
Os000651_01	P	1623.91	P	1401.25	P	1420.38	P	1587.97	P	1627.02	P	1762.47	P	1725.96	P	1703.05	P	1851.84	P	3659.47	P	3829.46	P	3670.48	P	2102.18	P	1851.61	P	1766.45	P	2095.17	P	2462.27	P	2760.55	LOC_Os03g61470.1	uncharacterized Cys-rich domain containing protein, putative, expressed
Os000652_01	P	171.709	P	263.029	P	282.717	P	430.973	P	537.158	P	292.178	P	326.933	P	399.638	P	518.101	P	248.772	P	259.336	P	280.838	P	174.183	P	187.479	A	144.998	P	264.35	P	203.494	P	341.948	LOC_Os07g40630.1	BRASSINOSTEROID INSENSITIVE 1 precursor, putative, expressed
Os000653_01	P	216.848	P	206.503	P	125.851	P	173.231	P	256.605	P	164.35	P	247.199	P	231.331	P	157.984	A	67.5194	A	92.9762	A	91.7228	A	24.0128	A	37.5655	A	43.491	P	187.34	P	146.782	A	138.131	-	-
Os000654_01	A	79.9677	A	78.9564	A	93.4143	P	200.723	A	256.899	A	114.005	A	180.557	A	159.881	P	140.825	P	240.344	P	220.604	A	128.793	A	43.2577	A	56.3853	A	43.35	A	109.835	P	147.623	A	145.495	LOC_Os04g55170.1	LTPL126 - Protease inhibitor/seed storage/LTP family protein precursor
Os000656_01	A	58.926	A	61.5459	A	81.1756	P	255.75	P	236.545	P	154.461	A	125.679	P	152.18	P	178.146	A	62.4606	A	61.87	A	77.0323	A	64.228	A	48.9369	A	36.1422	A	82.5841	A	105.552	A	104.115	LOC_Os03g43880.1	PLA IIIA/PLP7, putative, expressed
Os000658_01	A	105.336	A	84.0225	A	93.1401	P	286.005	P	253.377	P	218.688	P	161.637	P	204.496	P	240.841	A	45.8644	A	68.766	A	73.7119	A	31.6276	A	37.6079	A	32.0256	A	90.9848	A	97.4912	A	86.9161	LOC_Os03g05340.1	retrotransposon protein, putative, unclassified, expressed
Os000664_01	A	87.9002	A	82.6468	A	97.5029	P	327.174	P	249.132	P	262.672	P	141.593	P	223.074	A	222.04	A	59.1611	A	107.772	A	107.988	A	33.5447	A	61.4315	A	85.654	A	108.495	A	115.534	A	101.053	LOC_Os03g52340.1	endoplasmic oxidoreductin-1 precursor, putative, expressed
Os000665_01	P	478.469	P	374.24	A	124.983	P	172.959	P	191.476	P	168.334	P	287.849	P	218.943	P	235.19	A	130.276	P	174.388	A	153.663	A	24.356	A	34.8617	A	49.5379	A	143.356	P	147.498	P	192.331	LOC_Os02g48640.1	expressed protein
Os000669_01	A	103.978	A	88.3423	A	85.7634	P	1160.36	P	757.746	P	846.159	P	695.827	P	1280.77	P	702.012	P	681.248	P	2055.77	P	2407.68	P	1535.9	P	782.964	P	1211.15	P	580.401	P	941.028	P	985.236	LOC_Os07g08970.1	uncharacterized protein ycf45, putative, expressed
Os000671_01	A	108.969	A	94.9154	A	55.8025	P	197.425	P	200.139	P	166.11	P	172.227	P	124.851	P	181.122	A	55.9082	A	71.4881	A	69.3978	A	56.6522	A	48.1351	A	36.3081	A	73.7173	A	86.8386	A	78.1376	LOC_Os02g01230.2	ribosomal protein, putative, expressed
Os000675_01	P	3601.95	P	3265.23	P	1823.05	P	12115.9	P	13432.9	P	13505.7	P	11244.1	P	9710.31	P	5074.11	P	7663.56	P	10986.6	P	14043.3	P	7788.2	P	7972.67	P	6738.95	P	10609.3	P	10229.4	P	9722.61	LOC_Os02g02830.1	ubiquitin-conjugating enzyme, putative, expressed
Os000677_01	A	73.1417	A	81.7876	A	61.3994	P	345.945	P	322.75	P	259.121	A	109.27	A	127.695	P	219.454	A	159.628	A	460.17	P	128.707	A	8.1904	A	18.1714	A	20.0716	A	351.081	P	336.952	A	141.668	LOC_Os08g18000.1	OsFBX283 - F-box domain containing protein, expressed
Os000679_01	P	895.281	P	592.322	P	201.111	P	422.907	P	451.979	P	401.227	P	797.363	P	718.365	P	676.592	P	204.967	P	210.262	P	194.756	A	135.201	P	187.187	P	198.962	P	168.403	P	175.296	P	173.028	LOC_Os01g29230.1	expressed protein
Os000682_01	A	155.811	A	131.882	A	117.808	P	319.687	P	255.209	A	112.413	P	229.68	P	270.914	P	245.161	A	25.5422	A	42.4561	A	46.1556	A	9.42256	A	2.91608	A	6.55388	A	65.3214	A	74.1595	A	70.6118	-	-
Os000683_01	P	238.565	P	216.137	P	172.173	P	381.073	P	339.32	P	295.431	P	273.289	P	324.002	P	382.946	P	306.479	P	315.197	P	295.415	P	247.407	P	252.434	P	252.795	P	320.946	P	303.391	P	308.533	-	-
Os000684_01	A	54.6658	A	48.7683	A	50.9308	P	209.397	P	219.184	A	167.23	P	222.041	P	223.069	P	184.734	A	69.9394	A	56.1554	A	64.7644	A	45.0204	A	38.4228	A	37.4487	A	91.311	A	112.688	A	121.025	-	-
Os000689_01	A	99.5019	A	97.115	A	72.502	P	880.547	P	964.933	P	922.999	P	757.374	P	794.178	P	625.05	P	504.123	P	728.958	P	640.483	P	791.698	P	632.748	P	361.005	P	429.148	P	529.413	P	579.749	LOC_Os02g32990.1	expressed protein
Os000691_01	A	42.102	A	38.331	A	52.3823	P	185.098	P	322.582	P	253.049	P	139.149	P	207.581	P	142.594	A	73.855	A	93.0757	P	104.684	A	40.9355	A	43.4422	A	49.8534	A	71.9583	A	82.9984	A	75.1492	-	-
Os000692_01	A	71.9847	A	67.6331	A	55.4408	P	382.33	P	412.499	P	309.546	P	341.439	P	323.263	P	185.112	P	176.138	P	331.952	P	353.143	P	285.724	P	242.683	A	110.087	P	199.279	P	183.803	P	172.762	LOC_Os04g32340.1	RNA-binding motif protein, putative, expressed
Os000693_01	P	42073.7	P	46019.2	P	44206.7	P	24564.2	P	23207.1	P	18441.7	P	50503.6	P	41113.2	P	38357.7	P	61308.1	P	55913.5	P	48853	P	43446.3	P	46589.7	P	46559.8	P	51735.8	P	47159.1	P	51983.8	-	-
Os000694_01	P	145.415	P	178.708	A	109.55	P	315.917	P	328.085	P	373.388	P	355.273	P	261.575	P	300.298	P	200.045	P	241.622	P	259.006	P	268.656	P	285.62	P	219.856	P	218.292	P	265.761	P	255.083	LOC_Os02g49640.1	expressed protein
Os000697_01	P	264.487	P	263.478	P	246.685	P	268.113	P	325.561	P	314.62	P	515.562	P	523.736	P	495.804	P	184.752	P	281.062	P	381.34	A	195.409	P	216.588	A	116.134	P	180.637	P	161.489	P	173.008	LOC_Os11g19700.1	cycloeucalenol cycloisomerase, putative, expressed
Os000698_01	A	55.4863	A	77.6348	A	85.5052	P	251.874	P	304.026	P	222.864	P	432.679	P	304.77	P	173.807	A	107.613	P	180.616	P	309.528	A	88.6762	A	106.707	A	71.9076	P	283.217	P	271.595	P	174.408	LOC_Os09g13440.1	expressed protein
Os000699_01	P	640.183	P	684.273	A	676.091	P	1132.5	P	1122.47	P	932.487	P	775.545	P	736.478	P	859.173	P	574.26	P	690.128	P	869.007	P	597.834	P	681.538	P	550.815	P	642.577	P	603.656	P	660.469	LOC_Os03g01150.1	palmitoyl-protein thioesterase 1 precursor, putative, expressed
Os000701_01	A	46.8352	A	87.6646	A	134.502	P	217.653	P	185.217	A	141.293	P	215.085	P	181.602	P	193.439	P	107.386	A	87.6902	A	76.2533	A	34.5352	A	47.586	A	73.8633	A	131.207	P	147.777	A	128.615	LOC_Os06g08730.1	expressed protein
Os000702_01	P	142.098	A	113.343	A	83.1122	P	196.606	P	246.76	P	135.465	P	287.578	P	241.711	P	218.844	P	109.953	A	103.947	A	88.7395	A	22.0313	A	45.2959	A	39.0603	P	271.418	P	183.107	P	212.315	LOC_Os08g41290.1	AIR12, putative, expressed
Os000707_01	P	1306.84	P	879.248	P	298.377	P	231.488	A	218.573	A	115.206	A	730.508	P	721.047	P	1064.94	P	133.44	A	111.161	A	94.3384	A	34.4094	A	49.0548	A	49.2875	A	104.755	P	185.276	A	143.138	LOC_Os02g53020.1	transposon protein, putative, CACTA, En/Spm sub-class, expressed
Os000709_01	P	252.823	P	249.39	P	249.429	P	663.985	P	595.407	P	586.66	P	610.303	P	538.169	P	464.189	P	321.276	P	415.616	P	459.05	P	307.284	P	397.86	P	416.768	P	238.964	P	352.648	P	326.413	LOC_Os07g07270.2	MBTB13 - Bric-a-Brac, Tramtrack, Broad Complex BTB domain with Meprin and TRAF Homology MATH domain, expressed
Os000710_01	P	1054.15	P	747.99	P	546.68	P	333.651	P	291.805	P	262.309	P	825.173	P	766.005	P	916.767	P	114.918	P	147.699	P	195.291	P	119.071	A	114.735	A	107.633	P	247.921	P	200.39	P	154.308	LOC_Os08g21760.1	Rer1 protein, putative, expressed
Os000712_01	P	144.417	A	108.008	A	64.6547	P	165.473	P	167.322	A	193.585	P	199.392	P	175.688	P	137.221	A	85.2142	A	99.8323	P	115.343	A	31.3611	A	29.1993	A	37.6847	P	154.584	P	142.687	A	136.104	LOC_Os01g53560.1	phosphoesterase, putative, expressed
Os000713_01	A	61.7481	A	80.2837	A	67.3407	P	342.696	P	303.533	P	292.082	P	257.779	P	261.931	P	222.855	A	164.684	P	211.989	P	222.853	A	116.487	P	172.249	P	175.979	P	189.524	P	257.447	P	283.012	LOC_Os04g40400.1	eukaryotic translation initiation factor 4B, putative, expressed
Os000715_01	A	53.154	A	62.4445	A	95.6621	P	185.991	P	266.782	P	195.746	P	171.878	P	205.488	P	153.279	A	63.6432	A	105.166	P	140.676	A	38.8275	A	51.603	A	36.3364	A	81.6062	A	88.2563	A	72.4955	LOC_Os02g44132.2	expressed protein
Os000716_01	A	65.3543	A	49.3727	A	50.296	P	178.952	P	263.205	P	123.254	P	209.485	P	184.886	A	126.096	A	41.6169	A	57.1748	A	78.566	A	14.5282	A	27.484	A	25.2817	A	91.1774	A	79.8731	A	64.822	LOC_Os11g08090.1	expressed protein
Os000718_01	P	210.286	A	148.563	A	102.419	P	176.338	P	161.283	A	148.486	A	245.542	P	217.085	P	223.563	A	56.6012	A	62.5851	A	70.4381	A	15.7372	A	25.8365	A	22.6765	A	75.0134	A	90.5301	A	80.6788	LOC_Os03g40930.1	expressed protein
Os000719_01	A	54.0674	A	48.8521	A	60.6667	P	156.702	A	325.07	A	169.743	A	81.1475	A	95.9082	P	113.209	A	39.8718	A	44.5784	A	62.2615	A	-4.99194	A	11.2618	A	8.97175	A	65.19	A	86.308	A	69.2242	LOC_Os08g42600.1	retinoblastoma-related protein-like, putative, expressed
Os000720_01	A	76.5776	A	62.6301	A	71.1809	P	325.678	P	291.88	P	428.383	P	312.455	P	382.723	P	260.561	P	247.412	P	339.704	P	475.812	P	387.813	P	420.821	P	318.605	P	267.646	P	272.139	P	244.63	LOC_Os02g32110.1	exostosin family domain containing protein, expressed
Os000722_01	A	70.1451	A	57.8366	A	54.0658	P	251.845	P	291.489	P	199.327	P	344.393	P	208.915	P	205.951	A	76.8616	A	123.991	P	159.66	A	77.6006	A	68.1377	A	50.7312	P	139.499	P	126.496	A	121.526	LOC_Os06g27970.1	FKBP12-interacting protein of 37 kDa, putative, expressed
Os000723_01	P	679.87	P	629.38	P	708.27	P	835.453	P	921.431	P	669.358	P	980.583	P	730.938	P	844.236	P	787.728	P	765.734	P	827.412	P	639.844	P	728.328	P	670.326	P	824.488	P	777.448	P	1051.93	LOC_Os05g49320.1	ribosomal protein L7/L12 C-terminal domain containing protein, expressed
Os000726_01	P	8736.25	P	7450.45	P	3684.75	P	1160.61	P	1117.48	P	971.975	P	2176.25	P	2955.15	P	2679.27	P	2459.95	P	2215.6	P	1991.1	P	1004.9	P	1017.69	P	1128.98	P	1889.84	P	1986.83	P	1630.21	LOC_Os12g41160.1	IQ calmodulin-binding motif family protein, putative, expressed
Os000729_01	A	97.9009	A	101.254	P	132.742	P	409.635	P	315.624	P	241.338	P	225.926	P	253.083	P	198.086	P	200.827	P	195.485	P	209.836	P	161.691	P	139.554	A	115.842	P	237.878	P	194.144	P	265.2	LOC_Os08g08440.1	hypothetical protein
Os000731_01	P	419.973	P	344.603	A	148.35	P	187.414	A	340.2	A	144.597	A	236.589	P	269.442	P	322.991	A	90.7453	A	83.9316	A	77.8136	A	11.7625	A	26.3104	A	26.4021	P	223.653	P	220.958	A	132.756	LOC_Os02g53830.1	MTD1, putative, expressed
Os000734_01	P	429.93	P	308.053	P	299.978	P	947.976	P	445.595	P	692.647	P	557.788	P	717.722	P	572.546	P	480.273	P	488.294	P	521.909	P	403.382	P	596.79	P	411.172	P	646.084	P	486.867	P	517.249	LOC_Os07g28400.1	CDGSH iron sulfur domain-containing protein 1, putative, expressed
Os000736_01	P	149.27	P	185.9	P	188.028	P	576.229	P	589.516	P	730.679	P	543.36	P	522.42	P	362.324	P	429.317	P	573.729	P	619.118	P	756.308	P	640.556	P	495.655	P	351.148	P	443.229	P	500.498	LOC_Os06g50970.1	hypothetical protein
Os000737_01	P	150.575	P	195.463	P	199.628	P	214.579	P	204.533	P	194.814	P	164.29	P	182.475	P	179.039	P	148.381	P	150.367	P	158.102	A	144.463	A	126.278	A	96.172	P	158.826	P	184.361	P	206.405	LOC_Os05g03174.2	glycosyltransferase family 43 protein, putative, expressed
Os000739_01	P	210.86	P	259.685	P	308.17	P	389.755	P	354.013	P	256.907	P	348.741	P	302.66	P	363.945	P	227.85	P	314.506	P	368.113	P	328.441	P	330.565	P	333.582	P	254.274	P	255.551	P	286.138	LOC_Os02g01200.1	glutaredoxin, putative, expressed
Os000741_01	P	222.577	P	179.424	A	120.994	P	300.281	P	314.841	P	230.704	P	278.529	P	302.035	P	272.082	P	150.803	P	192.378	P	206.475	P	178.138	P	242.444	P	217.121	P	194.104	P	184.298	P	219.63	LOC_Os08g25820.2	myb-like DNA-binding domain containing protein, expressed
Os000742_01	A	102.168	A	80.474	A	61.3543	P	170.945	P	186.73	A	155.734	P	204.526	P	170.715	A	124.006	A	93.102	A	100.44	A	96.2701	A	31.3492	A	30.1553	A	21.6996	A	134.257	P	161.655	A	162.838	LOC_Os08g07790.1	CRS2-associated factor 2, mitochondrial precursor, putative, expressed
Os000743_01	P	275.105	P	267.072	P	155.789	P	367.061	P	319.386	P	298.604	P	358.237	P	282.912	P	304.59	P	257.583	P	248.622	P	286.513	P	384.02	P	293.17	P	208.762	P	221.307	P	260.029	P	226.911	LOC_Os04g42580.1	carboxyvinyl-carboxyphosphonate phosphorylmutase, putative, expressed
Os000747_01	P	541.491	P	546.372	P	485.683	P	606.748	P	722.662	P	740.115	P	479.316	P	507.46	P	595.239	P	837.726	P	829.101	P	767.181	P	492.589	P	438.318	P	465.712	P	722.167	P	679.747	P	771.427	LOC_Os07g40040.1	expressed protein
Os000754_01	P	359.792	P	254.173	P	194.637	P	225.956	P	265.595	P	207.973	P	219.03	P	239.318	P	283.434	A	69.483	A	88.717	A	102.734	A	47.9187	A	63.5318	A	115.059	P	141.344	P	413.153	P	428.814	LOC_Os12g19304.2	Fe-S metabolism associated domain containing protein, expressed
Os000755_01	P	115.849	A	90.908	A	70.4368	P	208.956	P	261.336	P	124.553	A	105.335	P	144.996	P	191.5	A	53.9855	A	54.2848	A	51.4464	A	1.65543	A	22.6785	A	44.7998	A	90.1217	A	91.2799	A	80.0451	LOC_Os01g33080.1	fimbrin-like protein 2, putative, expressed
Os000757_01	P	384.107	P	243.704	P	211.389	P	415.328	P	351.421	P	497.645	P	368.483	P	480.969	P	378.96	P	151.83	P	179.331	P	228.288	P	127.916	P	137.106	P	166.056	P	246.679	P	244.014	P	201.948	LOC_Os03g03510.1	CAMK_KIN1/SNF1/Nim1_like.15 - CAMK includes calcium/calmodulin depedent protein kinases, expressed
Os000759_01	A	83.4894	A	63.5459	A	64.0754	P	205.616	P	232.697	P	220.903	A	123.452	P	144.525	P	157.538	A	68.3901	A	75.753	A	102.664	A	36.5446	A	45.0121	A	28.4475	A	98.902	P	157.943	A	179.065	LOC_Os06g48570.1	Ser/Thr protein phosphatase family protein, putative, expressed
Os000761_01	A	67.7116	A	59.4294	A	72.7625	P	223.332	P	239.251	P	216.272	P	207.429	P	215.915	P	169.501	A	62.7976	A	99.3681	A	93.529	A	30.9616	A	32.1584	A	34.5514	A	80.4109	A	97.2826	A	94.8295	LOC_Os02g11830.2	coatomer subunit beta, putative, expressed
Os000762_01	A	62.7736	A	54.158	A	67.4204	P	217.896	P	212.353	P	161.921	P	141.325	P	137.687	P	132.17	A	67.1511	A	72.1794	A	74.2342	A	35.759	A	39.4109	A	21.2544	P	152.755	P	144.381	A	93.3258	-	-
Os000767_01	P	406.608	P	453.235	P	491.914	P	537.124	P	488.428	P	436.925	P	382.042	P	368.22	P	382.487	P	701.112	P	788.058	P	814.327	P	702.978	P	659.234	P	648.305	P	740.111	P	777.506	P	760.34	LOC_Os04g47990.1	dof zinc finger domain containing protein, putative, expressed
Os000770_01	P	9428.88	P	9833.5	P	12196.1	P	9768.51	P	7388.33	P	5786.19	P	6798.87	P	6681.93	P	8434.05	P	8092.59	P	10878.4	P	13775.6	P	12350.6	P	12537	P	12668.6	P	11972.5	P	11954.5	P	10611.5	-	-
Os000773_01	P	966.341	P	616.527	P	371.884	P	595.695	P	707.23	P	449.625	P	405.873	P	549.392	P	505.677	P	259.537	P	232.86	P	195.822	P	293.33	P	334.62	A	241.683	P	228.267	P	223.522	P	295.252	LOC_Os03g03450.1	anthranilate phosphoribosyltransferase, chloroplast precursor, putative, expressed
Os000774_01	P	3781.01	P	4946.12	P	5826.69	P	2580.73	P	2518.95	P	2263.66	P	2045.29	P	2184.95	P	2374.16	P	882.71	P	899.203	P	829.194	P	4019.75	P	3647.49	P	3341.26	P	566.168	P	685.95	P	799.32	LOC_Os07g49210.1	helicase conserved C-terminal domain containing protein, expressed
Os000775_01	P	42706.2	P	43235.3	P	41900.8	P	46353.5	P	48544.3	P	56583.6	P	44888.8	P	43158.3	P	46351.7	P	29961.6	P	27516.9	P	27415.1	P	42088.2	P	43742.5	P	43830.2	P	16298.2	P	17838.7	P	21571.5	LOC_Os07g05720.1	TCP family transcription factor, putative, expressed
Os000779_01	A	69.645	A	72.3877	A	66.5683	P	267.498	P	346.531	P	160.246	P	125.557	P	202.597	P	161.243	A	65.7141	A	72.4997	A	65.9642	A	2.90494	A	23.4573	A	26.5138	P	227.092	P	135.628	P	171.362	LOC_Os04g46730.2	thioesterase family protein, putative, expressed
Os000781_01	A	79.0736	A	54.9667	A	67.9776	P	341.584	P	381.031	P	290.231	P	214.853	P	313.187	P	289.005	P	207.077	P	189.011	P	186.911	A	65.8838	A	62.2013	A	43.7787	P	248.465	P	187.886	P	200.242	LOC_Os01g16010.2	BCAS2 protein, putative, expressed
Os000784_01	P	126.276	A	106.943	A	86.868	P	281.674	P	307.953	P	307.436	P	276.729	P	236.463	P	265.141	P	158.528	P	187.797	P	224.606	A	50.812	A	73.8866	A	91.4456	P	253.923	P	236.845	A	169.524	LOC_Os07g01320.1	expressed protein
Os000786_02	A	133.419	A	103.84	A	89.5499	P	397.402	P	359.602	P	459.971	P	469.627	P	406.245	P	345.641	P	229.401	A	125.791	A	107.058	P	350.598	A	124.263	A	126.669	P	240.576	P	196.487	P	196.548	-	-
Os000787_01	P	1989.96	P	2794.3	P	4017.82	P	1304.21	P	1068.97	P	918.869	P	870.529	P	1137.83	P	1262.1	P	454.024	P	642.198	P	795.464	P	2072.49	P	2011.66	P	1969.99	P	405.249	P	628.173	P	656.744	LOC_Os07g18990.1	LTPL40 - Protease inhibitor/seed storage/LTP family protein precursor, expressed
Os000790_01	P	1067.14	P	1631.84	P	1420.71	P	2334.85	P	2922	P	2005.77	P	1235.26	P	1176.72	P	972.415	P	684.58	P	638.192	P	535.971	P	1393.8	P	1216.83	P	988.93	P	684.788	P	527.574	P	698.013	-	-
Os000798_01	A	112.189	A	83.1027	A	69.2345	P	308.777	P	205.308	P	182.791	P	151.352	P	300.748	P	303.742	P	187.202	P	176.158	P	207.006	A	121.406	A	109.501	A	149.516	P	207.968	P	244.037	P	205.383	LOC_Os07g01890.2	expressed protein
Os000799_01	A	43.6264	A	34.6619	A	34.8544	P	249.343	P	208.268	P	185.551	P	260.421	P	272.827	A	190.962	P	147.095	P	189.375	P	216.571	A	70.186	A	97.69	A	108.556	P	166.457	P	186.334	P	247.4	LOC_Os03g56000.1	PHLOEM 2-LIKE A10, putative, expressed
Os000802_01	A	103.449	A	72.7186	A	65.0285	P	203.125	A	126.668	A	125.096	A	121.008	P	141.174	P	158.758	A	47.7529	A	51.003	A	54.2589	A	14.9208	A	23.1272	A	24.5893	A	90.9835	A	89.5511	A	114.293	LOC_Os11g45295.1	retrotransposon protein, putative, unclassified
Os000803_01	P	408.834	P	351.848	P	139.852	P	329.362	P	346.55	P	441.976	P	258.466	P	289.569	P	203.108	P	172.072	P	245.213	P	301.222	P	137.289	A	124.281	A	148.438	P	208.885	P	209.489	P	219.67	-	-
Os000804_01	P	149.112	P	223.959	P	227.565	P	353.737	P	343.533	P	261.83	P	221.595	P	246.051	P	252.369	P	188.338	P	145.934	P	168.627	P	263.742	P	234.313	P	181.499	P	165.3	P	208.742	P	232.881	LOC_Os02g30420.1	expressed protein
Os000805_01	A	71.1339	A	83.133	A	71.9529	P	127.289	A	130.17	A	142.237	P	121.442	A	104.885	P	138.289	A	44.0123	A	56.5598	A	65.328	A	12.6371	A	17.7438	A	20.1228	A	73.9173	P	91.9951	A	104.822	LOC_Os09g20820.1	enolase, putative, expressed
Os000807_01	A	67.2039	A	59.3339	A	62.4639	P	173.98	P	178.58	P	167.1	P	203.209	P	222.678	P	122.121	A	119.586	A	108.444	P	135.965	A	27.7164	A	52.7697	A	45.4734	A	73.4237	P	93.7689	A	112.55	LOC_Os07g13280.1	RNA recognition motif containing protein, putative, expressed
Os000808_01	P	181.703	A	102.45	A	66.4692	P	263.616	P	244.056	P	150.053	P	182.124	P	182.832	P	166.922	A	71.878	A	79.0368	A	82.2945	A	35.6985	A	43.0793	A	35.0039	A	68.2096	A	90.2955	A	83.8735	LOC_Os05g01060.1	expressed protein
Os000812_01	P	2621.8	P	2848.83	P	1703.08	P	719.925	P	1086.25	P	1141.88	P	629.689	P	653.641	P	543.995	A	69.2054	A	79.7705	A	77.9289	A	123.931	A	99.0582	A	64.547	P	141.784	A	137.693	P	189.265	-	-
Os000817_02	P	6715.48	P	7457.53	P	9821.43	P	14329.3	P	11754.5	P	11392.3	P	15354.6	P	14041.9	P	10070	P	8957.99	P	8376.4	P	8556.41	P	11237	P	12654.3	P	13438.3	P	7309.19	P	7881.23	P	7306.1	-	-
Os000821_01	P	278.735	A	168.864	A	80.9492	P	228.035	P	238.086	A	2597.47	A	158.191	P	193.157	P	290.042	A	56.8573	A	71.0796	A	78.195	A	16.0451	A	28.2046	A	24.8089	A	112.749	A	96.0658	A	113.241	LOC_Os01g37600.1	agenet domain containing protein, expressed
Os000823_01	P	191.045	P	161.401	A	95.7532	P	309.274	P	256.673	P	182.512	P	757.911	P	592.44	P	280.285	P	158.897	A	129.058	A	112.379	A	41.0278	A	71.912	A	88.623	A	114.076	P	124.513	A	119.593	LOC_Os10g34030.1	zinc finger, C3HC4 type domain containing protein, expressed
Os000826_01	A	116.843	A	73.4095	A	78.4457	P	556.121	P	1017.55	P	772.331	P	1208.93	P	360.471	P	533.476	P	365.469	P	310.526	P	281.74	P	420.498	P	416.049	P	372.789	P	389.514	P	263.085	P	479.859	LOC_Os01g68830.1	expressed protein
Os000827_01	A	50.8588	A	105.153	A	63.9809	P	274.056	P	522.97	P	260.156	P	688.262	P	302.381	P	332.551	P	249.598	P	189.69	P	286.651	P	297.466	P	203.345	P	125.334	A	184.817	P	188.209	P	240.807	LOC_Os03g31730.1	expressed protein
Os000828_01	P	248.769	A	150.265	A	130.466	P	292.469	P	319.187	P	318.214	P	348.864	P	309.887	P	399.628	P	169.941	P	178.475	P	282.899	A	96.5268	P	146.263	A	90.3894	P	192.61	P	196.436	P	289.008	LOC_Os12g37960.2	diaminopimelate epimerase, chloroplast precursor, putative, expressed
Os000829_01	A	57.2714	A	65.2192	A	56.5628	P	235.308	P	210.582	P	186.093	P	208.264	P	222.278	P	220.478	A	68.7264	A	91.5452	A	103.43	A	24.9946	A	38.5918	A	36.3657	A	86.3351	P	101.979	A	114.751	LOC_Os04g57920.1	OsFBX154 - F-box domain containing protein, expressed
Os000831_01	A	127.517	A	113.729	A	76.5354	P	731.931	P	699.211	P	774.844	P	1012.1	P	1003.35	P	699.994	P	883.77	P	1072.95	P	1256.17	P	629.609	P	543.795	P	408.067	P	424.473	P	370.35	P	457.062	LOC_Os09g07660.2	ELMO/CED-12 family protein, putative, expressed
Os000832_01	P	6912.78	P	5447.97	P	2114.29	P	2121.1	P	4016.54	P	4366.71	P	3056.13	P	2583.46	P	1306.28	P	302.357	P	308.486	P	221.69	P	273.432	P	365.358	P	370.134	P	408.322	P	395.229	P	550.852	LOC_Os02g32280.1	expressed protein
Os000833_01	P	122.607	A	105.613	A	78.6581	P	283.673	P	230.44	P	159.017	P	188.588	P	226.51	P	271.242	P	126.697	A	121.542	P	175.571	P	183.147	P	145.373	P	118.153	P	186.02	P	189.17	P	231.897	LOC_Os03g10370.1	ADP-ribosylation factor, putative, expressed
Os000835_01	P	211.582	P	168.766	A	129.612	P	213.282	P	236.409	P	159.09	A	193.112	P	234.468	P	301.159	A	55.1309	A	75.3382	A	64.1633	A	11.2452	A	28.1652	A	22.5227	A	116.185	P	126.373	A	104.09	LOC_Os01g67160.1	cyclin-dependent kinase B1-1, putative, expressed
Os000836_01	P	116.453	A	102.626	A	79.3279	P	272.629	P	254.458	P	263.82	P	210.387	P	307.817	P	215.876	A	122.415	P	201.922	P	236.56	A	84.8171	A	120.043	A	177.459	P	113.611	P	175.994	P	162.481	LOC_Os02g12870.1	expressed protein
Os000837_02	P	4911.92	P	5589.75	P	6164.18	P	8072.52	P	7157.5	P	6365.88	P	10526.7	P	8898.2	P	8042.35	P	12807.7	P	12691.5	P	12861.2	P	8689.94	P	8846.38	P	8331.88	P	7001.24	P	8210.07	P	9835.8	LOC_Os08g34984.1	DUF581 domain containing protein, expressed
Os000838_01	A	47.3546	A	38.0719	A	52.1665	P	173.554	P	215.422	P	148.597	A	118.77	P	165.403	P	213.699	A	58.4443	A	65.7211	A	69.7642	A	30.5472	A	40.9223	A	43.6299	A	77.7462	A	97.2498	A	86.7848	LOC_Os05g22370.2	N-acetylglucosaminyl transferase component, putative, expressed
Os000842_01	P	1128.78	P	1822.73	P	2171.92	P	8493.74	P	11957.3	P	17312.4	P	8847.07	P	1491.59	P	5794.24	P	9707.77	P	11552.8	P	10756.5	P	9764.47	P	8663.24	P	12452.2	P	9046.29	P	7342.52	P	7465.18	LOC_Os12g33130.1	expressed protein
Os000843_01	P	840.869	P	611.26	P	257.99	P	305.702	P	292.034	P	210.628	P	569.691	P	646.548	P	756.542	P	154.455	P	254.487	P	229.528	P	151.93	A	116.944	P	254.68	P	233.33	P	321.946	P	299.842	LOC_Os11g05930.5	response regulator receiver domain containing protein, expressed
Os000844_01	P	3177.85	P	2055.62	P	1112.12	P	289.931	P	363.899	P	298.888	P	923.723	P	1019.11	P	1483.43	P	176.128	P	162.211	P	172.642	P	149.928	A	96.0784	A	90.2456	P	189.895	P	219.96	P	271.626	LOC_Os05g05220.1	glioma tumor suppressor candidate region gene 2 protein, putative, expressed
Os000846_01	P	100.89	A	86.2278	A	58.8176	P	215.516	P	245.53	A	110.194	P	131.069	P	203.221	P	243	A	43.996	A	46.5491	A	61.4604	A	50.6598	A	36.138	A	10.5129	A	86.4736	A	89.756	A	95.4239	LOC_Os01g36390.1	MCM4 - Putative minichromosome maintenance MCM complex subunit 4, expressed
Os000849_01	A	75.0306	A	92.9933	A	97.373	P	213.788	P	201.617	P	171.67	P	161.765	P	153.995	P	163.875	A	57.9941	A	59.0374	A	62.0485	A	55.8288	A	60.9319	A	60.9884	A	47.4425	A	95.6453	A	96.3573	LOC_Os09g34850.3	POLD4A - Putative DNA polymerase delta complex subunit, expressed
Os000851_01	A	49.9765	A	56.4458	A	58.7572	P	208.028	P	223.757	A	219.778	A	103.107	A	95.6061	P	172.675	A	42.5598	A	45.328	A	68.5241	A	-1.76843	A	14.7236	A	13.5526	A	262.89	A	140.691	A	63.6914	LOC_Os06g07330.1	OsWAK63 - OsWAK receptor-like protein kinase
Os000854_01	P	268.894	A	177.844	A	89.9422	P	289.597	P	247.746	P	224.215	P	247.745	P	290.397	P	239.744	A	91.5575	P	182.075	P	200.064	A	61.9221	A	153.813	P	377.896	P	184.04	P	191.041	P	180.235	LOC_Os02g32160.1	copine, putative, expressed
Os000860_01	A	79.9014	A	81.1765	A	54.2871	P	258.81	P	351.465	P	257.258	P	273.875	P	187.929	P	175.504	P	414.137	P	343.616	P	147.802	A	93.2681	P	147.077	A	85.2182	P	203.47	P	159.41	P	187.527	LOC_Os02g54360.1	enzyme of the cupin superfamily protein, putative, expressed
Os000862_01	A	57.8486	A	47.0915	A	50.8963	P	210.993	P	342.537	P	223.369	P	209.065	P	151.703	P	122.167	P	113.978	P	156.229	A	107.571	A	39.204	A	43.445	A	60.8304	P	623.162	P	300.086	A	146.16	LOC_Os07g25440.2	WD domain, G-beta repeat domain containing protein, expressed
Os000863_01	P	321.459	P	316.523	P	344.144	P	1018.85	P	850.489	P	864.253	P	513.646	P	668.492	P	640.626	P	837.287	P	786.975	P	566.9	P	634.765	P	880.747	P	935.532	P	417.026	P	529.814	P	557.566	LOC_Os11g02110.1	expressed protein
Os000867_01	A	141.921	P	148.716	A	151.87	P	247.526	P	288.121	P	217.479	P	212.892	P	235.83	P	282.268	P	155.443	P	131.391	P	146.884	P	181.871	A	135.878	A	118.322	A	148.788	P	151.815	P	203.331	-	-
Os000868_01	A	63.6483	A	52.6644	A	65.3763	P	238.167	P	185.755	P	237.596	P	203.88	P	199.681	A	142.7	P	148.601	P	191.658	P	163.515	A	33.0437	A	50.2656	A	87.7595	A	136.824	P	149.89	P	226.942	LOC_Os01g07490.1	RST1, putative, expressed
Os000870_01	P	131.167	A	107.464	A	69.3433	P	201.313	P	210.706	P	191.5	P	272.956	P	288.852	P	289.15	A	66.6851	A	79.2179	A	65.5256	A	38.8739	A	29.5238	A	20.3003	A	110.551	A	80.6064	A	104.332	LOC_Os02g03000.2	division protein, putative, expressed
Os000871_01	A	66.0255	A	55.9635	A	61.0583	P	145.654	P	182.173	P	228.778	A	182.358	P	177.53	A	105.655	A	75.0477	A	106.471	A	87.7941	A	22.9712	A	54.019	A	74.8925	A	106.435	A	89.8751	P	161.452	LOC_Os11g42160.1	F-box/LRR-repeat protein 3, putative, expressed
Os000873_01	A	59.1435	A	53.4347	A	66.5318	P	227.368	P	171.262	P	190.45	P	181.347	P	194.06	A	165.697	A	80.0861	A	90.707	A	111.283	A	12.4159	A	40.1034	A	64.5236	A	123.455	P	118.962	P	164.729	LOC_Os09g12790.1	potassium channel protein, putative, expressed
Os000874_01	A	59.8376	A	57.753	A	62.3594	P	218.467	P	227.418	A	193.828	P	142.714	P	153.154	P	186.125	A	64.4312	A	114.835	A	148.765	A	-4.81221	A	9.07727	A	2.28557	A	136.532	P	153.242	A	158.419	LOC_Os11g06740.1	syntaxin 6, putative, expressed
Os000875_01	P	186.289	P	165.929	A	93.713	P	386.873	P	266.939	P	266.965	P	482.313	P	454.488	P	444.335	P	206.441	P	191.99	P	219.233	A	91.3099	A	108.561	A	118.583	P	406.105	P	246.322	P	161.295	LOC_Os07g46180.1	PWWP domain containing protein, expressed
Os000881_01	A	67.1474	A	70.8883	A	64.0171	A	123.9	A	119.712	A	142.965	A	92.2741	P	145.597	P	114.981	A	36.6595	A	45.1251	A	62.267	A	13.9982	A	12.3699	A	11.6258	A	48.3953	A	76.5709	A	80.5515	LOC_Os08g34640.1	receptor-like protein kinase precursor, putative, expressed
Os000883_01	P	147.359	A	112.136	A	97.3039	P	238.584	P	227.785	P	168.756	P	160.374	P	180.6	A	144.902	A	42.964	A	54.7314	A	55.24	A	-24.1253	A	27.8672	A	28.8809	A	93.817	A	91.0806	A	96.5942	LOC_Os03g23030.1	aberrant pollen transmission 1, putative, expressed
Os000884_01	A	49.997	A	68.9791	A	62.8545	P	162.861	P	181.998	P	183.664	P	241.054	P	199.375	P	240.318	P	145.622	P	170.36	P	160.076	A	99.5106	A	95.9401	A	101.455	P	159.671	P	191.323	P	207.439	-	-
Os000887_01	P	626.862	P	475.168	P	410.437	P	328.905	P	282.398	P	219.648	P	557.635	P	415.365	P	381.829	P	162.146	P	137.589	P	142.389	P	274.441	P	265.758	A	244.091	P	161.262	P	141.783	P	232.67	LOC_Os03g13930.1	OsSub28 - Putative Subtilisin homologue, expressed
Os000890_01	A	65.729	A	50.274	A	60.8916	P	162.893	A	152.647	A	181.432	A	169.107	P	215.505	P	237.385	A	78.0094	A	87.3134	A	79.4336	A	22.5078	A	43.6186	A	59.344	A	116.087	P	144.453	A	124.125	LOC_Os05g31780.2	adaptor complexes medium subunit family domain containing protein, expressed
Os000891_01	P	2918.82	P	2971.75	P	1514.33	P	853.377	P	1339.33	P	1418.79	P	504.222	P	859.899	P	693.587	P	187.489	P	158.47	P	159.25	P	143.221	P	237.032	P	244.71	P	218.125	P	250.907	P	287.635	-	-
Os000892_01	P	229.866	A	111.34	A	63.0448	P	219.004	P	205.706	P	181.819	A	198.862	P	229.377	P	312.528	A	114.468	P	152.705	P	138.68	A	18.4961	A	49.3082	A	77.5553	A	108.128	A	98.5856	A	143.347	LOC_Os04g45190.1	MSP domain containing protein, expressed
Os000893_01	P	775.5	P	462.839	P	236.645	P	390.745	P	331.663	P	337.229	P	646.341	P	573.38	P	577.912	P	231.389	P	261.802	P	361.62	P	203.202	P	281.892	P	324.123	P	177.106	P	205.72	P	264.614	LOC_Os02g32610.3	protein kinase domain containing protein, expressed
Os000894_01	P	418.385	P	368.503	P	232.401	P	255.506	P	307.924	P	393.008	P	280.425	P	306.465	P	244.214	P	135.796	P	175.333	P	238.812	A	88.8981	A	113.757	A	133.558	P	165.325	P	140.968	P	206.361	LOC_Os02g08010.1	LTPL43 - Protease inhibitor/seed storage/LTP family protein precursor, putative, expressed
Os000896_01	A	103.685	A	99.9434	A	103.701	P	284.816	P	217.595	P	344.195	P	348.097	P	667.48	P	438.718	P	177.415	P	252.697	P	426.807	A	154.849	P	164.454	P	261.46	P	272.224	P	240.563	P	342.441	LOC_Os01g67220.2	Os1bglu4 - beta-glucosidase-like protein without signal sequence, expressed
Os000897_01	A	64.3386	A	52.6607	A	66.4688	P	161.154	P	190.113	P	273.595	P	243.225	P	177.875	A	209.18	A	107.801	A	101.183	A	128.765	A	44.2289	A	51.8627	A	60.25	A	106.592	P	114.716	A	116.549	LOC_Os03g55490.1	casein kinase II subunit alpha-2, putative, expressed
Os000898_01	A	73.7516	A	67.1265	A	86.8916	P	179.188	P	167.293	A	131.943	P	174.298	P	160.668	P	176.451	A	105.677	A	110.285	A	127.74	A	24.9195	A	20.287	A	42.6184	A	76.2702	A	90.5036	A	105.399	LOC_Os08g35220.1	cyclin-dependent kinase C-3, putative, expressed
Os000900_01	P	156.197	A	125.045	P	155.677	P	276.288	P	254.279	P	214.047	P	219.005	P	273.367	P	258.991	A	104.271	A	110.283	P	152.746	A	66.3846	A	103.903	A	126.443	P	182.663	P	169.96	P	181.082	LOC_Os01g42720.2	expressed protein
Os000901_01	A	65.8469	A	54.2078	A	64.8736	A	135.323	A	104.637	A	136.956	P	134.781	A	120.436	P	176.393	A	52.498	A	50.3909	A	75.0968	A	17.7361	A	22.3983	A	5.06072	A	78.9036	A	84.7991	A	120.015	LOC_Os02g45950.1	expressed protein
Os000902_01	A	60.1207	A	48.3844	A	51.473	P	142.735	A	122.043	A	103.42	A	95.2424	P	113.92	P	150.626	A	43.5956	A	42.623	A	56.3977	A	1.96261	A	35.6022	A	59.1864	A	79.0319	A	74.068	A	90.7606	LOC_Os03g53360.1	transferase family protein, putative, expressed
Os000904_01	P	468.852	P	381.29	A	104.891	P	215.708	P	191.504	P	237.561	P	356.171	P	343.93	P	304.246	P	172.13	P	174.534	P	209.67	A	62.6813	A	95.1352	A	104.17	A	131.482	P	160.927	P	216.563	LOC_Os06g48530.1	ZOS6-09 - C2H2 zinc finger protein, expressed
Os000907_01	A	40.2354	A	41.3476	A	42.8077	P	320.563	P	241.877	P	172.453	A	165.62	P	182.106	A	169.871	P	118.938	P	123.78	P	117.123	A	69.3244	A	103.871	A	125.151	A	111.201	P	129.648	A	118.21	LOC_Os08g21561.1	PPR repeat domain containing protein, putative
Os000911_01	P	229.518	P	213.423	P	208.274	P	318.088	P	321.374	P	354.611	P	271.646	P	257.978	P	212.351	P	217.438	P	172.507	P	270.256	P	245.848	P	218.828	P	218.297	P	186.53	P	174.046	P	235.761	LOC_Os01g48360.1	expressed protein
Os000915_01	A	44.7621	A	36.0386	A	49.0416	P	226.21	P	250.443	A	88.1019	A	76.6004	A	89.5505	A	91.0703	A	50.803	A	48.4126	A	46.103	A	-1.55253	A	28.1354	A	33.7257	A	92.0907	A	87.0957	A	93.5792	LOC_Os11g07060.5	receptor protein kinase CLAVATA1 precursor, putative, expressed
Os000917_01	A	61.1748	A	41.4335	A	55.2322	P	263.966	P	344.525	P	242.834	A	123.377	P	149.272	A	118.687	A	88.616	A	99.6485	A	107.782	A	34.3282	A	50.1574	A	91.1844	A	89.0508	A	88.6528	A	106.134	-	-
Os000918_01	A	100.879	A	101.08	A	89.925	P	386.064	P	1389.78	P	1713.11	P	1680.03	P	308.89	P	219.222	P	230.942	A	106.236	A	47.5846	P	170.737	P	279.811	P	247.216	P	439.79	P	226.494	P	383.363	LOC_Os11g44960.1	NBS-LRR disease resistance protein, putative, expressed
Os000919_01	A	104.34	A	105.854	A	78.7017	P	273.905	P	224.437	P	332.922	P	383.457	P	358.928	P	427.256	P	212.183	P	228.813	A	294.957	P	244.179	P	219.635	P	191.652	P	201.411	P	246.862	P	364.655	LOC_Os09g07294.1	purity of essence, putative, expressed
Os000924_01	A	59.4375	A	64.6561	A	57.4617	A	130.933	P	118.556	A	91.9616	A	114.497	A	120.63	A	104.438	A	67.9181	A	49.7789	A	64.866	A	-20.1571	A	31.5968	A	102.257	A	78.9708	P	88.9886	A	107.276	-	-
Os000928_01	A	48.392	A	53.5422	A	56.7148	P	257.375	P	247.684	P	290.841	P	311.233	P	351.668	P	225.675	P	197.091	P	264.409	P	312.238	A	90.6175	P	142.064	A	172.428	P	242.366	P	384.06	P	275.641	LOC_Os05g05800.1	OsFBL21 - F-box domain and LRR containing protein, expressed
Os000931_01	P	1222.46	P	1059.27	P	702.799	P	483.491	P	457.709	P	327.38	P	522.664	P	604.582	P	616.297	P	180.488	P	188.029	P	161.481	A	180.15	P	189.005	A	118.902	P	222.603	P	208.886	P	274.781	LOC_Os08g33740.1	CSLA11 - cellulose synthase-like family A, expressed
Os000934_01	A	125.312	A	107.131	P	134.128	P	444.834	P	299.498	P	266.754	P	160.731	P	258.757	P	266.016	A	127.684	P	152.855	P	177.058	P	173.867	P	158.305	P	186.501	P	193.972	P	186.352	P	218.291	LOC_Os01g56980.1	histidine acid phosphatase, putative, expressed
Os000935_01	P	620.169	P	476.732	P	407.473	P	799.061	P	586.788	P	431.72	P	1074.11	P	860.157	P	650.95	P	1441.25	P	1246.26	P	1007.54	P	804.311	P	854.964	P	1021.6	P	695.523	P	681.16	P	580.077	LOC_Os02g42560.1	expressed protein
Os000941_01	A	86.0659	A	98.0972	A	102.518	P	444.373	P	393.245	P	408.908	P	459.535	P	405.56	P	251.697	P	386.25	P	424.849	P	337.584	P	580.441	P	485.2	P	321.919	P	195.905	P	263.838	A	266.757	LOC_Os03g43390.2	F-box/LRR domain containing protein, putative, expressed
Os000942_01	A	68.7281	A	57.9653	A	83.5639	P	196.373	A	340.945	P	192.109	P	165.068	P	159.633	P	117.685	A	79.8498	A	80.4781	A	103.777	A	20.0378	A	30.4154	A	28.3235	A	119.136	P	146.357	A	115.532	LOC_Os08g31140.1	heavy metal-associated domain containing protein, expressed
Os000947_01	A	86.8945	A	70.2634	A	71.2822	P	224.848	P	196.829	A	236.261	P	267.629	P	193.921	P	159.459	P	293.723	P	295.128	P	187.445	A	140.124	P	191.592	A	98.1151	P	147.658	P	176.429	A	156.788	LOC_Os04g39629.1	RNA recognition motif containing protein, putative, expressed
Os000948_01	A	51.8418	A	50.4444	A	65.7747	P	156.996	A	218.526	A	152.497	A	147.17	P	140.686	P	171.048	A	42.555	A	37.4462	A	34.1033	A	8.2739	A	17.0571	A	22.4981	A	73.074	A	111.087	A	128.359	LOC_Os06g25294.1	60S ribosomal protein L18a-1, putative, expressed
Os000949_01	A	39.3958	A	43.8194	A	38.1197	P	173.484	P	264.111	A	195.34	P	176.812	P	130.821	P	145.922	A	61.4159	A	85.751	A	76.7822	A	39.9717	A	24.4715	A	3.66868	A	48.9773	A	81.7169	A	80.6861	LOC_Os07g37640.1	IKI3 family protein, expressed
Os000951_01	A	49.3662	A	45.9487	A	46.1475	P	203.23	P	335.636	P	128.257	P	204.26	A	221.781	A	88.7542	A	38.3963	A	52.9901	A	68.8676	A	7.14416	A	24.6111	A	28.738	A	83.1934	A	65.6643	A	67.0631	LOC_Os05g50200.2	expressed protein
Os000953_01	A	83.8732	A	68.1537	A	48.7778	P	177.667	P	162.606	A	132.779	A	141.259	A	134.073	P	199.873	A	87.5132	A	103.281	P	126.221	A	34.7922	A	43.8947	A	43.1457	A	76.5642	P	105.621	A	156.095	LOC_Os11g14430.1	APOBEC1 complementation factor, putative, expressed
Os000954_01	A	66.2942	A	59.1047	A	59.7376	P	202.125	P	193.979	P	212.195	P	208.683	P	190.142	P	189.008	P	133.686	P	143.614	A	122.799	A	36.4505	A	47.1439	A	31.6543	A	104.868	A	108.114	A	138.609	LOC_Os02g39350.1	eukaryotic translation initiation factor 2A, putative, expressed
Os000955_01	P	21639.8	P	24807.8	P	24845.9	P	18016.4	P	18502	P	11491.6	P	18882.2	P	14963.9	P	16520.3	P	15606.2	P	15429.3	P	16829.3	P	15602.5	P	15053.3	P	15306.3	P	11618.4	P	10356.9	P	13904.9	LOC_Os03g59480.1	expressed protein
Os000956_01	A	43.0384	A	25.2058	A	38.7167	P	187.863	P	231.854	A	108.937	A	635.897	P	878.748	P	554.294	A	44.7713	A	52.5485	A	54.7789	A	8.49568	A	470.132	A	582.442	P	198.22	P	188.397	A	203.371	LOC_Os09g32410.1	OsFBX333 - F-box domain containing protein, expressed
Os000957_01	P	285.934	P	376.904	P	382.262	P	421.92	P	500.085	P	439.864	P	541.598	P	334.008	P	460.335	P	279.454	P	290.371	P	235.803	P	435.01	P	319.293	P	231.16	P	258.628	P	267.331	P	280.257	LOC_Os04g54620.1	expressed protein
Os000959_01	A	46.404	A	37.2976	A	52.9289	P	167.698	A	130.578	A	126.825	A	117.785	A	120.94	A	142.082	A	76.2429	A	74.5323	A	74.7143	A	16.0758	A	25.2059	A	24.2759	P	172.118	P	151.058	A	130.98	LOC_Os06g29430.1	cytidine and deoxycytidylate deaminase zinc-binding region family protein, expressed
Os000963_01	A	69.5897	A	41.6636	A	64.0445	P	187.5	P	244.764	P	178.193	P	411.704	P	547.26	P	234.617	A	102.779	A	102.757	P	144.67	A	24.6046	A	36.9176	A	17.6818	P	158.41	P	105.742	A	122.552	LOC_Os03g17050.1	expressed protein
Os000964_01	P	172.167	A	124.742	A	93.2492	P	220.63	P	201.748	P	170.333	P	208.044	P	275.993	P	253.563	A	66.3406	A	82.7975	A	76.6445	A	26.3499	A	45.5025	A	-2.36114	P	193.046	P	157.592	A	183.247	LOC_Os03g20300.2	glucose-6-phosphate 1-dehydrogenase, chloroplast precursor, putative, expressed
Os000965_01	P	242.858	P	221.532	P	235.501	P	846.227	P	761.242	P	1009.21	P	813.327	P	960.201	P	809.541	P	470.336	P	531.394	P	695.294	P	917.549	P	853.808	P	745.835	P	456.791	P	856.516	P	986.3	LOC_Os01g73990.1	cytochrome b5-like Heme/Steroid binding domain containing protein, expressed
Os000968_01	A	98.4946	A	91.4195	A	73.8461	P	166.04	P	192.263	P	130.264	P	213.825	P	193.995	P	171.887	A	45.1553	A	65.6438	A	73.2332	A	137.658	A	90.1451	A	71.7869	A	162.023	A	122.737	A	101.259	LOC_Os03g01250.2	expressed protein
Os000969_01	P	427.907	P	287.815	P	195.358	P	203.996	P	257.171	P	199.798	P	389.703	P	333.376	P	360.622	A	52.4112	A	61.5303	A	73.1288	A	24.6137	A	28.9205	A	16.9573	A	76.0572	A	89.8365	A	99.1762	LOC_Os09g37650.2	flavin-containing monooxygenase family protein, putative, expressed
Os000971_01	P	140.409	P	163.61	P	199.682	P	196.606	P	188.739	P	170.747	P	194.989	P	183.673	P	217.418	A	70.6099	A	91.1862	A	118.548	A	85.8508	P	116.392	A	88.1657	A	97.3912	A	100.47	P	142.273	-	-
Os000973_01	P	564.98	P	486.407	P	295.98	P	248.943	P	285.718	P	309.183	P	322.441	P	349.759	P	383.218	A	57.9866	A	51.9905	A	58.5956	A	33.1919	A	49.5256	A	41.5553	A	99.2957	P	106.249	A	88.7828	LOC_Os01g08630.1	hypothetical protein
Os000979_01	P	302.87	P	250.511	A	135.458	P	214.51	P	196.54	P	158.772	P	181.266	P	238.142	P	321.613	A	59.3969	A	55.6646	A	67.0007	A	30.7534	A	39.9864	A	25.3094	A	79.0803	A	84.3374	A	91.6178	LOC_Os07g25050.1	thionin-like peptide, putative
Os000980_01	A	124.005	A	86.2389	A	89.1444	A	118.072	A	108.553	A	91.6564	P	199.448	P	224.306	P	225.221	A	21.8029	A	14.8241	A	4.54721	A	-3.82101	A	-3.92025	A	-5.7233	A	65.1669	A	67.5576	A	68.5373	LOC_Os02g09740.2	STRUBBELIG-RECEPTOR FAMILY 7 precursor, putative, expressed
Os000994_01	P	157.457	P	201.126	P	151.938	P	756.787	P	1089.27	P	1537.71	P	1294.36	P	770.121	P	642.192	P	481.981	P	275.782	P	763.369	P	395.838	P	462.356	P	439.362	P	1220.75	P	478.596	P	429.314	-	-
Os000995_01	P	385.354	P	379.311	A	135.84	P	145.843	P	172.045	P	151.235	P	250.28	P	213.093	P	230.63	A	58.4662	A	72.324	A	100.668	A	1.15314	A	16.8867	A	15.1529	A	81.5174	A	84.1551	A	133.216	LOC_Os02g51860.1	dehydration response related protein, putative, expressed
Os000997_01	P	163.964	P	192.355	P	173.251	P	183.885	P	169.781	P	259.513	P	279.75	P	291.786	P	239.208	A	67.3154	A	97.1045	A	111.072	A	80.406	P	120.876	P	156.721	A	120.3	P	121.766	A	116.551	-	-
Os000999_01	P	654.646	P	850.564	P	835.007	P	947.85	P	1268.02	P	1293.09	P	861.996	P	777.737	P	460.575	P	277.043	P	248.839	P	211.034	P	717.935	P	844.621	P	931.714	P	319.077	P	310.813	P	274.917	LOC_Os01g61590.1	CAMK_CAMK_like.1 - CAMK includes calcium/calmodulin depedent protein kinases, expressed
Os001002_01	A	57.8115	A	36.4602	A	33.5526	P	171.11	P	176.728	P	177.432	P	174.015	P	205.855	P	186.955	A	94.4027	A	90.4885	A	93.5534	A	14.2207	A	28.2872	A	16.1366	A	106.924	P	145.131	A	132.305	LOC_Os01g68120.1	DCL3, putative, expressed
Os001004_01	P	405.745	P	456.926	P	553.756	P	1002.73	P	703.098	P	422.4	P	445.009	P	523.586	P	517.634	P	275.974	P	239.717	P	274.721	P	911.125	P	704.146	P	562.355	P	202.287	P	247.58	P	289.594	LOC_Os01g58310.1	hypothetical protein
Os001005_01	P	628.377	P	727.861	P	881.02	P	544.527	P	483.212	P	442.488	P	388.284	P	607.122	P	605.983	P	282.083	P	307.886	P	275.283	P	388.407	P	353.776	P	273.302	P	278.632	P	266.75	P	293.757	LOC_Os04g38330.1	radical SAM enzyme, putative, expressed
Os001007_01	P	540.757	P	374.963	P	184.095	P	229.008	P	248.829	P	176.663	A	491.557	P	604.152	P	545.738	A	78.5475	A	114.37	P	131.17	A	26.4687	A	35.5482	A	37.4314	A	134.758	P	130.175	P	181.974	LOC_Os10g11060.1	ACI13, putative, expressed
Os001008_01	A	60.6261	A	65.463	A	61.7421	P	397.815	P	535.016	P	481.95	P	719.595	P	488.312	P	587.226	P	221.348	P	270.132	P	362.039	P	209.439	P	198.786	P	221.256	P	222.068	P	255.803	P	254.571	LOC_Os01g03820.1	C2 domain containing protein, putative, expressed
Os001011_01	P	278.773	P	496.759	P	467.458	P	636.738	P	667.798	P	360.537	P	442.314	P	377.771	P	480.881	P	1097.4	P	972.062	P	998.003	P	921.49	P	587.1	P	417.495	P	507.951	P	345.239	P	795.638	LOC_Os02g43670.1	transferase family protein, putative, expressed
Os001012_01	P	658.16	P	616.186	P	371.302	P	367.243	P	310.208	P	235.421	P	274.014	P	278.457	P	217.646	A	43.3376	A	31.1744	A	32.1232	A	20.9709	A	61.9746	A	65.8983	A	109.409	A	74.8348	A	90.9048	LOC_Os10g41220.1	protein kinase family protein, putative, expressed
Os001013_01	P	122.311	A	89.0971	A	76.8045	P	138.621	A	132.409	P	164.034	P	187.653	P	193.895	P	155.927	A	44.877	A	48.2723	A	54.1211	A	-0.956169	A	12.9757	A	7.24612	A	62.3055	A	70.6993	A	84.3457	LOC_Os05g06900.1	hypothetical protein
Os001014_01	P	382.63	P	317.134	P	136.665	P	184.626	P	216.967	P	245.307	P	349.279	P	299.345	P	325.201	P	174.317	P	210.546	P	155.673	A	89.0004	A	77.0191	A	75.2654	A	95.6919	P	114.196	A	143.639	LOC_Os01g43380.1	glycosyltransferase family protein 1, putative, expressed
Os001015_01	P	133.576	A	106.19	A	65.7997	P	176.288	P	173.102	P	198.445	P	273.886	P	231.831	P	212.885	P	155.219	P	203.328	P	272.947	A	87.4474	A	84.9344	A	54.8482	A	124.692	P	128.28	A	131.761	LOC_Os11g41140.1	zinc finger, C3HC4 type domain containing protein, expressed
Os001016_01	A	115.746	A	113.009	A	102.298	P	203.787	P	193.796	P	218.034	P	145.131	P	143.915	P	176.03	A	73.3111	A	88.4486	A	93.0641	A	66.9177	A	108.982	A	150.986	A	97.85	A	103.851	P	149.05	LOC_Os01g55510.1	dynein light chain type 1 domain containing protein, expressed
Os001017_01	A	100.05	A	105.943	A	104.667	P	254.279	P	225.871	P	183.137	P	138.096	P	255.33	P	199.871	A	125.775	P	113.369	P	159.983	P	153.155	P	166.876	A	111.969	A	128.806	P	155.064	P	172.614	LOC_Os01g59750.1	histidine triad family protein, putative, expressed
Os001020_01	A	90.0566	A	73.8961	A	62.4062	P	262.648	P	300.527	P	296.001	P	292.381	P	224.942	P	198.888	P	200.433	P	213.223	P	183.923	P	250.77	A	107.749	A	89.3983	A	140.927	P	164.935	A	139.301	LOC_Os08g44170.1	transposon protein, putative, unclassified
Os001021_01	P	3166.88	P	3584.06	P	4055.67	P	2426.66	P	2080.06	P	1471.5	P	1827.95	P	1701.3	P	1537.5	P	2830.73	P	3567	P	3746.83	P	3206.42	P	2789.13	P	2395.03	P	1477.23	P	1869.31	P	2781.57	LOC_Os03g59670.1	basic helix-loop-helix, putative, expressed
Os001026_01	A	104.593	A	92.8845	A	127.068	P	291.539	P	334.901	P	238.852	P	198.218	P	195.964	P	210.059	A	108.178	A	88.4207	A	71.1904	P	128.975	A	92.4159	A	48.646	A	123.819	P	168.892	P	131.539	LOC_Os08g21590.2	phosphatidylinositol 3-kinase, root isoform, putative, expressed
Os001035_01	P	1312.49	P	896.314	P	308.782	P	398.058	P	451.08	P	793.603	P	999.894	P	765.519	P	628.117	P	273.056	P	501.596	P	458.925	P	584.255	P	554.873	P	659.244	P	271.688	P	297.173	P	314.941	LOC_Os01g61070.1	heavy metal-associated domain containing protein, expressed
Os001037_01	A	122.115	A	113.109	A	122.567	P	152.272	P	218.444	P	173.632	P	190.749	P	190.77	P	264.868	A	63.3403	P	151.027	A	110.232	A	54.623	A	53.4952	A	44.1149	A	81.7898	A	109.72	A	76.4115	LOC_Os01g42080.1	zinc ion binding protein, putative, expressed
Os001041_01	A	94.0945	P	151.609	P	158.497	P	178.307	P	247.184	P	174.738	P	248.375	P	202.267	P	302.208	A	73.7206	A	76.1862	A	71.1042	A	76.0262	A	68.1044	A	53.1162	A	117.773	P	143.366	A	126.561	LOC_Os07g37810.2	STRUBBELIG-RECEPTOR FAMILY 1 precursor, putative, expressed
Os001045_01	P	460.958	P	571.219	P	717.983	P	982.741	P	743.919	P	537.656	P	564.701	P	613.627	P	641.077	P	460.141	P	489.088	P	455.702	P	876.828	P	659.533	P	526.959	P	514.076	P	428.085	P	368.329	-	-
Os001046_01	A	72.6145	A	86.0872	A	73.0121	P	238.849	P	244.732	P	245.434	P	266.205	P	340.698	P	337.937	P	187.907	P	184.409	P	224.46	A	101.129	A	80.0679	A	93.7003	A	146.764	P	200.027	P	241.773	LOC_Os03g02514.1	hydrolase, alpha/beta fold family protein, putative, expressed
Os001054_01	A	47.0073	A	39.1149	A	56.2187	P	155.632	A	129.87	A	107.99	A	120.069	P	169.444	A	131.331	A	39.7224	A	56.3285	A	71.9818	A	-1.19375	A	12.2238	A	5.19984	A	62.7443	A	81.6806	A	104.782	LOC_Os01g61200.1	GDSL-like lipase/acylhydrolase, putative, expressed
Os001057_01	A	66.9135	A	69.9428	A	72.4529	P	245.096	P	295.444	P	246.251	P	260.213	P	237.719	P	184.842	A	128.319	P	341.75	A	439.502	P	215.823	A	114.11	A	55.5328	A	96.7911	P	132.183	P	219.899	LOC_Os09g26190.1	CBS domain containing protein, expressed
Os001058_01	P	284.494	P	263.086	A	120.18	P	327.183	P	289.741	P	370.909	P	473.239	P	427.454	P	400.196	P	189.596	P	242.648	P	316.15	P	159.698	A	120.953	A	99.9787	P	180.955	P	180.207	A	202.36	LOC_Os07g10540.2	peptidase, M24 family protein, putative, expressed
Os001064_01	A	115.164	A	114.768	A	75.6125	P	199.674	P	211.287	P	193.292	P	166.087	P	163.578	P	191.057	A	66.7744	A	80.5829	A	104.093	A	11.5034	A	30.8437	A	27.5601	A	102.325	A	96.8803	A	107.981	-	-
Os001065_01	P	171.129	P	181.844	P	163.827	P	249.172	P	267.934	P	222.28	P	205.136	P	201.919	P	241.868	A	130.627	P	157.513	P	263.312	A	93.6104	P	156.795	A	151.895	P	141.11	A	108.403	P	148.074	LOC_Os07g46240.1	choline transporter-related, putative, expressed
Os001066_01	A	57.699	A	71.6656	A	64.4317	P	211.786	P	216.731	P	176.301	A	109.499	P	162.048	P	151.59	A	71.9164	A	95.3258	P	136.218	A	61.4638	A	66.8656	A	43.8304	P	137.578	P	103.904	A	98.0181	LOC_Os02g54500.1	WD40-like, putative, expressed
Os001071_01	P	424.723	P	331.59	P	307.086	P	324.77	P	289.371	P	261.44	P	335.363	P	340.04	P	354.979	A	103.875	A	96.5703	A	101.978	P	169.159	P	174.435	A	133.617	A	93.5141	P	130.811	P	129.767	LOC_Os03g01590.2	PAIR1, putative, expressed
Os001072_01	A	84.928	A	71.4492	A	69.0732	P	160.189	P	151.98	P	180.341	A	91.5293	A	101.195	P	137.998	A	39.103	A	40.7967	A	48.809	A	23.8385	A	18.3825	A	3.36193	A	89.6108	A	88.6938	A	85.6462	LOC_Os07g06970.1	HEN1, putative, expressed
Os001073_01	A	120.196	A	78.7484	A	80.4353	P	193.386	P	180.16	P	157.752	P	166.83	P	241.724	A	166.826	A	60.4315	A	82.2764	A	86.7655	A	15.3515	A	32.3834	A	46.2183	A	126.93	A	100.693	A	110.242	LOC_Os02g28040.1	lipase, putative, expressed
Os001077_01	P	269.293	P	242.255	P	231.749	P	287.551	P	235.276	P	213.797	P	205.988	P	232.084	P	238.805	A	118.686	A	110.691	P	124.295	P	216.407	P	191.378	P	210.686	A	109.186	P	151.282	P	172.624	-	-
Os001079_01	P	635.225	P	557.339	P	702.955	P	1009.13	P	703.432	P	578.597	P	577.09	P	839.481	P	869.358	P	398.972	P	330.214	P	379.775	P	1408.06	P	1186.88	P	698.875	P	322.998	P	284.36	P	518.219	LOC_Os01g63260.1	3-oxo-5-alpha-steroid 4-dehydrogenase, putative, expressed
Os001081_01	A	69.8621	A	95.6636	A	85.5219	P	153.128	P	168.247	P	170.914	A	135.785	P	140.533	P	146.384	A	48.3036	A	51.8144	A	65.1639	A	-0.708568	A	8.22522	A	11.7766	A	65.8904	A	76.1268	A	79.3854	LOC_Os11g10180.1	OsFBX412 - F-box domain containing protein, expressed
Os001084_01	P	320.439	P	249.245	P	145.653	P	166.505	P	222.167	P	224.771	P	286.904	P	283.077	P	249.846	A	60.9025	A	67.0984	A	84.3746	A	38.3699	A	30.283	A	11.833	A	108.513	A	87.005	A	92.0319	LOC_Os10g35290.1	DNA-directed RNA polymerase I subunit RPA2, putative, expressed
Os001086_01	A	49.8239	A	53.5042	A	62.1883	P	150.329	P	130.611	A	179.156	P	123.22	P	178.805	P	159.65	A	51.9004	A	66.0732	A	84.9154	A	14.9945	A	10.9642	A	-2.17866	A	73.867	A	85.4473	A	115.793	LOC_Os01g70250.1	heat shock protein DnaJ, putative, expressed
Os001087_01	A	48.4315	A	59.5165	A	55.8812	P	148.334	A	191.501	A	184.246	A	80.1042	P	132.964	P	158.584	A	70.3205	A	114.662	A	106.564	A	5.82593	A	33.7028	A	85.6459	A	85.4835	P	108.419	A	104.315	LOC_Os10g41550.1	beta-amylase, putative, expressed
Os001090_01	A	62.853	A	59.0028	A	65.6827	P	147.375	P	180.964	P	179.843	A	104.052	A	118.11	A	155.674	A	67.559	A	91.1478	A	89.7073	A	33.626	A	36.0814	A	9.51276	A	97.7522	A	94.5865	A	84.7243	LOC_Os02g50370.1	helicase domain-containing protein, putative, expressed
Os001094_01	A	105.408	A	76.3463	A	57.5354	P	231.739	P	198.452	A	95.1146	A	140.106	P	170.146	P	173.315	A	60.8842	A	38.9649	A	49.6871	A	3.67066	A	109.102	A	121.049	A	61.1641	A	81.0493	A	98.2689	-	-
Os001096_01	A	94.8556	A	80.8109	A	69.3469	P	405.121	P	387.699	P	378.697	P	230.113	P	354.752	P	301.719	P	185.992	P	203.025	P	262.58	A	89.0739	A	87.243	A	76.4648	P	284.404	P	160.145	P	191.799	LOC_Os12g06670.1	protein kinase family protein, putative, expressed
Os001103_01	P	188.702	P	201.806	A	201.356	P	902.311	P	937.152	P	878.133	P	723.357	P	853.94	P	503.567	P	559.988	P	652.442	P	796.646	P	1378.29	P	1013.28	P	505.741	P	472.262	P	622.494	P	643.987	LOC_Os02g05700.2	OsFBO8 - F-box and other domain containing protein, expressed
Os001104_01	A	44.177	A	49.5578	A	45.3681	P	195.648	P	200.617	P	246.534	P	212.32	P	230.638	P	188.599	A	133.534	P	130.825	P	158.584	A	82.2615	A	72.8508	A	38.5708	A	124.667	P	151.594	P	251.354	LOC_Os01g46700.1	SET domain containing protein, expressed
Os001105_01	P	1231.08	P	1206.9	P	1375.23	P	488.606	P	572.695	P	794.472	P	598.119	P	680.471	P	536.068	P	222.223	P	182.354	P	215.291	P	397.058	P	308.987	P	308.204	P	327.895	P	336.063	P	374.61	LOC_Os03g53580.1	expressed protein
Os001107_01	A	61.5918	A	53.3986	A	56.657	P	155.816	A	146.723	A	115.536	A	115.433	P	169.374	P	145.755	A	39.6226	A	62.5184	A	71.8548	A	9.24219	A	26.3617	A	22.0014	A	77.5929	A	79.5869	A	86.9493	LOC_Os07g06610.1	ubiquitin carboxyl-terminal hydrolase domain containing protein, expressed
Os001108_01	P	846.639	P	591.627	P	235.313	P	207.412	P	280.003	P	206.86	P	318.717	P	314.352	P	339.959	A	52.5074	A	54.9615	A	62.3291	A	61.7611	A	57.0349	A	11.3563	A	60.505	A	89.6132	A	103.938	LOC_Os08g38080.1	helix-loop-helix DNA-binding domain containing protein, expressed
Os001109_01	A	53.8667	A	81.3675	A	208.408	P	275.652	P	212.362	P	225.3	P	319.845	P	286.586	P	176.13	P	158.5	P	200.044	P	234.42	P	202.803	P	198.083	A	91.3585	P	213.586	P	208.576	P	257.584	LOC_Os02g34500.1	expressed protein
Os001111_01	A	107.705	A	98.0264	A	79.5074	P	182.933	P	257.048	P	211.632	A	99.9555	A	110.225	P	150.234	A	47.1597	A	64.073	A	69.6834	A	14.5011	A	12.1846	A	19.4869	A	95.4024	A	88.2064	A	78.4355	-	-
Os001124_01	P	211.168	P	184.217	P	167.694	P	284.69	P	403.056	P	408.956	P	345.055	P	249.902	P	260.95	P	260.134	P	276.775	P	322.683	P	197.09	P	218.876	P	224.267	P	205.643	P	202.296	P	230.423	LOC_Os12g38310.1	mitochondrial import inner membrane translocase subunit Tim, putative, expressed
Os001125_01	A	58.1474	A	41.7826	A	53.654	P	237.304	P	212.127	P	187.664	A	143.727	P	169.579	A	122.924	A	73.11	A	81.215	A	67.7409	A	-2.84004	A	15.251	A	-1.15739	A	95.8407	A	95.1077	A	97.7013	LOC_Os06g44060.2	phospholipase D. Active site motif family protein, expressed
Os001127_01	A	74.076	A	81.1245	A	69.5881	P	251.836	A	202.134	A	131.15	A	65.7689	A	156.792	A	262.98	A	43.5885	A	47.1743	A	45.7944	A	5.34621	A	15.5785	A	14.8114	A	75.3029	A	89.6689	A	91.7372	-	-
Os001128_01	P	162.347	A	139.869	P	149.664	P	232.753	P	247.629	P	182.279	P	374.064	P	238.427	P	266.254	A	57.4036	A	49.4968	A	62.5608	A	29.702	A	15.4165	A	17.1036	A	69.5755	A	100.721	A	80.6022	LOC_Os07g33580.1	cytochrome P450, putative, expressed
Os001131_01	P	125.819	A	91.8604	A	80.3991	P	323.038	P	275.251	P	261.327	P	147.794	P	272.168	P	314.995	A	89.3759	A	136.28	P	189.752	A	102.724	A	79.5458	A	71.6642	P	178.639	A	138.322	P	114.391	LOC_Os07g43900.1	protein kinase domain containing protein, expressed
Os001136_01	P	285.058	P	224.002	P	204.965	P	211.426	P	185.238	P	156.854	P	270.122	P	238.067	P	258.719	A	56.6975	A	58.1129	A	48.4839	A	20.1438	A	30.5742	A	10.2652	A	72.5977	A	188.84	P	373.773	LOC_Os06g12870.1	leaf senescence related protein, putative, expressed
Os001141_01	A	66.137	A	58.6234	A	47.0288	P	167.968	P	193.404	P	127.434	P	148.926	P	174.018	P	177.118	A	47.2364	A	44.4493	A	46.9224	A	10.3637	A	24.1898	A	17.5645	A	76.434	A	95.0256	A	75.6707	LOC_Os09g38440.1	ATXR, putative, expressed
Os001143_01	A	64.7599	A	49.3432	A	52.1963	A	224.054	A	162.096	A	58.576	A	101.653	A	78.3011	P	108.198	A	49.4753	A	66.3621	A	71.628	A	10.4915	A	24.3574	A	15.4374	A	74.9238	A	90.0319	A	95.5043	LOC_Os02g56820.1	OsFBX69 - F-box domain containing protein, expressed
Os001145_01	A	59.4377	A	42.3047	A	53.3727	P	242.184	P	239.502	A	90.3802	A	70.4523	A	90.6729	A	112.264	A	48.2066	A	55.7503	A	61.6267	A	8.12138	A	28.7522	A	19.2094	A	57.425	A	73.0703	A	86.3933	LOC_Os03g56590.1	expressed protein
Os001147_01	A	76.4165	A	55.9175	A	57.7948	P	241.517	P	260.262	P	241.924	P	190.967	P	181.881	P	165.584	A	93.7159	A	122.652	P	170.39	A	54.6128	A	72.5098	A	112.427	P	133.073	A	116.306	A	127.629	LOC_Os02g17910.1	CK1_CaseinKinase_1.4 - CK1 includes the casein kinase 1 kinases, expressed
Os001150_01	P	244.976	P	207.36	P	170.098	P	249.478	P	241.265	P	195.216	A	167.952	P	212.914	P	228.736	A	85.9682	A	104.999	A	100.466	A	90.8704	A	77.7137	A	56.5393	A	82.0785	A	111.773	A	117.078	LOC_Os02g21490.1	WD domain, G-beta repeat domain containing protein, expressed
Os001161_01	P	488.938	P	598.202	P	670.751	P	449.819	P	395.239	P	278.12	P	345.772	P	398.726	P	463.747	P	432.412	P	411.213	P	497.2	P	500.423	P	411.56	P	377.021	P	441.877	P	722.264	P	581.601	LOC_Os03g08150.1	Cupin domain containing protein, expressed
Os001163_01	A	116.809	A	85.485	A	87.1198	P	308.867	P	272.396	P	222.434	P	269.348	P	238.524	P	254.756	P	143.217	P	141.424	A	118.67	A	76.8108	A	78.7998	A	101.005	A	64.6902	A	96.0018	A	105.834	LOC_Os05g43480.1	ubiquitin carboxyl-terminal hydrolase domain containing protein, expressed
Os001164_01	P	261.682	P	198.354	A	139.052	P	236.964	P	202.623	A	105.602	A	135.647	P	217.508	P	258.108	A	26.9293	A	24.993	A	38.1019	A	25.4972	A	18.2637	A	21.1553	A	64.2961	A	61.9513	A	41.1586	LOC_Os12g03410.1	expressed protein
Os001170_01	A	84.042	A	67.8783	A	65.2015	P	220.509	P	189.614	A	89.8649	A	53.5611	A	93.2166	A	113.55	A	73.0556	A	80.2252	A	72.9348	A	12.7701	A	68.0168	A	91.0408	A	75.7966	A	94.6252	P	103.405	LOC_Os09g27590.1	expressed protein
Os001175_01	P	127.683	A	107.14	A	80.3722	P	174.591	P	158.25	A	129.926	A	146.424	P	183.171	P	201.765	A	46.7362	A	50.577	A	52.1755	A	12.5819	A	14.0814	A	11.7477	A	55.9511	A	69.9445	A	55.3015	LOC_Os09g38720.1	mTERF domain containing protein, expressed
Os001179_01	A	55.2097	A	61.6385	A	59.8761	P	273.194	P	200.313	A	169.238	A	141.135	P	202.951	P	203.954	A	90.1435	A	127.75	P	191.67	P	212.715	A	122.145	A	121.436	A	102.511	P	175.214	P	191.308	LOC_Os01g09200.1	AGC_AGC_other_NDRh_TRCd.1 - ACG kinases include homologs to PKA, PKG and PKC, expressed
Os001182_01	A	105.81	A	103.076	A	130.495	P	157.15	A	220.904	A	278.564	P	163.259	P	124.074	A	126.175	A	70.53	A	69.4554	A	84.711	A	17.3488	A	33.0761	A	27.9664	P	120.156	A	97.3211	A	105.08	LOC_Os02g27810.1	MazG nucleotide pyrophosphohydrolase domain containing protein, expressed
Os001183_01	P	3688.76	P	2056.6	P	829.846	P	580.637	P	678.483	P	677.859	P	2020.01	P	1616.67	P	1753.7	P	566.056	P	548.144	P	464.869	P	229.002	P	229.917	P	190.414	P	500.337	P	592.118	P	687.128	LOC_Os11g13930.1	ZF-HD protein dimerisation region containing protein, expressed
Os001188_01	A	82.0015	A	73.6789	A	56.5215	P	222.902	P	195.954	P	149.525	P	141.095	P	142.053	A	162.651	A	65.2478	A	76.3185	A	88.2351	A	21.1214	A	56.7387	A	65.0194	A	71.2028	A	75.2758	A	61.5382	LOC_Os04g22360.1	DUF647 domain containing protein, putative, expressed
Os001194_01	P	151.361	A	105.492	A	70.8015	P	289.273	P	262.113	P	221.857	P	294.092	P	235.399	P	283.098	P	154.252	P	187.535	P	212.079	A	47.543	A	88.6158	P	155.942	P	235.648	P	227.289	P	211.32	LOC_Os03g03460.1	erythronate-4-phosphate dehydrogenase, putative, expressed
Os001197_01	A	104.39	A	82.9207	A	79.0983	P	256.688	P	188.144	A	161.818	P	177.927	P	226.475	P	211.248	P	111.689	P	181.109	A	161.727	P	162.36	A	130.069	P	171.823	A	92.1344	A	130.08	P	162.041	LOC_Os05g48380.1	ubiquitin-conjugating enzyme domain containing protein, expressed
Os001204_01	P	135.354	A	399.357	A	565.449	P	222.498	P	216.878	P	168.412	P	192.532	P	167.176	P	219.588	P	105.064	A	86.2235	A	91.6247	A	80.1769	A	63.6141	A	59.0922	A	57.3486	A	99.1202	A	95.4416	LOC_Os06g24594.5	exonuclease, putative, expressed
Os001207_01	P	3996.99	P	2517.62	P	826.162	P	386.825	P	453.528	P	418.153	P	1020.4	P	977.963	P	1143.45	P	318.707	P	343.272	P	354.226	P	201.976	P	215.793	P	211.709	P	441.58	P	440.712	P	465.379	-	-
Os001211_01	P	723.95	P	470.765	P	292.615	P	479.138	P	431.278	P	276.722	P	520.849	P	493.827	P	491.048	P	450.47	P	345.597	P	316.871	P	384.259	P	429.249	P	496.615	P	379.307	P	362.119	P	464.095	LOC_Os06g44050.1	methyladenine glycosylase, putative, expressed
Os001213_01	P	319.352	P	274.881	P	214.969	P	672.031	P	567.487	P	685.65	P	417.256	P	415.02	P	345.412	P	382.771	P	418.14	P	559.61	P	333.235	P	352.688	P	384.247	P	358.3	P	410.555	P	403.057	LOC_Os05g14860.1	seven in absentia protein family domain containing protein, expressed
Os001215_01	P	292.951	P	323.356	P	202.973	P	446.116	P	549.272	P	885.831	P	522.136	P	448.784	P	273.839	P	334.142	P	382.626	P	200.43	P	383.552	P	857.864	P	931.361	P	236.106	P	217.986	P	267.06	LOC_Os03g55450.2	expressed protein
Os001217_01	A	51.3589	A	41.3229	A	43.6318	P	143.478	A	129.889	A	72.0194	P	218.517	P	335.848	A	310.658	A	72.2575	A	113.626	A	147.329	A	-11.0921	A	13.8207	A	33.3862	A	94.5557	A	83.8719	A	90.0881	-	-
Os001218_01	P	120.45	A	86.8767	A	73.0574	P	243.34	P	201.997	P	167.1	P	166.362	P	186.842	P	138.05	P	142.445	P	146.177	P	159.225	A	111.872	P	155.752	A	130.319	P	164.377	P	152.722	P	196.028	LOC_Os09g37330.1	OsSAUR39 - Auxin-responsive SAUR gene family member, expressed
Os001219_01	A	48.1169	A	67.7671	A	96.5649	P	234.692	P	243.759	P	302.26	P	168.534	P	218.024	A	115.156	P	192.24	P	219.436	A	145.285	A	42.0604	A	55.0095	A	62.3453	A	198.883	P	311.115	P	393.227	-	-
Os001220_01	P	185.429	P	213.984	P	228.007	P	293.611	P	413.954	P	477.582	P	711.413	P	742.516	P	719.015	P	252.715	P	240.969	P	284.454	P	429.378	P	320.241	P	396.298	P	229.753	P	445.988	P	450.28	LOC_Os06g21110.1	expressed protein
Os001223_01	A	78.5192	A	88.3603	A	104.993	P	393.066	P	476.75	P	487.558	P	676.971	P	437.384	P	344.92	P	210.113	P	276.997	P	392.078	P	162.707	P	207.395	A	142.193	P	230.428	P	248.315	P	225.089	LOC_Os11g08940.1	RNA polymerases N 8 kDa subunit, putative
Os001224_01	A	87.5067	A	71.2857	A	76.208	P	249.453	P	215.268	P	190.576	P	138.453	P	191.741	P	185.938	A	58.7894	A	86.8786	A	107.319	A	37.9681	A	59.7975	A	74.4193	A	99.4624	A	98.9367	A	111.876	LOC_Os11g34750.1	ABC1 family domain containing protein, putative, expressed
Os001225_01	A	76.3116	A	70.6771	A	71.5158	P	184.43	P	182.105	A	119.179	P	130.241	P	193.422	A	138.982	A	42.3848	A	54.4569	A	51.0607	A	-29.3216	A	67.5191	A	223.332	A	84.7829	A	95.1403	A	109.949	-	-
Os001228_01	P	290.624	P	351.647	P	576.718	P	392.056	P	320.983	P	269.338	P	266.277	P	257.197	P	291.344	P	206.909	P	207.679	P	237.269	P	644.06	P	495.799	P	262.837	P	184.082	P	162.809	P	238.566	LOC_Os07g04280.1	expressed protein
Os001234_01	A	43.0482	A	40.5151	A	41.0684	P	209.675	A	128.475	A	91.7864	A	76.5062	A	74.1551	A	291.623	A	45.2193	A	54.7464	A	68.3151	A	-15.7449	A	2.6921	A	26.3291	P	189.254	A	45.5583	P	137.502	LOC_Os08g05870.1	oxysterol-binding protein-related protein 6, putative, expressed
Os001235_01	A	98.2085	A	58.8383	A	82.7089	P	237.11	P	207.065	P	172.07	P	140.445	A	125.17	P	203.47	A	61.9427	A	75.5525	A	83.8482	A	32.5457	A	94.241	A	129.335	P	139.416	A	121.093	A	117.074	-	-
Os001238_01	A	63.331	A	52.1396	A	58.9287	P	720.939	P	411.732	P	167.009	A	107.639	P	307.758	P	312.817	A	125.602	P	190.967	P	152.995	A	122.776	A	131.986	P	253.728	P	153.825	P	182.267	P	184.55	LOC_Os04g39210.1	agmatine deiminase, putative, expressed
Os001240_01	P	513.971	P	322.154	P	219.187	P	218.809	P	225.849	P	125.067	A	313.595	P	610.724	P	718.513	A	40.8744	A	33.5286	A	36.5072	A	6.14372	A	16.1959	A	23.9641	A	61.9302	A	-67.5912	P	102.939	LOC_Os08g02190.1	expressed protein
Os001242_01	A	111.598	A	64.0927	A	71.5015	P	206.792	P	193.174	P	170.145	P	171.566	P	140.302	P	173.098	A	51.3216	A	61.1288	A	65.6972	A	35.5603	A	30.6701	A	53.7598	P	152.515	A	111.688	A	83.9035	LOC_Os01g08630.1	hypothetical protein
Os001245_01	P	42914.1	P	33668.9	P	45264.2	P	33231	P	21546.1	P	19512.8	P	34969.8	P	45511.9	P	35034.6	P	50316.7	P	48500	P	47831.7	P	34857.1	P	35199.6	P	28426.4	P	42206.7	P	45481.1	P	41052.5	LOC_Os03g47530.1	glycosyl transferase 8 domain containing protein, putative, expressed
Os001246_01	A	55.608	A	61.1228	A	76.2245	P	210.279	P	234.826	P	221.048	P	210.149	P	198.203	P	171.388	P	111.725	A	117.216	A	122.437	A	25.8187	A	44.1583	A	47.2259	A	77.0417	A	110.22	A	97.6342	LOC_Os01g15448.1	expressed protein
Os001248_01	P	755.689	P	799.937	P	1017.69	P	1143.15	P	920.193	P	1221.43	P	1286.16	P	1465.31	P	1150.69	P	1302.24	P	1754.52	P	2036.4	P	1036.27	P	1280.31	P	1733.84	P	1678.41	P	2477.06	P	1395.39	LOC_Os05g48330.1	aspartyl protease family protein, putative, expressed
Os001251_01	P	2401.02	P	2565.83	P	1328.2	P	1838.06	P	2242.52	P	2114.09	P	864.495	P	1110.94	P	908.069	P	627.737	P	641.176	P	433.127	P	561.279	P	551.091	P	476.346	P	1010.1	P	805.75	P	1010.85	-	-
Os001255_01	A	71.2786	A	52.5434	A	55.9534	P	176.424	P	181.884	P	154.802	A	117.985	A	128.47	A	139.444	A	39.1802	A	44.8724	A	69.2195	A	-10.3881	A	74.7667	A	171.673	A	115.115	A	104.324	A	100.703	LOC_Os01g02760.1	receptor-like kinase, putative, expressed
Os001259_01	A	131.535	A	129.587	A	115.905	P	598.29	P	381.837	P	243.872	P	352.38	P	382.509	P	422.312	P	338.231	P	280.116	P	276.286	P	326.461	P	281.598	P	232.311	P	155.648	P	229.637	P	320.852	LOC_Os02g28340.1	transferase family protein, putative, expressed
Os001260_01	P	119.964	A	102.878	A	94.4279	P	269.528	P	277.352	P	220.162	P	155.68	P	176.588	P	137.539	A	98.3024	A	86.041	A	99.9515	A	49.4688	A	62.9971	A	47.4415	A	101.944	A	104.639	P	131.842	LOC_Os06g15910.1	potassium transporter, putative, expressed
Os001265_01	A	72.2337	A	73.5879	A	77.4568	P	374.014	P	412.42	P	537.352	P	366.792	P	298.771	P	230.344	P	164.701	P	214.471	P	288.442	A	94.2959	P	192.414	P	256.228	P	222.921	A	188.15	A	140.1	LOC_Os03g17180.1	ABC transporter, ATP-binding protein, putative, expressed
Os001266_01	A	73.5827	A	54.0825	A	80.3886	P	242.506	P	187.516	P	217.667	A	86.1017	P	146.131	A	117.978	A	43.9306	A	69.1273	A	84.2717	A	35.0347	A	62.2055	A	40.3433	A	86.1977	A	83.3036	A	88.0719	LOC_Os02g51840.3	expressed protein
Os001267_01	A	52.294	A	61.979	A	46.4524	P	194.596	P	153.544	A	159.255	A	148.528	P	159.434	P	134.181	P	435.8	A	179.534	A	70.1209	A	85.2529	A	65.9641	A	61.8434	P	165.204	P	155.448	P	192.142	LOC_Os07g27460.2	serine/threonine-protein kinase 19, putative, expressed
Os001268_01	A	87.6499	A	90.0834	A	63.5504	P	307.754	P	356.174	P	303.416	P	299.811	P	218.936	P	229.591	P	130.616	A	97.3909	A	115.052	A	49.9102	A	60.4935	A	46.0392	A	86.9157	A	103.772	A	102.389	LOC_Os02g01440.1	nitric oxide synthase 1, putative, expressed
Os001270_01	A	80.9856	A	86.6877	A	78.5366	P	185.612	P	162.251	A	137.132	P	254.741	P	281.621	P	185.279	A	74.2925	P	134.627	P	131.968	A	36.3694	A	43.2934	A	41.9462	A	60.3673	P	127.545	A	75.0331	LOC_Os07g20410.1	expressed protein
Os001272_01	A	119.939	P	140.345	P	167.869	P	435.621	P	384.416	P	438.931	P	243.097	P	489.953	P	411.503	A	150.927	P	294.927	P	214.885	P	172.762	P	207.592	P	219.385	P	219.387	P	295.088	P	206.506	-	-
Os001275_01	A	63.0626	A	59.5346	A	77.5463	P	297.591	P	317.356	P	370.827	P	291.856	P	231.29	P	284.007	P	194.414	P	209.612	P	216.042	P	166.372	P	190.807	A	133.792	A	112.634	P	171.685	P	177.689	LOC_Os03g05830.1	transposon protein, putative, CACTA, En/Spm sub-class, expressed
Os001277_01	A	101.245	A	86.6704	A	104.261	P	724.178	P	459.921	P	531.49	P	367.814	P	653.803	P	520.516	P	327.539	P	422.895	P	663.814	P	359.683	P	352.751	A	226.203	P	243.425	P	356.4	P	273.969	LOC_Os03g16910.2	SLT1 protein, putative, expressed
Os001281_01	P	167.481	A	138.11	A	104.742	P	585.059	P	513.231	P	538.528	P	467.35	P	492.111	P	409.558	P	334.707	P	430.25	P	416.983	P	288.591	P	353.763	P	440.99	P	215.127	P	287.694	P	308.658	LOC_Os07g06300.1	ethylene-insensitive protein 2, putative, expressed
Os001284_01	P	333.887	P	294.264	A	207.241	P	194.06	P	254.986	P	162.092	A	139.01	P	247.276	P	286.034	A	49.7175	A	34.5961	A	59.8669	A	6.43192	A	40.9844	A	49.7494	A	50.0633	A	85.1367	A	62.5579	-	-
Os001286_01	P	250.912	A	162.75	A	82.49	P	246.291	P	220.011	P	202.013	P	239.467	P	245.95	P	281.342	A	103.524	P	139.207	A	104.891	A	39.4879	A	68.4209	A	95.0612	A	80.8935	A	-115.317	A	117.711	LOC_Os08g06520.1	expressed protein
Os001287_01	P	172.386	A	105.573	A	72.9766	P	203.542	P	196.463	P	189.387	P	215.634	P	235.953	P	257.712	A	67.5281	A	91.7804	P	147.958	A	36.4583	A	42.0871	A	64.4665	A	60.6192	A	83.761	A	77.2671	LOC_Os06g46240.1	BTB/POZ domain containing protein, putative, expressed
Os001288_01	P	627.813	P	415.651	P	204.119	P	276.979	P	296.878	P	258.172	P	437.037	P	390.912	P	463.901	P	110.183	P	127.423	P	156.675	A	77.6655	A	78.5063	A	82.5305	A	128.839	P	122.22	P	148.611	LOC_Os07g31260.1	expressed protein
Os001290_01	A	65.8796	A	71.6768	A	61.379	A	123.266	A	174.135	A	130.637	A	78.661	A	96.0585	P	133.769	A	446.018	A	170.929	A	38.6817	A	5.71031	A	77.2485	A	156.134	A	70.3471	A	84.7342	A	88.3103	LOC_Os04g57630.1	phytosulfokine receptor precursor, putative, expressed
Os001296_01	A	93.3366	A	75.2869	A	58.0093	A	137.488	P	135.959	A	131.205	A	100.742	P	146.506	P	142.58	A	602.059	A	216.647	A	48.313	A	25.4957	A	66.7951	A	125.137	A	69.5977	A	78.1696	A	84.76	LOC_Os01g20860.1	phospholipase D. Active site motif family protein, expressed
Os001298_01	P	349.323	P	458.151	P	541.561	P	564.151	P	482.545	P	403.448	P	605.629	P	416.191	P	394.325	P	558.249	P	615.37	P	627.842	P	581.791	P	546.822	P	480.95	P	539.806	P	431.372	P	487.002	LOC_Os06g35200.1	receptor-like kinase, putative, expressed
Os001300_02	A	106.886	A	86.6512	A	84.4971	A	134.98	P	166.452	A	143.407	A	133.322	P	202.033	A	140.97	A	37.2102	A	65.4529	A	69.0266	A	-3.94882	A	14.208	A	62.3858	P	138.902	A	115.513	A	80.702	-	-
Os001301_01	P	406.289	P	377.554	P	530.07	P	1143.42	A	486.786	A	6.43056	P	722.384	P	750.825	P	767.752	P	792.938	P	850.203	P	854.91	P	812.98	P	765.765	P	779.146	P	707.122	P	910.114	P	836.865	LOC_Os03g43440.1	CAMK_KIN1/SNF1/Nim1_like.17 - CAMK includes calcium/calmodulin depedent protein kinases, expressed
Os001303_01	P	324.671	P	243.755	P	195.282	P	215.413	P	233.637	P	194.473	P	352.082	P	387.717	P	320.35	P	114.208	P	140.625	P	170.727	A	57.872	A	69.3193	A	39.8763	A	169.144	P	193.221	P	201.226	LOC_Os07g25460.1	ankyrin repeat domain containing protein, expressed
Os001305_01	A	72.4885	A	73.753	A	68.1583	P	179.943	P	178.846	A	121.71	P	121.225	P	182.046	A	158.219	A	34.013	A	45.714	A	45.5163	A	3.81061	A	5.20846	A	-6.54154	A	85.3141	A	100.214	A	90.9816	-	-
Os001308_01	A	78.3705	A	67.184	A	53.8876	P	268.149	P	209.303	P	234.179	P	338.647	P	478.553	P	250.58	P	183.794	P	248.52	P	284.675	A	66.8256	P	121.26	A	103.105	P	218.988	P	211.159	P	218.532	LOC_Os02g40810.1	Zinc finger, ZZ type domain containing protein, expressed
Os001311_01	P	394.443	P	404.624	P	428.427	P	668.772	P	546.24	P	404.877	P	433.543	P	434.035	P	619.302	P	414.12	P	378.756	P	411.831	P	500.536	P	437.147	P	361.454	P	299.789	P	301.761	P	448.772	LOC_Os01g56910.1	expressed protein
Os001314_01	P	151.619	A	130.17	A	86.939	P	235.32	P	275.649	P	229.084	P	303.965	P	298.857	P	221.687	A	85.737	P	186.792	P	223.792	A	51.8202	A	66.6886	A	104.052	P	135.718	P	144.006	A	112.253	LOC_Os02g06570.2	CAMK_KIN1/SNF1/Nim1_like.13 - CAMK includes calcium/calmodulin depedent protein kinases, expressed
Os001315_01	P	135.027	A	139.041	A	107.026	P	282.404	P	289.355	P	294.097	P	213.051	P	215.947	P	227.082	A	110.818	P	141.159	P	175.688	A	104.448	P	135.438	P	140.945	P	180.113	P	214.01	P	198.222	LOC_Os11g37900.1	3-ketoacyl-CoA synthase, putative, expressed
Os001317_01	A	85.1397	A	102.322	A	62.0594	P	298.205	P	424.042	P	367.104	P	506.324	P	403.855	P	317.963	P	249.25	P	191.285	P	238.337	P	275.48	P	245.833	A	56.0219	P	197.725	P	204.717	P	329.668	LOC_Os08g15500.1	expressed protein
Os001320_01	A	61.8845	A	48.0238	A	61.5653	P	148.328	P	174.922	P	144.028	P	220.124	P	211.137	A	137.411	A	66.7276	A	102.467	P	130.231	A	11.6266	A	25.1962	A	38.1904	A	99.0654	P	113.582	A	118.741	LOC_Os01g68060.1	copine, putative, expressed
Os001322_01	P	346.725	P	285.584	A	100.25	P	221.587	P	202.509	A	104.412	P	308.633	P	261.6	P	182.534	A	124.104	P	303.007	P	382.11	A	75.6132	A	68.9166	A	86.5594	A	87.6335	P	247.319	P	303.711	LOC_Os11g10090.1	transposon protein, putative, CACTA, En/Spm sub-class, expressed
Os001323_01	A	62.6207	A	51.2592	A	67.8067	P	239.237	P	226.378	A	138.359	A	101.649	P	164.374	P	183.206	A	66.1722	A	81.3165	A	77.7488	A	19.9187	A	30.3099	A	33.6002	A	91.617	A	107.772	A	138.899	LOC_Os02g17990.1	Leucine Rich Repeat family protein, expressed
Os001324_01	P	384.213	P	309.143	P	234.497	P	241.485	P	233.285	P	145.805	P	220.885	P	256.766	P	312.629	P	111.463	A	97.0448	A	87.3779	A	63.7576	A	59.4722	A	56.7135	P	185.702	P	162.347	P	191.359	LOC_Os03g11600.1	YABBY domain containing protein, putative, expressed
Os001325_01	P	101.978	A	100.545	A	86.3982	P	262.733	P	208.819	P	164.326	P	131.027	P	154.141	P	214.212	P	112.794	A	98.8282	A	94.6963	A	37.5104	A	45.2941	A	53.2557	A	109.414	P	137.29	A	126.964	LOC_Os07g07920.1	LTPL100 - Protease inhibitor/seed storage/LTP family protein precursor, expressed
Os001326_01	A	118.126	A	101.442	A	112.133	P	204.092	P	207.593	A	123.429	P	200.044	P	198.014	P	232.548	A	41.5615	A	45.7254	A	49.3906	A	30.976	A	19.0108	A	8.68995	A	73.7584	A	99.8375	A	91.6008	-	-
Os001328_01	A	99.0648	A	90.427	A	94.1043	P	548.979	P	405.258	P	391.503	P	204.275	P	248.604	P	341.1	A	85.7905	A	140.844	P	195.954	A	71.2948	P	108.165	A	109.938	P	229.003	P	323.075	P	327.18	LOC_Os11g01190.1	expressed protein
Os001329_01	A	60.8013	A	57.599	A	44.0738	P	286.035	P	243.487	P	177.319	A	192.67	P	273.87	P	342.884	A	93.8064	A	102.473	P	134.266	A	92.493	A	105.244	A	107.919	A	93.4932	P	115.865	P	161.75	-	-
Os001330_01	A	79.7035	A	82.8963	A	82.2507	P	1206.17	P	892.459	P	1036.17	P	1147.47	P	1613.19	P	923.107	P	465.132	P	461.143	P	528.993	P	431.982	P	502.437	P	402.907	P	364.019	P	370.779	P	536.399	LOC_Os05g33290.1	uncharacterized conserved membrane protein specific to cyanobacteria, putative, expressed
Os001332_01	P	199.811	P	156.5	P	229.283	P	132.542	P	169.216	A	127.481	A	90.1196	A	94.1566	P	164.347	A	24.5522	A	28.4652	A	38.2925	A	13.1893	A	12.4216	A	3.74433	A	58.2313	A	63.4909	A	65.7717	LOC_Os07g44360.1	serine/threonine-protein kinase Haspin, putative, expressed
Os001338_01	A	76.8188	A	46.5885	A	50.9597	P	204.674	P	210.14	P	155.156	P	216.285	P	202.181	P	178.905	A	80.242	P	168.564	P	160.306	A	66.7243	A	66.1758	A	37.4253	A	100.431	A	106.584	A	100.79	LOC_Os05g34900.2	wound-responsive family protein, putative, expressed
Os001339_01	A	53.888	A	57.9324	A	71.2857	P	234.859	P	229.952	P	141.432	P	190.792	P	216.669	A	150.407	A	45.6663	A	87.2169	A	99.0923	A	32.82	A	40.5847	A	39.6622	A	106.659	A	107.607	A	83.6104	LOC_Os05g02190.1	expressed protein
Os001345_01	A	77.7055	A	74.7811	A	79.8172	P	186.842	P	220.881	P	169.548	P	280.608	P	171.468	P	184.336	A	62.417	A	121.322	P	162.489	A	87.3342	A	51.7926	A	52.8038	A	111.164	P	131.974	A	69.6022	LOC_Os04g52970.1	NBS-LRR disease resistance protein, putative, expressed
Os001346_01	P	579.618	P	401.663	A	139.984	P	599.94	P	736.534	P	767.813	P	737.805	P	604.809	P	386.784	P	398.519	P	671.831	P	909.521	P	384.49	P	408.125	P	402.308	P	458.405	P	343.228	P	287.626	LOC_Os08g15230.1	heat shock protein-related, putative, expressed
Os001355_01	P	1168.79	P	1167.07	P	1585.78	P	6236.83	P	7574.94	P	7285.49	P	6128.74	P	2199.05	P	4228.25	P	6053.6	P	5015.48	P	6337.96	P	4531.23	P	4577.66	P	3827.88	P	4069.36	P	4122.3	P	4882.24	LOC_Os07g48460.1	stress responsive protein, putative, expressed
Os001367_01	P	154.15	P	174.794	P	220.613	P	328.962	P	286.867	P	276.872	P	192.97	P	196.284	P	282.317	P	276.016	P	310.849	P	324.537	P	346.78	P	296.805	P	263.96	P	273.098	P	313.032	P	308.889	LOC_Os11g40590.3	DUF1399 containing protein, putative, expressed
Os001369_01	P	254.743	P	219.883	P	167.98	P	174.278	A	136.771	A	99.5987	P	218.068	P	216.108	P	276.751	A	35.2255	A	38.3685	A	48.8227	A	1.74023	A	9.21361	A	6.57128	A	61.4903	A	70.9573	A	60.2486	LOC_Os12g01770.1	protein phosphatase 2c, putative, expressed
Os001372_01	A	69.6423	A	70.3304	A	64.346	P	248.44	P	245.652	P	203.412	P	214.839	P	190.697	P	200.838	A	79.1477	A	83.4374	A	96.4651	A	19.6335	A	31.5449	A	23.3867	A	100.881	P	145.514	A	127.546	LOC_Os05g04370.1	expressed protein
Os001373_01	P	196.459	P	210.949	A	123.46	P	408.499	P	472.154	P	330.359	P	306.839	P	280.046	P	385.124	P	195.268	P	198.928	P	198.899	P	223.71	A	128.15	A	101.715	A	126.782	P	149.384	P	184.409	LOC_Os03g22060.1	uroporphyrinogen decarboxylase, putative, expressed
Os001374_01	P	478.5	P	383.152	P	255.314	P	400.85	P	318.645	P	311.132	P	312.19	P	432.483	P	418.99	P	459.359	P	503.828	P	362.364	P	972.703	P	581.339	P	325.278	P	393.607	P	483.582	P	480.706	LOC_Os03g32100.1	spotted leaf 11, putative, expressed
Os001375_01	A	95.9683	A	81.4238	A	78.5643	A	235.183	P	161.578	P	143.955	P	189.378	P	212.382	A	170.753	A	36.8435	A	38.706	A	52.5763	A	8.32961	A	31.1695	A	32.7767	A	81.6871	A	93.4259	A	100.598	LOC_Os11g45250.2	ribonucleases P/MRP protein subunit POP1 containing protein, expressed
Os001376_01	A	96.0151	A	112.708	A	77.8473	P	191.918	P	168.401	P	145.473	P	172.689	P	147.085	P	183.657	A	98.3786	A	84.3494	P	109.349	A	50.1066	A	40.2051	A	36.7784	A	67.4924	A	80.4316	A	119.682	LOC_Os03g09070.1	leucine rich repeat domain containing protein, putative, expressed
Os001377_01	P	911.613	P	1050.64	P	1307.65	P	1036.33	P	573.219	P	831.59	P	1045.11	P	3349.24	P	1597.11	P	2482.93	P	2843.65	P	2440.32	P	1914.25	P	1578.58	P	2139.26	P	1597.33	P	1907.21	P	2182.4	-	-
Os001380_01	A	118.131	A	96.0944	A	94.4281	P	227.654	P	177.596	P	164.06	P	191.657	P	178.002	A	165.53	A	57.8451	A	69.9256	A	87.4858	A	39.5765	A	48.7187	A	40.3263	A	82.202	A	90.1504	A	103.643	LOC_Os03g21230.1	leucine-rich repeat family protein, putative, expressed
Os001383_01	A	49.9251	A	74.8064	A	64.2936	P	636.443	P	677.689	P	764.048	P	714.898	P	700.429	P	393.402	P	594.459	P	603.988	P	573.893	P	848.712	P	545.273	P	301.012	P	172.913	P	235.538	P	304.512	-	-
Os001385_01	P	323.02	P	421.406	P	542.32	P	1923.73	P	3753.08	P	3466.03	P	4753.49	P	1232.83	P	1189.3	P	1866.32	P	2630.78	P	3975.17	P	2531.46	P	1909.55	P	1094.5	P	2029.4	P	1939.92	P	1625.83	LOC_Os02g05470.1	CCT motif family protein, expressed
Os001387_01	A	120.354	A	88.4448	A	64.8832	P	263.734	P	223.431	P	195.274	P	179.728	P	224.361	P	228.498	A	70.5648	A	142.584	A	130.08	A	103.983	A	81.8146	A	108.275	A	119.952	P	157.148	A	116.842	LOC_Os03g57300.2	expressed protein
Os001390_01	P	152.765	A	87.3966	A	61.9821	P	171.014	P	228.087	P	169.084	P	166.796	P	163.726	P	199.03	A	75.8231	A	95.6612	A	100.595	A	36.07	A	38.0199	A	34.8122	A	66.5148	A	78.2531	A	65.5845	LOC_Os06g20620.1	OsMan07 - Endo-Beta-Mannanase, expressed
Os001391_01	A	54.9451	A	47.354	A	55.3892	P	169.416	P	197.612	P	159.307	P	190.837	P	167.042	A	141.039	A	49.0261	A	94.8891	A	123.134	A	36.314	A	41.5247	A	31.377	A	92.0009	A	96.6678	A	77.2548	LOC_Os07g46620.1	WD repeat-containing protein 55, putative, expressed
Os001398_01	P	374.626	P	264.837	P	222.497	P	373.248	P	419.601	P	354.973	P	386.473	P	306.655	P	305.708	P	149.242	P	151.793	P	183.766	P	112.287	A	83.5955	A	53.0319	P	172.076	A	153.732	P	167.799	LOC_Os05g24880.1	dehydrogenase, putative, expressed
Os001400_01	A	42.4139	A	33.2164	A	37.7331	P	179.871	A	110.907	A	78.8211	A	105.084	P	155.962	P	143.447	A	65.3292	A	65.4027	A	60.0803	A	-0.43189	A	6.48489	A	-3.79137	A	95.9922	A	84.2134	A	110.461	LOC_Os02g40260.1	uncharacterized protein At4g06744 precursor, putative, expressed
Os001404_01	A	133.474	A	99.5312	A	151.48	P	243.379	P	250.13	P	217.447	A	115.542	P	152.641	A	154.055	A	98.8647	P	152.873	P	199.175	A	46.2162	A	33.3158	A	21.9269	P	154.5	A	106.217	P	144.678	LOC_Os01g25189.5	delta14-sterol reductase, putative, expressed
Os001409_01	P	160.497	A	118.869	A	86.8816	P	261.369	P	267.534	P	227.8	P	369.228	P	261.039	P	256.881	A	99.9745	P	264.761	P	265.553	A	102.278	A	100.108	A	59.3956	A	129.683	P	155.671	A	106.542	LOC_Os07g22220.1	F-box-like/WD repeat-containing protein TBL1XR1-A, putative, expressed
Os001411_01	A	69.9539	A	67.6373	A	71.6729	P	237.208	P	204.191	P	233.546	P	279.8	P	251.556	P	182.327	P	165.51	P	184.472	A	211.436	P	211.193	P	206.411	A	109.576	A	138.59	P	177.113	P	200.146	LOC_Os04g45670.1	src homology-3 domain protein 3, putative, expressed
Os001419_01	P	102.94	A	78.8831	A	56.1936	P	197.71	A	155.978	A	94.5166	A	123.694	A	133.793	P	203.706	A	51.283	A	52.073	A	59.2987	A	4.78006	A	12.3545	A	14.5428	A	89.5912	A	94.8662	A	98.4896	LOC_Os02g10490.1	expressed protein
Os001421_01	P	266.941	P	215.258	P	230.021	P	396.778	P	307.564	P	205.881	P	326.883	P	312.981	P	266.864	P	202.594	P	205.726	P	202.659	P	274.642	P	208.176	A	61.9514	P	187.231	P	188.833	P	220.105	LOC_Os11g08020.1	ankyrin repeat family protein, putative, expressed
Os001422_01	A	75.1798	A	94.5791	A	55.4835	P	261.129	P	200.346	P	134.637	A	116.239	A	111.947	P	227.727	A	72.2495	A	93.7111	A	88.2436	A	88.1744	A	77.0832	A	67.6807	A	77.9666	P	122.168	A	112.767	LOC_Os05g24684.1	structural constituent of ribosome, putative, expressed
Os001425_01	A	52.5443	A	43.303	A	61.7845	P	195.93	P	187.176	P	126.411	A	81.9012	A	115.789	A	134.964	A	59.0884	A	61.5154	A	48.4408	A	16.9754	A	45.6673	A	49.7804	A	69.1261	A	82.834	A	78.0181	LOC_Os08g42950.1	haloacid dehalogenase-like hydrolase family protein, putative, expressed
Os001428_01	P	135.618	P	175.255	A	82.4377	P	372.886	P	388.083	P	290.038	P	343.284	P	231.901	P	217.419	P	244.085	P	187.868	P	248.692	P	436.914	A	150.166	A	72.3017	P	137.542	P	160.375	P	210.947	LOC_Os11g33320.1	OsFBX425 - F-box domain containing protein, expressed
Os001430_01	A	65.1598	A	78.7294	A	78.1484	P	211.945	P	251.582	P	241.84	A	112.4	P	170.169	P	182.201	P	161.594	P	178.031	P	186.892	A	81.6038	A	102.724	A	105.925	P	179.73	P	194.689	P	195.172	LOC_Os05g05560.1	expressed protein
Os001433_01	P	811.376	P	726.702	P	705.138	P	2212.45	P	1606.79	P	1297.4	P	1616.18	P	1408.82	P	1706.48	P	1372.09	P	1443.9	P	1419.22	P	1287.13	P	1472.94	P	1702.42	P	1166.49	P	1254.91	P	1477.67	-	-
Os001438_01	P	581.704	P	711.181	P	732.616	P	823.309	P	997.555	P	730.767	P	502.841	P	579.092	P	774.177	P	776.874	P	975.101	P	1011.21	P	1056.99	P	897.405	P	806.266	P	704.398	P	732.285	P	1064.58	LOC_Os01g41030.1	ribosomal protein L25, putative, expressed
Os001439_01	P	3611.78	P	3707.26	P	3565.59	P	5190.58	P	5756.26	P	5381.18	P	5696.72	P	3947.48	P	3845.31	P	5642.39	P	5974.01	P	6196.47	P	5083.71	P	4686.36	P	4308.64	P	8360.42	P	7334.36	P	5887.25	LOC_Os03g51580.1	helix-loop-helix DNA-binding domain containing protein, expressed
Os001441_01	P	423.906	P	317.156	P	356.05	P	294.464	P	285.106	P	287.923	P	170.155	P	247.384	P	268.664	P	173.412	P	179.478	P	136.65	A	105.829	A	107.355	A	121.222	P	178.554	P	189.917	P	209.495	-	-
Os001443_01	A	54.0481	A	46.2894	A	54.6667	P	155.774	A	127.799	A	85.8646	A	71.3791	A	107.808	A	116.124	A	29.8086	A	33.9053	A	34.4739	A	-3.34108	A	12.028	A	5.63212	A	52.2203	A	68.6737	A	51.8423	LOC_Os01g39600.1	expressed protein
Os001450_01	P	175.415	P	170.389	P	196.055	P	234.366	P	200.682	P	166.195	P	149.922	P	169.631	P	186.954	P	137.95	P	146.45	P	153.703	A	104.616	A	94.5442	A	90.177	P	164.139	P	161.767	P	178.453	LOC_Os10g29310.1	MBTB51 - Bric-a-Brac, Tramtrack, Broad Complex BTB domain with Meprin and TRAF Homology MATH domain, expressed
Os001451_01	A	98.0089	A	68.8585	A	94.6051	P	200.186	P	180.633	A	87.7156	A	123.922	A	108.939	A	137.009	A	41.4756	A	40.2064	A	30.6658	A	24.6581	A	18.2977	A	3.90058	A	62.15	A	66.7592	A	78.3361	LOC_Os06g11600.3	growth regulator related protein, putative, expressed
Os001454_01	A	68.178	A	69.9128	A	59.8766	P	239.13	P	241.141	P	288.772	P	303.318	P	235.901	P	232.84	P	206.17	P	275.724	P	285.435	A	139.627	A	129.588	A	80.219	A	116.971	P	142.433	A	104.003	LOC_Os03g11240.1	nucleotidyltransferase, putative, expressed
Os001457_01	P	7813.42	P	6593.29	P	4894.03	P	20398.3	P	20346.7	P	19121.2	P	22331.3	P	18048.9	P	12857	P	17437.2	P	20595.4	P	20500.2	P	15858.3	P	15427.8	P	15974.4	P	19985.9	P	18469.6	P	14733	LOC_Os01g22510.1	cyclase/dehydrase family protein, expressed
Os001458_01	P	2733.4	P	2150.45	P	1127.93	P	1523.98	P	2016.35	P	1769.2	P	2091.87	P	1554.76	P	1708.62	P	1373.89	P	1521.17	P	1600.04	P	1789.61	P	1647.73	P	1582.14	P	985.945	P	1175.44	P	1397.71	LOC_Os04g57930.1	thioredoxin, putative, expressed
Os001460_01	P	152.779	P	203.086	P	189.571	P	301.668	P	327.509	P	288.659	P	225.16	P	212.025	P	211.809	P	341.915	P	381.25	P	395.313	P	303.249	P	262.228	P	267.974	P	290.568	P	433.759	P	333.842	LOC_Os11g33970.1	plant protein of unknown function domain containing protein, expressed
Os001461_01	A	88.6001	A	106.391	A	132.98	P	180.374	P	167.764	P	141.481	A	84.6199	A	112.873	P	148.457	A	63.6193	A	84.9505	A	82.0678	A	62.6827	A	69.6001	A	53.2029	A	71.8711	A	97.7818	A	98.9952	LOC_Os10g05660.1	thaumatin, putative, expressed
Os001462_01	A	64.6999	A	48.8423	A	69.3518	P	165.369	P	186.977	P	141.421	P	202.63	P	179.705	P	130.871	A	54.6817	A	91.3694	A	122.078	A	32.296	A	39.7523	A	28.7264	P	149.093	A	112.796	A	94.1718	LOC_Os02g43912.1	ceramide kinase-related, putative
Os001463_01	A	143.435	P	176.593	P	157.802	P	225.549	P	244.842	P	143.595	P	159.708	P	168.625	P	175.444	P	163.696	P	181.165	P	156.894	A	117.14	A	122.418	A	124.208	P	159.796	P	155.184	P	142.85	LOC_Os02g32420.1	protein binding protein, putative, expressed
Os001464_01	A	89.2413	A	95.6031	A	41.6436	A	162.534	A	248.425	A	281.103	A	95.1786	A	104.454	A	129.42	A	47.4077	A	46.5944	A	62.5313	A	25.9049	A	18.7831	A	22.6241	A	73.1162	A	84.0842	A	86.9933	LOC_Os07g13170.2	AP2 domain containing protein, expressed
Os001466_01	P	335.556	P	308.134	P	163.742	P	444.203	P	419.372	P	497.332	P	433.877	P	443.466	P	497.716	P	279.477	P	282.572	P	271.529	P	179.946	P	323.479	P	596.902	P	213.989	P	232.924	P	263.858	LOC_Os02g33730.1	ubiquinol-cytochrome C reductase hinge protein, putative, expressed
Os001468_01	A	85.0651	A	68.8239	A	64.0452	P	400.201	P	421.411	P	400.495	P	415.47	P	333.454	P	316.272	P	202.919	P	275.241	P	316.067	P	183.188	P	157.867	A	116.105	P	169.962	P	184.003	P	185.319	LOC_Os11g01872.1	HEAT repeat family protein, putative, expressed
Os001472_01	P	376.887	P	308.955	A	157.949	P	338.054	P	495.958	P	365.949	P	923.022	P	538.897	P	578.648	P	222.947	P	170.135	P	182.419	A	123.347	A	116.355	A	134.464	P	226.016	P	242.877	P	250.959	LOC_Os09g10760.1	RNA recognition motif containing protein, putative, expressed
Os001473_01	P	148.541	P	174.796	P	152.892	P	1575.13	P	1683.15	P	1802.5	P	817.102	P	769.662	P	817.211	P	1243.49	P	1265.13	P	1163.14	P	676.373	P	865.528	P	802.67	P	444.618	P	501.202	P	681.428	-	-
Os001475_01	A	160.747	P	162.115	A	127.119	P	252.134	P	214.186	P	202.816	P	256.203	P	236.645	A	159.481	A	92.2546	A	92.0057	P	123.163	A	160.172	A	157.615	A	67.4671	A	103.854	P	121.887	A	112.323	LOC_Os04g48520.1	ZOS4-12 - C2H2 zinc finger protein, expressed
Os001482_01	A	81.0801	A	70.8709	A	65.2651	P	211.2	P	220.39	P	202.536	P	234.014	P	234.742	P	182.091	P	173.848	P	180.508	P	188.26	A	104.555	A	76.6422	A	35.3973	A	114.668	P	121.9	A	115.549	LOC_Os11g07970.1	OsFBW2 - F-box domain and WD40 repeat containing protein, expressed
Os001484_01	A	76.0178	A	56.6131	A	70.7781	P	168.246	P	182.81	P	205.629	P	235.77	P	297.828	P	159.541	A	44.3216	A	64.3022	A	90.6254	A	9.27565	A	51.2217	A	73.7719	P	173.33	P	188.108	P	147.984	LOC_Os11g06240.1	ATOZI1, putative, expressed
Os001486_01	P	220.398	P	216.151	P	183.304	P	354.972	P	319.023	P	345.147	P	229.728	P	382.711	P	376.897	P	172.01	P	209.643	P	201.346	P	218.526	P	178.742	P	273.118	P	269.919	P	243.169	P	252.064	LOC_Os03g10140.1	ZOS3-04 - C2H2 zinc finger protein, expressed
Os001488_01	A	79.3089	A	61.8597	A	79.8984	P	353.172	P	260.933	P	243.23	P	194.902	P	360.815	P	242.806	P	207.761	P	241.371	P	252.084	A	76.9844	P	189.096	P	200.737	P	228.217	P	186.616	P	209.21	LOC_Os09g24230.1	haloacid dehalogenase-like hydrolase family protein, putative, expressed
Os001489_01	P	427.181	P	429.219	P	485.846	P	395.665	P	331.472	P	256.954	P	294.521	P	344.323	P	343.688	P	454.199	P	447.809	P	452.088	P	458.411	P	432.884	P	369.857	P	343.6	P	512.682	P	703.3	LOC_Os04g02640.1	3-ketoacyl-CoA synthase 6, putative, expressed
Os001490_01	A	61.0659	A	50.954	A	59.4277	P	296.711	P	249.44	P	216.458	P	205.707	P	261.237	P	225.194	A	90.3205	A	97.893	A	101.844	A	21.9732	A	63.7525	A	64.2816	P	186.13	P	147.77	P	142.582	LOC_Os04g45280.2	histidine triad family protein, putative, expressed
Os001491_01	A	132.989	A	183.965	A	57.3683	P	256.157	P	231.545	P	121.259	A	76.5255	A	108.301	P	191.665	A	45.7506	A	57.9888	A	56.8523	A	58.4254	A	41.1433	A	47.5283	P	184.44	P	160.003	A	100.005	LOC_Os08g44010.5	WD domain, G-beta repeat domain containing protein, expressed
Os001494_02	P	6071.94	P	5846.55	P	7023.41	P	11293.1	P	9532.14	P	8434.83	P	14136.9	P	13171.5	P	9368.04	P	15846.5	P	14392.2	P	13954.4	P	8816.21	P	8800.85	P	8959.75	P	12186.4	P	13543.5	P	13207	-	-
Os001497_01	P	252.985	P	221.325	A	215.228	P	208.354	P	178.162	P	182.366	A	145.958	P	182.663	P	195.849	A	111.374	P	123.777	P	137.226	A	109.661	A	101.521	A	87.5086	A	138.338	P	146.201	P	185.034	LOC_Os03g60570.1	ZOS3-22 - C2H2 zinc finger protein, expressed
Os001498_01	A	73.6333	A	100.071	A	69.6947	P	277.874	P	370.025	P	415.635	P	309.532	P	351.616	P	322.959	P	204.077	P	170.846	A	145.437	P	153.739	A	76.9192	A	64.2974	A	110.017	P	145.965	A	117.831	LOC_Os05g48310.2	60S ribosomal protein L35a-3, putative, expressed
Os001499_01	P	195.173	P	181.151	A	126.279	P	915.217	P	921.546	A	1370.98	P	1165.9	P	984.039	P	971.736	P	715.796	P	801.332	P	983.613	P	591.152	P	611.965	P	500.086	P	299.514	P	343.382	P	485.014	-	-
Os001500_01	P	129.563	A	108.585	A	87.2041	P	180.15	P	188.681	P	144.2	A	99.9073	P	126.852	P	144.907	A	63.0618	A	54.8051	A	66.4346	A	20.4618	A	27.0145	A	28.1173	A	85.3224	A	86.0545	A	78.8422	LOC_Os07g47960.1	basic helix-loop-helix domain containing protein, expressed
Os001501_01	P	460.318	P	311.51	P	146.543	P	208.556	P	196.327	P	204.508	A	254.373	P	229.049	P	234.186	A	59.3849	A	83.1	A	98.4464	A	7.43931	A	35.3282	A	42.2703	A	76.0063	A	82.4138	A	83.3219	LOC_Os03g13560.1	hydroxyproline-rich glycoprotein family protein, putative, expressed
Os001503_01	A	75.6271	A	54.5503	A	53.6782	P	300.602	P	285.467	P	227.638	P	361.652	P	300.151	P	304.623	P	159.958	P	168.984	P	238.662	P	138.516	A	93.8206	A	61.2652	P	186.28	P	149.39	A	150.587	LOC_Os06g02120.1	PPR repeat domain containing protein, putative, expressed
Os001504_01	A	68.9594	A	58.0909	A	64.9442	P	177.148	P	176.548	A	144.474	A	71.5276	A	92.9247	P	125.085	A	62.266	A	83.3769	A	79.972	A	-13.7014	A	4.5448	A	6.47611	A	87.7089	A	93.2119	A	81.3239	-	-
Os001505_01	P	2039.65	P	1268.8	P	693.984	P	314.549	P	347.558	A	684.673	P	2201.25	P	1727.42	P	1999.65	P	158.425	P	201.589	P	235.355	A	119.51	P	131.912	A	70.6905	P	190.666	P	217.696	P	266.944	LOC_Os07g36420.1	proteasome inhibitor-related, putative, expressed
Os001507_01	P	148.08	A	119.284	A	86.3813	P	334.998	P	343.66	P	333.268	P	315.97	P	492.462	P	424.416	A	150.273	P	278.562	P	274.599	P	200.182	P	160.157	P	207.59	P	195.322	P	228.874	P	190.999	LOC_Os02g49080.1	KH domain containing protein, putative, expressed
Os001508_01	P	460.482	P	384.29	A	169.757	P	359.882	P	310.711	P	273.613	P	417.089	P	508.603	P	619.188	P	168.541	P	257.808	P	261.462	P	255.908	P	271.604	P	366.053	P	243.117	P	246.02	P	307.225	LOC_Os03g53050.1	WRKY transcription factor, putative, expressed
Os001510_01	P	9084.2	P	6763.35	P	3804.73	P	4594.23	P	2608.61	P	1606.82	P	3758.94	P	4067.24	P	5605.08	P	6171.16	P	5583.23	P	4947.49	P	4217.97	P	3517.78	P	2592.82	P	3007.77	P	3450.37	P	4692.1	LOC_Os04g21350.2	flowering promoting factor-like 1, putative, expressed
Os001513_01	P	478.289	P	466.003	P	416.45	P	456.564	P	449.959	P	511.901	P	328.718	P	376.46	P	317.333	P	125.977	P	169.622	P	177.606	A	85.2123	A	145.48	P	277.109	P	228.984	P	186.789	P	182.843	LOC_Os04g01230.1	phosphoglycerate mutase, putative, expressed
Os001519_01	P	147.123	A	102.392	A	111.921	P	310.233	P	291.987	P	262.531	P	257.671	P	306.998	P	218.314	A	93.7246	P	151.241	P	164.307	A	73.2646	A	142.17	A	211.43	P	151.275	P	154.553	A	116.138	LOC_Os02g35150.1	splicing factor U2AF, putative, expressed
Os001520_01	A	69.8824	A	108.315	P	213.982	P	301.26	P	274.919	A	299.412	P	189.655	P	304.066	P	375.159	P	187.253	P	218.183	A	197.765	P	276.138	P	259.559	P	217.877	A	144.469	P	198.595	P	267.64	LOC_Os10g36200.1	heavy metal-associated domain containing protein, expressed
Os001521_01	A	85.0723	A	88.119	A	95.4855	P	291.342	P	257.813	P	270.627	P	155.044	P	208.632	P	244.959	P	170.97	P	180.496	P	219.138	P	153.245	P	170.412	P	162.254	A	136.559	P	156.979	P	202.067	LOC_Os08g37140.1	phosphoglycerate mutase, putative, expressed
Os001522_01	A	108.398	A	102.887	P	159.412	P	740.235	P	418.438	P	926.857	P	570.391	P	1097.15	P	510.559	P	458.685	P	632.842	P	662.382	P	451.694	P	494.449	P	487.202	P	555.142	P	621.536	P	362.626	LOC_Os03g45720.1	glyoxalase family protein, putative, expressed
Os001523_01	A	76.012	A	57.7431	A	61.8854	P	201.702	P	239.937	A	284.418	A	56.5115	A	71.2026	A	112.43	A	53.1417	A	65.9341	A	81.0717	A	24.7568	A	51.6202	A	61.4495	A	64.7418	A	71.5967	A	70.9973	LOC_Os07g42520.1	dirigent, putative, expressed
Os001525_01	P	795.45	P	570.137	A	222.829	P	522.322	P	434.817	P	379.667	P	537.766	P	459.701	P	373.067	A	181.364	P	278.315	P	317.664	P	271.944	P	217.185	A	93.4338	P	228.205	P	178.876	P	161.158	LOC_Os06g11380.1	geminivirus Rep-interacting motor protein, putative, expressed
Os001527_01	A	66.3835	A	67.1041	A	63.7761	P	248.725	P	217.915	P	245.237	P	206.277	P	317.331	P	219.085	A	104.431	P	163.841	P	158.117	A	49.8318	A	58.8572	A	61.4369	P	133.856	P	152.849	A	126.852	LOC_Os02g09060.1	BRCA1-associated protein, putative, expressed
Os001528_01	A	87.7348	A	79.0868	A	61.6162	P	216.433	P	205.537	P	279.723	A	88.9722	P	172.877	P	169.401	A	92.8812	A	112.257	A	106.331	A	43.8198	A	54.8373	A	44.2441	A	101.418	P	121.227	P	153.817	LOC_Os03g20090.1	MYB family transcription factor, putative, expressed
Os001529_01	P	1662.99	P	1071.58	P	851.244	P	4277.17	P	3304.41	P	6284.07	P	8202.23	P	14332.9	P	5663.19	P	4725.9	P	7877.47	P	9125.93	P	3512.93	P	3947	P	5091.6	P	4087.19	P	5519.57	P	4625.23	LOC_Os01g60830.1	expressed protein
Os001532_01	P	402.242	P	300.514	P	223.528	P	316.579	P	254.202	P	189.716	P	429.731	P	405.723	P	645.987	A	106.185	P	125.587	P	120.428	P	201.534	P	192.613	A	129.156	P	172.583	P	134.147	A	152.79	LOC_Os08g30810.1	puromycin-sensitive aminopeptidase, putative, expressed
Os001537_01	P	1067.75	P	723.979	P	350.666	P	247.064	P	219.32	P	173.412	P	508.893	P	587.353	P	770.422	P	119.098	P	143.686	P	142.919	A	93.8554	A	96.2844	P	176.185	P	138.801	P	157.911	P	171.706	LOC_Os04g57540.2	adenylate kinase, putative, expressed
Os001539_01	P	175.113	P	159.521	P	147.711	P	367.71	P	358.131	P	318.436	P	367.791	P	300.426	P	332.845	P	217.584	P	216.585	P	195.878	P	156.942	P	206.472	P	224.691	P	225.633	P	224.116	P	228.73	LOC_Os03g17410.1	expressed protein
Os001540_01	A	127.05	A	107.439	A	93.5	P	319.645	P	450.161	P	424.071	P	474.723	P	470.145	P	362.5	P	211.757	P	205.493	P	204.829	A	91.8995	P	133.176	P	143.012	A	116.743	P	152.864	A	138.533	LOC_Os09g32532.2	60S ribosomal protein L32, putative, expressed
Os001543_01	A	64.1503	A	56.9135	A	70.5134	A	132.56	P	158.222	A	107.685	A	94.003	A	84.9147	A	92.3582	A	46.03	A	51.2263	A	63.0385	A	10.9513	A	24.2627	A	40.1779	A	70.6264	A	80.8487	A	68.9138	LOC_Os02g05920.1	phytosulfokine receptor precursor, putative, expressed
Os001544_01	P	1890.81	P	1613.25	P	1077.76	P	664.249	P	669.38	P	627.248	P	878.504	P	907.024	P	906.439	P	611.988	P	788.427	P	836.442	P	673.098	P	670.251	P	575.799	P	581.155	P	734.412	P	680.625	LOC_Os11g12620.1	receptor protein kinase CLAVATA1 precursor, putative, expressed
Os001545_01	P	1077.96	P	778.91	P	223.591	P	236.013	P	272.254	P	287.25	P	618.805	P	714.488	P	708.441	P	179.464	P	197.776	P	202.688	A	91.5394	A	97.2283	A	89.515	A	120.098	P	155.173	P	141.094	LOC_Os06g45510.1	thioredoxin, putative, expressed
Os001547_01	A	100.022	A	76.8999	A	81.3119	P	167.031	P	179.41	P	117.003	A	108.145	P	154.613	P	170.464	A	46.3453	A	43.7158	A	59.5924	A	18.8881	A	26.3904	A	48.4626	A	55.7667	A	65.5787	A	67.159	LOC_Os07g01730.1	WD-40 repeat family protein, putative, expressed
Os001549_01	A	61.9864	A	60.5292	A	113.736	P	232.709	P	189.535	P	163.945	P	206.985	P	213.96	P	154.846	A	104.451	P	143.365	P	143.994	A	62.1455	A	72.912	A	82.4713	A	112.764	P	123.724	P	159.561	LOC_Os01g33060.1	HEAT repeat family protein, putative, expressed
Os001550_01	P	1358.07	P	1198.61	P	1382.62	P	944.434	P	858.907	P	884.181	P	1242.08	P	1103.63	P	1274.69	P	1114.09	P	992.022	P	1217.34	P	1127.33	P	1073.11	P	958.668	P	628.338	P	766.684	P	994.182	LOC_Os12g29220.1	nodulin MtN3 family protein, putative, expressed
Os001551_01	P	1399.87	P	1374.07	P	889.055	P	488.69	P	505.403	P	532.834	P	463.236	P	552.133	P	515.049	P	273.992	P	345.33	P	316.93	P	276.557	P	256.472	P	300.359	P	254.605	P	259.439	P	251.484	LOC_Os05g51560.2	CK1_CaseinKinase_1.8 - CK1 includes the casein kinase 1 kinases, expressed
Os001553_01	A	101.312	A	86.0569	A	61.682	P	185.094	P	193.142	P	190.738	P	145.494	P	175.463	P	156.479	A	58.1824	A	74.6517	A	98.6784	A	-1.79017	A	23.1694	A	36.476	A	103.85	A	94.7531	A	92.7723	LOC_Os10g30750.1	appr-1-p processing enzyme family protein, putative, expressed
Os001554_01	P	425.915	P	367.221	A	212.597	P	241.512	P	226.734	P	144.068	P	291.28	P	338.526	P	439.182	A	66.9433	A	94.4302	A	106.665	A	79.7443	A	84.1402	A	98.8583	A	104.48	P	135.394	A	123.715	LOC_Os02g43040.1	expressed protein
Os001555_01	A	87.8107	A	66.7659	A	69.5812	P	151.613	P	197.956	A	76.6455	P	102.583	A	122.914	P	168.333	A	52.6416	A	52.2291	A	59.7403	A	18.0585	A	19.6306	A	21.5141	A	78.533	A	102.803	A	89.0605	LOC_Os02g07670.1	URED, putative, expressed
Os001559_01	A	58.8985	A	60.2003	A	74.72	P	200.49	A	129.503	A	86.4311	A	168.352	A	163.508	A	183.93	A	31.0742	A	37.2538	A	25.7975	A	-9.29272	A	5.6869	A	-10.6635	A	59.6848	A	86.7687	A	75.7661	-	-
Os001560_01	A	57.7796	A	71.4217	A	47.3163	P	286.895	P	207.536	P	131.181	P	183.613	P	219.012	P	282.109	A	75.1366	A	90.6341	A	110.353	A	78.8711	A	92.6644	P	137.868	A	124.85	P	145.391	P	164.861	LOC_Os07g46690.1	PHD-finger family protein, expressed
Os001562_01	A	44.7969	A	42.2906	A	52.5027	P	207.871	P	231.483	A	84.2121	A	55.8922	A	75.109	A	121.583	A	30.9076	A	20.7589	A	4.90591	A	-3.51259	A	-0.00525161	A	-15.7191	A	51.906	A	79.9763	A	81.2529	-	-
Os001564_01	P	118.865	A	113.049	P	133.099	P	226.963	P	222.147	P	174.795	P	183.526	P	182.854	P	169.097	A	92.7037	A	97.5617	A	92.6813	A	50.8158	A	67.696	A	55.9841	A	119.929	P	126.874	P	157.582	-	-
Os001565_01	P	214.299	P	197.889	P	161.71	P	476.553	P	402.453	P	346.885	P	329.837	P	285.526	P	229.679	P	268.038	P	307.884	P	427.512	P	190.764	P	283.126	A	283.924	P	286.512	P	260.326	P	241.138	LOC_Os02g45000.1	expressed protein
Os001566_01	A	98.9675	A	90.3322	A	82.7014	P	434.374	P	351.494	P	301.796	P	362.386	P	487.917	P	358.692	P	216.703	P	306.912	A	306.821	P	464.71	P	377.447	P	259.434	P	149.521	P	219.283	P	332.714	LOC_Os02g47580.1	expressed protein
Os001568_01	P	5690.48	P	4127.06	P	3046.34	P	2623.09	P	3102.19	P	3054.99	P	5632.89	P	4610.05	P	4026.31	P	4655.39	P	5283.92	P	4446.43	P	3509.75	P	2912.04	P	2797	P	4181.7	P	3663.31	P	3174.77	-	-
Os001569_01	P	117.007	P	145.612	A	125.528	P	561.798	P	807.846	P	847.309	P	1459.2	P	1434.88	P	873.377	P	541.385	P	822.472	P	776.749	P	459.026	P	434.213	P	554.749	P	409.24	P	450.002	P	352.747	LOC_Os05g48320.1	60S ribosomal protein L37a, putative, expressed
Os001572_01	P	391.939	P	337.389	A	99.2282	P	207.648	P	194.924	P	186.281	P	427.863	P	476.361	P	526.467	P	205.461	P	172.862	A	159.67	P	184.778	A	114.301	A	148.134	A	116.927	P	140.262	A	163.68	LOC_Os06g09850.1	25.3 kDa vesicle transport protein, putative, expressed
Os001573_01	P	193.856	A	171.153	A	112.031	P	243.701	P	184.396	P	161.047	P	164.36	P	202.866	P	187.072	A	95.6472	A	110.682	P	131.606	A	17.479	A	56.0652	A	73.5952	P	179.814	P	151.708	A	153.385	LOC_Os06g13600.1	HEAT repeat family protein, putative, expressed
Os001575_01	P	1458.45	P	1002.59	P	425.819	P	196.438	P	182.389	P	152.34	P	513.152	P	546.936	A	546.299	A	81.397	A	115.651	A	109.555	A	12.4232	A	22.2275	A	7.39961	A	86.4446	P	93.5836	A	97.1257	LOC_Os02g03940.1	expressed protein
Os001578_01	A	67.8528	A	56.1392	A	58.6068	P	221.832	P	261.103	P	232.133	P	287.023	P	271.939	P	231.811	P	117.956	P	153.328	A	124.396	A	77.413	A	73.8382	A	96.2512	A	119.994	P	152.08	A	117.16	-	-
Os001579_01	P	353.128	P	343.94	P	721.465	P	3633.76	P	2347.96	P	2886.13	P	2774.73	P	4611.05	P	2008.56	P	2179.32	P	3706.75	P	3024.14	P	1247.41	P	1944.05	P	2808.05	P	1258.08	P	2002.8	P	1043.76	LOC_Os10g36170.1	LTPL160 - Protease inhibitor/seed storage/LTP family protein precursor, expressed
Os001580_01	P	952.239	P	701.772	P	323.134	P	302.912	P	308.89	P	306.694	P	383.001	P	468.202	P	538.501	P	131.75	P	158.536	P	180.419	A	77.8157	A	94.8278	A	122.688	A	104.068	A	123.76	P	161.019	LOC_Os03g43800.2	DIRP family protein, putative, expressed
Os001582_01	A	71.9049	A	74.2463	A	98.4497	P	274.565	P	219.259	P	262.909	P	163.009	P	220.325	P	204.214	A	76.1464	A	94.4426	A	91.8622	A	62.5164	A	80.7421	A	122.327	P	139.004	P	149.859	P	114.958	-	-
Os001583_01	P	180.728	P	179.335	A	130.851	P	208.776	P	194.945	P	150.186	A	114.541	P	146.158	P	201.494	A	73.9507	A	81.8067	A	92.0288	A	51.604	A	50.0604	A	63.0638	A	111.669	P	136.154	A	129.621	-	-
Os001592_02	A	116.096	A	90.488	A	80.8506	P	167.251	P	182.158	A	112.706	A	103.412	P	127.891	P	154.876	A	36.46	A	42.0587	A	44.0179	A	21.3568	A	27.0754	A	8.63945	A	48.3526	A	79.4564	A	66.8502	-	-
Os001593_01	A	107.58	A	84.4089	A	70.2164	P	483.448	P	296.901	P	385.445	P	258.101	P	328.578	P	508.539	A	163.218	P	166.188	P	225.377	P	235.299	P	269.334	P	374.481	P	225.765	P	212.008	P	194.694	LOC_Os01g56360.1	wax synthase, putative, expressed
Os001600_01	P	140.017	A	113.533	A	93.5964	P	289.703	P	254.97	P	148.206	P	179.273	P	233.295	P	236.047	A	119.007	A	136.152	A	144.728	A	78.8638	A	68.9086	A	56.3478	P	243.997	P	253.128	P	267.047	LOC_Os03g15770.3	tyrosine protein kinase domain containing protein, putative, expressed
Os001602_01	P	193.351	A	117.459	A	76.2146	P	234.712	P	227.508	P	145.345	P	178.381	P	174.967	P	243.153	A	72.4188	A	82.7354	A	88.5813	A	18.6965	A	27.9398	A	28.7993	A	115.426	A	59.4798	A	135.696	LOC_Os02g48600.1	expressed protein
Os001604_01	A	70.803	A	45.7074	A	72.5117	P	258.351	P	230.057	P	219.295	P	275.932	P	288.53	P	228.627	A	81.4462	A	109.585	P	146.179	A	30.16	A	41.7096	A	40.486	P	154.115	P	161.915	P	157.009	LOC_Os12g07150.1	amidase family protein, putative, expressed
Os001605_01	P	172.956	P	152.083	P	135.825	P	335.066	P	308.879	P	242.713	P	315.875	P	224.554	P	197.644	A	71.2156	A	76.8109	A	62.6047	A	67.7738	A	49.0587	A	31.1504	P	212.718	A	130.512	A	99.0204	LOC_Os06g09090.4	glutamate receptor 2.8 precursor, putative, expressed
Os001606_01	P	990.523	P	873.887	P	1029.3	P	5164.63	P	3368.3	P	2221.62	P	2483.41	P	3954.82	P	2662.63	P	2209.25	P	2178.92	P	2268.9	P	2052.15	P	1996.53	P	1749.55	P	2191.03	P	3460.6	P	3101.15	LOC_Os06g44450.1	CCT/B-box zinc finger protein, putative, expressed
Os001610_01	A	100.608	A	110.963	A	103.569	P	784.496	P	958.873	P	1016.7	P	626.519	P	689.908	P	655.599	P	553.061	P	626.293	P	649.639	P	447.797	P	434.974	P	393.327	P	443.744	P	438.868	P	455.907	LOC_Os02g45670.1	myb-like DNA-binding domain containing protein, expressed
Os001611_01	A	90.1238	A	105.565	P	156.352	P	321.422	P	324.766	P	376.361	P	176.848	P	201.118	P	246.278	P	140.392	P	176.977	P	199.33	P	132.432	P	158.201	A	162.5	P	206.843	P	171.342	P	159.802	LOC_Os02g40000.3	trafficking protein particle complex subunit, putative, expressed
Os001612_01	A	71.2903	A	97.054	A	127.984	P	230.582	P	217.365	P	196.643	P	194.202	P	183.286	P	198.882	A	79.8629	A	93.8807	A	81.9847	A	76.5576	A	66.741	A	73.1481	A	68.4243	A	99.5612	A	105.575	LOC_Os03g35340.1	expressed protein
Os001616_01	P	162.263	P	175.463	P	164.173	P	567.892	P	513.075	P	406.9	P	509.342	P	489.013	P	402.3	P	369.374	P	289.113	P	335.822	P	254.704	P	222.784	P	189.026	P	256.128	P	241.952	P	363.011	LOC_Os02g03320.1	plant neutral invertase domain containing protein, expressed
Os001620_01	P	146.774	P	158.166	A	121.053	P	258.849	P	290.613	P	341.09	P	253.331	P	380.278	P	206.443	A	104.952	P	106.216	A	103.5	A	65.0306	A	60.2806	A	38.7769	A	123.928	P	168.062	P	127.753	LOC_Os07g16610.1	retrotransposon protein, putative, Ty1-copia subclass
Os001621_01	A	82.6292	A	85.1345	A	110.876	P	651.53	P	606.181	P	682.126	P	905.786	P	919.181	P	395.008	P	312.445	P	437.334	P	677.194	P	283.543	P	275.37	A	148.93	P	440.639	P	348.252	P	231.215	LOC_Os05g47670.1	zinc finger, C3HC4 type domain containing protein, expressed
Os001623_01	A	72.1559	A	90.4359	P	127.677	P	313.122	P	248.708	P	249.583	P	185.007	P	255.342	P	323.754	A	114.576	P	188.891	P	240.209	A	84.3931	P	303.717	P	496.697	P	304.409	P	271.029	P	227.675	LOC_Os02g30460.1	uncharacterized protein MJ0304, putative, expressed
Os001628_01	P	1074.06	P	1027.43	P	803.981	P	916.723	P	985.816	P	928.706	P	1025.72	P	813.694	P	766.678	P	1213.51	P	1151.82	P	1218.84	P	844.842	P	832.127	P	804.634	P	1106.1	P	1179.81	P	1374.15	LOC_Os11g04420.2	AIG2-like family domain containing protein, expressed
Os001631_01	P	129.906	A	92.1044	A	76.442	P	366.275	P	250.325	P	222.3	P	245.893	P	206.446	P	269.388	P	161.068	P	187.603	P	183.471	A	88.4776	A	117.666	A	102.558	P	160.509	A	105.259	P	154.164	LOC_Os03g16700.4	initiator-binding protein, putative, expressed
Os001633_01	A	61.6271	A	42.0006	A	52.1459	P	202.884	P	220.408	P	208.626	P	170.913	P	197.672	P	273.856	P	104.601	A	112.093	P	148.7	A	34.4816	A	35.9142	A	51.2497	A	76.5192	A	105.659	A	106.152	LOC_Os04g21110.1	phosphoribulokinase/Uridine kinase family protein, expressed
Os001636_01	P	5302.68	P	3152.01	P	1384.14	P	355.549	P	332.382	P	323.333	P	1696.76	P	1485.68	P	1681.07	P	336.133	P	327.942	P	307.64	P	158.351	P	212.807	P	215.954	P	340.606	P	406.412	P	446.874	LOC_Os07g04020.1	expressed protein
Os001637_01	P	220.971	P	229.554	P	207.859	P	399.095	P	960.798	P	507.414	P	623.855	P	288.083	P	445.724	P	242.828	P	234.786	P	211.176	P	286.215	P	171.238	A	102.446	A	78.0257	A	99.064	A	127.804	LOC_Os09g23110.1	transporter family protein, putative, expressed
Os001643_01	A	97.3881	A	107.618	P	144.677	P	235.96	P	185.361	P	201.748	P	194.974	P	200.532	P	199.974	A	111.933	A	140.134	P	167.735	A	100.275	A	87.5086	A	73.0834	P	156.946	P	179.232	P	161.053	LOC_Os03g14310.1	expressed protein
Os001648_01	A	76.1594	A	65.2961	A	79.7878	P	182.321	P	186.853	P	124.696	A	92.6563	A	101.285	P	219.262	A	38.2212	A	49.3622	A	69.0391	A	50.2167	A	43.8119	A	26.715	A	63.3289	A	101.034	A	90.5784	LOC_Os06g37640.1	expressed protein
Os001649_01	A	80.7492	A	58.4961	A	50.3639	P	231.97	P	248.992	P	208.446	P	213.965	P	357.213	P	237.624	A	125.497	P	178.439	A	166.673	A	79.3441	A	98.3278	A	102.033	A	148.579	P	207.677	P	201.57	LOC_Os06g51360.1	lysM domain containing protein, putative, expressed
Os001651_01	A	73.5001	A	52.8518	A	59.1125	P	217.124	P	221.832	P	191.439	P	148.786	P	175.994	P	203.702	A	62.604	A	81.3962	A	82.5869	A	37.7745	A	46.5114	A	43.4756	A	74.1325	A	97.3571	P	127.087	LOC_Os02g50640.1	HEAT repeat family protein, putative, expressed
Os001652_01	P	824.15	P	414.849	P	239.224	P	310.137	P	307.073	P	249.909	P	486.234	P	445.514	P	459.862	P	185.096	P	188.503	P	198.841	P	135.784	P	150.819	P	132.292	P	196.689	P	193.924	P	255.531	LOC_Os09g24954.1	double-stranded RNA binding motif containing protein, expressed
Os001653_01	A	96.0055	A	77.0571	A	74.1663	P	349.678	P	281.482	P	367.301	P	139.301	A	127.264	A	164.519	A	82.6703	A	115.952	A	113.921	A	59.6149	A	80.451	A	95.7022	P	256.583	A	101.144	A	96.8639	LOC_Os04g52040.4	TNP1, putative, expressed
Os001655_01	P	322.298	P	200.797	A	119.147	P	203.105	P	213.094	P	179.733	P	262.933	P	324.052	P	413.034	A	69.3715	P	115.149	A	100.464	A	71.9262	A	68.4261	A	115.791	A	129.444	P	142.796	A	91.9648	LOC_Os02g35010.1	STE_MEKK_ste11_MAP3K.9 - STE kinases include homologs to sterile 7, sterile 11 and sterile 20 from yeast, expressed
Os001657_01	A	122.351	A	127.448	A	153.157	P	474.785	P	811.249	P	803.195	P	535.455	P	402.501	P	420.695	P	330.398	P	282.996	P	255.645	P	275.699	P	243.926	P	246.816	P	209.928	P	258.749	P	275.378	LOC_Os07g48090.1	CAMK_KIN1/SNF1/Nim1_like.30 - CAMK includes calcium/calmodulin depedent protein kinases, expressed
Os001658_01	P	146.669	A	96.5846	A	71.5104	P	250.512	P	189.353	P	152.828	A	133.725	P	168.478	P	206.934	A	43.5176	A	52.4992	A	57.0705	A	37.7039	A	100.266	A	138.876	A	77.015	A	87.7273	A	97.2059	LOC_Os06g46400.1	ATCPSF30/CPSF30, putative, expressed
Os001660_01	P	361.073	P	298.441	P	296.149	P	301.847	P	280.291	P	212.686	P	222.42	P	254.903	P	271.738	P	300.373	P	303.024	P	312.654	P	263.345	P	254.578	P	242.739	P	291.241	P	309.771	P	322.405	LOC_Os01g68840.1	CRP6 - Cysteine-rich family protein precursor, expressed
Os001663_01	P	164.642	P	179.057	P	147.624	P	167.029	P	203.024	P	166.123	P	222.428	P	187.828	P	204.205	A	130.416	A	103.363	A	113.548	A	41.1599	A	55.4904	A	34.8564	A	95.5474	A	104.348	A	97.492	LOC_Os11g03670.1	Mpv17 / PMP22 family domain containing protein, expressed
Os001664_01	A	61.5704	A	56.4723	A	64.231	P	201.996	P	212.416	A	122.55	A	118.408	P	160.129	A	135.582	A	62.016	A	49.759	A	45.2435	A	4.37781	A	44.3187	A	37.0447	A	51.3837	A	84.5493	A	85.9594	LOC_Os11g06820.1	transmembrane amino acid transporter protein, putative, expressed
Os001666_01	A	69.9971	A	60.4585	A	56.7237	P	214.847	A	192.259	A	131.192	A	97.0667	P	151.512	P	155.199	A	55.7691	A	79.6589	A	82.8981	A	27.122	A	38.6844	A	53.5164	A	106.972	P	121.465	A	90.3598	LOC_Os04g49680.1	DUF581 domain containing protein, expressed
Os001667_01	P	271.558	A	180.338	A	118.862	P	858.173	P	773.705	P	1307.19	P	888.336	P	1118.16	P	976.778	P	594.556	P	838.303	P	900.897	P	723.453	P	615.374	P	644.515	P	329.177	P	365.14	P	291.96	LOC_Os05g10730.2	ABC transporter, ATP-binding protein, putative, expressed
Os001672_01	P	748.86	P	459.484	P	316.42	P	281.007	P	247.485	P	186.596	P	745.782	P	677.23	P	747.614	P	116.95	P	149.18	A	112.026	A	72.0296	A	72.8739	A	96.5226	A	121.915	P	136.979	A	131.542	LOC_Os03g42220.1	T-complex protein, putative, expressed
Os001673_01	A	75.1867	A	48.2775	A	57.8926	P	218.487	P	244.116	P	146.845	A	104.099	P	125.946	P	148.582	A	82.5793	A	75.751	A	60.0751	A	23.8737	A	31.3354	A	22.9696	A	84.4568	A	99.8773	A	102.25	LOC_Os06g38970.1	expressed protein
Os001674_01	P	442.165	P	353.272	P	327.548	P	468.836	P	519.48	P	475.134	P	882.754	P	694.815	P	662.839	P	656.976	P	573.301	P	526.147	P	391.274	P	344.009	P	339.535	P	381.881	P	455.647	P	550.732	LOC_Os03g54900.2	phytosulfokine receptor precursor, putative, expressed
Os001675_01	A	113.973	P	127.21	A	121.722	P	343.987	P	345.193	P	338.218	P	307.484	P	317.271	P	293.255	P	190.595	P	210.049	P	252.383	P	133.365	P	133.06	P	136.645	P	185.396	P	215.658	P	207.83	LOC_Os03g13380.1	transmembrane 9 superfamily member, putative, expressed
Os001677_01	A	68.7425	A	55.214	A	46.2188	P	216.821	P	175.463	A	124.663	A	120.243	A	123.516	A	149.459	A	85.0984	A	83.8707	A	71.8508	A	38.8787	A	37.6994	A	35.3448	A	85.1363	A	98.552	A	104.693	LOC_Os03g12090.1	expressed protein
Os001678_01	A	48.8896	A	38.9832	A	40.5805	P	192.463	P	168.096	A	112.363	A	113.475	P	144.964	P	165.598	A	60.7467	A	65.7262	A	64.2398	A	22.0315	A	27.6016	A	22.2357	A	77.066	A	96.235	A	71.9823	LOC_Os02g37120.2	expressed protein
Os001679_01	P	155.067	P	146.024	P	143.335	P	672.076	P	485.558	P	577.555	P	466.692	P	614.343	P	511.248	P	411.83	P	366.533	P	338.32	P	297.307	P	282.954	P	233.415	P	245.303	P	308.633	P	368.255	LOC_Os07g45320.1	COX VIIa, putative, expressed
Os001682_01	P	501.771	P	562.489	P	819.263	P	1086.43	P	686.664	P	478.02	P	755.464	P	828.089	P	920.298	P	777.727	P	598.662	P	874.992	P	1531.18	P	1147.01	P	532.247	P	717.592	P	558.595	P	1175.18	-	-
Os001687_01	P	291.289	P	264.962	P	220.09	P	329.081	P	406.325	P	351.878	P	312.195	P	270.227	P	268.423	P	143.311	P	161.565	P	218.369	P	166.353	P	171.174	P	160.662	P	229.514	P	181.244	P	191.27	LOC_Os03g55034.1	expressed protein
Os001694_01	P	115.311	A	108.689	A	80.846	P	563.213	P	895.34	P	811.256	P	532.93	P	677.785	P	547.392	A	234.747	P	735.944	P	1005.75	P	533.068	P	391.377	P	348.582	P	481.353	P	383.353	P	337.28	LOC_Os02g03230.1	membrane related protein CP5, putative, expressed
Os001701_01	P	775.699	P	697.112	P	531.066	P	991.919	P	845.716	P	689.371	P	993.321	P	739.407	P	791.201	P	2111.97	P	1900.88	P	1813.17	P	1432.49	P	1443.25	P	1373.01	P	1767.56	P	1769.6	P	1507.7	LOC_Os05g44400.1	GATA zinc finger domain containing protein, expressed
Os001710_01	A	83.9641	A	91.7764	A	76.2346	P	166.866	P	205.053	P	165.793	P	198.138	P	196.808	P	185.322	A	59.7302	A	84.3677	P	106.292	A	25.1535	A	29.911	A	33.7949	A	79.5604	A	96.8118	A	97.4771	LOC_Os03g56380.1	methyltransferase, putative, expressed
Os001712_01	P	230.102	A	170.133	A	83.831	P	229.363	P	264.195	P	244.786	P	241.551	P	212.787	P	197.361	A	70.9823	P	135.42	A	121.945	A	47.9769	A	60.4007	A	62.3336	P	177.604	P	143.736	A	118.197	LOC_Os04g43150.2	nuclear transport factor 2, putative, expressed
Os001713_01	A	80.0333	A	67.5216	A	65.4837	A	120.717	A	105.502	A	64.3654	A	70.3797	A	89.6977	P	121.658	A	34.0981	A	45.3492	A	53.5118	A	14.2657	A	15.5482	A	16.752	A	64.1348	A	78.2397	A	64.1982	LOC_Os08g39570.1	Leucine Rich Repeat family protein, expressed
Os001714_01	A	55.4062	A	58.0175	A	42.9283	P	146.876	P	160.959	A	143.843	A	74.9538	A	112.759	P	131.237	A	55.4792	A	68.2275	A	76.054	A	8.40404	A	31.0303	A	30.4252	A	66.5127	A	90.1477	A	69.2795	LOC_Os08g02370.1	galactosyltransferase family protein, putative, expressed
Os001715_01	P	646.524	P	395.803	P	460.072	P	1396.93	P	932.412	P	842.728	P	1296.6	P	1746.61	P	1018.14	P	1307.33	P	1753.1	P	1350.53	P	1452.73	P	1817.11	P	1329.01	P	2018.64	P	1997.91	P	1846.65	LOC_Os07g38240.1	ZOS7-05 - C2H2 zinc finger protein, expressed
Os001716_01	A	55.3161	A	73.853	A	133.439	P	205.145	P	232.947	P	216.837	P	296.1	P	277.948	P	160.495	A	72.1058	P	268.907	P	237.697	A	121.234	A	92.6049	A	120.507	A	94.852	A	105.342	A	107.742	LOC_Os02g20950.1	expressed protein
Os001718_01	P	509.469	P	430.641	P	287.853	P	793.162	P	784.27	P	906.504	P	721.95	P	658.723	P	513.71	P	372.892	P	445.066	P	603.348	P	422.47	P	364.6	P	387.269	P	667.941	P	685.428	P	545.991	LOC_Os06g51270.1	1,3-beta-glucan synthase component domain containing protein, expressed
Os001722_01	A	65.503	A	55.6736	A	61.2909	P	299.214	P	279.528	P	245.307	P	515.2	P	566.722	P	734.303	P	157.934	P	164.704	P	233.329	A	85.9043	A	84.162	A	67.2032	A	127.931	P	169.916	P	205.016	LOC_Os07g10256.1	mitosis protein dim1, putative, expressed
Os001726_01	A	69.7621	A	56.202	A	81.2479	P	237.769	A	108.473	A	5.98201	P	170.266	P	136.81	P	179.837	A	64.5556	A	68.4158	A	76.1932	A	23.2134	A	30.1888	A	35.9584	A	63.7728	A	91.9953	A	88.2183	LOC_Os03g49620.5	BRASSINOSTEROID INSENSITIVE 1-associated receptor kinase 1 precursor, putative, expressed
Os001727_01	P	166.476	P	144.316	A	114.557	P	287.169	P	254.644	P	245.545	P	331.448	P	281.662	P	282.665	P	146.254	P	166.94	P	161.596	A	96.8397	P	129.597	A	79.0067	A	111.393	P	168.025	P	181.497	LOC_Os03g44500.1	serine/threonine protein phosphatase, putative, expressed
Os001732_01	A	68.7038	A	75.4153	A	54.3504	P	208.505	P	243.177	A	251.021	A	91.736	A	91.5332	P	123.376	A	49.7895	A	66.4967	A	73.1723	A	15.9381	A	31.5096	A	27.8644	A	57.548	A	107.517	A	104.182	-	-
Os001736_01	P	168.064	A	135.137	A	82.6388	P	270.136	P	314.441	P	294.353	P	301.271	P	262.836	P	219.767	A	119.494	P	235.742	P	262.67	A	114.223	A	119.089	A	127.822	P	228.973	P	225.843	P	161.162	LOC_Os07g10890.1	transcription factor, putative, expressed
Os001737_02	A	66.8615	A	68.6203	A	73.7658	P	233.439	P	181.718	P	171.074	P	151.281	P	176.218	P	145.52	A	122.272	P	152.419	P	129.864	A	96.0285	A	109.091	A	107.148	P	136.514	P	162.123	P	160.221	LOC_Os04g02500.1	G-patch domain containing protein, expressed
Os001738_01	P	102.47	A	103.18	A	104.338	P	1623.77	P	1526.28	P	2937.57	P	1103.02	P	1968.66	P	2381.29	P	1481.87	P	2764.96	P	2457.15	P	1755.81	P	1814.85	P	2203.42	P	1423.81	P	1837.44	P	2021.83	LOC_Os02g41860.2	aquaporin protein, putative, expressed
Os001739_01	P	163.721	A	134.54	P	190.635	P	397.86	P	311.626	P	330.22	P	416.209	P	469.775	P	331.314	P	264.484	P	366.197	P	421.225	P	297.792	P	390.085	P	320.25	P	584.257	P	551.939	P	534.755	LOC_Os03g01770.1	rhodanese, putative, expressed
Os001740_01	A	64.4836	A	54.6078	A	46.8835	P	164.508	A	137.012	A	90.8843	A	94.6408	A	95.9699	A	97.4685	A	22.7415	A	33.9	A	29.0882	A	-3.81809	A	5.97237	A	5.15296	A	62.8701	A	66.8032	A	56.2211	-	-
Os001742_01	P	377.475	P	306.198	A	118.95	P	184.443	A	208.342	A	149.179	A	266.155	P	329.349	P	405.393	A	133.825	A	92.1035	A	80.8688	A	27.6225	A	63.7124	A	57.7827	A	85.8471	A	103.656	A	110.578	LOC_Os05g40980.1	zinc finger, C3HC4 type domain containing protein, expressed
Os001747_01	A	69.7054	A	66.7633	A	97.3994	P	275.308	P	218.274	P	188.921	P	165.335	P	196.974	A	183.403	A	64.7592	A	81.8437	A	87.7727	A	9.20238	A	43.2499	A	33.8916	P	154.654	A	116.17	A	108.254	LOC_Os06g37430.2	expressed protein
Os001748_01	P	220.939	P	216.374	A	259.385	P	359.316	P	311.097	P	257.439	P	348.437	P	302.458	P	256.772	P	793.836	P	726.014	P	573.168	P	427.186	P	440.334	P	428.335	P	395.266	P	480.618	P	546.28	LOC_Os05g11650.1	GIL1, putative, expressed
Os001749_01	P	793.869	P	475.67	P	656.21	P	1252.41	A	376.264	A	37.6383	P	907.666	P	1564.92	P	974.236	P	1232.97	P	1325.97	P	846.843	P	1242.25	P	1469.03	P	981.047	P	1795.66	P	1930.91	P	1947.13	LOC_Os01g65530.1	RNA recognition motif containing protein, putative, expressed
Os001752_01	P	150.291	A	120.266	A	100.538	P	243.402	P	196.645	P	148.969	P	218.805	P	202.327	P	172.05	P	127.399	P	130.035	P	124.885	A	100.814	A	110.778	A	98.8567	P	152.555	P	149.208	P	191.417	LOC_Os07g46480.1	eukaryotic aspartyl protease domain containing protein, expressed
Os001753_01	P	1133.9	P	1042.75	P	742.305	P	908.818	P	1320.31	P	1173.6	P	778.458	P	709.617	P	352.335	P	284.536	P	296.55	P	244.247	P	307.815	P	282.866	P	221.211	P	265.452	P	286.028	P	384.12	LOC_Os08g43410.1	LRP1, putative, expressed
Os001755_01	A	76.8061	A	66.5312	A	76.6006	P	210.268	P	273.507	P	317.358	P	239.059	P	169.97	P	193.594	P	152.264	P	200.671	P	210.407	A	126.818	A	119.579	A	65.0379	P	154.592	P	155.795	A	121.904	LOC_Os06g42810.1	UBA and UBX domain-containing protein, putative, expressed
Os001758_01	P	354.519	P	388.263	P	326.958	P	866.295	P	937.635	P	719.94	P	857.08	P	567.239	P	583.747	P	566.539	P	824.556	P	883.375	P	849.016	P	479.542	P	294.758	P	688.749	P	972.375	P	770.311	LOC_Os04g18790.1	OsFBX126 - F-box domain containing protein, expressed
Os001762_01	P	221.832	P	175.377	P	209.725	P	1078.11	P	801.141	P	743.718	P	1488.45	P	1114.91	P	584.118	P	728.35	P	1363.32	P	1910.51	P	1205.95	P	1085.58	P	694.624	P	1172.45	P	970.706	P	1006.24	LOC_Os05g48760.1	protein of unknown function DUF1421 domain containing protein, expressed
Os001764_01	A	94.5614	A	94.1745	A	59.4667	P	145.933	P	198.329	P	136.697	P	109.029	A	102.107	A	101.32	A	29.5148	A	55.5119	A	70.5943	A	-3.82754	A	26.4378	A	27.8509	A	78.2474	A	88.9946	A	82.4329	-	-
Os001767_01	A	91.8897	A	69.4466	A	62.8683	P	225.37	P	215.575	P	171.444	P	217.571	P	159.327	P	238.234	A	91.2396	A	117.502	A	122.388	A	40.8	A	49.1012	A	60.7497	A	67.6294	A	94.1711	A	91.5204	LOC_Os06g30894.1	expressed protein
Os001768_01	P	130.634	A	104.676	A	88.2092	P	186.068	P	181.572	P	158.742	A	97.7584	P	166.85	P	184.218	A	58.8041	A	60.7231	A	66.4366	A	27.156	A	42.0723	A	28.5391	A	74.4767	A	91.0607	A	90.0508	LOC_Os09g38900.1	transposon protein, putative, unclassified, expressed
Os001769_01	A	94.6753	A	94.1612	A	87.7165	P	273.393	P	235.208	P	187.566	P	170.213	P	202.144	P	217.947	A	54.4829	A	87.3505	A	95.1608	A	33.3807	A	52.7111	A	59.7812	P	135.838	A	116.876	P	113.873	LOC_Os04g57010.1	zinc finger C-x8-C-x5-C-x3-H type family protein, expressed
Os001770_01	P	413.789	P	396.838	P	182.348	P	511.157	P	557.545	P	412.255	P	582.503	P	606.775	P	901.114	P	285.902	P	343.412	P	408.007	P	459.104	P	326.895	P	218.554	P	223.702	P	235.04	P	340.07	LOC_Os03g48920.1	DUF1517 domain containing protein, putative, expressed
Os001774_01	P	177.444	P	163.31	A	91.6422	P	318	P	326.719	P	313.988	A	141.226	P	214.666	P	303.131	A	87.6445	A	94.1678	A	107.885	A	54.2114	A	70.8666	A	58.4713	A	103.23	P	190.383	A	102.635	LOC_Os03g44310.1	initiation factor 2 subunit family domain containing protein, expressed
Os001775_01	P	809.595	P	621.913	P	196.779	P	201.58	P	165.389	P	186.08	P	718.905	P	506.947	P	707.619	A	63.662	A	91.7476	A	80.4041	A	88.6585	A	59.6039	A	45.0943	A	78.9101	A	99.156	A	78.9628	LOC_Os03g14830.1	GHMP kinases ATP-binding protein, putative, expressed
Os001778_01	P	294.15	P	267.226	P	190.353	P	239.895	P	243.114	P	326.834	P	294.686	P	385.375	P	300.216	A	95.4849	P	196.086	P	335.625	A	120.706	P	161.687	A	115.428	P	137.618	P	183.993	A	121.934	LOC_Os03g58010.1	acetyltransferase, GNAT family, putative, expressed
Os001780_01	P	268.908	P	218.282	P	180.43	P	364.262	P	400.372	P	365.723	P	369.758	P	395.211	P	418.727	P	308.663	P	371.076	P	354.267	P	217.103	P	239.281	P	255.1	P	319.657	P	352.264	P	350.647	-	-
Os001782_01	A	79.2585	A	64.066	A	47.8181	P	188.453	A	299.398	P	128.367	A	83.5341	A	88.5088	A	88.9708	A	47.2675	A	44.8824	A	50.1896	A	71.8516	A	48.8753	A	-1.15027	A	51.8305	A	74.1736	A	85.8616	LOC_Os02g40260.1	uncharacterized protein At4g06744 precursor, putative, expressed
Os001783_01	A	82.1999	A	62.8587	A	52.0822	P	224.508	P	250.11	P	286.605	P	206.47	P	154.736	P	187.051	P	145.115	P	188.928	P	179.326	A	106.347	A	76.1346	A	50.5767	A	87.5874	A	86.8196	A	62.1476	LOC_Os11g16540.1	tetratricopeptide repeat domain containing protein, expressed
Os001784_01	P	392.781	P	323.329	P	190.305	P	352.752	P	327.593	P	419.081	P	529.1	P	508.934	P	487.746	P	224.493	P	511.253	P	563.098	P	390.64	P	415.169	P	320.616	P	309.027	P	301.815	P	227.034	LOC_Os05g41180.1	peptidase, T1 family, putative, expressed
Os001786_01	P	171.971	P	149.489	A	134.894	P	278.983	P	248.794	P	259.167	P	190.797	P	327.99	P	230.063	A	144.281	P	166.935	P	175.412	A	123.69	A	74.9331	A	58.3845	P	135.304	P	175.32	P	181.476	LOC_Os02g09980.1	expressed protein
Os001788_01	A	86.7186	A	74.5847	A	63.04	P	202.639	P	195.309	A	135.487	P	176.874	P	176.123	P	222.006	A	61.8685	A	72.2555	A	61.4895	A	36.5244	A	33.2335	A	37.1219	A	73.0032	A	110.022	A	91.9733	LOC_Os05g25450.2	TKL_IRAK_CrRLK1L-1.3 - The CrRLK1L-1 subfamily has homology to the CrRLK1L homolog, expressed
Os001789_01	A	69.9056	A	54.7139	A	69.1894	P	236.207	P	216.061	P	155.804	A	110.34	A	113.504	P	162.504	A	89.1861	A	95.6291	A	68.009	A	18.4058	A	19.5014	A	5.27533	A	82.4025	A	82.8796	A	75.1255	LOC_Os12g44160.2	oxidoreductase, putative, expressed
Os001790_01	P	586.93	P	509.064	P	450.394	P	1268.59	P	1318.65	P	947.661	P	1432.46	P	679.447	P	1055.49	P	1293.97	P	1171.07	P	1188.91	P	930.98	P	922.726	P	516.568	P	672.711	P	728.83	P	976.273	LOC_Os09g28510.1	EF hand family protein, putative, expressed
Os001794_01	P	1585.69	P	1251.42	P	967.552	P	460.896	P	406.475	P	358.112	P	700.87	P	793.632	P	886.639	P	404.219	P	377.235	P	358.355	P	516.325	P	408.662	P	316.304	P	334.098	P	347.953	P	400.505	LOC_Os03g07870.1	expressed protein
Os001796_01	P	726.104	P	528.853	P	231.41	P	268.295	P	261.121	P	237.89	P	580.379	P	568.924	P	585.555	P	151.665	P	153.806	P	179.176	A	47.7971	A	81.3895	P	122.187	A	112.727	A	137.675	P	175.606	LOC_Os04g39629.1	RNA recognition motif containing protein, putative, expressed
Os001797_01	P	249.448	P	257.153	P	291.832	P	292.17	P	280.847	P	240.427	P	236.449	P	265.507	P	259.271	P	240.592	P	237.446	P	225.126	P	254.613	P	226.779	P	188.705	P	262.758	P	247.018	P	284.946	LOC_Os05g49700.1	AP2 domain containing protein, expressed
Os001798_01	A	82.303	A	57.2031	A	78.9139	P	294.105	P	248.164	P	253.568	P	209.544	P	310.835	P	297.057	A	68.6943	A	108.622	A	110.45	A	53.4055	A	76.0059	A	77.3104	P	154.419	A	138.736	A	114.784	LOC_Os06g19690.1	expressed protein
Os001802_01	A	58.6335	A	46.6201	A	60.0338	P	225.984	P	246.212	P	229.696	P	292.307	P	193.614	P	181.276	A	82.8948	P	224.742	P	201.472	A	88.3236	A	77.9354	A	72.154	A	118.928	A	107.91	A	93.4769	LOC_Os11g29390.1	bifunctional dihydrofolate reductase-thymidylate synthase, putative, expressed
Os001803_01	A	56.0604	A	51.5164	A	37.9734	P	224.153	P	237.849	P	209.325	P	367.983	P	238.3	P	202.96	A	72.1756	P	224.21	P	234.63	A	97.2714	A	83.8757	A	72.1352	P	195.428	A	133.904	A	107.467	LOC_Os07g37610.1	B3 DNA binding domain containing protein, putative, expressed
Os001806_01	P	145.923	P	175.733	A	127.557	P	333.59	P	372.721	P	516.994	P	383.038	P	484.433	P	320.374	P	173.027	P	260.856	P	301.959	P	223.634	P	241.783	P	282.66	P	256.103	P	342.585	P	383.113	LOC_Os04g45940.1	transcription factor like protein, putative, expressed
Os001808_01	P	226.536	P	292.188	P	316	P	1490.95	P	2128.6	P	2099.63	P	1414.33	P	1315.16	P	1125.8	P	870.022	P	1103.38	P	1451.41	P	941.254	P	957.709	P	605.092	P	788.433	P	918.59	P	1082.01	LOC_Os12g40840.3	expressed protein
Os001809_01	P	9328.33	P	7726.36	P	4656.8	P	2678.63	P	2627.86	P	2075.9	P	3749.29	P	3674.04	P	3870.03	P	4817.32	P	5375.65	P	5826.7	P	5397.55	P	4306.17	P	3307.55	P	4787.79	P	4943.98	P	5689.59	LOC_Os07g47450.1	flowering promoting factor-like 1, putative, expressed
Os001810_01	A	78.2937	A	57.803	A	60.4493	P	328.877	P	451.199	P	458.964	P	347.437	P	519.364	P	233.723	A	194.665	P	665.967	P	764.668	P	479.086	P	307.93	A	227.306	P	236.113	P	322.178	A	186.1	LOC_Os02g40510.1	response regulator receiver domain containing protein, expressed
Os001813_01	A	116.323	A	109.08	A	73.7867	P	462.514	P	454.96	P	445.375	P	406.298	P	415.887	P	455.768	P	252.308	P	311.97	P	317.933	A	109.06	A	108.363	A	108.241	A	144.574	P	247.891	P	239.437	LOC_Os05g04850.1	RNA recognition motif containing protein, putative, expressed
Os001814_01	A	61.3988	A	58.6181	A	74.9529	P	228.054	P	282.586	P	279.677	P	241.701	P	259.363	P	246.134	A	134.459	P	158.629	P	200.07	A	62.3641	A	98.8436	P	177.27	A	96.2549	P	155.045	P	186.874	LOC_Os04g31620.1	retrotransposon protein, putative, unclassified, expressed
Os001815_02	A	96.1842	A	84.2717	A	84.1205	P	381.607	P	393.899	P	368.343	P	230.444	P	248.851	P	352.876	A	117.067	P	191.759	P	223.495	P	172.462	P	139.735	A	84.9813	P	159.09	A	135.252	P	157.937	-	-
Os001818_01	P	918.045	P	567.895	P	313.042	P	400.116	P	388.313	P	340.645	P	522.103	P	503.21	P	691.444	P	176.058	P	182.383	P	160.442	P	172.139	P	138.155	A	61.2682	A	120.552	P	173.04	P	186.877	LOC_Os05g05240.2	serine/threonine protein phosphatase, putative, expressed
Os001820_01	P	1373.94	P	941.692	P	529.728	P	365.815	P	325.796	P	332.069	P	696.258	P	701.931	P	901.693	P	180.373	P	199.576	P	250.354	P	146.132	P	139.03	A	125.807	P	155.893	P	198.464	P	175.93	LOC_Os02g39010.3	cyclin-dependent kinase G-1, putative, expressed
Os001821_01	P	190.264	A	131.056	A	109.338	P	220.6	P	206.025	P	176.708	A	157.686	P	180.389	P	194.246	A	46.154	A	69.8206	A	65.1188	A	25.9527	A	33.4162	A	35.429	A	85.0519	A	72.6387	A	76.0661	LOC_Os07g45120.1	expressed protein
Os001822_01	P	1400.19	P	1236.05	P	1277.42	P	759.159	P	824.105	P	603.998	P	774.323	P	608.289	P	797.948	P	1351.58	P	1359.18	P	1259.13	P	1771.47	P	1513.6	P	955.225	P	1226.03	P	1194.89	P	1471.26	LOC_Os01g52680.1	OsMADS32 - MADS-box family gene with MIKCc type-box, expressed
Os001823_01	P	123.011	A	105.73	A	66.9652	P	175.487	P	203.972	P	226.118	P	185.472	P	142.07	P	185.993	A	99.3808	A	119.237	A	118.64	A	112.28	A	71.0295	A	29.8075	A	68.5543	A	97.3762	A	104.956	LOC_Os03g52700.1	expressed protein
Os001824_01	A	65.9864	A	78.8753	A	77.0539	P	367.876	P	394.277	P	528.455	P	586.582	P	746.442	P	405.05	P	386.245	P	639.565	P	814.683	P	506.797	P	521.177	P	427.314	P	314.512	P	340.037	P	283.206	LOC_Os12g41220.1	ubiquitin-conjugating enzyme, putative, expressed
Os001825_01	A	45.8752	A	50.8629	A	69.0005	P	174.063	P	196.293	P	136.939	A	89.7055	A	99.9907	P	133.303	A	41.8929	A	54.7218	A	50.8703	A	10.2992	A	19.6939	A	7.77962	A	66.325	A	72.6995	A	54.6354	LOC_Os04g39220.1	expressed protein
Os001827_01	A	77.3779	A	61.154	A	76.8599	P	298.581	P	304.187	P	279.689	P	228.022	P	187.635	A	122.898	A	58.5832	A	134.457	A	156.553	A	80.7278	A	88.2381	A	69.8404	A	111.685	P	139.769	A	73.8047	LOC_Os02g48790.5	AML1, putative, expressed
Os001829_01	P	566.101	P	460.349	P	331.78	P	946.413	P	1087.99	P	1141.37	P	1380.34	P	973.936	P	1019.01	P	830.666	P	1080.09	P	1063.85	P	1228.51	P	1022.08	P	518.701	P	468.688	P	555.582	P	820.336	LOC_Os12g43340.1	actin-depolymerizing factor, putative, expressed
Os001830_01	A	56.1684	A	74.3489	A	77.5663	P	391.796	P	395.152	P	601.832	P	677.02	P	836.59	P	352.152	P	300.493	P	520.418	P	579.402	P	375.401	P	372.864	P	433.899	P	296.58	P	372.496	P	275.298	LOC_Os03g15590.1	eukaryotic translation initiation factor, putative, expressed
Os001831_01	P	6212.52	P	4591.74	P	4846.53	P	6204.71	P	5743.52	P	6081.07	P	7310.75	P	6343.91	P	5960.27	P	11000.8	P	14211.4	P	15846.7	P	10282.8	P	10260.8	P	9953.89	P	12013.2	P	10558.3	P	9681.75	LOC_Os05g34680.2	expressed protein
Os001832_01	P	150.021	P	164.139	P	169.051	P	464.126	P	544.9	P	461.174	P	693.272	P	391.094	P	334.404	P	342.559	P	513.94	P	795.242	P	453.609	P	357.903	P	279.955	P	522.567	P	561.781	P	452.598	LOC_Os02g29960.1	cytochrome P450, putative, expressed
Os001836_01	A	68.7949	A	62.9776	A	40.3102	P	225.574	P	243.132	P	228.03	A	161.754	A	113.462	P	149.244	A	99.4647	A	108.83	A	107.128	A	47.8394	A	48.544	A	34.7413	A	110.351	P	139.256	A	108.281	LOC_Os03g05780.1	4-coumarate--CoA ligase-like 7, putative, expressed
Os001838_01	P	218.024	P	207.394	A	110.27	P	598.964	P	896.125	P	871.359	P	1044.2	P	435.138	P	653.622	P	365.427	P	424.967	P	528.09	P	297.137	P	273.482	P	212.463	P	260.976	P	257.829	P	302.753	LOC_Os03g04440.1	expressed protein
Os001840_01	A	80.2831	A	74.9443	A	104.463	P	227.995	P	232.55	P	146.838	P	136.488	A	135.235	P	222.717	A	64.7537	A	83.0924	A	84.5026	A	104.856	A	82.5905	A	69.0431	A	81.0299	A	95.892	A	129.085	LOC_Os07g09000.1	WD domain, G-beta repeat domain containing protein, expressed
Os001842_01	A	72.6407	A	86.1161	A	80.5282	P	285.791	P	322.57	P	730.924	P	267.802	P	865.456	P	431.78	P	218.651	P	314.942	P	276.11	A	140.035	P	186.415	P	453.374	P	232.616	P	344.084	P	234.656	-	-
Os001843_01	P	332.336	P	283.251	P	171.217	P	244.97	P	287.696	P	299.798	P	446.439	P	506.999	P	364.207	P	148.419	P	202.814	P	179.739	A	114.37	P	139.409	P	207.117	P	135.38	P	182.806	P	166.228	LOC_Os06g11620.1	RNA recognition motif containing protein, putative, expressed
Os001844_01	P	148.84	P	123.241	P	129.714	P	627.314	P	523.612	P	733.197	P	678.648	P	951.449	P	670.235	P	385.772	P	566.451	P	701.029	P	339.578	P	366.902	P	326.782	P	349.284	P	390.212	P	367.645	LOC_Os02g55640.1	proteasome maturation factor UMP1 family protein, expressed
Os001845_01	P	125.85	A	91.3746	A	79.3799	P	288.121	P	260.72	P	319.425	P	225.598	P	233.397	P	326.504	A	92.7937	P	163.69	P	177.858	A	60.8835	A	80.4462	A	105.125	P	157.891	P	145.723	P	143.049	LOC_Os01g13200.1	abscisic acid insensitive 8, putative, expressed
Os001846_01	P	353.573	P	357.345	P	316.932	P	575.348	P	525.679	P	690.989	P	447.886	P	401.183	P	285.291	P	309.86	P	280.208	P	327.41	P	627.159	P	649.565	P	262.204	P	199.349	P	187.574	P	290.405	LOC_Os04g47290.2	amine oxidase, putative, expressed
Os001847_01	P	797.746	P	711.338	P	490.793	P	441.141	P	407.706	P	866.282	P	736.738	P	629.518	P	557.643	P	337.837	P	451.328	P	569.025	P	515.535	P	512.4	P	318.716	P	288.939	P	274.292	P	311.843	LOC_Os08g40110.2	peptidase, putative, expressed
Os001848_01	P	350.133	P	374.304	P	205.658	P	192.473	P	240.446	A	326.596	P	232.911	P	271.501	P	335.472	P	123.111	P	138.049	A	137.798	P	135.734	A	90.8214	A	43.2494	A	98.3284	P	137.495	A	115.538	LOC_Os12g38150.1	osmotin, putative, expressed
Os001849_02	P	215.426	P	229.737	A	104.174	P	262.421	P	361.598	P	385.435	P	321.275	P	200.807	P	178.57	A	73.8767	P	191.353	A	146.256	A	74.9797	A	80.8796	A	91.1066	A	99.9112	P	134.438	A	102.99	-	-
Os001854_01	A	46.857	A	62.8919	A	76.8587	P	441.649	P	359.326	P	388.382	P	578.835	P	544.486	P	285.72	P	271.593	P	395.297	P	510.949	P	487.079	P	372.081	A	167.166	P	290.644	P	271.597	P	313.945	LOC_Os08g25590.3	UPF0041 domain containing protein, putative, expressed
Os001855_01	A	112.816	A	108.844	A	91.8973	P	194.356	P	175.839	P	197.925	P	172.669	P	135.801	P	162.385	A	58.1345	A	67.9592	A	77.407	A	22.9301	A	35.8538	A	40.2291	A	90.6954	A	104.791	A	86.3202	LOC_Os09g35020.1	AP2 domain containing protein, expressed
Os001859_01	P	475.598	P	342.669	P	208.886	P	398.91	P	395.692	P	513.482	P	379.295	P	483.231	P	367.592	P	182.025	P	261.668	P	348.837	A	79.6412	P	142.772	P	215.53	P	150.994	P	159.657	P	167.016	-	-
Os001860_01	P	317.355	P	292.287	P	290.248	P	344.831	P	311.038	P	283.001	P	352.037	P	346.822	P	349.254	P	199.546	P	218.238	P	234.898	P	238.395	P	276.138	P	257.189	P	191.441	P	194.327	P	237.228	LOC_Os01g57460.1	frataxin, putative, expressed
Os001861_01	P	34987.9	P	43524	P	49401.5	P	47604.9	P	50058.9	P	52118.1	P	58097.5	P	56939.6	P	52706.9	P	64204.6	P	61956.2	P	55826.8	P	52928.6	P	54263.8	P	54179.7	P	61220.9	P	62030.6	P	64033.4	LOC_Os11g06770.2	ethylene-responsive transcription factor ERF110, putative, expressed
Os001862_01	P	4375.59	P	2776.84	P	1852.39	P	763.342	P	651.68	P	557.57	P	1865.52	P	2115.3	P	2875.94	P	611.449	P	569.928	P	526.909	P	466.469	P	429.292	P	346.168	P	389.654	P	465.973	P	567.66	LOC_Os01g66320.1	expressed protein
Os001863_01	P	505.108	P	552.212	P	673.278	P	822.979	P	794.086	P	674.746	P	870.608	P	711.207	P	618.333	P	1065.84	P	1023.58	P	806.384	P	955.497	P	765.481	P	738.72	P	642.804	P	792.796	P	799.19	LOC_Os06g45570.1	VQ domain containing protein, putative, expressed
Os001866_01	A	77.6659	A	68.2809	A	84.7732	A	198.764	P	196.418	P	193.593	A	113.386	P	153.986	A	153.156	A	51.8429	A	66.4701	A	67.4378	A	47.4951	A	41.8644	A	37.7259	A	80.8384	A	95.6402	A	101.648	LOC_Os03g10990.1	retinoblastoma-binding protein-like, putative, expressed
Os001868_01	P	401.826	P	365.238	A	141.467	P	228.171	P	259.384	P	230.76	P	423.979	P	380.024	P	403.749	P	112.029	A	111.634	A	132.144	A	96.7056	A	88.8762	A	59.7277	A	96.9916	A	125.659	A	124.621	LOC_Os03g55110.1	26S proteasome non-ATPase regulatory subunit 10, putative, expressed
Os001869_01	A	65.4602	A	63.3388	A	59.3218	P	208.28	P	189.114	P	170.873	P	204.95	P	259.921	P	165.053	A	89.4382	P	160.541	A	142.052	A	38.3233	A	44.6453	A	62.5428	A	110.41	P	146.744	A	91.2021	LOC_Os03g08870.1	expressed protein
Os001870_01	A	57.1487	A	59.1133	A	71.8643	P	297.144	P	243.395	P	252.709	P	578.681	P	558.094	P	372.88	P	227.601	P	290.15	P	395.818	P	169.12	P	201.15	A	128.233	P	226.089	P	284.319	P	202.164	LOC_Os02g28720.1	spotted leaf 11, putative, expressed
Os001871_01	P	288.679	P	324.217	P	241.968	P	880.808	P	1558.95	P	1673.57	P	1929.47	P	1493.25	P	1262.45	P	889.808	P	1555.09	P	1687.7	P	831.133	P	722.147	P	718.888	P	926.129	P	1113.43	P	740.005	LOC_Os02g07890.2	60S ribosomal protein L27a-3, putative, expressed
Os001872_01	P	398.75	P	452.437	P	433.657	P	551.225	P	638.293	P	634.575	P	436.925	P	395.422	P	492.311	P	823.924	P	856.736	P	863.168	P	994.503	P	794.17	P	563.752	P	704.235	P	860.576	P	865.474	LOC_Os02g41510.1	MYB family transcription factor, putative, expressed
Os001873_01	P	41454.4	P	43226.6	P	40564	P	48944.6	P	47819.9	P	48496.1	P	35839.7	P	41802.4	P	48303.6	P	63937.1	P	60784	P	54836.4	P	42898.9	P	45427.4	P	46785.8	P	61219.9	P	60778.4	P	61287.7	LOC_Os05g05820.1	pro-resilin precursor, putative, expressed
Os001874_01	P	303.051	P	354.197	P	463.994	P	393.598	P	377.612	P	423.467	P	383.173	P	384.607	P	433.184	P	517.811	P	671.051	P	765.774	P	496.548	P	591.781	P	627.925	P	458.764	P	545.171	P	711.481	LOC_Os03g36080.1	expressed protein
Os001877_01	P	108.897	A	90.4427	A	88.2049	P	376.044	P	307.877	P	412.583	P	410.272	P	452.632	P	285.572	P	250.603	P	354.822	P	436.118	P	255.527	P	272.051	A	179.101	P	252.548	P	342.999	P	251.268	LOC_Os09g22440.1	expressed protein
Os001878_01	P	114.873	A	74.5683	A	48.2039	P	275.633	P	249.608	P	283.355	A	113.205	P	160.674	P	237.51	A	65.1718	A	85.4614	A	49.9809	A	10.5395	A	62.2033	A	84.5908	P	168.786	P	167.993	P	218.903	LOC_Os05g03390.2	expressed protein
Os001882_01	A	52.5247	A	32.7092	A	54.9174	P	209.542	P	200.744	P	164.801	P	172.107	P	170.731	P	156.577	P	108.914	A	99.6523	A	109.082	A	44.781	A	50.1275	A	56.4918	A	122.075	A	135.169	A	89.8015	LOC_Os11g07850.1	Protein-tyrosine phosphatase domain containing protein, expressed
Os001884_01	A	85.1124	A	56.0644	A	117.315	P	378.522	P	180.494	P	392.734	P	175.368	P	804.886	P	311.639	A	94.127	P	354.817	P	205.889	A	53.4571	P	176.35	P	578.691	P	360.215	P	1304.41	P	239.627	LOC_Os03g60580.1	actin-depolymerizing factor, putative, expressed
Os001890_01	P	8781.33	P	4961.85	P	1825.73	P	2040.05	P	2482.33	P	3504.92	P	4030.11	P	3091.31	P	2015.09	P	1036.76	P	1307.68	P	1545.27	P	971.377	P	1143.42	P	1154.54	P	1314.09	P	1285.93	P	953.403	LOC_Os04g47690.1	HMG1/2, putative, expressed
Os001891_01	P	241.946	P	403.393	P	412.887	P	608.244	P	563.992	P	440.722	P	458.745	P	467.389	P	474.923	P	392.418	P	490.419	P	456.049	P	581.935	P	558.012	P	523.041	P	364.115	P	423.029	P	489.691	LOC_Os09g38740.1	expressed protein
Os001892_01	A	104.254	A	77.5455	A	67.223	P	229.974	P	316.169	P	225.925	P	282.524	P	147.501	P	216.425	A	68.2497	A	93.1745	A	78.2984	A	74.7577	A	48.8734	A	22.1209	A	61.2591	A	80.4722	A	84.8121	LOC_Os01g43020.1	CTP synthase, putative, expressed
Os001896_01	P	490.684	P	632.55	P	799.137	P	2423.74	P	3708.61	P	5823.19	P	3004.85	P	4520.09	P	4373.89	P	1364.03	P	3193.22	P	6199.49	P	2902.8	P	1768.54	P	3134.51	P	3647.45	P	2752.01	P	1749.49	LOC_Os06g40440.1	expressed protein
Os001897_01	A	69.5309	A	79.0666	A	110.232	P	336.172	P	267.647	P	246.719	P	261.298	P	328.172	P	229.753	P	212.298	P	218.751	P	221.893	P	425.145	P	250.276	P	178.537	A	106.278	P	153.855	P	188.239	-	-
Os001900_01	A	72.0967	A	54.5235	A	67.736	P	187.5	P	193.217	P	135.93	P	131.324	A	118.054	P	146.397	A	70.1826	A	86.3157	A	106.921	A	31.5887	A	29.509	A	15.239	A	77.027	A	93.4571	A	86.0775	LOC_Os09g33860.1	protein kinase, putative, expressed
Os001903_01	A	94.7086	A	87.6714	A	103.944	P	286.117	P	250.961	P	403.345	A	89.0749	P	203.899	P	504.498	P	205.127	P	163.1	P	363.304	P	171.919	P	212.916	P	258.837	P	206.285	P	1101.21	P	602.55	LOC_Os01g68290.1	expressed protein
Os001904_01	P	2017.31	P	2463.18	P	2857.01	P	6484.3	P	4898.67	P	3748.5	P	6290.67	P	5568.95	P	5790.76	P	15539.5	P	13125.4	P	12168.3	P	4082.02	P	5159.06	P	5729.08	P	7279.98	P	7413.65	P	7524.04	LOC_Os10g42020.1	RALFL29 - Rapid ALkalinization Factor RALF family protein precursor, expressed
Os001905_01	A	60.3728	A	39.8916	A	41.9231	P	292.431	P	314.575	P	248.293	P	207.158	P	226.204	P	209.815	P	160.547	P	176.672	P	183.81	A	65.5193	A	102.358	P	209.501	A	134.193	P	179.573	A	152.093	LOC_Os01g47650.1	vacuolar protein sorting-associated protein 16, putative, expressed
Os001911_01	P	167.856	A	116.84	A	90.0946	P	178.158	P	231.485	A	88.3482	A	104.015	P	160.908	P	208.145	A	43.596	A	31.5385	A	44.3762	A	0.889604	A	9.0783	A	15.6612	A	64.5101	A	69.8702	A	58.3527	LOC_Os12g05120.1	receptor kinase, putative, expressed
Os001913_01	P	118.198	A	93.4759	A	77.8647	P	230.5	P	262.789	P	142.964	P	174.649	P	206.632	P	201.284	P	148.21	P	132.746	P	147.76	A	105.133	A	120.799	A	108.787	P	205.787	P	203.518	P	259.774	LOC_Os04g46130.1	plastocyanin-like domain containing protein, putative, expressed
Os001919_01	P	183.995	A	115.561	A	98.104	P	215.84	P	209.129	P	139.35	P	197.572	P	268.804	P	328.501	A	61.0947	A	94.4375	P	127.377	A	5.49368	A	36.2069	A	75.7852	P	131.434	A	126.94	A	81.3061	LOC_Os11g02159.2	expressed protein
Os001920_01	P	108.312	P	152.817	P	205.266	P	333.073	P	224.142	P	196.129	P	179.977	P	240.067	P	226.648	P	236.292	P	264.147	P	257.578	P	267.145	P	246.188	P	209.753	P	243.862	P	232.303	P	268.19	LOC_Os02g41580.1	CAMK_CAMK_like.14 - CAMK includes calcium/calmodulin depedent protein kinases, expressed
Os001921_01	P	192.657	P	192.404	P	234.253	P	455.382	P	496.907	P	516.534	P	631.236	P	633.908	P	700.716	P	359.382	P	344.926	P	384.415	P	311.721	P	316.919	P	219.205	P	400.943	P	376.787	P	534.027	LOC_Os01g64270.1	expressed protein
Os001923_01	P	512.995	P	415.902	P	268.036	P	350.69	P	404.697	P	393.142	P	471.373	P	464.86	P	436.979	P	418.538	P	429.404	P	378.235	P	218.248	P	236.858	P	255.761	P	286.547	P	339.874	P	398.608	-	-
Os001924_01	A	78.3268	A	60.0166	A	63.2365	P	238.244	P	252.683	P	182.483	A	115.942	A	140.679	P	239.099	A	57.1189	A	98.9574	A	95.9622	A	-4.36915	A	42.3399	A	57.4058	P	137.814	A	100.531	A	107.4	LOC_Os04g52540.1	retrotransposon protein, putative, unclassified, expressed
Os001925_01	P	121.824	A	99.8483	A	83.0523	P	618.144	P	361.38	P	325.009	P	348.751	P	449.051	P	406.26	A	193.069	P	298.627	P	285.425	A	209.213	P	289.569	P	397.061	P	300.701	P	325.722	P	253.596	LOC_Os06g03860.1	uncharacterized membrane protein, putative, expressed
Os001927_01	P	138.157	A	114.931	A	54.7755	P	226.874	P	265.003	P	131.661	A	105.66	P	153.569	P	231.103	A	52.859	A	52.2077	A	66.9227	A	14.448	A	26.0148	A	34.444	A	76.1652	A	104.2	A	71.0066	LOC_Os04g41640.1	HEV2 - Hevein family protein precursor, expressed
Os001930_01	P	438.201	P	317.373	P	186.362	P	1345.06	P	2379.94	P	7250.62	P	1347.78	P	1441.44	P	761.383	P	1064.77	P	1410.78	P	1523.21	P	786.385	P	1031.19	P	1974.67	P	1168.46	P	1442.44	P	1001.07	LOC_Os06g49640.1	uncharacterized UPF0114 domain containing protein, expressed
Os001931_01	P	1160.25	P	1073.95	P	1031.12	P	842.847	P	687.29	P	523.452	P	626.294	P	785.923	P	901.196	P	1202.96	P	1173.2	P	1231.11	P	1187.49	P	910.485	P	717.076	P	743.939	P	856.421	P	915.72	LOC_Os07g17560.1	expressed protein
Os001934_01	A	68.4541	A	67.3606	A	63.6161	P	207.901	P	218.092	A	118.561	P	1340.44	P	463.474	A	125.735	A	47.9237	A	43.4381	A	50.3967	A	22.7745	A	33.8361	A	18.653	P	283.782	P	190.558	A	78.858	-	-
Os001935_01	A	63.5164	A	45.1308	A	67.4235	P	279.278	P	311.75	P	421.71	P	306.699	P	345.534	P	165.951	P	180.474	P	248.934	P	331.678	A	80.4576	P	168.926	P	242.428	P	213.457	P	206.215	A	171.596	LOC_Os03g15570.1	STE_MEKK_ste11_MAP3K.12 - STE kinases include homologs to sterile 7, sterile 11 and sterile 20 from yeast, expressed
Os001936_01	A	77.2252	A	148.229	A	79.5745	P	272.558	P	377.579	P	520.655	P	240.866	P	242.329	P	260.547	P	168.266	P	239.669	P	335.243	P	129.708	A	117.522	A	122.701	P	230.61	P	198.659	P	188.966	LOC_Os06g30390.1	oxidoreductase/ transition metal ion binding protein, putative, expressed
Os001937_01	A	63.5527	A	63.89	A	81.4704	P	219.203	P	180.27	A	128.402	P	129.802	P	182.44	P	199.657	A	64.9649	A	94.9869	A	94.0919	A	51.2401	A	58.8788	A	72.6109	A	72.2179	A	93.159	A	120.285	LOC_Os09g37949.1	serine/threonine-protein kinase SRPK1, putative, expressed
Os001938_01	A	73.2086	A	93.9534	A	80.2611	P	165.696	P	188.725	A	201.994	P	182.419	P	282.805	P	286.243	P	163.042	P	190.202	P	179.533	A	84.408	A	82.3818	A	79.9269	P	203.11	P	190.562	P	241.244	LOC_Os07g37420.1	versicolorin reductase, putative, expressed
Os001939_01	P	744.975	P	668.182	P	652.117	P	883.023	P	720.986	P	1005.65	P	908.152	P	907.802	P	861.56	P	742.734	P	763.634	P	1162.89	P	687.019	P	677.502	P	699.871	P	867.948	P	885.483	P	812.544	LOC_Os04g50970.1	seed specific protein Bn15D1B, putative, expressed
Os001940_01	A	128.152	A	90.3256	A	82.7532	P	194.356	A	174.642	P	129.3	A	61.2711	A	114.815	A	120.528	A	40.9028	A	30.2741	A	42.9511	A	26.6578	A	29.1218	A	19.596	A	70.1152	A	130.599	P	297.256	LOC_Os03g57950.2	type I inositol-1,4,5-trisphosphate 5-phosphatase, putative, expressed
Os001941_01	A	64.5099	A	54.6626	A	64.8636	P	163.681	P	196.165	P	126.889	A	99.5536	P	189.366	P	147.803	A	53.5808	A	70.3404	A	86.2317	A	38.3157	A	39.0576	A	23.1626	A	86.9637	P	128.494	A	89.8173	LOC_Os07g47670.2	hypoxia-responsive family protein, putative, expressed
Os001942_01	P	3375.95	P	2309.84	P	691.876	P	1847.69	P	2530.29	P	2972.88	P	2403.39	P	2625.23	P	3013.27	P	920.324	P	1545.85	P	1782.55	P	1789.65	P	1342.56	P	1658.92	P	1561.58	P	1402.24	P	842.065	-	-
Os001949_01	A	57.2548	A	32.3779	A	59.0341	P	422.559	P	384.765	P	430.863	P	402.392	P	471.465	P	289.557	P	220.09	P	235.54	P	248.904	A	104.038	A	106.37	P	224.971	P	230.165	P	279.279	P	212.97	LOC_Os01g11900.1	hhH-GPD superfamily base excision DNA repair protein, expressed
Os001957_01	P	267.886	P	270.04	P	256.396	P	795.044	P	1436.91	P	1903.4	P	696.614	P	479.156	P	856.519	P	728.581	P	734.173	P	798.616	P	478.025	P	360.327	P	384.499	P	312.603	P	396.046	P	609.801	LOC_Os07g38230.1	expressed protein
Os001958_01	P	1349.62	P	3305.56	P	3688.84	P	7872.17	P	9890.95	P	6419.29	P	2438.39	P	2805.89	P	4623.41	P	2601.51	P	3025.33	P	3210.58	P	3126.33	P	2977.04	P	2766.16	P	2036.47	P	854.77	P	2433.06	LOC_Os02g37060.1	photosystem II 5 kDa protein, chloroplast precursor, putative, expressed
Os001961_01	P	793.815	P	795.415	P	873.345	P	793.707	P	723.342	P	775.977	P	747.282	P	720.269	P	776.424	P	721.134	P	767.816	P	803.123	P	866.617	P	846.684	P	769.828	P	527.892	P	630.264	P	761.617	LOC_Os01g72200.1	expressed protein
Os001963_01	P	44007.9	P	47830.9	P	49165.8	P	55220.5	P	58183.1	P	58821.7	P	60401.2	P	60397.3	P	60214.3	P	63633	P	60950.8	P	55827.8	P	57198.6	P	55916.5	P	52723	P	61208.3	P	62017.7	P	64026.3	LOC_Os03g46070.1	thaumatin, putative, expressed
Os001966_01	A	101.677	A	61.0832	A	50.0829	P	297.627	P	329.107	P	208.169	P	212.64	P	174.166	P	263.177	P	166.853	P	183.159	P	165.101	P	142.223	A	82.6853	A	54.7643	P	182.047	P	175.679	P	193.064	LOC_Os05g38040.1	expressed protein
Os001968_01	A	82.9472	A	110.884	A	112.733	P	225.938	P	205.642	P	172.232	P	155.505	P	140.518	P	171.557	P	126.216	P	156.288	P	159.405	P	147.083	P	160.97	A	114.885	P	282.876	P	242.031	P	215.148	LOC_Os10g27330.1	glycerol-3-phosphate acyltransferase, putative, expressed
Os001970_01	P	231.617	P	238.332	A	101.538	P	314.708	P	289.547	P	258.945	P	270.38	P	262.001	P	294.698	A	112.457	P	181.645	P	186.876	A	75.3616	A	120.195	A	170.449	P	195.397	P	193.592	P	179.672	-	-
Os001972_01	P	150.49	A	111.761	A	85.4956	P	193.316	P	210.706	P	154.532	A	436.886	P	237.382	P	274.269	A	94.5293	A	97.1527	A	118.545	A	46.1805	A	49.4923	A	77.5327	A	95.6783	P	123.946	A	83.0194	LOC_Os05g34230.1	disease resistance protein RGA3, putative, expressed
Os001973_01	P	2716.42	P	2099.1	P	1038.64	P	555.8	P	500.216	P	582.834	P	981.841	P	1151.81	P	1221.11	P	346.216	P	368.755	P	347.669	P	185.51	P	232.293	P	263.683	P	269.168	P	303.321	P	347.751	LOC_Os04g56540.1	expressed protein
Os001975_01	P	513.76	P	548.233	P	647.153	P	969.972	P	916.496	P	758.262	P	621.125	P	636.568	P	801.36	P	908.325	P	865.405	P	786.479	P	948.447	P	875.438	P	750.075	P	620.67	P	727.878	P	917.313	LOC_Os09g23280.1	pyrrolidone-carboxylate peptidase, putative, expressed
Os001976_01	P	6913.08	P	5258.34	P	1973.16	P	2609.4	P	2484.89	P	3720.53	P	3250.86	P	2753.91	P	1215.25	P	918.356	P	1104.26	P	899.604	P	296.593	P	535.517	P	659.908	P	1549.07	P	1303.16	P	1668.18	LOC_Os02g47320.1	vacuolar ATPase G subunit, putative, expressed
Os001977_01	A	106.306	P	135.508	A	119.19	P	356.241	P	460.584	P	341.899	P	453.119	P	752.955	P	673.727	P	199.138	A	185.546	A	161.33	P	198.937	P	188.444	P	196.121	P	245.895	P	270.403	P	202.164	LOC_Os12g05430.1	ribosomal protein L24, putative, expressed
Os001979_01	P	549.77	P	400.114	P	148.42	P	233.651	P	227.665	P	126.017	A	185.764	P	291.263	P	337.371	A	87.2181	A	89.0125	A	89.5954	A	41.5266	A	42.8877	A	34.5016	A	149.823	P	157.751	P	137.398	LOC_Os05g15240.1	conserved hypothetical protein
Os001980_01	A	58.8208	A	47.2632	A	84.2813	P	253.165	P	248.999	P	228.446	P	646.602	P	536.667	P	251.64	P	152.34	P	176.825	P	229.29	A	169.423	A	130.877	A	79.9927	P	141.304	P	203.87	P	262.18	LOC_Os04g56510.1	ABC1 family domain containing protein, putative, expressed
Os001981_01	A	66.134	A	50.6233	A	58.481	P	248.801	P	233.306	P	209.383	P	265.92	P	614.265	P	712.455	A	77.3703	A	109.747	P	169.491	A	37.5811	A	36.7491	A	17.3418	A	93.9986	A	89.6402	A	102.581	LOC_Os02g45920.1	expressed protein
Os001984_01	A	70.2238	A	67.6893	A	53.7692	P	338.783	P	505.398	P	452.44	P	578.439	P	344.778	P	292.778	P	237.132	P	254.676	P	227.143	P	289.225	P	213.066	A	111.7	P	140.693	P	166.809	P	176.207	LOC_Os02g33610.1	metallo-beta-lactamase, putative, expressed
Os001987_01	P	255.965	P	286.454	P	292.625	P	299.922	P	301.296	P	239.745	P	295.259	P	289.367	P	309.918	P	155.005	P	171.264	P	150.823	P	153.206	P	151.767	A	116.773	P	190.508	P	199.266	P	230.466	-	-
Os001988_01	P	185.457	A	143.261	A	125.318	P	465.87	P	422.362	P	375.485	P	321.439	P	323.618	P	496.308	A	172.754	P	202.623	P	173.663	P	212.433	P	351.246	P	643.808	P	260.519	P	212.249	P	182.488	LOC_Os02g29210.4	ankyrin, putative, expressed
Os001990_01	P	3234.29	P	2879.13	P	1526.71	P	1064.56	P	1155.97	P	2105.94	P	2596.95	P	3461.92	P	2557.29	P	693.738	P	1222.3	P	1282.13	P	889.634	P	638.103	P	1574.65	P	601.866	P	527.808	P	655.268	LOC_Os03g01750.2	dual specificity protein phosphatase, putative, expressed
Os001993_01	P	152.274	P	159.568	A	94.2357	P	253.515	P	634.759	P	657.698	P	787.79	P	438.995	P	311.725	P	181.945	P	392.287	P	456.319	A	134.975	A	141.291	P	231.752	P	224.128	P	317.623	P	256.077	LOC_Os12g40920.3	bZIP transcription factor domain containing protein, expressed
Os001996_01	A	58.1528	A	41.8908	A	57.9889	P	180.752	A	176.512	A	112.246	A	74.8543	P	120.433	A	131.247	A	46.5384	A	38.7251	A	47.6908	A	5.48238	A	20.134	A	28.2929	A	86.2322	A	86.3031	A	78.8801	-	-
Os001998_01	A	126.714	A	85.2062	A	62.4627	P	193.962	P	230.48	P	147.57	A	124.65	P	177.108	P	158.034	A	46.1747	A	61.145	A	60.2145	A	22.5947	A	39.9459	A	49.4943	A	80.5638	A	101.345	A	111.322	LOC_Os02g03690.1	beta-amylase, putative, expressed
Os002001_01	A	81.2704	A	76.3392	A	84.531	P	300.022	P	260.301	P	258.49	P	350.086	P	517.769	P	351.492	P	252.263	P	283.4	P	267.454	A	221.816	P	319.216	P	293.837	P	252.797	P	283.194	P	325.039	LOC_Os05g24580.1	MEMO1, putative, expressed
Os002003_01	A	65.1743	A	53.269	A	65.0245	P	176.584	P	213.544	P	127.354	A	53.5057	A	87.0543	A	82.7166	A	56.6969	A	46.2185	A	51.0113	A	4.30115	A	15.6683	A	14.5417	A	88.7453	A	107.735	A	94.2564	-	-
Os002004_01	A	110.974	A	59.4391	A	68.2135	P	541.877	P	466.389	P	568.401	P	476.737	P	523.989	P	301.07	P	284.102	P	404.889	P	625.823	P	223.087	P	357.025	P	510.806	P	272.875	P	285.441	P	288.208	LOC_Os11g11810.1	NBS-LRR disease resistance protein, putative, expressed
Os002006_01	P	1035.62	P	1107.83	P	1158.22	P	892.671	P	899.438	P	912.118	P	617.072	P	624.036	P	801.657	P	2082.04	P	1857.16	P	1532.8	P	2549.99	P	2104.98	P	1452.03	P	1391.68	P	1467.28	P	1867.81	LOC_Os03g29240.1	PDI, putative, expressed
Os002008_01	P	145.429	P	172.922	P	220.882	P	229.485	P	217.066	P	139.239	P	163.357	P	166.784	P	172.559	P	194.292	P	186.145	P	177.891	P	283.8	P	228.595	P	162.681	P	268.846	P	239.471	P	229.405	LOC_Os11g37100.1	expressed protein
Os002009_01	P	404.042	P	350.511	P	243.84	P	247.56	P	256.857	P	214.337	P	301.67	P	290.775	P	297.104	P	126.721	A	104.21	A	131.002	A	34.7181	A	53.7937	A	57.4313	P	151.854	P	162.072	P	116.062	LOC_Os01g60590.1	transposon protein, putative, Pong sub-class
Os002013_01	P	222.945	P	213.124	P	209.305	P	825.578	P	677.854	P	568.891	P	573.879	P	1106.97	P	1043.04	P	350.966	P	365.346	P	507.812	P	527.584	P	348.208	P	417.67	P	415.94	P	453.759	P	698.447	LOC_Os04g45000.2	short-chain dehydrogenase/reductase, putative, expressed
Os002016_01	A	83.3895	A	86.9955	A	77.3462	P	391.615	P	335.848	P	306.205	P	444.794	P	507.293	P	251.406	P	237.22	P	264.982	P	326.346	P	225.221	P	189.634	A	123.355	A	134.836	P	164.69	P	202.089	LOC_Os03g54150.2	expressed protein
Os002018_01	A	74.4047	A	81.0666	A	78.9128	P	287.076	P	278.79	P	250.426	A	148.311	P	213.722	P	262.326	A	68.7408	A	120.453	P	136.891	A	45.4306	A	76.1081	A	78.7709	P	149.921	P	155.554	P	180.935	LOC_Os02g58070.1	oxidoreductase, putative, expressed
Os002020_01	P	164.074	A	106.934	A	90.9254	P	367.15	P	536.807	P	488.16	P	614.09	P	412.447	P	299.342	P	306.805	P	324.752	P	224.767	P	192.927	P	210.165	P	311.535	P	267.704	P	309.899	P	281.589	LOC_Os02g33710.1	decarboxylase, putative, expressed
Os002021_01	A	60.6204	A	42.481	A	52.7221	P	330.827	P	337.544	P	333.902	P	386.423	P	401.409	P	315.958	P	175.034	P	238.944	P	302.015	A	85.2965	A	133.849	P	245.74	A	123.227	P	184.988	P	177.47	LOC_Os04g30910.1	SAM domain family protein, expressed
Os002022_01	P	1003.25	P	802.382	P	668.987	P	979.935	P	1483.46	P	2220.5	P	1763.02	P	1040.87	P	1099	P	1050.79	P	1302.5	P	1584.08	P	640.11	P	698.386	P	853.731	P	685.512	P	832.953	P	698.55	LOC_Os08g43360.1	RNA recognition motif containing protein, putative, expressed
Os002023_01	A	64.1642	A	41.0307	A	62.4026	P	207.545	P	780.482	P	1394.55	A	95.3919	A	94.1826	A	121.278	A	103.9	A	92.1376	A	59.4116	A	123.611	A	62.1455	A	34.471	A	92.8415	P	120.674	P	150.171	LOC_Os02g13950.1	NHL repeat-containing protein, putative, expressed
Os002024_01	P	2109.02	P	1668.78	P	1597.22	P	502.403	P	454.943	P	391.048	P	816.742	P	1171.63	P	1336.96	P	659.431	P	658.12	P	634.983	P	664.978	P	601.043	P	588.157	P	430.051	P	497.162	P	509.153	LOC_Os01g69110.1	expressed protein
Os002025_01	A	60.3238	A	26.7335	A	33.5371	P	181.074	P	191.39	P	148.785	A	170.689	P	178.333	P	169.585	A	56.7604	A	45.5072	A	55.1477	A	-2.94465	A	11.5035	A	14.6808	A	79.5476	A	91.1167	A	92.7843	LOC_Os06g29350.1	myosin, putative, expressed
Os002027_01	P	150.281	P	143.745	A	66.3947	P	198.132	P	197.779	P	134.661	P	276.137	P	284.453	P	307.411	A	52.3704	A	73.5428	A	74.8715	A	15.6146	A	62.3729	A	94.1282	A	89.8321	A	83.4425	A	87.7802	LOC_Os01g67300.1	expressed protein
Os002028_01	P	151.118	A	55.8634	A	93.7339	P	1051.66	P	636.536	P	1096.81	P	624.237	P	836.623	P	574.534	P	1056.53	P	863.555	P	1345.85	P	856.363	P	712.17	P	702.88	P	697.294	P	1061.89	P	841.484	LOC_Os02g15860.1	expressed protein
Os002036_01	P	3791.09	P	3762.53	P	3407.28	P	1239.17	P	1054.6	P	836.65	P	1692.55	P	1473.94	P	1412.59	P	1918.57	P	1826.13	P	2031.69	P	1833.99	P	1808.59	P	1569.42	P	1452.07	P	1228.22	P	1511.27	LOC_Os11g16960.1	carnitine racemase like protein, putative, expressed
Os002040_01	A	58.3833	A	78.1965	A	63.3115	P	181.8	P	192.097	P	131.343	P	133.143	P	206.065	A	163.771	A	56.4285	A	76.439	A	91.2958	A	35.9616	A	39.7178	A	53.6989	A	102.783	A	118.447	P	119.253	LOC_Os07g07010.1	glucosyltransferase, putative, expressed
Os002050_01	A	60.5679	A	45.7165	A	64.3411	A	171.321	P	169.114	A	85.1508	A	47.4905	A	78.493	P	130.382	A	37.6293	A	38.9756	A	48.4018	A	6.96696	A	90.6887	A	104.699	A	59.4135	A	72.3584	A	60.7535	-	-
Os002052_01	P	179.663	P	182.021	P	183.225	P	391.101	P	396.589	P	343.633	P	200.215	P	252.989	P	278.555	A	109.45	P	116.22	P	157.288	A	72.2219	A	91.9952	A	76.1316	P	166.556	P	150.513	P	151.48	LOC_Os02g55920.1	expressed protein
Os002053_01	P	141.947	A	123.822	A	100.785	P	305.692	P	327.356	P	311.569	P	248.319	P	344.927	P	222.468	P	149.232	P	206.708	P	207.193	A	125.224	A	112.599	P	152.712	P	176.843	P	307.087	P	279.301	LOC_Os03g19940.1	expressed protein
Os002058_01	P	243.589	P	251.597	A	93.2933	P	312.199	P	450.525	P	397.929	P	345.877	P	253.304	P	194.343	A	123.459	P	178.679	P	190.273	A	139.901	A	118.441	A	62.1921	P	274.39	P	147.513	P	183.564	LOC_Os07g38790.1	beta-hexosaminidase precursor, putative, expressed
Os002062_01	A	52.0255	A	54.5464	A	68.262	P	148.349	P	161.389	A	114.533	A	97.4367	A	112.446	P	128.88	A	32.1694	A	47.738	A	58.7396	A	9.87191	A	14.5475	A	19.0205	A	68.2638	A	76.2983	A	52.3441	LOC_Os01g70230.1	transcription factor, putative
Os002063_01	A	111.786	A	100.07	A	95.3458	P	188.252	P	181.372	P	146.911	P	135.19	P	155.192	P	174.503	A	74.4189	A	76.2152	A	90.7128	A	35.9132	A	49.3122	A	53.2181	P	230.964	P	170.26	P	145.645	LOC_Os04g38360.1	wound/stress protein, putative, expressed
Os002071_01	A	74.8112	A	70.1263	A	68.8932	P	333.915	P	315.774	P	261.044	P	293.186	P	261.471	P	392.983	P	147.103	P	188.536	P	203.644	A	114.068	P	153.088	P	126.697	A	126.515	P	181.625	P	206.96	LOC_Os10g20630.1	vacuolar-sorting receptor precursor, putative, expressed
Os002072_01	P	200.69	P	181.168	A	140.027	P	202.598	A	116.069	A	20.3718	A	140.414	P	254.774	P	242.917	A	62.4982	A	97.1973	A	95.7755	A	18.205	A	32.275	A	27.2734	A	84.8929	A	94.5554	P	133.466	LOC_Os03g46510.1	OsFBX103 - F-box domain containing protein, expressed
Os002085_01	P	124.912	P	168.878	P	178.555	P	161.034	P	176.781	P	134.388	P	170.512	P	174.72	P	177.621	P	148.924	P	162.096	P	180.646	P	133.028	P	154.39	P	143.643	P	150.947	P	143.231	P	172.154	LOC_Os12g38330.1	RALFL44 - Rapid ALkalinization Factor RALF family protein precursor, expressed
Os002088_01	A	49.2004	A	41.4088	A	47.4187	P	173.763	P	202.492	A	109.117	P	112.636	A	113.081	P	132.391	A	109.426	P	143.121	P	159.289	A	15.4987	A	40.3727	A	58.2963	P	418.815	P	278.533	P	261.263	-	-
Os002092_01	P	199.65	P	198.456	P	163.665	P	1842.73	P	1409.76	P	1604.3	P	1333.14	P	1423.51	P	1267.48	P	1135.65	P	1604.4	P	1717.67	P	1006.82	P	1077.73	P	1323.25	P	1361.02	P	1144.67	P	1071.53	LOC_Os02g04510.1	UOS1, putative, expressed
Os002094_01	A	43.116	A	44.3268	A	73.3748	P	146.125	A	128.812	P	147.389	A	64.7383	A	71.9727	A	101.865	A	68.3225	A	57.948	A	81.5641	A	62.7999	A	60.1978	A	55.5352	P	120.036	A	99.3434	A	113.045	LOC_Os12g36840.1	pathogenesis-related Bet v I family protein, putative, expressed
Os002098_01	A	81.0492	A	52.4603	A	77.5214	P	203.546	P	178.619	P	137.743	A	107.822	P	178.236	P	164.986	A	49.0477	A	47.0056	A	59.0007	A	47.6074	A	54.4459	A	33.9344	A	76.847	A	96.4833	A	89.2199	LOC_Os02g54860.2	ankyrin repeat-rich protein, putative, expressed
Os002104_02	P	698.041	P	740.948	P	901.517	P	759.186	P	836.462	P	519.737	P	466.111	P	473.319	P	644.591	P	423.316	P	442.535	P	464.758	P	962.825	P	801.78	P	757.681	P	502.08	P	357.827	P	635.109	-	-
Os002113_01	P	11884.4	P	9994.73	P	5309.69	P	1305.58	P	1266.74	P	1092.76	P	2709.65	P	3369.39	P	4178.68	P	2329.01	P	1985.21	P	2190.79	P	2328.02	P	1780.82	P	1290.51	P	995.427	P	1574.35	P	2556.09	LOC_Os12g06780.1	expressed protein
Os002116_01	P	231.893	P	218.734	P	213.639	P	828.001	P	625.452	P	763.989	P	346.636	P	465.775	P	487.954	P	218.202	P	297.546	P	428.158	P	216.595	P	297.64	P	295.519	P	356.468	P	249.922	P	319.312	LOC_Os07g30960.1	monooxygenase, putative, expressed
Os002132_01	A	61.7233	A	58.4933	A	84.7877	P	184.659	P	219.483	P	136.489	P	134.842	P	183.736	A	146.746	A	61.4485	A	89.7011	A	101.047	A	61.2946	A	83.8984	A	84.1502	P	380.176	P	248.489	A	192.325	LOC_Os04g33810.1	RNA recognition motif containing protein, putative, expressed
Os002137_02	A	77.7304	A	51.8044	A	58.7321	P	181.491	P	178.592	P	152.629	P	143.404	P	175.075	P	172.361	A	42.1411	A	57.8483	A	65.2545	A	20.2381	A	27.795	A	22.874	A	81.2319	A	93.5609	A	98.0206	-	-
Os002138_01	P	250.257	P	219.792	P	230.89	P	252.419	P	238.543	P	301.174	P	232.213	P	232.132	P	241.197	P	172.568	P	141.358	P	177.597	A	104.541	P	128.473	A	123.343	P	195.934	P	195.809	P	216.469	-	-
Os002150_01	P	151.984	P	205.965	P	266.51	P	328.798	P	274.64	P	914.41	P	261.992	P	282.241	P	268.133	P	444.15	P	543.121	P	567.773	P	467.757	P	587.429	P	443.466	P	356.118	P	365.963	P	626.398	LOC_Os03g30470.1	CHIT4 - Chitinase family protein precursor, expressed
Os002151_01	P	140.735	A	116.044	A	95.0928	P	268.389	P	273.621	P	274.99	P	374.718	P	287.129	P	252.521	P	207.289	P	236.173	P	256.684	P	262.899	P	235.671	A	121.067	P	148.918	P	196.575	A	182.044	-	-
Os002152_01	A	94.5394	A	103.569	A	117.626	P	250.034	P	357.277	P	381.985	P	370.524	P	213.13	P	230.387	P	300.452	P	280.641	P	299.134	P	232.299	P	200.145	P	189.43	P	253.161	P	310.178	P	323.931	LOC_Os04g48230.2	dehydration response related protein, putative, expressed
Os002160_01	A	65.568	A	63.234	A	81.7637	P	337.291	P	255.154	P	275.945	P	269.481	P	447.105	P	423.216	P	219.434	P	228.227	P	246.571	P	155.488	P	150.936	P	117.461	P	295.871	P	367.542	P	367.162	-	-
Os002163_01	P	1548.8	P	1317.07	P	1357.62	P	1061.3	P	1228.8	P	1420.31	P	2900.73	P	2919.76	P	2495.17	P	1103.58	P	1166.16	P	1337.07	P	1318.27	P	1338.68	P	1184.98	P	1650.13	P	1342.85	P	1468.78	-	-
Os002166_02	P	769.16	P	526.832	A	296.648	P	1402.43	P	857.83	P	903.719	P	717.74	P	717.002	P	773.906	P	448.802	P	475.737	P	823.974	P	587.598	P	487.249	P	344.625	P	672.155	P	453.075	P	557.8	-	-
Os002170_01	A	55.9107	A	45.0302	A	55.8586	P	157.367	P	190.668	P	128.63	P	120.582	P	157.458	P	194.659	A	58.6581	A	88.4629	A	83.5399	A	24.3688	A	29.2241	A	25.5226	A	92.9613	A	97.6272	A	103.072	LOC_Os11g02530.1	OsWRKY40 - Superfamily of TFs having WRKY and zinc finger domains, expressed
Os002177_01	P	532.788	P	559.285	P	665.518	P	520.834	P	535.977	P	430.646	P	698.491	P	586.247	P	609.765	P	590.416	P	730.706	P	746.458	P	766.861	P	719.758	P	664.517	P	556.857	P	505.012	P	513.073	-	-
Os002181_01	P	270.142	P	196.816	P	197.598	P	326.444	P	250.615	A	147.79	P	344.461	P	371.012	P	345.087	P	545.485	P	571.86	P	617.57	P	574.093	P	496.85	P	460.88	P	423.186	P	480.206	P	583.94	LOC_Os08g43230.1	TraB family protein, putative, expressed
Os002182_01	P	446.073	P	342.678	P	236.47	P	175.006	P	244.507	P	149.531	A	281.201	P	460.463	P	435.16	A	65.2444	A	79.4764	A	83.8196	A	10.2893	A	31.4493	A	32.8422	A	95.1658	P	118.468	P	140.782	-	-
Os002188_01	A	99.7396	A	62.2987	A	60.6365	P	172.104	P	178.615	P	134.265	A	109.963	P	133.529	P	162.589	A	48.8048	A	59.3122	A	70.8074	A	25.0864	A	29.0416	A	17.0946	A	86.9822	A	98.1552	A	94.4709	LOC_Os09g09750.1	disease resistance protein RPM1, putative, expressed
Os002189_01	P	181.832	P	161.183	A	154.942	P	229.993	P	197.805	P	146.126	P	143.23	P	232.291	P	201.737	A	87.21	P	119.694	A	84.921	A	143.682	A	126.919	A	73.6568	P	150.833	P	154.412	P	166.709	LOC_Os12g38100.1	membrane associated DUF588 domain containing protein, putative, expressed
Os002197_01	A	56.9862	A	65.8993	A	57.477	P	169.606	P	167.321	P	194.302	A	123.748	P	178.426	P	156.587	A	78.7025	A	103.957	A	106.921	A	58.919	A	66.7026	A	46.8623	A	118.018	P	149.088	A	165.493	LOC_Os01g63250.1	josephin, putative, expressed
Os002198_01	A	44.8316	A	46.6935	A	56.9062	P	163.773	A	224.123	P	162.241	A	93.1912	A	99.0264	P	121.256	A	77.8016	A	76.5352	A	82.1574	A	-6.17544	A	8.20761	A	9.9654	A	95.264	P	226.747	P	239.768	-	-
Os002199_01	P	289.615	P	274.216	P	431.971	P	2897.68	P	2935.2	P	3560.24	P	3493.27	P	3127.11	P	2096.39	P	2217.42	P	2891.2	P	4307.83	P	2112.76	P	2237.11	P	1628.14	P	2832.04	P	1953.22	P	2042.28	LOC_Os07g08200.1	methyltransferase domain containing protein, putative, expressed
Os002204_01	P	91.974	A	83.3301	A	51.9006	P	230.112	P	225.734	P	136.816	A	71.37	P	147.496	P	195.352	A	46.6088	A	51.2881	A	61.8568	A	16.6074	A	28.0776	A	25.5528	A	97.9657	P	111.414	A	122.248	LOC_Os05g35060.1	DUF803 domain containing, putative, expressed
Os002206_01	P	144.851	P	140.382	A	97.5466	P	230.281	P	216.77	P	178.224	P	194.297	P	195.597	P	220.741	P	120.939	A	103.796	A	118.245	A	67.1851	A	79.1399	A	69.6246	P	149.871	P	154.848	P	172.499	LOC_Os03g06170.1	hsp20/alpha crystallin family protein, putative, expressed
Os002221_01	P	2006.58	P	1448.7	P	515.052	P	226.406	P	241.278	P	238.95	P	1223.13	P	1149.26	P	939.789	A	68.2823	A	88.6545	A	76.0314	A	14.3336	A	39.5771	A	34.4693	A	117.189	P	126.757	P	202.915	LOC_Os06g13280.1	O-methyltransferase, putative
Os002223_01	P	1273.9	P	998.807	P	653.577	P	410.017	P	442.853	P	399.876	P	959.691	P	884.44	P	749.966	P	176.645	P	281.672	P	296.452	A	99.0205	P	163.87	P	178.764	P	319.29	P	323.414	P	288.868	-	-
Os002224_01	P	104.965	A	87.4846	A	81.617	P	171.461	P	199.093	P	131.342	A	124.061	P	156.076	P	209.736	A	50.7576	A	57.4059	A	60.1818	A	20.4325	A	24.9508	A	25.0402	A	127.091	P	143.538	A	95.5681	-	-
Os002231_01	A	104.612	A	88.0116	A	78.6863	P	296.59	P	350.46	P	299.894	P	262.268	P	223.947	P	250.482	A	85.2553	A	98.8004	A	94.7931	A	42.7047	A	79.3092	A	97.9274	A	172.851	P	173.27	P	219.171	-	-
Os002233_01	P	892.112	P	650.967	P	206.67	P	233.546	P	239.654	P	147.968	P	215.274	P	277.945	P	401.373	A	89.3681	A	90.181	P	113.87	A	64.9261	A	59.2095	A	45.1516	P	133.043	P	130.987	P	148.517	-	-
Os002238_01	A	50.3147	A	54.1764	A	54.9549	P	172.712	A	148.081	A	102.201	A	55.0441	A	83.7354	A	97.222	A	39.5458	A	36.0879	A	49.3759	A	2.98586	A	15.6872	A	11.919	A	59.0181	A	96.9445	A	86.099	-	-
Os002245_01	A	64.859	A	62.1896	A	55.5202	P	213.998	P	228.82	A	282.53	P	164.851	P	219.569	P	222.921	A	95.8484	A	111.698	A	131.716	A	55.2178	A	68.4576	A	73.947	A	124.234	P	143.309	P	162.56	LOC_Os03g06220.1	DEAD-box ATP-dependent RNA helicase, putative, expressed
Os002266_01	P	18430.9	P	19959.6	P	22251.6	P	17091.2	P	16735.7	P	13686.3	P	23292	P	19866.5	P	19310.3	P	35593.3	P	34724.1	P	33690.4	P	19998	P	19344	P	18873.4	P	38131	P	36036.8	P	34306.8	LOC_Os07g05830.1	zinc-finger protein, putative, expressed
Os002268_01	P	3701.86	P	2343.15	P	1463.27	P	721.756	P	659.943	P	671.469	P	1833.53	P	1725.59	P	2467.11	P	357.432	P	435.121	P	480.809	P	353.174	P	361.989	P	402.449	P	351.451	P	416.711	P	418.585	LOC_Os02g57710.1	signal peptide peptidase-like 2B, putative, expressed
Os002289_01	P	377.29	P	299.544	P	291.516	P	221.459	P	230.333	P	228.445	P	363.648	P	378.107	P	392.764	A	66.8288	P	154.932	P	148.598	A	76.7512	A	71.4707	A	67.5255	A	112.124	P	177.034	P	146.434	LOC_Os01g47680.2	60S ribosomal protein L18a-1, putative, expressed
Os002299_01	A	49.8578	A	50.19	A	57.7118	P	283.531	P	283.56	P	205.129	P	462.003	P	305.96	P	217.507	P	132.259	P	139.261	A	129.868	A	68.6347	A	55.7987	A	54.5574	A	119.508	P	178.128	P	158.121	LOC_Os01g50830.1	expressed protein
Os002300_01	A	53.9649	A	38.5696	A	59.9131	P	212.587	P	200.559	A	100.66	A	119.424	A	111.438	A	128.863	A	41.7093	A	47.5935	A	46.5675	A	-5.87852	A	25.9905	A	41.9803	A	72.896	A	75.1712	A	87.5126	LOC_Os02g09100.1	isoleucyl-tRNA synthetase, cytoplasmic, putative, expressed
Os002304_01	P	754.724	P	542.534	P	231.192	P	1594.53	P	2030.3	P	1668.59	P	2051.97	P	1111.26	P	1603.48	P	1053.33	P	1020.51	P	1122.95	P	843.098	P	774.625	P	683.93	P	756.459	P	737.522	P	850.82	LOC_Os02g13060.1	expressed protein
Os002306_01	P	198.296	P	189.173	P	175.479	P	674.823	P	628.364	P	482.295	P	649.626	P	628.525	P	615.855	P	385.443	P	325.248	P	326.307	P	264.553	P	312.058	P	293.259	P	316.383	P	259.111	P	325.49	-	-
Os002319_01	P	5729.43	P	6771.73	P	8441.53	P	3050.31	P	2756.54	P	2926.41	P	3280.8	P	3700.78	P	4190.38	P	7018.61	P	7555.8	P	7630.83	P	5702.51	P	5848.17	P	6426.7	P	11069.7	P	7941.38	P	8388.63	LOC_Os05g32420.1	expressed protein
Os002322_01	P	193.626	P	116.235	P	135.454	P	226.476	P	242.011	A	163.035	P	123.922	P	145.31	P	155.328	A	59.7154	A	63.9287	A	72.3491	A	30.8808	A	43.95	A	40.7219	A	87.3351	A	74.1709	A	93.8226	LOC_Os05g23420.1	sugar porter, putative, expressed
Os002325_01	P	759.713	P	873.982	P	748.839	P	1862.79	P	2565.1	P	1519.12	P	4817.64	P	3078.69	P	2494.79	P	1908.82	P	1865.62	P	1644.37	P	643.517	P	599.567	P	587.77	P	1151.09	P	952.566	P	2633.24	LOC_Os09g38750.1	expressed protein
Os002326_01	P	1117.78	P	1317.16	P	1931.79	P	3529.67	P	2958.98	P	2488.19	P	2214.37	P	2959.09	P	2436.26	P	2809.06	P	2718.65	P	2656	P	2323.25	P	2316.17	P	2252.35	P	3183.42	P	3332.95	P	3503.32	-	-
Os002330_01	P	93.0127	A	75.0974	A	52.8502	A	160.844	P	212.8	P	128.051	P	174.172	P	156.462	P	141.844	A	67.0026	A	65.6045	A	54.3424	A	4.60837	A	25.5635	A	21.4685	A	85.5068	A	101.914	A	107.761	LOC_Os09g39490.1	histone-like transcription factor and archaeal histone, putative, expressed
Os002341_01	P	2157.05	P	1607.3	P	671.052	P	417.863	P	485.835	P	490.257	P	697.688	P	636.073	P	933.436	P	354.928	P	380.867	P	422.66	P	380.413	P	293.983	P	244.796	P	361.567	P	392.989	P	439.338	LOC_Os11g09010.2	lipase, putative, expressed
Os002347_01	P	249.913	P	202.54	P	238.519	P	328.702	P	349.787	P	270.411	P	236.594	P	275.638	P	322.82	P	427.538	P	492.058	P	402.767	P	260.563	P	281.039	P	365.742	P	625.268	P	634.918	P	498.42	-	-
Os002349_01	A	92.7085	A	76.0038	A	84.7755	P	206.639	P	196.434	P	186.707	A	123.884	P	169.876	A	118.972	A	57.5136	A	57.9826	A	50.1878	A	7.00699	A	10.9598	A	15.8964	A	109.85	P	105.124	A	108.779	-	-
Os002353_01	P	139.716	A	117.643	A	73.1008	P	304.665	P	522.064	P	386.749	P	283.329	P	242.362	P	254.681	A	100.231	A	183.362	A	276.335	A	71.3215	A	110.347	A	111.492	P	1554.65	P	569.621	P	337.468	LOC_Os03g38470.1	GDSL-like lipase/acylhydrolase, putative, expressed
Os002355_01	P	4710.24	P	4303.83	P	3778.21	P	4356.77	P	3733.09	P	2935.82	P	4743.44	P	4637.4	P	4087.58	P	11436	P	10675.8	P	8840.37	P	9981.53	P	7254.91	P	4940.43	P	6560.93	P	7388.4	P	7211.01	LOC_Os03g24690.1	terpene synthase, putative, expressed
Os002356_01	P	116.431	A	136.538	P	160.595	P	274.749	P	281.398	P	240.54	A	102.51	P	142.796	P	176.111	P	114.231	P	118.163	A	77.1754	A	38.3708	A	92.2031	A	116.033	P	160.737	P	181.046	P	172.504	LOC_Os08g39740.1	expressed protein
Os002358_01	P	500.033	P	761.3	P	924.578	P	922.078	P	760.355	P	899.462	P	710.709	P	728.224	P	647.459	P	819.679	P	924.607	P	976.573	P	926.174	P	838.236	P	775.74	P	621.009	P	817.785	P	897.247	LOC_Os05g15850.1	glycosyl hydrolase, putative, expressed
Os002360_01	P	425.011	P	648.07	P	596.366	P	1282.57	P	1773.98	P	932.739	P	1040.7	P	686.912	P	1164.77	P	647.55	P	732.843	P	645.632	P	676.96	P	648.296	P	623.864	P	617.984	P	398.143	P	980.832	LOC_Os01g72260.1	cytochrome P450, putative, expressed
Os002369_01	P	213.993	P	225.552	P	244.359	P	851.45	P	571.215	P	313.905	P	328.502	P	584.455	P	1057.31	P	405.237	P	407.073	P	374.938	P	261.1	P	313.319	P	325.388	P	264.288	P	372.638	P	407.773	-	-
Os002373_01	P	185.062	P	160.554	P	152.819	P	311.003	P	302.146	P	328.887	P	196.002	P	197.307	P	197.14	P	192.491	P	222.384	P	211.954	P	503.363	P	296.118	P	180.663	P	249.245	P	240.029	P	291.052	LOC_Os10g40390.1	scarecrow, putative
Os002374_01	P	1378.03	P	968.665	P	1600.46	P	1744.07	P	1146.16	P	1162.22	P	671.988	P	1325.02	P	1298.99	P	1572.96	P	1581.19	P	1750.46	P	1287.71	P	1769.58	P	2041.42	P	1640.75	P	2440.57	P	2505.32	LOC_Os03g06250.1	retrotransposon protein, putative, unclassified, expressed
Os002383_01	P	327.821	P	361.274	P	371.443	P	383.622	P	381.485	P	345.443	P	330.263	P	284.354	P	244.164	P	510.112	P	484.207	P	450.29	P	328.04	P	298.226	P	340.202	P	427.512	P	585.844	P	522.583	LOC_Os09g15570.1	OsFBX315 - F-box domain containing protein, expressed
Os002387_01	A	79.0887	A	80.031	A	78.8716	P	208.111	P	288.574	P	291.745	P	258.364	P	225.258	P	232.141	A	104.256	P	132.2	A	110.457	A	27.0387	A	51.0548	A	102.633	P	176.834	P	211.233	P	184.603	-	-
Os002390_01	P	3238.64	P	6934.68	P	4774.47	P	6357.81	P	4676.02	P	1022.32	P	2363.26	P	1564.68	P	2360.6	P	2612.9	P	4695.96	P	2058.35	P	4186.05	P	1777.75	P	824.277	P	761.834	P	646.358	P	2163.02	LOC_Os07g05365.1	photosystem II 10 kDa polypeptide, chloroplast precursor, putative, expressed
Os002393_02	P	118.895	A	100.072	A	68.8729	P	680.466	P	644.701	P	171.536	P	300.474	P	377.504	P	594.403	P	172.131	A	140.817	P	130.002	A	54.013	A	94.6679	A	114.675	A	151.511	A	-247.498	A	166.564	LOC_Os07g41830.1	hypothetical protein
Os002395_01	P	178.863	P	210.977	A	129.174	P	490.453	P	859.948	P	592.018	P	905.339	P	387.17	P	548.742	P	349.411	P	340.123	P	344.721	P	314.985	P	236.855	P	301.612	P	298.519	P	335.423	P	342.5	-	-
Os002401_01	A	56.4404	A	47.0996	A	54.8236	P	222.409	P	208.469	P	176.18	P	212.269	P	226.349	P	232.026	A	61.5393	A	92.1648	A	81.7167	A	23.2273	A	36.9998	A	54.7283	A	104.73	A	100.07	A	122.758	LOC_Os01g42120.1	expressed protein
Os002403_01	P	191.657	A	131.043	A	139.469	P	349.874	P	320.073	P	323.444	P	212.302	P	227.724	P	239.661	P	538.131	P	259.955	P	211.26	P	305.945	P	207.113	P	188.306	P	190.536	P	225.399	P	300.148	LOC_Os12g12514.1	NADP-dependent oxidoreductase, putative
Os002408_01	P	169.54	P	202.179	P	184.103	A	68.3201	A	91.198	A	108.637	A	137.603	A	108.257	A	74.9744	A	40.6568	A	39.0097	A	33.3513	A	-6.91179	A	12.0123	A	18.2874	A	256.957	A	191.281	A	92.4189	LOC_Os05g40190.1	thioredoxin, putative, expressed
Os002412_01	P	751.835	P	1136.07	P	1591.31	P	1271.08	P	1108.55	P	1233.3	P	2126.4	P	1687.65	P	1324.79	P	2080.64	P	2215.53	P	2195.44	P	2545.43	P	2411.21	P	2891.03	P	2104.63	P	2215.39	P	2252.27	LOC_Os02g49710.1	RING finger protein, putative, expressed
Os002415_01	P	421.936	P	259.038	P	425.293	P	1561.97	P	1188.8	P	1066.34	P	811.809	P	858.747	P	578.28	P	849.08	P	578.19	P	832.056	P	756.299	P	747.105	P	471.602	P	860.857	P	737.429	P	1040.27	LOC_Os03g43840.1	LSD1 zinc finger domain containing protein, expressed
Os002417_01	A	97.8881	A	93.6695	A	76.892	P	247.855	P	208.768	P	150.858	P	517.871	P	718.971	P	188.532	A	353.349	A	313.61	A	275.733	A	376.579	P	340.751	A	228.03	A	110.693	P	188.3	P	377.206	LOC_Os06g10780.1	AP2 domain containing protein, expressed
Os002419_01	A	124.24	A	99.8267	A	108.817	P	466.563	P	419.464	P	466.1	P	219.971	P	276.79	P	303.741	P	142.969	P	217.953	P	229.51	P	183.931	P	146.58	P	158.6	P	215.412	A	172.36	A	175.189	LOC_Os02g03440.1	LSM domain containing protein, expressed
Os002422_01	P	219.228	P	254.223	P	237.839	P	603.95	P	584.356	P	417.864	P	340.37	P	269.397	P	375.595	P	536.039	P	441.145	P	507.503	P	478.978	P	396.737	P	254.475	P	405.992	P	390.695	P	569.754	LOC_Os04g34250.1	serine/threonine-protein kinase receptor precursor, putative, expressed
Os002424_01	P	315.619	P	362.289	P	410.777	P	521.793	P	474.172	P	399.805	P	451.716	P	439.659	P	449.119	P	822.414	P	713.868	P	733.141	P	758.233	P	636.324	P	475.339	P	675.671	P	696.947	P	866.13	LOC_Os09g36940.1	plastocyanin-like domain containing protein, putative, expressed
Os002427_01	A	74.8945	A	88.8888	A	97.4546	P	194.176	P	184.57	P	198.516	P	113.874	P	183.89	A	107.232	A	92.7004	A	113.693	P	119.242	A	78.6207	A	102.791	P	177.395	P	168.191	P	171.636	P	155.508	LOC_Os01g12520.1	mitochondrial carrier protein, putative, expressed
Os002432_01	P	22713.5	P	25385.6	P	24646.5	P	14672.1	P	14800.5	P	13549.5	P	25688.7	P	22313	P	16724.8	P	32571.4	P	31994	P	28522.6	P	21186.4	P	20885	P	19984.1	P	30305	P	28194.3	P	27509.8	LOC_Os06g13870.1	U-box protein CMPG1, putative, expressed
Os002434_01	P	139.229	A	190.426	P	203.292	P	387.34	P	395.396	P	371.557	P	479.883	P	349.455	P	250.168	P	238.258	P	240.809	P	300.994	P	148.702	A	103.837	A	73.844	A	736.815	P	518.278	P	558.808	-	-
Os002444_01	P	307.68	P	276.139	P	176.579	P	176.881	P	213.291	A	118.281	A	153.426	A	191.653	A	223.783	A	92.7313	A	95.7658	P	118.227	A	105.128	A	108.829	A	120.598	A	95.83	P	111.268	P	139.096	LOC_Os04g55600.1	expressed protein
Os002448_01	A	76.5044	A	88.9782	A	116.304	P	185.111	P	188.462	P	159.92	A	137.011	P	183.497	A	158.531	A	110.3	A	103.234	A	96.1975	A	49.0841	A	51.6101	A	64.1983	P	196.686	P	152.842	P	147.442	LOC_Os02g16730.1	expansin precursor, putative, expressed
Os002451_01	A	92.3967	P	128.318	P	146.078	P	347.242	P	293.946	P	386.698	P	336.168	P	424.904	P	164.314	P	207.903	P	247.201	P	289.287	P	195.733	P	183.54	P	154.736	P	235.489	P	261.215	P	245.229	LOC_Os01g47730.1	ras-related protein, putative, expressed
Os002453_01	A	100.205	P	131.31	A	106.649	P	181.717	P	195.456	P	138.426	A	95.4479	P	151.163	P	182.486	A	89.3521	P	132.457	P	120.973	A	58.5807	A	64.189	A	64.6915	P	113.796	P	138.72	P	140.57	-	-
Os002454_01	P	267.994	P	246.302	P	209.244	P	1135.39	P	1252.22	P	1122.65	P	1356.14	P	738.594	P	789.462	P	860.516	P	1133.13	P	1131.43	P	916.944	P	719.336	P	724.437	P	576.043	P	539.379	P	661.946	LOC_Os02g03720.1	expressed protein
Os002458_01	P	367.195	P	463.45	P	554.187	P	626.914	P	569.248	P	445.866	P	507.228	P	426.417	P	423.46	P	648.696	P	662.808	P	739.001	P	604.093	P	520.625	P	423.984	P	566.435	P	511.682	P	714.418	LOC_Os05g49070.1	dehydrogenase, putative, expressed
Os002472_01	P	830.381	P	620.081	P	323.908	P	1091.96	P	1205.84	P	827.718	P	943.227	P	844.221	P	1156.71	P	1224.14	P	1125.2	P	1085.35	P	1228.98	P	936.367	P	714.44	P	1475.53	P	1002.33	P	1783.87	LOC_Os06g17570.1	embryogenesis transmembrane protein, putative
Os002473_01	P	5663.38	P	5222.61	P	5354.75	P	4290.74	P	3966.26	P	2831.58	P	3909.69	P	3476.25	P	5086.49	P	6225.01	P	6228.68	P	6626.69	P	8087.68	P	7865.64	P	7190.1	P	6278.98	P	6168.72	P	6743.52	-	-
Os002476_01	P	282.383	P	394.177	P	503.415	P	495.974	P	517.73	P	518.094	P	412.701	P	404.693	P	380.928	P	425.034	P	580.807	P	710.978	P	552.6	P	581.271	P	498.423	P	469.547	P	470.953	P	509.083	LOC_Os08g16010.1	acetyltransferase, GNAT family, putative, expressed
Os002481_01	A	67.5186	A	90.9334	A	94.4231	P	181.322	P	162.812	P	122.761	A	85.6912	A	111.239	A	117.428	A	63.9263	A	84.6128	A	92.2228	A	45.9805	A	118.235	A	217.625	A	80.2981	A	108.768	A	120.176	LOC_Os06g08830.1	UDP-glucoronosyl and UDP-glucosyl transferase, putative, expressed
Os002482_01	A	53.5956	A	45.7838	A	45.8992	A	121.603	A	127.319	A	87.3028	P	314.057	P	316.468	P	211.714	A	42.1551	A	40.2669	A	38.9517	A	-25.2336	A	-9.58746	A	-7.32789	P	148.087	P	148.489	P	157.988	-	-
Os002486_01	P	263.241	P	213.181	A	149.843	P	759.148	P	529.367	P	579.632	P	144.904	P	333.699	P	507.135	P	357.188	P	268.6	P	176.815	P	485.878	P	386.348	P	334.224	P	144.489	P	243.328	P	367.468	LOC_Os06g38210.2	expressed protein
Os002493_01	A	57.5863	A	51.0919	A	47.8061	A	140.552	P	198.863	A	128.165	P	184.322	A	175.038	P	149.654	P	117.902	P	115.695	A	99.6753	A	171.427	A	200.74	A	179.416	A	79.8131	P	132.777	A	108.367	LOC_Os02g30714.1	dehydrogenase/reductase, putative, expressed
Os002494_01	P	1796.6	P	2522.8	P	3142.38	P	2076.55	P	1848.33	P	1246.58	P	1403.76	P	1187.45	P	1558.57	P	2887.25	P	2744.61	P	2967.53	P	3592.64	P	2726.86	P	2025.31	P	2584.98	P	2136.45	P	3188	LOC_Os06g44460.1	D-3-phosphoglycerate dehydrogenase, chloroplast precursor, putative, expressed
Os002499_01	P	696.086	P	696.027	P	268.951	P	157.394	P	182.412	A	126.731	A	264.371	P	452.622	P	385.973	A	50.6435	A	57.2559	A	71.5811	A	-1.08471	A	12.6891	A	-0.0946418	A	90.4358	A	105.913	A	95.804	LOC_Os07g35280.1	TKL_IRAK_DUF26-lc.1 - DUF26 kinases have homology to DUF26 containing loci, expressed
Os002500_01	A	65.7961	A	55.5583	A	59.8851	P	170.597	P	208.02	P	143.367	P	237.378	P	179.693	P	152.426	A	75.9615	A	91.4527	A	112.37	A	26.0435	A	35.3653	A	16.1214	A	91.7394	A	96.7711	A	95.6954	-	-
Os002504_01	A	61.7778	A	59.7426	A	63.6941	P	191.765	P	162.865	P	182.517	P	186.589	P	173.528	P	143.451	A	83.3333	A	98.5358	A	90.0694	A	88.0869	A	52.5363	A	41.2678	A	80.099	A	92.5851	A	122.054	LOC_Os06g41390.2	N-terminal asparagine amidohydrolase, putative, expressed
Os002514_01	P	631.404	P	616.075	P	616.28	P	650.735	P	717.578	P	732.834	P	463.601	P	502.392	P	675.376	P	1429.02	P	1492.4	P	1386.71	P	1818.15	P	1240.11	P	935.126	P	1028.27	P	1095.47	P	937.901	-	-
Os002515_01	P	113.053	A	160.67	P	187.989	P	477.968	P	428.374	P	333.8	P	337.682	P	492.727	P	662.703	P	148.192	P	278.187	P	264.916	P	243.796	P	214.021	P	242.363	P	236.832	P	260.064	P	300.606	LOC_Os03g11780.1	expressed protein
Os002516_02	A	86.1654	A	81.6636	A	138.104	P	320.691	P	246.968	P	199.554	A	146.145	P	185.6	P	199.952	A	108.412	A	125.344	P	150.039	P	112.055	A	127.119	A	211.105	P	173.019	P	165.257	P	190.488	-	-
Os002518_01	P	166.606	A	197.781	A	254.56	P	246.046	P	253.401	P	233.739	P	141.511	P	183.906	P	218.334	P	213.626	P	220.511	P	191.452	P	161.114	P	165.088	P	164.452	P	247.76	P	274.775	P	319.6	LOC_Os12g07580.1	dirigent, putative, expressed
Os002521_01	A	115.973	A	95.4919	A	102.815	P	166.768	P	163.168	A	118.329	A	94.1208	P	125.502	P	151.636	A	55.7717	A	47.6251	A	52.1138	A	-8.9467	A	4.29352	A	1.727	A	129.347	A	99.7405	A	85.1407	-	-
Os002522_01	P	2452.68	P	2086.8	P	844.047	P	207.769	P	262.539	P	212.286	P	584.297	P	804.874	P	907.16	A	71.234	A	84.7515	A	84.1479	A	15.8687	A	42.7236	A	30.9677	P	119.787	P	125.685	P	134.16	LOC_Os04g07890.1	AGAP002737-PA, putative, expressed
Os002524_01	A	65.0157	A	62.3419	A	53.1614	P	278.096	P	259.631	P	271.823	P	243.704	P	242.393	P	207.155	A	116.492	P	238.919	P	268.713	A	95.7941	A	95.7526	A	83.1592	P	183.644	P	188.378	P	158.733	LOC_Os06g51250.1	EF hand family protein, putative, expressed
Os002528_01	A	52.607	A	47.7764	A	39.3195	P	171.991	P	155.545	A	200.641	A	80.7959	P	206.792	P	215.127	A	69.1035	A	64.8143	A	75.1551	A	8.36077	A	19.1846	A	26.6949	A	63.2825	A	67.2621	A	65.1076	LOC_Os10g21940.1	expressed protein
Os002530_01	P	2068.07	P	2384.66	P	2449.02	P	3274.42	P	2955.49	P	2770.94	P	5067.11	P	4010.23	P	3015.67	P	5304.48	P	5691.34	P	6480.14	P	2934	P	2927.33	P	3319.66	P	6286.12	P	6959.37	P	4865.01	LOC_Os04g32800.1	basic proline-rich protein, putative, expressed
Os002531_01	P	157.101	A	104.199	A	87.6218	P	432.599	P	573.587	P	492.298	P	328.16	P	304.702	P	391.428	A	165.748	P	355.47	P	454.621	P	423.582	P	248.967	A	104.849	P	234.752	P	188.398	P	196.535	LOC_Os03g08070.1	copper-transporting ATPase PAA1, putative, expressed
Os002532_01	P	111.934	A	106.525	A	138.983	P	313.138	P	237.898	P	209.612	P	149.371	A	267.135	P	165.928	A	114.512	P	151.609	P	170.328	A	96.1448	A	100.812	P	178.005	P	249.596	P	356.12	P	179.319	LOC_Os03g60260.1	ANT1, putative, expressed
Os002534_01	A	40.7194	A	42.5769	A	53.0126	P	249.462	P	258.539	P	139.878	A	71.3945	A	104.896	P	216.904	A	84.2119	A	105.422	A	94.7647	A	24.4	A	70.7434	A	113.328	A	83.7552	P	105.435	A	108.859	LOC_Os07g18240.1	lectin-like receptor kinase, putative, expressed
Os002535_01	P	1639.01	P	2037.47	P	2426.01	P	2176.22	P	1982.29	P	1667.97	P	1743.11	P	1729.33	P	1792.83	P	3321.87	P	3253	P	2992.93	P	2964.18	P	2573.71	P	2405.61	P	2676.36	P	3056.69	P	3494.63	LOC_Os03g44020.1	AGC_PVPK_like_kin82y.9 - ACG kinases include homologs to PKA, PKG and PKC, expressed
Os002537_01	A	91.9902	A	85.4795	A	113.379	P	307.045	P	309.22	P	275.779	P	214.33	P	214.231	P	297.685	A	114.318	A	116.009	P	156.96	A	89.9578	A	85.5787	A	45.0576	P	172.326	P	160.351	P	165.819	LOC_Os05g49920.1	pentatricopeptide, putative, expressed
Os002544_01	A	52.9621	A	77.899	A	86.6282	P	195.297	P	139.599	A	125.865	A	101.015	A	93.5274	P	114.591	A	50.7029	A	66.4018	A	66.0001	A	-0.0837221	A	10.5535	A	8.63458	A	72.7126	A	95.0094	A	71.1408	LOC_Os10g38940.1	fatty acid hydroxylase, putative, expressed
Os002546_01	A	42.5821	A	55.0218	A	52.0736	P	158.649	P	181.449	P	184.569	A	134.661	P	214.628	A	139.272	A	88.4571	A	110.606	A	104.443	A	47.1467	A	40.0002	A	54.8205	A	86.253	P	131.343	A	95.8725	LOC_Os08g40200.1	Ser/Thr protein phosphatase family protein, putative, expressed
Os002550_01	P	138.664	A	119.453	A	57.6226	P	165.698	A	148.93	A	119.124	P	148.532	P	166.921	P	185.016	A	39.8627	A	56.5564	A	64.0001	A	8.53693	A	14.314	A	8.07344	A	88.7858	A	94.7307	P	126.563	-	-
Os002553_01	P	167.978	P	149.401	A	116.046	P	136.28	P	175.207	P	135.589	P	549.053	P	235.694	P	271.712	A	42.6561	A	40.1612	A	54.5569	A	10.5456	A	12.9209	A	-10.666	A	67.9354	A	82.3362	A	58.813	LOC_Os06g45580.1	RING-H2 finger protein, putative, expressed
Os002557_01	A	59.8952	A	47.8775	A	60.1413	P	604.94	P	595.355	P	711.091	P	679.127	P	1120.68	P	722.645	P	322.263	P	455.068	P	412.565	A	177.725	P	312.619	P	408.493	P	258.953	P	386.943	P	314.974	LOC_Os04g35170.1	expressed protein
Os002559_01	P	5065.64	P	5843.46	P	7666.35	P	3024.97	P	2730.2	P	2357.37	P	2794.49	P	2776.19	P	3110.08	P	7764.93	P	7277.12	P	7175.82	P	7664.84	P	6889.5	P	5933.77	P	5384.61	P	6415.86	P	7027.33	LOC_Os08g34010.1	ZF-HD protein dimerisation region containing protein, expressed
Os002563_01	P	11372.9	P	13228	P	17029.7	P	20022.6	P	20220.9	P	17770.4	P	23237.6	P	18732.9	P	16607.9	P	27030.8	P	25157.3	P	24096.9	P	18824.9	P	17571.8	P	16334.3	P	19420	P	20923.5	P	23424.4	LOC_Os01g64790.1	AP2 domain containing protein, expressed
Os002569_01	P	1148.4	P	801.481	P	920.7	P	1556.09	P	1205.76	P	1507.65	P	1255.46	P	1554.99	P	1130.89	P	1490.67	P	2026.35	P	2457.17	P	1518.47	P	1353.53	P	1364.02	P	2198.94	P	2501.12	P	1983.16	LOC_Os05g45440.1	expressed protein
Os002586_01	A	50.3114	A	38.8059	A	45.5154	P	201.875	P	171.884	P	155.292	P	143.804	A	99.7808	P	189.764	A	72.6447	A	85.7956	A	91.6018	A	19.3557	A	36.7152	A	26.5005	A	71.8869	A	86.6833	A	91.9108	LOC_Os02g38060.2	methyltransferase domain containing protein, expressed
Os002589_01	P	287.996	P	290.342	P	494.637	P	307.7	P	231.399	P	225.31	P	219.93	P	240.054	P	199.099	P	267.676	P	288.783	P	325.484	P	305.874	P	282.723	P	243.524	P	338.809	P	329.502	P	329.604	LOC_Os01g45360.1	membrane associated DUF588 domain containing protein, putative, expressed
Os002592_01	P	733.757	P	698.167	P	539.211	P	272.912	P	345.02	P	268.378	P	414.687	P	357.939	P	417.706	A	72.782	P	147.577	A	110.922	A	56.3921	A	61.8278	A	58.8985	A	85.4844	P	147.439	P	133.979	LOC_Os06g22030.1	AT hook motif domain containing protein, expressed
Os002597_01	P	150.248	P	229.483	P	281.193	P	300.279	P	236.184	P	185.569	A	94.7526	P	151.645	P	183.543	P	181.283	P	224.375	P	253.428	P	536.86	P	467.894	A	118.205	P	192.168	P	190.593	P	254.637	LOC_Os03g45250.1	2-aminoethanethiol dioxygenase, putative, expressed
Os002599_01	A	74.9272	A	81.052	A	67.2669	P	195.571	P	261.864	P	240.322	P	178.126	P	184.025	P	164.825	A	105.263	P	142.173	P	133.343	A	58.6779	A	62.1368	A	79.9379	P	162.151	P	127.944	P	141.523	-	-
Os002623_01	A	50.9921	A	35.1364	A	42.8046	P	181.795	P	180.91	P	114.411	A	54.1317	A	101.913	A	163.551	A	58.1392	A	77.6571	A	76.211	A	25.069	A	35.7271	A	46.5591	A	73.5836	A	96.6228	A	95.1275	LOC_Os01g73656.1	expressed protein
Os002627_01	A	126.849	A	131.386	A	105.072	P	309.842	P	543.244	P	951.697	P	164.694	P	200.396	P	269.419	P	146.254	P	184.896	P	209.59	P	139.624	A	117.8	A	90.3282	P	194.623	P	164.628	P	226.581	LOC_Os04g32590.1	transcription factor, putative, expressed
Os002633_01	P	1946.85	P	1925.1	P	1264.43	P	4452.02	P	5314.19	P	5076.86	P	1869.17	P	2046.63	P	1667.71	P	1025.37	P	1124.28	P	765.43	P	1040.08	P	1041.27	P	724.336	P	1490.95	P	1212.75	P	1576.97	LOC_Os03g22960.1	expressed protein
Os002637_01	A	43.0964	A	35.0279	A	28.3716	P	182.218	P	166.273	P	119.462	A	55.0224	A	77.3244	A	105.128	A	40.1003	A	45.2205	A	55.8881	A	7.19428	A	5.41205	A	-8.37521	A	60.2715	A	67.1486	A	72.4111	LOC_Os03g12520.1	STRUBBELIG-RECEPTOR FAMILY 7 precursor, putative, expressed
Os002639_01	P	2651.25	P	3006.18	P	3679.73	P	3226.37	P	2470.96	P	1755.41	P	3475.37	P	3116.23	P	2891.26	P	5785.75	P	6566.79	P	6257.88	P	3178.27	P	3396.9	P	4004.35	P	4134.72	P	4521.41	P	4527.26	-	-
Os002640_01	P	14927.3	P	19322.3	P	26133.3	P	23388.7	P	18903.2	P	14573.6	P	21387.1	P	22677.8	P	22015.8	P	32745.7	P	35530.9	P	37821	P	22317.1	P	22715.9	P	22992.3	P	32686.6	P	32865.5	P	35564.9	LOC_Os02g04120.1	cytidylyltransferase domain containing protein, expressed
Os002642_01	P	7467.33	P	8811.1	P	10708.1	P	9464.06	P	7577.1	P	6062.13	P	9188.2	P	9257.23	P	9618.86	P	19200.4	P	18869.2	P	16816.9	P	12646	P	12293.6	P	12250	P	14802.3	P	15474.6	P	14480.2	-	-
Os002644_01	P	104.868	A	99.8206	A	86.6791	P	243.672	P	224.453	P	161.89	P	175.784	P	212.462	P	233.421	A	75.1214	A	121.679	P	138.838	A	17.7679	A	43.4148	A	47.2292	P	176.995	P	186.46	P	168.268	LOC_Os08g08240.1	transposon protein, putative, unclassified, expressed
Os002648_01	P	5797.98	P	6466.85	P	7231.14	P	12905	P	13143.5	P	8838.76	P	10758.6	P	6672.82	P	8342.71	P	10571.8	P	8543.39	P	9994.1	P	6724.7	P	5949.11	P	4389.23	P	7505.96	P	4419.31	P	9020.91	LOC_Os08g32060.1	spotted leaf 11, putative, expressed
Os002651_01	P	143.385	P	161.878	A	184.231	P	245.289	P	202.908	P	171.014	P	114.377	P	187.813	P	196.945	A	106.543	P	133.775	P	145.974	P	124.318	A	96.8023	A	85.7402	A	134.82	P	141.886	A	133.065	-	-
Os002652_01	P	152.185	A	146.667	P	129.325	P	202.269	P	162.794	P	128.808	P	132.694	P	197.116	P	225.55	A	82.097	A	92.5245	A	89.8009	A	27.8218	A	48.7499	A	58.7365	A	90.6314	P	105.387	A	115.719	LOC_Os07g44310.1	heat shock protein DnaJ, putative, expressed
Os002654_01	P	170.902	P	163.72	A	189.234	P	1421.39	P	1261.16	P	1105.81	P	850.549	P	1380.39	P	1830.08	P	1989.64	P	1801.99	P	1480.3	P	730.044	P	762.044	P	744.165	P	891.248	P	939.494	P	911.3	LOC_Os07g47070.1	hypothetical protein
Os002656_01	P	21578.9	P	22607.1	P	25939.5	P	34237.3	P	37286.6	P	38401.4	P	11426.5	P	21955	P	31814.9	P	45706	P	40004	P	36278.7	P	34636.2	P	34199.1	P	33473	P	35408.4	P	37199.6	P	37291.1	LOC_Os03g28080.1	ring-H2 zinc finger protein, putative, expressed
Os002658_01	P	161.848	P	179.047	P	154.004	P	356.949	P	325.205	P	242.602	P	255.448	P	209.355	P	252.045	P	177.465	P	174.6	P	200.741	A	88.639	A	73.0821	A	42.4991	P	222.301	P	182.28	P	259.242	LOC_Os02g03530.1	PPR repeat domain containing protein, putative, expressed
Os002671_01	P	564.321	P	501.513	P	282.985	P	383.83	P	353.151	P	316.077	P	348.04	P	531.145	P	531.638	P	162.957	P	179.289	P	180.821	A	94.0596	A	93.9205	P	130.177	P	139.322	P	145.341	P	176.135	LOC_Os03g51440.1	LRR receptor-like protein kinase, putative, expressed
Os002673_01	A	62.9379	A	61.5556	A	63.9101	P	417.072	P	507.08	P	692.644	P	418.314	P	501.408	P	476.202	P	290.148	P	441.547	P	560.355	P	206.438	P	188.188	P	304.993	P	160.854	P	195.586	P	221.316	LOC_Os07g07480.1	HNH endonuclease domain-containing protein, putative, expressed
Os002675_01	P	12784.2	P	15639.1	P	15998.8	P	11439.2	P	11185.2	P	8984.95	P	8339.6	P	7398.52	P	11279	P	18717.6	P	16323.2	P	17241.7	P	12781.7	P	12692.9	P	14748	P	13747.2	P	12332	P	13938	LOC_Os06g08340.1	AP2 domain containing protein
Os002676_01	P	435.209	P	635.825	P	774.378	P	935.52	P	824.478	P	635.744	P	730.468	P	693.209	P	692.735	P	1040.01	P	1029.99	P	1033.8	P	826.77	P	692.255	P	650.543	P	717.785	P	737.782	P	751.635	LOC_Os09g26210.1	ZOS9-12 - C2H2 zinc finger protein, expressed
Os002677_01	P	113.455	P	159.05	A	139.899	P	655.619	P	582.177	P	348.339	P	269.242	P	254.85	P	273.349	P	320.183	P	339.148	P	315.804	P	350.608	P	276.527	P	251.721	P	183.715	P	205.783	P	295.987	LOC_Os08g03310.2	zinc finger family protein, putative, expressed
Os002678_01	P	1879.65	P	2263.75	P	2983.1	P	2879.66	P	1822.71	P	1055.14	P	649.95	P	1167.46	P	1607.82	P	4302.39	P	3725.5	P	3718	P	5571.41	P	3895.01	P	1585.13	P	678.329	P	1248.75	P	3326.57	LOC_Os05g03920.1	TKL_IRAK_DUF26-lf.3 - DUF26 kinases have homology to DUF26 containing loci, expressed
Os002679_01	A	47.9648	A	46.9776	A	60.9817	P	272.781	P	258.542	P	285.332	P	184.774	P	241.915	P	314.93	A	119.473	P	148.063	P	185.796	A	69.4934	A	95.9727	P	165.381	P	125.08	A	126.201	A	113.034	LOC_Os05g06750.1	dihydrolipoyl dehydrogenase, mitochondrial precursor, putative, expressed
Os002680_01	P	208.578	P	223.428	P	239.413	P	887.141	P	805.583	P	726.259	P	644.783	P	694.129	P	831.605	P	651.666	P	644.653	P	725.616	P	534.998	P	530.233	P	480.592	P	409.68	P	410.516	P	453.134	-	-
Os002696_01	A	92.1526	A	96.2024	P	97.8768	P	351.244	P	498.471	P	536.079	A	242.53	P	375.147	P	359.085	P	200.291	P	386.19	P	482.114	P	175.983	P	300.495	P	535.14	P	186.961	P	295.527	P	197.909	LOC_Os02g53620.1	nuclear transcription factor Y subunit, putative, expressed
Os002698_01	A	72.6368	A	65.2738	A	78.3353	P	179.446	P	202.656	A	123.685	A	84.0067	P	123.859	A	138.976	A	54.1388	A	70.6907	A	87.2253	A	31.9717	A	38.6089	A	68.8969	A	74.2319	A	97.7584	A	94.7239	LOC_Os12g42200.1	ATCHX, putative, expressed
Os002701_01	P	1285	P	1299.98	P	1186.65	P	2198.25	P	1990.02	P	2237.94	P	2361.39	P	1406.19	P	1534.99	P	2468.88	P	2625.97	P	2048.84	P	1463.26	P	1775.27	P	1677.15	P	944.628	P	1431.96	P	1756.68	LOC_Os11g06020.1	homeobox domain containing protein, expressed
Os002714_01	A	85.8634	A	69.261	A	74.1995	P	214.807	P	187.607	A	104.5	P	140.314	P	153.666	P	186.639	A	58.161	A	55.3251	A	48.3173	A	18.8623	A	25.5171	A	26.8907	A	74.8492	A	75.8003	A	85.2587	-	-
Os002719_01	P	350.161	P	329.248	P	271.923	P	396.633	P	343.087	P	239.648	P	232.32	P	266.025	P	337.456	P	207.785	P	243.578	P	264.541	P	278.128	P	263.016	P	214.237	P	214.198	P	263.664	P	320.459	LOC_Os02g15110.1	zinc finger, C3HC4 type domain containing protein, expressed
Os002722_01	P	651.852	P	548.012	P	275.126	P	201.769	P	218.985	P	193.613	A	196.491	P	375.712	P	324.689	P	160.758	P	157.671	P	148.605	A	76.9977	A	75.3105	A	62.3024	P	166.929	P	145.286	P	161.322	LOC_Os01g19880.1	expressed protein
Os002723_01	A	81.2224	A	92.1664	P	124.842	P	583.972	P	709.012	P	687.298	P	1111.73	P	657.099	P	561.515	P	435.401	P	566.691	P	529.746	P	306.313	P	391.991	P	504.62	P	472.507	P	464.831	P	521.45	-	-
Os002726_01	A	70.8688	A	67.4742	A	61.9225	P	176.919	P	172.687	P	195.075	P	131.566	P	190.662	A	154.703	A	51.8627	A	61.5219	A	57.5571	A	21.6599	A	45.6702	A	39.7375	A	115.673	A	99.2309	A	121.247	LOC_Os01g57440.1	DNA repair metallo-beta-lactamase, putative, expressed
Os002729_01	A	201.023	A	141.712	A	113.543	P	442.742	P	385.491	P	450.085	P	254.804	P	411.321	P	345.182	P	219.965	P	293.495	P	277.213	A	78.383	A	102.972	A	131.536	P	235.48	P	337.543	P	392.409	LOC_Os03g63270.1	regulatory protein, putative, expressed
Os002731_01	P	123.389	A	77.0887	A	69.533	P	164.067	P	170.7	A	120.372	A	107.52	P	168.775	P	223.815	A	38.4222	A	41.0503	A	53.6132	A	20.6012	A	26.0361	A	22.5849	A	80.7059	A	76.6522	A	71.4619	LOC_Os08g05460.1	OsFBL40 - F-box domain and LRR containing protein
Os002732_01	P	2154.02	P	1670.92	P	3892.14	P	2306.51	P	1209.55	P	1138.36	P	1261.26	P	2059.67	P	2048.94	P	1254.96	P	1581.14	P	2087.19	P	1626.23	P	1927.93	P	1632.04	P	3126.89	P	2119.97	P	2232.34	LOC_Os02g46030.1	MYB family transcription factor, putative, expressed
Os002733_01	P	168.537	P	173.259	P	152.34	P	495.294	P	392.276	P	265.783	P	171.459	P	150.411	P	189.184	P	700.779	P	577.938	P	381.153	A	128.833	A	144.007	A	150.097	P	253.384	P	317.167	P	477.011	LOC_Os06g40090.1	VQ domain containing protein, putative, expressed
Os002735_01	P	26348	P	28292.7	P	32085.1	P	35080	P	32454.1	P	31920.2	P	34806.5	P	35110.6	P	35012.6	P	47580.2	P	49345.2	P	53157.7	P	36916.4	P	34715.7	P	31099.1	P	35382.9	P	40302.2	P	44779.6	LOC_Os02g35200.1	VP15, putative, expressed
Os002739_01	P	1152.24	P	1269.49	P	1472.04	P	845.916	P	642.797	P	605.838	P	934.159	P	1150.99	P	932.13	P	1114.96	P	1106.16	P	1113.8	P	1261.39	P	1086.48	P	911.306	P	985.851	P	1007.56	P	961.805	LOC_Os06g39470.1	transferase family protein, putative, expressed
Os002740_01	A	64.4625	A	37.3751	A	60.2078	P	211.094	P	183.711	A	114.996	A	81.4321	P	133.309	A	124.804	A	88.3351	A	85.8229	P	108.527	A	37.504	A	38.3946	A	25.163	A	85.5445	A	40.964	A	133.438	LOC_Os09g26980.1	cytochrome P450, putative, expressed
Os002743_01	P	209.804	P	349.023	P	265.654	P	489.422	P	705.328	P	449.482	P	431.771	P	250.813	P	327.578	P	570.51	P	473.81	P	586.75	P	742.37	P	374.584	P	176.114	P	335.95	P	230.432	P	519.197	LOC_Os03g28080.1	ring-H2 zinc finger protein, putative, expressed
Os002745_01	A	66.7146	A	48.102	A	47.4228	A	108.365	A	113.571	A	72.8899	A	56.1676	A	110.426	A	98.6432	A	42.6826	A	51.9427	A	58.6392	A	12.6922	A	13.2866	A	12.7174	A	66.9544	A	80.8733	A	61.8255	-	-
Os002746_01	A	46.5463	A	44.5154	A	61.3734	P	212.472	P	191.173	P	216.719	P	151.691	P	187.196	P	144.282	P	111.486	P	141.265	P	141.992	A	38.3871	A	78.1696	A	114.847	A	89.1548	A	76.3422	A	121.805	LOC_Os01g70130.2	protein kinase domain containing protein, expressed
Os002748_01	P	174.506	P	161.662	A	126.075	P	193.129	P	192.64	P	136.622	P	169.309	P	179.919	P	223.002	A	101.034	P	141.663	A	88.7559	A	63.343	A	67.19	A	41.3422	P	131.777	P	120.78	P	136.213	LOC_Os05g03800.1	transposon protein, putative, unclassified
Os002752_01	P	19403.8	P	20699.2	P	26628.8	P	23627.7	P	19078.2	P	17236.3	P	26265.4	P	25881.3	P	21697.5	P	36406.8	P	37859.7	P	42300.9	P	25259.5	P	25099.2	P	22422.5	P	45714.5	P	45455.1	P	42867.3	LOC_Os03g54130.1	cysteine protease 1 precursor, putative, expressed
Os002753_01	P	153.96	P	134.527	P	159.969	P	254.514	P	249.552	P	249.315	P	218.964	P	259.539	P	201.29	P	158.242	P	163.713	P	174.272	P	139.981	P	166.098	P	204.649	P	226.221	P	211.285	P	197.935	LOC_Os12g32610.1	expressed protein
Os002754_01	P	266.348	P	269.01	P	182.276	P	229.3	P	185.684	P	154.906	P	145.574	P	167.199	P	175.903	A	83.4605	A	98.2348	A	100.627	A	122.954	A	104.086	A	81.116	P	133.146	P	132.057	P	146.703	LOC_Os02g45420.1	AP2 domain containing protein, expressed
Os002756_01	P	4399.07	P	4247.31	P	6445.63	P	1953.15	P	1550.21	P	1152.11	P	3421	P	3095.1	P	2315.14	P	5566.82	P	5347.01	P	5249.22	P	2950.67	P	3353.71	P	3557.86	P	5758.19	P	5304.15	P	4101.47	-	-
Os002761_01	P	174.61	A	152.637	A	56.9484	P	254.074	P	182.954	A	95.9009	A	80.047	P	208.156	P	254.238	P	140.436	A	101.008	A	87.5803	P	146.668	A	49.3566	A	35.2036	A	98.4637	P	142.598	P	191.075	LOC_Os02g40180.1	receptor-like protein kinase 5 precursor, putative, expressed
Os002768_01	A	95.1841	A	67.4402	A	70.8433	P	194.689	P	160.007	A	115.304	A	87.7752	P	154.106	P	150.463	A	67.1285	A	76.5654	A	73.4767	A	33.9579	A	35.5645	A	33.564	A	109.066	A	92.678	A	89.9619	LOC_Os10g40880.1	flavonol synthase/flavanone 3-hydroxylase, putative, expressed
Os002773_01	A	56.2682	A	82.6592	A	54.416	P	227.427	P	252.254	P	221.571	P	291.607	P	195.765	P	208.098	P	234.241	P	233.978	P	180.51	P	148.929	A	105.47	A	63.8608	P	174.745	P	194.994	P	267.453	-	-
Os002778_01	P	8781.85	P	8682.42	P	9135.07	P	6057.09	P	4845.19	P	3974.7	P	5146.94	P	5276.44	P	7485.4	P	6948.97	P	8496.43	P	9893.54	P	13523.5	P	12141	P	9146.01	P	12228.2	P	11750.1	P	11520.5	LOC_Os07g38430.1	WD domain, G-beta repeat domain containing protein, expressed
Os002785_01	P	6414.79	P	5256.59	P	6682.13	P	12251.8	P	10301.4	P	10773.7	P	11515.7	P	11271.9	P	9228.52	P	15266.8	P	14981.7	P	14646.7	P	13479.6	P	14041.7	P	13560.6	P	11653	P	12255.8	P	13294.8	-	-
Os002787_01	P	214.175	P	183.848	P	170.371	P	307.911	P	307.11	P	251.078	P	270.795	P	331.258	P	362.446	P	214.849	P	279.828	P	362.027	P	147.004	A	113.326	A	80.4206	A	92.8304	A	124.389	P	188.147	-	-
Os002790_01	P	387.351	P	324.82	P	196.375	P	240.338	P	215.777	P	178.602	A	180.013	P	275.354	P	262.032	P	159.6	P	162.655	P	188.727	A	122.873	P	193.273	P	222.438	P	165.348	P	172.119	P	175.653	LOC_Os01g63150.1	retrotransposon protein, putative, Ty3-gypsy subclass, expressed
Os002791_01	A	78.3011	A	69.5621	A	51.66	P	165.335	P	170.609	A	104.664	A	83.8749	P	126.671	A	124.881	A	56.0452	A	70.5152	A	79.7629	A	30.8997	A	36.8274	A	30.5462	A	73.9519	A	86.6956	A	72.5951	LOC_Os05g45880.1	phosphotransferase, putative, expressed
Os002792_01	A	50.4555	A	41.4957	A	55.3015	P	222.907	A	165.76	P	149.911	A	84.9047	P	149.175	A	144.775	A	52.3791	A	53.8928	A	71.4193	A	22.0058	A	21.9222	A	37.2295	A	68.8368	A	80.549	A	68.6601	LOC_Os06g10210.2	expressed protein
Os002793_01	P	440.293	P	405.65	P	362.986	P	667.337	P	711.734	P	669.596	P	349.072	P	485.731	P	370.66	P	444.934	P	439.682	P	305.504	P	405.045	P	330.023	P	329.096	P	326.713	P	368.26	P	445.133	LOC_Os04g34140.1	U-box protein CMPG1, putative, expressed
Os002795_01	A	94.9978	A	65.9413	A	80.2658	P	276.322	P	234.568	P	211.35	P	179.292	P	232.877	P	320.937	A	51.8368	A	86.4382	A	93.6289	A	47.1613	A	56.0107	A	68.72	P	142.431	A	115.776	P	137.762	LOC_Os09g32600.1	OsFBX334 - F-box domain containing protein, expressed
Os002797_01	P	107.846	A	99.3109	A	86.7523	P	224.234	P	218.306	P	231.997	P	168.648	P	164.682	P	199.629	A	114.964	P	172.585	P	193.137	P	109.581	P	157.261	P	130.836	P	185.896	P	199.485	P	174.184	-	-
Os002801_01	P	6193.37	P	3618.91	P	1389.28	P	504.121	P	539.145	P	405.54	P	2588.92	P	1565.52	P	523.877	P	202.916	P	221.416	P	191.808	A	112.766	P	124.095	A	99.6494	P	260.448	P	284.81	P	314.305	-	-
Os002807_01	P	2736.73	P	1749.14	P	1117.61	P	895.15	P	781.974	P	431.323	P	1573.14	P	1152.29	P	870.075	P	496.283	P	470.143	P	351.253	P	602.239	P	406.968	P	277.585	P	462.948	P	560.578	P	588.626	-	-
Os002812_01	A	58.3088	A	59.2533	A	59.1604	P	215.603	P	203.331	P	173.657	A	134.248	P	214.746	P	177.75	A	53.4686	A	85.927	A	100.596	A	18.4663	A	30.2488	A	45.5456	A	99.176	A	106.29	A	88.5268	LOC_Os02g53210.3	expressed protein
Os002818_01	P	194.941	A	169.871	P	195.233	P	431.508	P	383.87	P	336.083	P	306.015	P	333.134	P	307.178	P	279.207	P	297.559	P	349.402	P	394.266	P	312.689	P	236.144	P	310.287	P	307.916	P	326.401	-	-
Os002821_01	A	27.379	A	32.255	A	33.8143	A	135.637	A	205.635	A	125.877	A	60.7448	A	90.1847	P	133.948	A	55.2439	A	58.9638	A	68.6242	A	-17.9864	A	3.07306	A	6.18081	A	72.1577	A	91.4608	A	93.8711	LOC_Os07g19210.1	cytochrome P450, putative, expressed
Os002827_01	P	138.037	A	125.082	A	124.291	P	505.573	P	596.563	P	728.069	P	544.385	P	706.181	P	622.679	P	400.38	P	761.837	P	856.868	P	425.716	P	525.067	P	658.719	P	738.086	P	671.614	P	678.38	-	-
Os002830_01	A	65.0938	A	68.7277	A	49.4	P	183.733	P	212.285	A	106.224	P	131.368	A	119.201	A	117.282	A	57.9751	A	65.9843	A	70.8346	A	-0.341414	A	27.5547	A	37.345	A	83.9247	A	94.8889	A	94.5096	LOC_Os02g18540.1	uncharacterized Cys-rich domain containing protein, putative, expressed
Os002838_01	P	134.787	P	131.903	P	137.775	P	496.213	P	345.534	P	340.565	P	300.75	P	519.327	P	393.935	P	316.439	P	344.634	P	352.135	P	283.143	P	275.843	P	277.341	P	244.795	P	277.443	P	307.735	LOC_Os03g52450.2	GATA transcription factor 25, putative, expressed
Os002847_01	P	7643.76	P	9473.82	P	10149.2	P	7851.82	P	6978.54	P	4664.9	P	7851.86	P	7160.39	P	6593.02	P	11125.7	P	13157.2	P	14009.6	P	9187.08	P	8820.81	P	8313.79	P	15978	P	14850.7	P	12769.9	LOC_Os07g40920.1	APO, putative, expressed
Os002849_01	P	285.396	P	341.834	P	347.749	P	352.092	P	344.705	P	315.535	P	326.182	P	299.49	P	303.088	P	415.667	P	481.52	P	508.613	P	315.99	P	352.036	P	364.235	P	324.689	P	373.178	P	394.247	-	-
Os002850_01	P	451.019	P	594.12	P	765.53	P	506.556	P	457.694	P	383.984	P	403.632	P	478.636	P	440.083	P	1222.69	P	1302.8	P	1404.75	P	1255.63	P	1301	P	1135.84	P	1123.22	P	1124.02	P	1295.61	LOC_Os03g43580.1	IQ calmodulin-binding motif family protein, putative, expressed
Os002855_01	P	375.261	P	429.49	P	521.623	P	354.552	P	293.626	P	211.07	P	291.442	P	320.681	P	305.346	P	478.273	P	498.209	P	556.134	P	603.487	P	485.04	P	373.03	P	421.085	P	482.184	P	444.94	LOC_Os08g31700.1	UNE2, putative, expressed
Os002858_01	P	224.071	P	214.14	P	185.538	P	703.828	P	998.981	P	973.265	P	668.103	P	478.86	P	549.786	P	466.235	P	491.356	P	476.85	P	561.817	P	496.928	P	404.393	P	419.849	P	504.147	P	538.202	LOC_Os01g44430.1	retrotransposon protein, putative, unclassified
Os002864_01	A	100.162	A	75.7105	A	96.1283	P	268.265	P	265.612	P	216.059	P	200.461	P	233.363	A	167.873	P	167.475	P	182.781	P	202.622	A	55.6668	A	63.6477	A	57.9321	P	163.212	P	149.238	P	176.766	-	-
Os002866_01	A	126.246	A	86.4066	A	83.3894	P	808.391	P	443.569	P	847.824	P	602.216	P	1216.74	P	809.501	P	467.317	P	652.784	P	559.943	P	893.569	P	770.169	P	477.981	P	280.316	P	637.596	P	806.925	LOC_Os03g57690.1	aldehyde oxidase, putative
Os002868_01	A	91.5299	A	79.8327	A	59.8769	P	181.922	P	287.181	P	203.654	P	155.345	P	211.189	P	222.124	A	65.1861	A	124.889	A	171.583	A	42.8402	A	56.3096	A	55.0629	A	74.8939	A	102.848	A	85.9164	LOC_Os06g10340.1	autophagy-related protein 12, putative, expressed
Os002873_01	P	125.792	P	172.321	P	144.476	P	316.354	P	356.723	P	414.674	P	413.351	P	421.303	P	316.985	P	293.273	P	416.864	P	481.038	P	357.593	P	369.123	P	307.094	P	359.344	P	344.406	P	279.301	LOC_Os04g42910.1	expressed protein
Os002875_01	A	73.607	A	68.8991	A	68.9714	P	356.472	P	387.254	P	400.038	P	378.93	P	434.234	P	197.977	P	167.795	P	359.549	P	409.073	P	269.024	P	250.238	A	143.783	P	231.611	P	205.572	P	182.798	LOC_Os11g34370.1	phospholipase, patatin family, putative, expressed
Os002881_01	A	79.9207	A	68.8346	A	87.5979	P	221.2	P	200.986	P	151.69	A	84.0631	A	117.644	P	214.528	A	59.2534	A	78.2446	A	73.109	A	18.6142	A	31.6868	A	24.9127	A	85.9367	A	88.598	A	100.457	LOC_Os01g56080.1	expressed protein
Os002889_01	P	180.095	A	162.219	A	84.4844	P	188.316	P	189.042	P	127.304	A	104.229	P	201.826	P	177.01	A	56.5054	A	53.3168	A	65.3252	A	2.43368	A	8.67225	A	5.19196	A	78.1128	A	98.4813	A	98.4468	LOC_Os01g68460.1	DC1, putative, expressed
Os002894_01	P	159.47	P	197.238	P	158.297	P	406.014	P	421.694	P	532.385	P	509.699	P	371.074	P	331.976	P	349.14	P	491.724	P	527.279	P	485.626	P	347.176	A	216.034	P	204.689	P	209.345	P	240.863	LOC_Os02g19150.1	AAA family ATPase, putative, expressed
Os002898_01	P	163.455	P	260.77	A	175.323	P	511.732	P	569.128	P	362.328	P	281.151	P	362.971	P	411.514	P	212.928	P	212.684	P	276.462	A	123.006	A	104.678	A	83.4765	P	192.067	P	172.892	P	255.556	LOC_Os11g11330.1	retrotransposon protein, putative, unclassified, expressed
Os002903_01	A	79.2759	A	56.1587	A	67.4015	P	191.617	P	183.765	P	129.995	P	157.804	A	127.461	A	125.842	A	39.4186	A	47.5428	A	46.7243	A	-1.57782	A	18.7909	A	6.73398	A	72.2358	A	80.2315	A	88.2865	LOC_Os05g06260.1	Spc97 / Spc98 family protein, putative, expressed
Os002907_01	A	76.3606	A	69.5181	A	68.4425	P	277.39	P	277.58	P	275.545	P	320.26	P	288.789	P	257.131	P	170.583	P	169.753	P	215.778	A	82.6152	A	124.751	A	92.6875	P	161.673	P	177.653	P	201.041	LOC_Os02g22070.1	expressed protein
Os002911_01	P	167.323	P	422.315	P	305.742	P	253.355	P	212.45	P	231.573	P	309.211	P	259.428	P	205.095	P	583.902	P	655.47	P	346.068	A	74.1535	A	77.1671	A	81.5113	P	200.456	P	322.909	P	532.804	LOC_Os08g32130.2	heat shock protein DnaJ, putative, expressed
Os002915_01	P	469.932	P	360.812	P	196.017	P	257.267	P	274.766	P	248.939	P	315.492	P	300.388	P	326.57	A	110.208	P	180.649	P	214.256	A	108.222	A	116.216	P	141.985	P	191.536	P	180.288	P	184.682	LOC_Os02g55340.1	WD domain and HEAT domain containing protein, putative, expressed
Os002916_01	P	46303.5	P	42666	P	40098.9	P	52531.6	P	54303.4	P	58133.5	P	57567.8	P	54764	P	51698.4	P	62569.6	P	61659.4	P	55394.1	P	41626.3	P	48443.8	P	53398.1	P	61226.2	P	61634.9	P	61819.1	LOC_Os07g10610.1	expressed protein
Os002918_01	P	367.119	P	479.148	P	385.48	P	1243.08	P	1978.76	P	1982.43	P	2988.68	P	2458.72	P	1277.68	P	796.006	P	1859.41	P	1854.28	P	927.803	P	789.26	P	1006.69	P	1241.62	P	681.06	P	952.518	LOC_Os05g38680.1	plant-specific domain TIGR01589 family protein, expressed
Os002921_01	P	118.201	A	109.272	A	132.685	P	195.218	P	199.595	P	129.288	A	93.8485	A	105.831	P	168.65	A	77.5616	A	94.716	P	113.753	A	96.875	A	100.753	A	96.5033	P	140.994	P	130.12	P	152.131	LOC_Os11g06570.1	transposon protein, putative, CACTA, En/Spm sub-class
Os002928_01	A	68.2608	A	57.5076	A	44.238	P	161.355	P	195.945	P	138.755	A	71.5006	A	111.561	P	166.222	A	77.0805	A	91.171	A	82.1459	A	50.629	A	56.4123	A	47.2443	A	105.003	P	124.315	A	111.753	LOC_Os09g35780.1	BAP2, putative, expressed
Os002930_01	P	254.341	P	235.233	P	190.882	P	218.443	P	199.653	P	162.471	P	241.067	P	275.368	P	290.113	A	93.039	P	117.501	P	123.326	A	57.5016	A	53.8344	A	43.1757	A	90.8264	P	142.953	P	165.952	LOC_Os03g49220.1	adenylosuccinate synthetase, chloroplast precursor, putative, expressed
Os002932_01	A	142.648	P	129.847	A	135.987	P	234.471	P	205.341	P	176.138	A	77.116	A	109.736	A	158.414	A	54.7394	A	62.0573	A	67.0739	A	62.7602	A	55.1815	A	36.0891	A	85.6287	A	105.438	A	115.147	LOC_Os01g60010.1	PPR repeat domain containing protein, putative, expressed
Os002934_01	P	138.755	A	117.106	A	74.9451	P	206.243	P	179.835	P	145.77	P	167.902	P	171.014	P	198.566	A	97.2402	P	136.075	P	142.081	A	51.3033	A	80.3236	A	80.5376	A	123.025	P	158.957	A	170.399	LOC_Os04g43490.1	CK1_CaseinKinase_1.7 - CK1 includes the casein kinase 1 kinases, expressed
Os002935_01	A	81.6606	A	80.8096	A	87.5097	P	243.075	P	300.698	P	341.751	P	393.465	P	270.375	P	352.108	P	199.184	P	274.776	P	269.455	P	263.176	A	148.866	A	92.7878	P	166.535	P	185.139	P	197.573	LOC_Os05g30410.1	PHF5-like protein domain containing protein, expressed
Os002940_01	P	176.597	P	229.752	P	120.035	P	298.186	P	255.198	P	247.03	P	245.202	P	244.271	P	191.736	A	138.829	P	170.898	P	172.133	A	70.731	A	64.0204	A	67.0391	P	153.79	P	178.72	A	358.696	-	-
Os002947_01	P	16826.1	P	22623.2	P	26963.2	P	14815.4	P	14020.6	P	12573.2	P	26676.5	P	20557.8	P	16596.7	P	40279.7	P	40533.2	P	40473.6	P	19683.5	P	19999.6	P	21111.8	P	34385.3	P	36341.2	P	36505	LOC_Os08g31760.1	expressed protein
Os002950_01	P	618.415	P	755.441	P	787.473	P	748.45	P	632.889	P	501.568	P	711.926	P	601.831	P	694.725	P	1024.33	P	1026.89	P	1184.21	P	1914.99	P	1432.62	P	837.151	P	912.844	P	939.13	P	1150.98	LOC_Os06g06530.1	proline-rich cell wall protein-like, putative, expressed
Os002952_01	P	134.241	P	139.013	A	93.801	P	697.688	P	647.638	P	458.156	P	343.961	P	242.653	A	102.91	P	305.419	P	284.009	P	256.522	P	365.047	P	279.264	A	144.771	P	151.39	P	162.352	A	87.7501	LOC_Os10g11590.1	expressed protein
Os002960_02	A	79.1619	A	80.25	A	80.8391	P	256.471	P	296.538	P	290.001	P	247.673	P	238.346	P	165.217	A	92.0025	P	118.812	A	113.131	A	59.2679	A	64.4518	A	65.9676	A	108.176	A	127.545	P	119.888	-	-
Os002968_01	P	1336.66	P	975.482	P	429.677	A	69.0836	A	102.196	A	109.604	A	471.796	A	549.796	A	686.55	A	151.906	A	89.1012	A	73.5636	A	34.6429	A	27.5331	A	35.3306	P	275.595	P	262.098	P	211.367	LOC_Os03g19400.1	expressed protein
Os002971_01	P	6249.29	P	6222.3	P	6690.89	P	6162.3	P	5637.75	P	4971.35	P	9357.43	P	6473.66	P	4996.99	P	14016.4	P	12358	P	11602.3	P	6002.71	P	6870.96	P	7736.11	P	8991.16	P	9569.67	P	9189.38	-	-
Os002973_01	A	105.754	A	127.619	A	67.7131	A	133.502	A	114.773	A	79.468	A	75.4124	P	126.014	P	148.409	A	47.0511	A	72.3109	A	90.5768	A	8.05869	A	17.9049	A	17.9737	A	116.151	A	106.948	A	93.6691	LOC_Os12g40010.2	expressed protein
Os002975_01	P	228.688	P	211.42	P	178.962	P	377.543	P	470.563	P	309.661	P	253.285	P	233.272	P	230.465	P	387.782	P	341.96	A	155.235	A	70.888	A	56.6373	A	31.8281	P	323.969	P	303.908	P	274.746	LOC_Os10g14011.1	expressed protein
Os002976_01	A	110.525	A	71.595	A	55.885	A	44.3088	A	34.2843	A	8.44778	A	70.4602	A	94.0567	A	84.9763	A	81.9497	A	134.071	A	161.382	A	14.8936	A	21.8896	A	10.7612	P	194.59	A	171.261	A	186.681	LOC_Os08g09320.1	YL1 nuclear protein C-terminal domain containing protein, expressed
Os002979_01	A	73.3627	A	97.0456	A	130.683	P	784.605	P	1068.35	P	266.376	P	238.697	A	220.839	P	320.673	A	196.358	A	212.79	A	232.705	A	-3.32298	A	31.1732	A	54.6286	P	391.929	P	289.448	P	551.147	-	-
Os002988_01	A	102.056	A	97.5083	A	115.492	P	512.062	P	404.423	A	187.323	A	99.7088	A	141.489	P	297.822	A	108.723	A	121.804	A	116.233	A	10.2747	A	50.1744	A	74.3971	P	321.586	A	132.925	A	60.7411	LOC_Os01g09430.1	expressed protein
Os002996_01	P	2418.62	P	2811.2	P	3177.24	P	4175.55	P	3636.36	P	3112.51	P	3100.78	P	2999.46	P	3532.23	P	6138.19	P	5863.29	P	5558.29	P	3053.64	P	3038.07	P	3275.42	P	4586.58	P	5193.02	P	5037.65	LOC_Os09g39320.1	CTR1-like protein kinase, putative, expressed
Os002999_01	P	183.507	P	187.143	A	136.731	P	196.531	P	155.816	P	115.164	A	158.465	P	187.147	P	166.709	P	187.038	P	210.645	P	228.54	A	113.929	A	85.1069	A	53.2591	P	324.827	P	264.507	P	221.317	-	-
Os003006_01	P	594.61	P	527.142	P	252.649	P	648.061	P	897.439	P	918.066	P	397.745	P	368.184	P	276.785	A	93.7151	P	115.795	A	101.421	A	47.5414	A	61.6535	A	55.7049	P	154.991	P	164.637	P	172.591	LOC_Os02g42650.1	expansin precursor, putative, expressed
Os003007_01	P	632.174	P	503.983	P	299.221	P	554.303	A	341.327	A	76.0259	P	2649.45	P	2593.48	P	2100.55	P	478.37	P	2253.16	P	3469.61	A	92.7372	A	75.1048	A	24.4047	A	2263.54	A	1148.81	A	231.544	-	-
Os003016_01	P	175.71	A	135.828	A	85.2108	P	286.875	P	221.21	P	242.139	P	239.788	P	249.889	P	258.111	P	129.56	A	120.365	A	118.709	A	30.4461	A	52.3602	A	49.1076	P	191.269	P	198.069	P	182.143	LOC_Os05g43230.1	oryzain alpha chain precursor, putative, expressed
Os003024_01	P	314.376	P	207.443	A	163.171	A	59.6762	A	152.058	A	276.594	A	975.596	A	490.736	A	234.917	A	61.3573	A	214.305	A	261.73	A	23.0608	A	33.8274	A	24.2821	P	1196.07	P	697.789	A	170.085	LOC_Os01g07520.1	proline-rich family protein, putative, expressed
Os003025_01	P	950.963	P	857.12	P	945.405	P	978.165	P	886.883	P	877.105	P	768.398	P	904.854	P	850.695	P	1107.17	P	1306.09	P	1271.65	P	1105.2	P	1121.26	P	1071.34	P	1376.55	P	1343.97	P	1169.93	LOC_Os08g36860.1	cytochrome P450, putative, expressed
Os003026_01	A	55.6707	A	70.0595	A	88.0505	A	128.046	P	140.083	P	127.17	A	69.8692	A	109.511	P	181.376	A	37.7323	A	56.8896	A	59.3189	A	12.4612	A	9.40112	A	10.9728	A	75.517	A	89.4677	A	68.745	LOC_Os09g31270.1	polygalacturonase, putative, expressed
Os003029_01	P	232.249	P	216.634	P	154.25	P	157.708	P	198.008	P	177.5	P	214.944	P	231.169	P	200.449	A	59.8524	A	97.3677	P	134.765	A	33.4039	A	42.6028	A	38.2867	A	88.766	P	114.388	A	76.6458	LOC_Os04g34620.1	expressed protein
Os003030_01	A	119.509	A	111.516	A	101.159	P	154.524	P	197.738	P	144.816	A	107.946	A	108.867	P	146.935	A	55.1412	A	40.7856	A	48.4732	A	42.8463	A	42.4293	A	7.78267	A	72.6959	A	88.4013	A	82.687	-	-
Os003032_01	A	73.8497	A	70.1043	A	74.1401	P	224.556	P	254.908	P	302.684	P	281.796	P	259.216	P	252.842	P	140.745	P	155.811	A	158.721	P	126.316	A	94.049	A	84.0925	P	137.025	P	187.225	P	184.865	-	-
Os003034_01	P	1860.43	P	1287.95	P	595.966	P	154.694	P	170.373	P	178.335	P	784.179	P	743.48	A	576.121	A	91.1263	P	107.781	A	125.091	A	85.6001	A	98.5526	A	107.864	P	152.05	P	133.613	A	111.101	LOC_Os07g45510.1	expressed protein
Os003037_01	A	84.0811	A	97.5231	A	102.214	P	321.044	P	278.264	P	233.862	A	127.2	P	235.308	P	295.003	A	150.252	P	236.588	P	218.604	A	159.379	P	256.295	P	254.967	P	186.256	P	222.149	P	234.239	-	-
Os003039_01	P	236.519	A	162.242	A	63.5415	P	208.734	P	217.156	P	125.413	A	150.268	P	187.422	A	199.634	A	64.7546	A	51.8025	A	67.3242	A	9.90803	A	17.6575	A	11.4374	A	78.1174	A	93.5742	A	80.7887	LOC_Os04g07280.1	AGAP002737-PA, putative, expressed
Os003043_01	A	51.7909	A	62.3487	A	40.711	P	330.582	P	371.369	P	328.785	P	376.354	P	376.084	P	510.175	A	180.32	P	234.068	P	267.419	A	190.804	P	293.754	P	238.21	P	234.334	P	267.328	P	320.231	LOC_Os03g39640.1	CBS domain containing protein, expressed
Os003060_01	P	4200.99	P	3716.41	P	1629.4	P	1855.77	P	2569.47	P	2606.12	P	1292.92	P	1432.41	P	1205.06	P	487.177	P	441.163	P	263.542	P	316.237	P	326.125	P	251.414	P	718.271	P	654.77	P	861.582	LOC_Os07g25500.1	pentatricopeptide, putative, expressed
Os003076_01	P	1736.66	P	2034.02	P	2264.08	P	1527.2	P	1134.02	P	898.571	P	1173.86	P	1328.22	P	1405.57	P	1204.95	P	1355.46	P	1445.65	P	1847.69	P	1683.75	P	1503.78	P	2123.74	P	1921.66	P	1831.3	-	-
Os003084_01	P	219.166	P	217.494	P	248.375	P	300.361	P	215.771	P	260.811	P	210.848	P	202.524	P	163.643	P	266.866	P	243.201	P	257.951	A	210.684	A	130.638	A	78.7828	P	335.597	P	300.931	P	243.982	LOC_Os02g44880.1	expressed protein
Os003089_01	A	49.3789	A	52.4957	A	66.649	P	212.754	P	187.135	P	153.17	A	125.049	P	190.392	P	315.173	A	84.3527	A	82.3184	A	103.165	A	66.5027	A	62.2106	A	68.3193	A	88.3179	A	98.1725	A	103.93	LOC_Os03g19340.1	WD domain, G-beta repeat domain containing protein, expressed
Os003090_01	A	67.7884	A	37.0505	A	54.5516	P	209.677	P	193.881	P	199.839	P	196.382	P	271.93	P	313.27	P	124.393	P	171.511	A	151.751	A	82.3868	A	97.0734	P	132.763	P	190.022	P	181.52	P	151.57	LOC_Os08g07960.2	mitotic checkpoint protein, putative, expressed
Os003091_01	P	602.369	P	878.567	P	665.923	A	109.019	A	84.8724	A	72.985	A	194.603	P	208.386	P	317.135	P	216.262	A	157.541	A	141.048	A	150.885	A	136.09	A	95.5784	P	453.874	P	473.017	A	135.562	LOC_Os01g53720.2	expressed protein
Os003092_01	P	1337.51	P	1653.76	P	1604.79	P	2735.11	P	2782.1	P	1984.58	P	2081.14	P	1329.2	P	1809.67	P	2204.71	P	2017.9	P	2094.52	P	1632.37	P	1565.79	P	1441.03	P	1598.09	P	1492.03	P	2131.85	LOC_Os02g35630.1	AAA family ATPase, putative, expressed
Os003100_01	A	67.92	A	78.7141	A	78.1073	A	137.845	P	1125.27	P	1052.68	A	126.535	A	169.743	A	294.508	A	67.6505	A	74.9235	A	76.0148	A	-2.55195	A	10.0254	A	7.11534	P	959.981	P	1424.61	A	717.015	LOC_Os04g24710.1	ubiquitin carboxyl-terminal hydrolase, family 1, putative, expressed
Os003102_01	P	18523.8	P	21642	P	24667.2	A	73.3727	A	77.6899	A	92.5263	A	5336.69	A	4771.41	A	4597.17	A	83.9157	A	90.257	A	75.6621	A	8142.17	A	7486.78	A	5602.94	P	1141.47	P	816.42	A	179.035	LOC_Os11g41250.1	expressed protein
Os003108_01	P	821.377	P	1088.6	P	1310.13	A	86.1565	A	95.2421	A	145.911	A	298.488	A	346.598	A	306.673	A	53.5244	A	43.9347	A	39.965	A	786.235	A	593.267	A	385.633	A	269.742	P	334.729	P	273.609	-	-
Os003123_01	P	723.812	P	940.69	P	1274.49	A	2871.52	A	3734.35	A	5586.67	A	3066.05	A	2370.93	P	4908.09	A	1903.62	A	2394.05	A	1103.59	P	290.631	P	506.441	P	723.598	A	702.007	A	668.639	A	734.459	LOC_Os03g63740.1	NFD2, putative, expressed
Os003126_01	P	362.542	P	302.744	P	242.568	A	82.3216	A	86.9484	A	101.5	A	150.167	A	154.905	A	124.365	A	102.818	A	121.445	A	77.2409	A	30.2306	A	55.8849	A	77.5636	A	336.808	A	274.672	A	128.746	LOC_Os02g14090.1	berberine and berberine like domain containing protein, expressed
Os003129_01	P	690.539	P	913.35	P	1143.78	P	1623.35	P	1536.91	P	1648.88	P	1446.91	P	1414.28	P	1142.01	P	1920.05	P	2094.25	P	2285.11	P	1594.15	P	1608.27	P	1660.73	P	2180.38	P	2365.14	P	2120.32	LOC_Os08g38220.1	dof zinc finger domain containing protein, putative, expressed
Os003138_01	P	282.027	P	252.901	P	269.6	A	78.7463	A	125.036	P	147.283	A	141.499	A	144.027	A	132.885	A	70.7649	A	93.5978	A	96.104	A	75.3718	A	85.1075	A	111.2	P	208.747	P	204.318	P	174.337	LOC_Os11g26950.1	UDP-glucoronosyl and UDP-glucosyl transferase domain containing protein, expressed
Os003141_01	P	250.729	P	270.406	P	247.363	P	729.81	P	830.565	P	905.8	P	655.755	P	521.882	P	511.287	P	618.937	P	737.406	P	592.257	P	534.977	P	672.01	P	687.042	P	599.607	P	573.089	P	600.009	LOC_Os02g04540.1	retrotransposon protein, putative, unclassified, expressed
Os003150_01	P	271.613	P	278.637	P	327.656	P	486.509	P	444.314	P	399.814	P	418.083	P	402.85	P	388.436	P	478.705	P	512.516	P	509.275	P	306.949	P	302.903	P	295.218	P	482.416	P	535.979	P	474.528	-	-
Os003162_01	A	110.8	A	75.0806	A	65.5235	A	197.809	A	141.567	A	100.769	A	73.9596	A	392.725	A	869.616	A	391.994	A	396.184	A	98.8951	A	-2.58625	A	10.6912	A	8.67002	A	166.271	A	140.568	P	241.785	LOC_Os11g43250.1	Leucine Rich Repeat family protein, expressed
Os003164_01	P	241.999	P	250.061	P	221.773	P	231.096	P	209.789	P	242.394	P	241.17	P	242.61	P	233.015	A	142.168	A	137.202	A	127.153	A	192.516	A	186.866	A	157.249	P	271.264	P	335.14	P	374.637	LOC_Os02g04740.1	molybdenum cofactor synthesis protein 2 large subunit, putative, expressed
Os003174_01	A	45.1821	A	44.4794	A	58.6789	A	90.154	A	109.859	A	171.089	A	67.8668	A	59.5459	A	55.6799	A	49.6862	A	83.9822	A	113.006	A	2.77367	A	14.2058	A	26.3287	A	91.564	A	70.1898	A	88.5328	LOC_Os03g15580.1	AT hook motif family protein, expressed
Os003176_01	A	67.4706	A	63.3374	A	56.076	P	149.448	P	181.878	P	153.702	A	120.748	A	122.546	P	131.646	A	68.2114	A	84.4522	A	97.3957	A	57.9871	A	61.383	A	64.2308	A	155.064	P	148.546	A	124.517	-	-
Os003178_01	A	54.8845	A	62.5038	A	61.5769	P	179.495	A	165.974	A	94.7026	A	79.6315	A	96.326	A	108.464	A	60.7181	A	73.8512	A	71.0796	A	30.6571	A	36.7297	A	23.9537	A	116.041	P	118.312	A	101.305	LOC_Os04g53430.1	MBTB8 - Bric-a-Brac, Tramtrack, Broad Complex BTB domain with Meprin and TRAF Homology MATH domain, expressed
Os003180_01	A	80.7509	A	98.9514	A	76.9082	P	223.472	P	253.231	P	317.186	P	180.067	P	255.386	P	204.361	P	146.985	P	188.622	P	149.711	A	53.3683	P	143.359	A	121.252	P	176.039	P	181.965	P	220.185	LOC_Os02g46690.1	OsFBD8 - F-box and FBD domain containing protein, expressed
Os003181_01	P	1593.1	P	955.425	P	338.019	P	197.581	P	192.932	P	172.948	P	724.209	P	646.833	P	842.22	P	109.106	A	105.391	A	83.722	A	14.9221	A	37.8864	A	39.0432	A	122.724	P	128.302	A	126.957	LOC_Os02g24270.1	retrotransposon protein, putative, unclassified, expressed
Os003185_01	P	366.566	P	266.929	A	119.439	P	246.577	P	243.921	P	189.121	P	318.974	P	313.625	P	346.668	P	277.456	P	288.18	P	285.848	A	37.2729	A	63.8979	A	82.6124	P	384.116	P	309.368	P	307.917	LOC_Os03g08640.1	ORC2 - Putative origin recognition complex subunit 2, expressed
Os003186_01	A	61.7029	A	52.3708	A	51.0745	P	323.092	P	252.05	P	204.425	P	256.104	P	246.236	P	249.648	P	117.548	P	149.378	P	173.688	A	39.4621	A	55.0368	A	51.1837	P	1485.32	P	857.922	P	372.858	LOC_Os05g46780.1	transposon protein, putative, CACTA, En/Spm sub-class, expressed
Os003189_01	A	79.8646	A	74.6652	A	74.5713	P	151.929	P	176.555	A	205.371	P	188.298	A	118.131	A	85.1786	A	76.7112	A	71.89	A	70.0002	A	0.173698	A	19.7729	A	32.5424	P	364.162	P	333.51	A	125.21	LOC_Os01g62860.1	oxidoreductase, aldo/keto reductase family protein, putative, expressed
Os003190_01	A	96.5005	A	98.1917	A	96.5547	A	260.81	P	363.541	P	405.335	A	191.323	A	180.297	A	93.3099	A	257.679	A	140.616	A	58.7858	A	32.0857	A	30.3561	A	27.9928	A	158.968	A	109.325	A	46.1495	-	-
Os003198_01	A	58.9576	A	61.4683	A	58.9767	A	251.486	P	323.305	P	723.392	A	128.592	A	75.6259	A	66.7968	A	119.794	A	169.003	A	121.861	A	16.0373	A	21.5681	A	33.6469	P	208.996	A	120.857	A	65.3769	LOC_Os01g57340.1	rp1, putative, expressed
Os003199_02	P	306.765	P	254.693	P	185.573	P	189.026	P	167.128	A	130.648	A	231.187	A	187.899	A	134.256	A	61.1142	A	74.1684	A	67.9143	A	142.716	A	88.1891	A	29.1993	P	381.671	A	216.805	A	115.009	-	-
Os003200_01	P	506.255	P	423.172	P	311.486	P	252.152	P	220.125	P	252.542	P	280.93	P	341.908	P	334.254	P	326.916	P	285.347	P	245.765	P	324.496	P	318.249	P	222.849	P	786.059	P	569.883	P	413.869	LOC_Os11g07890.1	transposon protein, putative, CACTA, En/Spm sub-class, expressed
Os003205_01	P	986.302	P	765.298	P	678.01	P	517.617	P	493.627	P	488.045	P	751.162	P	623.937	P	501.811	P	449.093	P	580.68	P	589.982	P	1261.84	P	933.367	P	753.494	P	789.857	P	816.094	P	752.602	LOC_Os08g27810.1	OsWAK115 - OsWAK receptor-like protein OsWAK-RLP, expressed
Os003212_01	A	57.6019	A	52.9308	A	62.0935	A	51.3106	A	129.57	A	328.772	A	79.3713	A	65.7644	A	54.1695	A	46.2613	A	57.8931	A	48.991	A	6.05571	A	16.2094	A	16.8178	A	66.8099	A	58.6812	A	50.8318	LOC_Os09g14670.1	phosphoenolpyruvate carboxylase, putative, expressed
Os003215_01	A	123.414	P	154.524	P	190.872	P	155.047	P	220.492	P	282.31	P	242.896	P	218.081	P	207.826	A	73.5442	A	101.197	P	103.105	A	79.378	P	148.377	P	181.747	P	214.55	P	182.294	P	202.05	-	-
Os003219_01	A	112.28	P	199.806	P	190.798	P	322.162	P	425.663	P	433.265	P	248.334	P	281.75	P	201.889	A	129.18	P	164.055	P	131.752	A	59.9826	A	46.3732	A	44.2229	P	210.111	P	192.879	P	198.631	-	-
Os003221_01	A	86.4096	A	84.1968	A	104.299	P	239.175	P	249.655	P	290.318	P	261.122	P	339.448	P	181.158	P	161.068	P	254.24	P	343.984	P	186.349	P	218.787	P	217.922	P	272.689	P	235.487	P	232.304	LOC_Os08g20400.1	adenylate cyclase family protein, expressed
Os003223_01	P	150.75	A	124.858	A	84.1193	A	79.9539	A	167.188	A	214.21	A	87.3202	A	59.6783	A	70.5646	A	44.0615	A	61.221	A	65.5288	A	34.6219	A	35.6447	A	17.5852	A	486.132	P	531.344	P	387.026	LOC_Os05g07010.2	myb-like DNA-binding domain containing protein, expressed
Os003227_01	P	104.818	A	91.5051	A	58.0074	P	175.459	P	174.801	A	129.962	A	85.8576	P	214.456	P	270.004	A	48.2098	A	58.3301	A	54.5797	A	26.1748	A	62.0807	A	58.7516	A	68.309	A	81.0183	A	88.3769	LOC_Os07g34750.1	expressed protein
Os003229_01	A	120.508	A	153.852	P	164.079	P	356.373	P	341.501	P	305.754	P	279.965	P	371.349	P	379.887	P	247.493	P	314.321	P	340.129	P	159.943	P	136.335	A	118.309	P	328.465	P	346.656	P	339.513	LOC_Os04g25960.1	conserved hypothetical protein
Os003237_01	P	3652.3	P	3355.79	P	3687.45	A	47.1542	A	68.6623	A	78.4515	A	799.67	A	636.571	A	564.73	A	101.785	A	99.9077	A	79.8065	A	765.145	A	1294.42	A	1850.2	A	183.296	A	147.397	A	120.32	LOC_Os03g52300.1	SCP-like extracellular protein
Os003242_01	P	317.97	P	256.016	P	165.388	P	170.436	P	191.516	P	203.571	P	277.146	P	250.82	P	309.59	A	108.094	P	137.954	P	133.303	A	21.5394	A	25.9905	A	36.1651	A	131.471	P	149.704	P	187.644	LOC_Os01g09500.1	expressed protein
Os003248_01	P	717.181	P	650.648	A	340.983	A	286.718	P	399.705	P	410.523	P	297.943	P	370.89	A	314.378	A	120.008	A	141.85	A	171.133	A	124.051	A	70.802	A	32.363	A	413.554	A	443.784	A	417.657	LOC_Os04g42040.1	expressed protein
Os003252_01	A	154.19	A	146.929	P	202.897	P	327.284	P	265.106	P	196.728	P	163.204	P	201.635	P	280.384	P	171.174	P	170.326	P	196.65	P	208.36	P	150.487	P	139.604	P	152.347	P	179.109	P	214.569	LOC_Os11g34760.1	MMP37-like protein, mitochondrial precursor, putative, expressed
Os003255_01	P	1031.12	P	706.577	A	370.586	A	3090.8	A	1335.82	A	266.602	A	753.314	A	1023.24	A	1427.63	A	3957.68	A	2705.77	A	2229.04	A	18.4258	A	28.355	A	34.4872	P	15946.2	P	15273.8	A	4586	LOC_Os03g39980.1	expressed protein
Os003257_01	P	198.819	P	234.087	P	220.173	P	342.339	P	358.086	P	359.776	P	248.838	P	209.692	P	202.689	A	147.759	P	173.838	P	251.666	P	122.714	P	123.803	A	108.851	P	181.215	P	166.459	P	163.214	-	-
Os003263_01	P	274.159	P	273.136	P	226.422	P	187.45	P	167.386	P	153.69	P	253.847	P	209.887	P	249.233	P	278.784	P	228.799	P	182.15	A	71.0467	A	127.329	A	158.883	P	253.638	P	243.255	P	253.261	LOC_Os01g40480.1	anthranilate phosphoribosyltransferase, putative, expressed
Os003265_01	A	94.6302	A	76.9051	A	64.4252	A	125.553	P	152.708	A	132.35	P	158.651	A	122.951	A	75.8001	A	73.181	A	90.6369	A	59.6251	A	16.0486	A	33.7315	A	36.3703	A	147.341	A	127.402	A	111.047	LOC_Os05g35380.1	universal stress protein domain containing protein, putative, expressed
Os003269_01	A	80.0928	A	74.265	A	82.1428	A	123.307	A	105.374	A	88.7964	P	108.976	A	115.82	P	137.662	A	63.7217	A	76.719	A	102.088	A	20.8509	A	12.3873	A	7.75069	P	503.444	P	365.756	P	232.62	LOC_Os12g05200.1	DNA binding protein, putative, expressed
Os003271_01	A	78.9583	A	61.2377	A	39.1229	P	149.905	P	158.119	P	140.136	A	101.517	P	134.576	P	142.608	P	280.722	P	259.089	A	175.457	A	12.6931	A	17.4204	A	14.0081	P	350.155	P	273.319	P	192.324	LOC_Os05g50690.1	pentatricopeptide, putative, expressed
Os003275_01	A	122.851	A	94.3549	A	69.6157	P	171.693	A	161.966	A	101.233	A	88.0338	P	153.913	P	242.702	A	72.1021	A	74.7998	A	90.3714	A	14.7093	A	13.4042	A	10.4011	A	82.2116	A	111.833	A	129.418	LOC_Os12g36920.1	calmodulin binding protein, putative, expressed
Os003276_01	P	1117.93	P	1464.23	P	1883.17	P	351.73	A	174.442	A	108.78	A	404.051	A	455.438	A	380.97	A	104.247	A	158.564	A	207.357	A	431.983	A	545.38	A	655.696	A	373.325	A	227.543	A	87.5814	LOC_Os05g48880.1	expressed protein
Os003283_01	P	21006.5	P	21404.6	P	26200.1	P	12884.9	P	12079.3	P	12350.4	P	21906.5	P	18954.7	P	14558.4	P	23887.1	P	23418.8	P	23157.5	P	18966.8	P	17633.4	P	15785.9	P	24701.6	P	21985.7	P	20004.9	-	-
Os003284_01	A	72.053	A	89.7358	A	81.2969	P	4455.95	P	3258.83	A	1058.79	A	2126.33	A	959.167	A	753.95	A	128.768	A	288.863	A	554.863	A	47.4222	A	29.703	A	17.6482	A	447.196	A	289.473	A	300.11	LOC_Os12g43450.1	thaumatin family domain containing protein, expressed
Os003292_01	A	66.8441	A	64.4151	A	70.9077	A	55.0503	A	77.4035	A	58.4292	A	608.365	A	377.227	A	70.797	A	58.4966	A	73.912	A	78.1509	A	6.91301	A	8.79368	A	6.42933	P	527.403	P	569.557	A	362.712	LOC_Os06g10290.1	OsFBX191 - F-box domain containing protein
Os003303_01	P	459.582	P	399.135	A	141.843	A	169.195	A	202.245	P	282.209	A	185.957	A	203.921	A	138.391	A	132.82	A	141.459	A	112.58	A	-24.8729	A	-3.19927	A	-8.97383	A	725.482	P	693.079	P	426.509	-	-
Os003312_01	A	59.9767	A	59.5979	A	68.475	A	52.4718	A	120.041	P	198.789	A	102.776	A	102.088	P	150.746	A	55.7626	A	42.2905	A	32.9766	A	30.0273	A	32.558	A	41.1079	P	259.045	A	171.804	A	107.269	LOC_Os02g33580.1	digalactosyldiacylglycerol synthase, chloroplast precursor, putative, expressed
Os003325_01	A	43.479	A	28.322	A	43.9868	P	283.019	P	246.553	P	223.083	P	268.759	P	278.308	P	247.662	P	122.479	P	161.505	P	175.371	A	45.8898	A	117.823	P	228.116	A	106.893	P	166.19	P	165.089	LOC_Os12g35640.1	OsAPRL6 adenosine 5'-phosphosulfate reductase-like OsAPRL6, expressed
Os003326_01	A	70.618	A	36.5996	A	62.9161	P	174.362	P	160.451	P	175.059	P	189.954	P	199.227	P	192.507	P	221.382	P	248.42	P	248.991	A	58.7813	P	112.602	P	162.737	P	189.005	P	202.12	P	195.245	-	-
Os003332_01	A	104.966	A	76.4977	A	59.1771	P	179.595	A	124.485	A	100.337	P	175.891	P	172.727	P	203.846	A	80.2226	A	107.118	P	145.224	A	12.5074	A	17.1174	A	18.5688	P	210.588	P	189.829	P	126.042	-	-
Os003342_01	A	123.004	P	127.85	A	135.375	P	377.159	P	312.034	P	229.784	P	232.344	P	349.376	P	234.282	P	196.314	P	199.695	P	214.143	P	157.614	P	231.354	A	176.299	P	298.657	P	238.438	P	294.437	-	-
Os003345_01	P	46311.6	P	48796.3	P	51061	P	53158.4	P	54161.7	P	52107.7	P	59767.2	P	53656.2	P	56524.2	P	64474.8	P	61147.4	P	55830.9	P	49939.4	P	53074	P	53288	P	61226.4	P	62038.2	P	64033.7	-	-
Os003349_02	P	147.481	A	119.2	A	86.1065	P	204.046	P	191.714	P	143.089	P	220.524	P	222.944	P	229.712	A	63.146	A	75.0797	A	63.8462	A	36.5744	A	56.9467	A	61.0721	A	117.566	P	114.075	A	106.61	-	-
Os003355_01	A	55.7575	A	64.5371	A	408.183	P	266.467	P	191.715	P	127.098	A	91.0268	P	154.637	P	149.193	A	89.4348	A	110.05	A	103.711	A	22.0553	A	43.9969	A	73.205	P	172.464	P	158.05	A	431.398	LOC_Os02g53360.1	expressed protein
Os003360_02	A	75.1066	A	77.3272	A	88.61	P	219.817	A	177.943	A	100.852	A	111.318	P	165.652	P	191.035	A	71.7053	A	79.8996	P	105.033	A	63.7736	A	58.9604	A	33.0999	A	131.597	P	149.703	P	194.288	-	-
Os003361_01	A	157.973	A	136.126	A	167.477	P	434.865	P	350.109	P	254.586	P	349.696	P	374.48	P	471.958	P	291.202	P	282.63	P	266.675	A	180.762	P	270.152	P	275.893	P	293.729	P	309.15	P	357.492	LOC_Os08g43090.1	bZIP family transcription factor, putative, expressed
Os003364_01	P	289.712	P	228.219	A	87.2018	P	250.157	P	277.094	P	250.255	P	395.558	P	332.219	P	327.845	A	120.684	P	156.857	P	181.937	A	47.6748	A	63.7379	A	86.3355	P	155.02	P	157.511	P	175.229	LOC_Os11g18770.1	PHD-finger family protein, expressed
Os003368_01	P	2169.92	P	1710.38	P	1250.64	P	3711.69	P	4078.84	P	3858.94	P	4462.03	P	2989.37	P	2714.62	P	5149.89	P	3852.81	P	2996.36	P	2281.86	P	2260.23	P	2314.82	P	1928.53	P	2253.31	P	2205.55	LOC_Os07g47080.1	expressed protein
Os003371_01	A	95.0899	A	59.2283	A	53.4492	P	289.166	P	330.651	P	474.086	P	183.832	P	278.408	P	172.043	A	98.7203	P	159.492	A	121.929	A	55.6131	A	76.0556	A	119.862	P	131.754	A	119.066	A	135.099	LOC_Os11g09970.1	OsFBX411 - F-box domain containing protein, expressed
Os003375_01	P	9196.44	P	6622.01	P	3371.53	P	481.7	P	489.044	P	425.45	P	2127.31	P	2609.61	P	3629.32	P	198.63	P	237.339	P	252.001	P	156.194	A	116.298	A	97.567	P	252.404	P	251.89	P	275.511	LOC_Os06g30820.4	expressed protein
Os003377_01	P	112.538	A	87.5603	A	72.6185	P	245.393	P	286.266	P	245.648	P	195.881	P	189.847	P	248.523	A	68.9016	A	90.6652	A	110.261	A	31.208	A	54.3968	A	36.0807	A	88.7954	A	102.882	A	103.588	LOC_Os06g16980.2	DNA topoisomerase I family protein, expressed
Os003386_01	P	2599.17	P	2986.74	P	3948.06	P	2754.33	P	2076.69	P	1923.72	P	1484.44	P	1705.34	P	1751.61	P	4310.14	P	4003.74	P	3837.21	P	4147.67	P	4088.89	P	3397.24	P	3757.05	P	4201.09	P	4405.86	-	-
Os003390_01	P	536.315	P	465.423	P	237.203	P	464.833	P	469.459	P	425.926	P	608.683	P	764.832	P	849.016	P	321.255	P	285.471	P	283.699	P	453.061	P	312.253	P	258.184	P	238.808	P	233.411	P	267.66	LOC_Os05g32390.1	FZL, putative, expressed
Os003399_01	P	20001.7	P	22781.3	P	27288.8	P	35037.2	P	35166.4	P	35312.2	P	22073	P	27078.1	P	34374.8	P	50699.7	P	47894.2	P	45408.2	P	37333.5	P	34952	P	30757.7	P	38213.8	P	40812.8	P	42600.2	LOC_Os04g36650.1	ZOS4-06 - C2H2 zinc finger protein, expressed
Os003401_01	P	167.031	P	153.917	A	148.687	P	425.62	P	368.343	P	339.195	P	217.541	P	302.544	P	369.573	A	156.525	P	222.943	P	271.189	P	284.222	P	233.105	P	184.482	P	233.923	P	239.83	P	232.733	LOC_Os05g05740.1	proline synthetase co-transcribed bacterial homolog protein, putative, expressed
Os003407_01	A	97.5118	A	55.6913	A	73.3401	P	166.297	P	175.61	P	144.176	A	101.207	A	103.545	P	215.129	A	42.9934	A	46.455	A	66.5475	A	-16.0261	A	24.4893	A	47.5798	A	73.3272	A	79.8765	A	65.2273	LOC_Os12g33220.1	F-box/LRR-repeat protein 14, putative
Os003410_02	P	279.974	P	218.471	P	424.112	P	214.833	A	154.454	A	74.278	A	55.1705	A	118.874	P	191.05	A	38.2602	A	33.352	A	33.6641	A	35.7673	A	30.7192	A	22.7367	A	52.3436	A	56.6537	A	60.1216	-	-
Os003412_01	A	55.6929	A	44.6525	A	41.5842	P	225.999	P	196.139	P	144.944	A	114.74	P	170.982	P	194.81	A	133.297	P	132.729	P	138.477	A	78.4162	A	82.5452	A	62.7481	A	141.129	P	156.909	P	182.327	LOC_Os09g18410.1	retrotransposon protein, putative, Ty3-gypsy subclass
Os003415_01	P	15486.5	P	15945.5	P	20119.9	P	26903.5	P	19871.2	P	17124.2	P	20068	P	16926.4	P	18388.6	P	33476.1	P	28687.1	P	27155.7	P	15675.7	P	21951	P	24767.1	P	20828.8	P	21918	P	26389.9	-	-
Os003416_01	P	2408.92	P	2108.18	P	1388.29	P	3327.19	P	3502.07	P	2880.61	P	2448.04	P	2185.86	P	1705.61	P	3327.25	P	3077.36	P	2340.32	P	1775.68	P	1943.05	P	2101.59	P	2660.54	P	2783.1	P	2956.02	LOC_Os08g06620.1	DNA polymerase delta subunit 4 family, putative, expressed
Os003421_01	A	92.0723	A	198.539	A	149.538	P	157.391	P	155.562	P	120.066	A	61.4365	A	80.7594	A	126.246	P	98.9315	A	75.9739	A	86.8366	A	51.3309	A	38.8106	A	31.0284	A	85.2883	A	90.0219	P	112.295	LOC_Os01g48750.1	aspartic proteinase nepenthesin-2 precursor, putative, expressed
Os003424_01	P	173.041	A	138.939	A	162.774	P	306.012	P	240.165	P	259.069	P	458.571	P	376.026	P	366.109	P	135.094	P	237.451	A	224.541	A	156.586	P	170.321	P	183.589	P	151.679	P	312.263	P	484.028	LOC_Os12g29550.1	expressed protein
Os003427_01	A	60.4818	A	95.1049	A	98.9151	P	176.129	P	180.144	P	136.694	A	65.8949	A	91.2865	A	126.268	A	117.434	A	95.8873	A	94.7581	A	39.2093	A	40.53	A	25.4499	A	81.9343	A	96.8372	A	92.8885	LOC_Os03g27590.2	OsSCP18 - Putative Serine Carboxypeptidase homologue, expressed
Os003432_01	P	198.857	P	169.688	P	154.041	P	394.471	P	328.566	P	307.048	P	291.124	P	308.8	P	270.043	P	183.709	P	204.419	P	242.148	A	145.048	A	131.734	A	92.757	P	140.04	P	152.843	P	167.73	-	-
Os003433_01	A	47.5957	A	49.5561	A	59.3488	P	203.856	A	179.651	A	121.021	A	72.6278	P	142.59	A	112.362	A	50.1535	A	35.9369	A	33.7282	A	-0.337308	A	23.8847	A	22.5361	A	66.4251	A	73.1119	A	78.7227	LOC_Os09g07730.1	expressed protein
Os003434_01	A	71.0095	A	38.3144	A	59.9627	P	253.487	P	902.454	P	1747.13	P	136.892	P	193.068	P	217.471	A	139.088	A	100.151	A	106.273	A	104.422	A	45.3867	A	9.12818	A	114.525	P	163.311	P	262.139	LOC_Os03g48170.1	5-AMP-activated protein kinase-related, putative, expressed
Os003437_01	P	187.958	P	231.665	P	276.983	P	338.05	P	320.079	P	231.83	P	157.333	P	214.171	P	241.243	P	329.776	P	334.14	P	343.314	P	269.202	P	232.821	P	256.725	P	338.436	P	359.859	P	384.395	LOC_Os04g57530.1	transcription factor, putative, expressed
Os003440_01	P	181.716	A	102.713	A	100.916	P	212.734	P	209.721	P	264.728	A	243.566	P	206.69	A	137.462	A	32.8365	A	36.8552	A	38.6992	A	77.7378	A	15.4693	A	-3.922	A	65.9999	A	94.9711	A	100.411	LOC_Os01g66680.1	S-domain receptor-like protein kinase, putative, expressed
Os003442_01	P	212.354	P	225.047	A	219.463	P	210.784	P	186.894	P	138.036	A	159.712	P	210.957	P	251.158	A	114.7	A	93.8692	A	84.3543	A	83.1695	A	76.7735	A	50.4038	A	118.02	P	142.671	P	122.538	-	-
Os003443_01	P	115.131	A	106.943	A	140.486	P	188.462	P	174.935	P	140.567	A	99.3722	P	213.161	P	183.737	A	79.2936	A	99.6277	A	128.355	A	49.3271	A	44.1541	A	74.112	A	110.404	P	156.127	A	109.671	LOC_Os04g34000.1	digalactosyldiacylglycerol synthase, chloroplast precursor, putative, expressed
Os003457_01	P	195.256	P	131.993	P	184.291	P	394.355	P	326.915	P	320.077	P	382.679	P	419.141	P	354.496	P	338.703	P	309.69	P	351.35	P	291.449	P	292.537	P	225.374	P	320.67	P	281.565	P	502.234	-	-
Os003460_01	P	648.648	P	507.228	P	448.201	P	620.361	P	472.556	P	350.241	P	430.645	P	469.635	P	492.009	P	548.084	P	451.459	P	377.262	P	299.615	P	312.977	P	277.725	P	401.547	P	387.411	P	471.775	LOC_Os03g45270.1	CS domain containing protein, putative, expressed
Os003461_01	P	383.264	P	393.359	P	340.262	P	526.616	P	461.368	P	396.395	P	340.29	P	370.241	P	430.126	P	506.939	P	550.656	P	540.278	P	453.631	P	437.466	P	440.877	P	423.123	P	443.63	P	459.812	LOC_Os01g56850.1	expressed protein
Os003465_01	P	2237.62	P	2535.66	P	3166.55	P	5388.17	P	4916.37	P	4424.09	P	5415.26	P	4905.93	P	3819.09	P	8423.7	P	7779.81	P	7483.61	P	5441.23	P	5072.84	P	4124.65	P	6690.54	P	6591.68	P	6597.8	LOC_Os12g03870.1	major facilitator superfamily antiporter, putative
Os003466_01	A	67.9972	A	60.5286	A	67.2643	A	160.644	A	142.816	A	115.75	A	60.1332	A	91.0055	P	118.503	A	48.0829	A	41.5405	A	65.2948	A	111.102	A	73.2464	A	3.69279	A	60.1684	A	82.3931	A	71.8063	LOC_Os07g32660.1	monocopper oxidase, putative, expressed
Os003469_01	A	81.9411	A	75.2516	A	80.9755	P	196.655	P	186.319	P	166.344	A	92.977	A	108.783	A	146.877	A	66.1705	A	82.0672	A	79.8166	A	24.1336	A	49.712	A	39.9432	A	82.5733	A	105.191	A	122.796	LOC_Os11g42060.1	Leucine Rich Repeat family protein, expressed
Os003473_01	P	110.11	A	92.9586	A	74.0039	P	181.259	P	181.263	P	167.992	P	181.691	P	185.204	A	176.087	A	69.2331	A	108.677	P	157.515	A	66.4389	A	69.685	A	49.1935	A	68.4625	A	87.9574	A	84.8271	LOC_Os07g38100.1	HVA22, putative, expressed
Os003477_01	P	8791.96	P	10192.4	P	13220	P	11556.6	P	8828.24	P	7578.98	P	5711.57	P	7113.19	P	8007.55	P	14183.8	P	16216.1	P	18396.9	P	12109.3	P	10651.3	P	8813.16	P	17702	P	17129.3	P	18168.4	LOC_Os06g03740.1	folic acid binding protein, putative, expressed
Os003479_01	P	190.648	P	177.245	P	161.537	P	317.182	P	307.61	P	266.051	P	189.606	P	214.598	P	233.887	P	277.452	P	349.74	P	381.428	P	245.108	P	210.157	P	222.143	P	270.84	P	274.135	P	328.874	LOC_Os03g17850.1	glycosyltransferase family 43 protein, putative, expressed
Os003480_01	P	5646.49	P	4850.19	P	4886.07	P	7216.85	P	5696.63	P	4271.12	P	8548.94	P	7055.77	P	5479.09	P	7650.61	P	7570.59	P	7334.44	P	6168.51	P	5810.03	P	5564.56	P	6158.26	P	6460.83	P	7825.1	LOC_Os12g29650.1	plant protein of unknown function domain containing protein, expressed
Os003485_01	P	168.43	P	166.353	A	87.3788	P	250.172	P	195.071	P	191.452	P	170.807	P	207.131	P	194.171	P	174.783	P	405.244	P	598.477	A	81.6227	A	137.326	A	218.223	P	288.787	P	215.925	P	170.674	LOC_Os03g14370.2	ACT domain containing protein, expressed
Os003494_01	P	6196.07	P	4947.77	P	3290.17	P	1368.03	P	1369.47	P	1201.97	P	2517.53	P	2752.18	P	2649.76	P	1603.68	P	1534.12	P	1607.48	P	1512.84	P	1331.62	P	1232.48	P	1450.06	P	1299.41	P	1311.33	-	-
Os003498_01	P	1217.85	P	1153.19	P	888.905	P	789.784	P	775.269	P	695.342	P	818.416	P	747.612	P	694.942	P	991.089	P	1099.85	P	1158.76	P	853.547	P	880.984	P	768.602	P	1135.58	P	1152.91	P	1038.07	LOC_Os06g03030.1	expressed protein
Os003501_02	A	87.0225	A	59.2049	A	54.3276	P	205.589	A	143.495	A	69.2285	A	57.4441	A	102.047	A	127.003	A	31.8319	A	34.8174	A	33.8169	A	0.0834429	A	13.2195	A	14.1468	A	33.3911	A	-43.2029	A	67.3682	-	-
Os003503_02	A	60.6948	A	30.6023	A	44.1309	P	203.375	P	179.666	P	222.704	A	59.1461	A	89.4131	A	117.957	A	53.7689	A	56.3845	A	39.9873	A	111.28	A	74.9456	A	53.3575	A	77.2539	A	84.1827	A	80.8911	-	-
Os003512_02	P	1248.89	P	968.745	P	905.895	P	346.916	P	438.674	P	474.22	P	423.895	P	491.919	P	446.04	P	256.266	P	221.341	P	177.787	P	219.982	P	205.578	A	135.721	P	479.355	P	425.285	P	409.099	-	-
Os003520_01	P	173.55	A	144.192	A	101.743	P	266.837	P	269.8	P	220.277	P	335.145	P	335.913	P	304.596	P	145.033	P	169.825	P	192.744	A	51.1821	A	72.6029	A	81.8413	P	226.721	P	224.66	P	202.173	LOC_Os01g34190.1	G-patch domain containing protein, expressed
Os003526_01	P	1804.18	P	1572.63	P	1158.32	P	1546.78	P	1742.2	P	1602.64	P	1639.13	P	1370.81	P	1261.61	P	1993.23	P	1917.04	P	1909.32	P	1288.29	P	1185.86	P	1008.89	P	1332.55	P	1309.5	P	1799.85	LOC_Os07g34640.1	pyruvate Pi dikinase regulatory protein, putative, expressed
Os003532_02	A	92.7797	A	94.0523	A	126.154	P	177.415	P	189.182	A	89.3917	A	78.2006	A	118.901	P	143.189	A	35.8379	A	45.831	A	58.117	A	16.9865	A	24.4261	A	11.9763	A	68.7191	A	68.6525	A	69.8615	-	-
Os003540_01	A	90.4136	A	83.7662	A	75.2159	P	208.083	P	196.934	P	191.662	P	150.751	P	169.889	P	184.032	A	45.8015	A	84.6178	A	91.2838	A	34.6168	A	45.5609	A	48.609	A	107.612	A	95.9505	A	73.9106	-	-
Os003542_02	A	60.0261	A	52.0746	A	55.1408	P	177.063	P	197.709	P	119.523	A	71.8674	A	115.937	P	149.368	A	54.3536	A	57.5715	A	77.3935	A	24.7977	A	27.5338	A	13.4983	A	70.3869	A	91.7398	A	86.3591	-	-
Os003545_01	A	73.5077	A	46.5749	A	60.4048	A	138.237	A	102.14	A	67.4438	A	79.3546	A	100.369	A	104.021	A	39.4071	A	42.5154	A	70.928	A	3.21495	A	16.2052	A	12.441	A	56.0685	A	79.8573	A	63.8355	LOC_Os01g51770.1	outer mitochondrial membrane porin, putative, expressed
Os003563_01	A	53.4186	A	41.0247	A	99.1153	A	137.104	P	175.88	A	73.3266	A	45.0547	A	71.9215	A	113.422	A	33.7328	A	44.1172	A	61.3593	A	9.54589	A	17.9207	A	18.4507	A	54.6138	A	74.5408	A	60.4375	LOC_Os06g20310.3	expressed protein
Os003565_01	A	60.1042	A	43.5842	A	48.4911	A	142.739	A	123.193	A	83.5383	A	60.3388	A	98.2433	P	161.001	A	28.8986	A	32.6693	A	57.5106	A	1.58694	A	6.16463	A	-7.65451	A	78.7043	A	75.6942	A	55.5989	LOC_Os09g32540.1	expressed protein
Os003566_01	A	43.0713	A	32.4638	A	48.1429	P	178.573	P	151.007	P	133.706	A	149.307	P	175.179	P	186.543	A	179.459	P	191.898	P	147.997	A	23.3304	A	36.9031	A	27.0939	A	71.0134	A	81.69	A	91.8567	-	-
Os003568_02	A	156.954	A	109.339	A	157.1	P	499.412	P	261.04	P	332.279	P	338.018	P	588.338	P	312.237	P	190.253	P	240.454	P	343.835	P	195.661	P	179.64	P	290.902	P	242.551	P	343.805	P	236.261	-	-
Os003571_01	A	57.705	A	67.726	A	139.025	P	150.886	P	137.793	A	113.096	A	149.784	A	109.451	P	167.519	A	123.18	A	101.495	A	88.0172	A	28.8139	A	44.357	A	61.9344	A	68.3748	P	103.284	A	88.1232	LOC_Os01g19850.1	amino acid permease family protein, putative
Os003573_01	P	994.145	P	741.275	P	797.09	P	784.171	P	632.019	P	809.566	P	734.659	P	644.849	P	474.912	P	306.878	P	377.653	P	384.701	P	275.165	P	349.778	P	398.661	P	471.669	P	415.232	P	374.889	LOC_Os02g08480.1	ubiquitin fusion degradation protein, putative, expressed
Os003576_01	P	6964.84	P	4383.21	P	1413.74	P	300.738	P	317.318	P	305.197	P	2257.13	P	2378.57	P	2440.31	P	144.012	P	391.997	P	745.172	A	85.0629	A	85.4074	A	66.1043	P	181.771	P	176.451	P	188.169	LOC_Os07g39310.1	ZOS7-06 - C2H2 zinc finger protein, expressed
Os003577_01	A	55.576	A	62.8217	A	59.2685	P	152.186	P	166.62	A	100.804	A	63.5681	A	111.975	P	158.608	A	72.2097	A	101.325	P	131.855	A	42.1429	A	66.9919	A	82.6527	A	83.7317	A	105.33	A	108.357	LOC_Os07g29750.1	glycosyl hydrolases family 16, putative, expressed
Os003578_01	P	2531.54	P	2169.83	P	2453.1	P	7004.22	P	6655.45	P	7106.66	P	9125.08	P	7973.03	P	4999.77	P	6745.2	P	9169.3	P	10448.4	P	5240.68	P	5761.73	P	6591.29	P	8019.92	P	7240.75	P	6341.01	LOC_Os03g56050.1	AP2-like ethylene-responsive transcription factor AINTEGUMENTA, putative, expressed
Os003579_01	A	70.1599	A	65.4702	A	55.1413	P	168.164	A	150.793	P	121.359	A	106.439	P	144.197	A	135.878	A	48.4172	A	61.9916	A	67.2989	A	3.21856	A	19.4126	A	12.9471	A	105.425	A	91.3733	A	76.6745	LOC_Os09g36550.1	armadillo/beta-catenin repeat family protein, putative, expressed
Os003589_01	A	68.2655	A	46.4745	A	49.5899	P	175.011	P	170.725	A	110.547	A	120.819	A	102.075	A	125.653	A	43.7386	A	45.1761	A	45.2896	A	12.204	A	18.9114	A	5.57129	A	71.7139	A	72.6132	A	62.2627	LOC_Os08g32540.1	cyclin, putative, expressed
Os003594_01	P	991.879	P	553.479	P	345.022	P	217.875	P	197.68	P	177.521	A	431.636	P	471.15	P	621.144	A	121.445	A	102.738	A	90.1703	A	9.5101	A	25.2566	A	38.3973	A	89.0891	A	97.7643	A	111.755	LOC_Os07g40570.1	WRKY DNA-binding domain containing protein, expressed
Os003610_01	A	72.1523	A	84.8978	A	57.3005	P	471.403	P	421.584	P	310.194	P	383.982	P	497.479	P	401.544	P	247.776	P	262.132	P	297.33	P	269.856	P	238.15	P	169.581	P	271.774	P	318.497	P	394.876	-	-
Os003615_01	A	68.6602	A	54.0808	A	48.3393	A	152.091	A	121.27	A	68.037	A	65.1311	A	91.4887	P	131.896	A	35.9399	A	32.3873	A	65.2757	A	15.0376	A	17.6705	A	6.62553	A	65.1518	A	79.5998	A	82.66	LOC_Os10g26720.1	exonuclease, putative, expressed
Os003618_01	A	78.6736	A	87.4246	A	98.5908	P	266.786	P	228.423	P	152.542	A	95.2855	P	159.405	P	181.226	P	142.516	P	163.895	P	162.819	P	141.402	P	169.198	P	221.248	P	187.615	P	228.48	P	239.93	LOC_Os11g40030.2	cyclin-dependent kinase inhibitor, putative, expressed
Os003619_01	A	121.096	P	153.307	P	196.546	P	256.24	P	227.924	P	207.07	P	402.954	P	293.389	P	204.762	P	305.658	P	323.011	P	306.623	P	235.395	P	205.571	P	184.451	P	342.192	P	382.491	P	378.935	-	-
Os003621_01	P	4087.98	P	6143.04	P	7251.96	P	6247.92	P	6525.25	P	6131.75	P	10452.4	P	8512.01	P	6635.3	P	10406.4	P	10942.6	P	11000.4	P	9073.97	P	8062.09	P	7397.48	P	6987.6	P	7835.99	P	8373.04	LOC_Os05g43460.1	DUF567 domain containing protein, putative, expressed
Os003622_01	P	1043.6	P	815.606	P	501.429	P	325.994	P	304.237	P	201.992	P	532.761	P	557.244	P	529.605	P	176.232	P	198.183	P	253.486	A	159.943	P	177.2	P	152.368	P	160.369	P	158.02	P	231.448	LOC_Os04g38740.1	MYB family transcription factor, putative, expressed
Os003624_01	P	745.613	P	1201.82	P	1478.61	P	1256.04	P	1105.43	P	847.274	P	1073.02	P	927.799	P	850.839	P	836.086	P	1024.95	P	1209.51	P	1003.8	P	921.023	P	783.64	P	906.701	P	893.936	P	911.082	LOC_Os02g38440.1	oxidoreductase, short chain dehydrogenase/reductase family, putative, expressed
Os003626_01	P	12518.2	P	10421	P	12409.4	P	24747.2	P	25495	P	32292.9	P	27219.7	P	19065	P	18174.7	P	33331	P	39140.4	P	39957.8	P	31464	P	30280.8	P	33819.9	P	34863.4	P	38388	P	35850.1	-	-
Os003627_01	P	755.575	P	714.066	P	625.244	P	486.078	P	497.975	P	520.01	P	477.408	P	438.583	P	446.18	P	414.625	P	479.732	P	461.862	P	373.264	P	323.852	P	321.302	P	344.657	P	341.551	P	363.162	LOC_Os01g53070.1	ATP binding protein, putative, expressed
Os003629_01	A	54.14	A	60.0703	A	45.541	A	138.164	P	181.653	P	170.233	P	149.997	P	149.598	A	146.709	A	51.2332	A	63.0182	A	88.1126	A	5.7817	A	18.1546	A	14.934	A	97.5441	P	132.204	A	104.403	LOC_Os12g42600.1	ubiquitin carboxyl-terminal hydrolase domain containing protein, expressed
Os003631_01	P	1927.7	P	1169.32	P	493.841	P	351.081	P	404.182	P	364.954	P	1003.62	P	882.538	P	709.502	P	179.271	P	182.976	A	118.722	A	93.1905	A	97.27	A	114.272	P	246.294	P	230.577	P	273.861	LOC_Os09g29360.1	helix-loop-helix DNA-binding protein, putative, expressed
Os003645_01	P	180.957	P	170.54	P	182.849	P	349.98	P	298.179	P	242.215	P	179.428	P	188.715	P	220.738	P	190.56	P	187.127	P	207.697	P	193.768	P	203.174	P	148.048	P	220.253	P	213.909	P	274.444	LOC_Os05g07820.1	leucine-rich repeat receptor protein kinase EXS precursor, putative
Os003650_01	P	250.099	P	252.295	A	168.371	P	466.978	P	506.305	P	307.571	P	477.525	P	348.65	P	425.157	P	227.285	P	218.355	P	228.99	P	218.356	A	117.455	A	53.3141	P	151.865	P	175.137	P	255.159	LOC_Os03g15740.1	uncharacterized TPR repeat-containing protein, putative, expressed
Os003654_01	P	144.21	A	117.826	A	71.1547	P	188.977	P	219.961	P	197.291	P	179.424	P	194.165	P	209.412	A	73.1501	P	145.743	A	141.211	A	44.2599	A	57.9018	A	51.8322	P	127.334	P	138.068	A	92.5206	LOC_Os06g06370.1	expressed protein
Os003659_01	P	2343.25	P	1786.02	P	989.096	P	367.956	P	365.298	P	346.067	P	645.376	P	715.717	P	887.64	P	304.812	P	301.025	P	279.765	P	276.343	P	259.001	P	213.072	P	332.086	P	357.266	P	427.601	-	-
Os003662_01	A	38.0608	A	36.436	A	23.5533	P	171.128	P	175.296	P	132.38	A	68.9721	A	112.98	P	293.255	A	36.4748	A	44.8666	A	55.138	A	4.24589	A	22.0735	A	26.4051	A	67.3238	A	107.438	P	157.334	LOC_Os09g19810.1	retrotransposon protein, putative, unclassified, expressed
Os003664_01	P	1388.44	P	1086.57	P	385.74	P	629.641	P	951.125	P	1085.66	P	553.509	P	544.328	P	468.43	P	243.81	P	246.607	P	211.872	P	159.317	P	219.951	P	175.319	P	296.284	P	312.117	P	400.324	LOC_Os11g07890.1	transposon protein, putative, CACTA, En/Spm sub-class, expressed
Os003668_01	A	52.6957	A	68.7144	A	61.1562	P	225.401	P	204.78	P	202.016	P	236.685	P	207.987	P	180.031	A	101.532	P	144.202	A	146.908	A	72.4199	A	48.0528	A	39.0036	A	101.547	P	143.271	A	144.676	LOC_Os03g22540.1	jmjC domain containing protein, expressed
Os003682_01	A	76.7426	A	68.1488	A	78.4025	P	197.757	P	210.736	A	97.2449	A	59.096	A	98.4317	A	130.233	A	65.8206	A	73.7012	A	81.1379	A	34.0131	A	40.9082	A	27.3455	A	91.3115	P	105.762	A	107.368	LOC_Os05g38790.1	IQ calmodulin-binding motif domain containing protein, expressed
Os003683_02	A	101.197	A	76.9633	A	76.6567	P	170.535	A	137.264	A	106.226	A	61.7597	A	97.0074	A	132.979	A	36.5432	A	24.4902	A	27.8976	A	3.95031	A	6.12366	A	2.46205	A	47.6671	A	61.7794	A	59.3718	-	-
Os003687_01	A	81.5961	A	77.44	A	84.8995	P	155.71	A	142.332	P	137.173	A	59.5736	A	102.821	P	150.192	A	71.9858	A	71.8422	A	81.9812	A	37.3502	A	36.6343	A	18.146	A	88.1905	A	103.409	A	119.624	LOC_Os05g39260.1	zinc finger, C3HC4 type domain containing protein, expressed
Os003688_01	A	46.2503	A	43.3028	A	82.741	P	150.66	P	157.82	P	127.165	A	82.278	A	110.422	A	118.688	A	49.9564	A	50.7444	A	61.4859	A	6.6617	A	10.5985	A	5.72214	A	60.7334	A	69.6101	A	62.7422	LOC_Os04g58060.2	methyltransferase, putative, expressed
Os003690_01	A	47.296	A	53.6364	A	52.4735	P	166.267	P	151.764	A	83.5462	A	159.855	A	137.618	A	132.319	A	39.0916	A	39.8721	A	57.7665	A	43.9336	A	67.6626	A	80.2641	A	84.6037	P	205.241	A	179.988	LOC_Os12g39920.1	hypothetical protein
Os003691_01	P	454.441	P	390.561	P	283.232	P	1330.73	P	1251.65	P	1553.54	P	1484.5	P	1424.36	P	1245.69	P	1049.31	P	1230.71	P	1231.71	P	1049.08	P	992.671	P	653.725	P	2813.18	P	1632.12	P	1462.66	LOC_Os12g31460.1	heat shock protein DnaJ, putative, expressed
Os003695_01	P	113.347	A	118.121	A	76.5632	P	179.37	P	181.036	P	143.515	P	129.464	P	180.842	P	219.596	A	68.8394	A	76.6027	A	101.531	A	33.6695	A	55.0716	A	78.4197	P	211.669	P	187.775	A	127.106	LOC_Os11g25920.1	transcription factor-related, putative, expressed
Os003704_01	P	4845.8	P	5785.98	P	7676.82	P	5443.73	P	4241.11	P	3872.38	P	3105.91	P	3302.27	P	3944.73	P	9162.15	P	7732.41	P	6776.86	P	6879.56	P	7580.35	P	7331.93	P	5054.12	P	6094.65	P	6938.15	LOC_Os08g45060.1	protein Kinase-like protein TMKL1 precursor, putative, expressed
Os003706_01	A	93.8274	A	58.8465	A	50.9265	P	176.091	A	126.295	A	92.6603	A	63.6423	A	107.515	A	128.036	A	42.9402	A	26.4969	A	24.52	A	8.57251	A	81.4897	A	108.529	A	52.1886	A	57.7109	A	60.3995	LOC_Os02g06670.1	retrotransposon protein, putative, unclassified, expressed
Os003708_01	A	140.48	A	73.7986	A	61.0181	P	255.928	P	266.646	P	169.424	P	183.61	P	172.317	P	264.622	A	188.739	A	964.895	A	1549	A	78.0874	A	57.8714	A	37.472	A	58.7821	A	89.9832	A	108.929	LOC_Os05g39230.1	low photochemical bleaching 1 protein, putative, expressed
Os003715_01	P	1403.09	P	894.585	P	506.972	P	194.378	P	186.33	P	175.796	A	665.979	P	993.584	P	887.805	A	103.685	A	94.8474	A	94.3982	A	60.6848	A	54.0029	A	42.1091	A	95.8008	A	103.849	A	98.9739	-	-
Os003719_01	A	52.4713	A	47.4829	A	65.6802	P	186.376	A	125.923	A	80.3362	A	57.3906	P	112.532	A	113.138	A	53.4641	A	59.5425	A	66.2267	A	37.0926	A	28.2041	A	19.4513	A	86.564	P	105.444	A	79.679	LOC_Os07g36544.2	serine/threonine-protein kinase receptor precursor, putative, expressed
Os003727_01	A	52.8918	A	59.902	A	72.8626	P	191.393	P	160.844	A	86.2654	A	60.9029	A	92.1048	P	200.454	A	75.2976	A	98.6238	P	110.504	A	28.7538	A	36.8966	A	18.7872	A	86.3849	A	99.0511	A	101.506	-	-
Os003732_02	A	38.3561	A	26.5303	A	35.5315	P	223.851	A	140.917	A	88.0974	A	31.4261	A	93.2218	A	133.392	A	36.0167	A	35.4456	A	38.5551	A	7.56034	A	6.66557	A	-3.67277	A	57.6875	A	60.7209	A	58.2492	-	-
Os003733_01	P	222.903	P	262.556	P	254.761	P	385.02	P	291.441	P	254.302	P	224.758	P	250.502	P	290.435	P	393.336	P	425.846	P	446.525	P	435.311	P	378.352	P	295.402	P	445.515	P	450.01	P	464.716	LOC_Os02g19924.1	aminotransferase, classes I and II, domain containing protein, expressed
Os003740_01	A	80.9844	A	68.4843	A	35.6545	P	179.997	P	159.288	P	152.154	A	70.0954	A	100.99	P	168.001	A	56.5766	A	59.2813	A	73.7633	A	23.0439	A	29.1497	A	8.68618	A	94.3786	A	86.3671	A	85.3816	LOC_Os05g29090.1	transposon protein, putative, CACTA, En/Spm sub-class, expressed
Os003744_01	A	37.9089	A	25.2705	A	45.3345	P	193.878	P	169.273	P	132.189	A	47.7818	A	100.748	A	128.355	A	65.5221	A	69.2829	A	75.7128	A	3.42882	A	10.6824	A	14.4023	A	51.1854	A	66.3114	A	51.0802	LOC_Os12g01220.1	expressed protein
Os003747_02	A	113.301	A	106.419	A	58.3539	P	182.391	P	167.151	A	108.013	P	155.18	P	188.115	P	234.887	A	101.971	A	94.4876	P	115.961	A	31.8134	A	30.9802	A	32.1353	A	92.0376	P	124.328	A	104.231	-	-
Os003759_01	A	83.1352	A	65.1902	A	84.8601	P	198.098	P	140.621	P	131.491	P	139.175	P	174.783	P	202.569	A	99.4567	A	113.382	A	99.0785	A	87.7225	A	57.5228	A	25.3423	A	69.6263	A	85.4791	A	112.043	LOC_Os04g22380.1	short chain dehydrogenase/reductase protein, putative, expressed
Os003762_01	A	51.1497	A	40.8239	A	38.5221	P	255.338	P	226.928	P	227.421	P	224.564	P	297.004	P	282.3	P	163.647	P	243.754	P	295.176	P	147.727	P	159.88	A	91.7244	P	147.543	P	165.789	P	166.61	LOC_Os05g49590.2	suppressor of phythchrome A, putative, expressed
Os003765_01	A	99.3552	A	84.521	A	54.924	P	207.961	P	227.256	P	239.554	P	239.392	P	206.565	P	263.266	P	116.783	A	110.268	A	132.898	P	107.022	A	88.9109	A	61.9536	A	110.641	P	144.178	P	229.603	LOC_Os07g04160.2	peptidyl-prolyl cis-trans isomerase, FKBP-type, putative, expressed
Os003766_01	P	7201.24	P	5131.46	P	1507.46	P	203.179	P	165.745	P	152.216	A	1213.99	P	2282.72	P	1987.72	A	57.203	A	57.0328	A	100.87	A	11.9832	A	10.0329	A	10.4704	A	79.7202	A	67.5341	A	84.9951	LOC_Os10g40934.1	flavonol synthase/flavanone 3-hydroxylase, putative, expressed
Os003769_01	P	386.145	P	436.558	P	319.349	P	411.468	P	409.756	P	394.853	P	415.458	P	424.154	P	441.366	P	361.485	P	384.089	P	349.163	P	452.96	P	405.739	P	387.447	P	411.409	P	394.365	P	363.493	LOC_Os03g49350.1	lipozygenase protein, putative, expressed
Os003776_01	P	2324.73	P	1956.51	P	3157.22	P	3636.86	P	1995.3	P	2735.27	P	2015.07	P	2107.73	P	2691.87	P	2833.52	P	2734.64	P	4508.83	P	3286.8	P	3176.84	P	4736.61	P	4819.14	P	5172.52	P	2700.15	LOC_Os12g38290.1	metallothionein, putative, expressed
Os003781_01	P	3790.26	P	3879.49	P	4353.77	P	4966.45	P	5546.39	P	5553.83	P	3856.62	P	4115.5	P	3884.21	P	6320.29	P	5931.38	P	6046.24	P	10690.6	P	8186.06	P	5031.05	P	5505.61	P	6295.33	P	5657.01	LOC_Os11g17440.1	enoyl-CoA hydratase/isomerase family protein
Os003782_01	A	65.1945	A	53.2455	A	54.1548	A	163.547	A	117.797	P	123.859	A	52.4722	A	88.779	P	161.826	A	86.6385	A	95.9221	A	80.0107	A	23.3892	A	27.8743	A	28.2388	A	60.885	A	75.306	A	69.2612	LOC_Os12g39720.1	retrotransposon protein, putative, unclassified, expressed
Os003787_01	P	264.218	P	210.302	A	113.847	A	141.405	P	159.061	A	101.557	A	165.668	P	216.682	P	250.247	A	43.1497	A	37.7265	A	46.9156	A	8.58259	A	9.81956	A	12.2745	A	71.4231	A	69.3747	A	58.5053	-	-
Os003794_01	A	56.8781	A	39.0598	A	40.9877	P	176.543	P	151.543	A	75.1774	A	66.8129	A	109.168	P	152.197	A	60.2058	A	57.0895	A	68.2593	A	20.5051	A	27.7983	A	16.2282	A	72.8627	A	-76.7305	A	72.8671	LOC_Os09g27010.1	tyrosine protein kinase domain containing protein, putative, expressed
Os003800_01	A	62.8995	A	51.1907	A	44.6852	P	333.245	P	318.291	P	407.328	A	320.227	P	365.18	P	341.93	P	177.139	P	162.738	P	222.949	A	59.7438	P	196.925	P	237.76	P	203.264	P	179.014	A	157.84	LOC_Os02g08490.1	chaperone protein clpB 1, putative, expressed
Os003803_01	A	81.0325	A	68.8871	A	77.8876	P	599.305	P	669.532	P	880.747	P	503.424	P	301.53	P	411.632	P	257.652	P	330.504	P	465.257	P	293.72	P	237.152	A	198.885	P	236.429	P	189.862	P	192.396	LOC_Os02g48620.2	tetratricopeptide repeat, putative, expressed
Os003807_01	P	3471.69	P	2742.4	P	2333.46	P	3631.81	P	3423.25	P	3536.55	P	4552.22	P	4838.07	P	3949.5	P	4806.08	P	5896.43	P	6372.33	P	4386.18	P	4613.55	P	5153.62	P	4704.74	P	4824.47	P	3940.58	LOC_Os02g58310.2	expressed protein
Os003811_01	A	78.7036	A	47.6203	A	72.4774	P	211.57	P	176.952	P	198.444	P	173.681	P	258.441	P	220.497	P	125.482	P	150.637	P	175.662	A	60.6282	A	79.3408	A	72.9155	A	118.741	P	151.45	P	122.03	LOC_Os02g03090.2	expressed protein
Os003812_01	P	389.276	P	327.011	P	221.604	P	183.275	P	153.878	P	123.676	A	265.41	P	364.059	A	372.765	A	45.4428	A	74.8712	P	124.513	A	67.8812	A	48.3636	A	14.68	A	77.4703	A	84.6654	A	64.3852	LOC_Os05g40160.1	NB-ARC domain containing protein, expressed
Os003816_01	A	36.2154	A	26.0327	A	43.3479	P	181.033	P	155.839	A	68.6487	A	52.0068	A	73.4599	A	114.588	A	46.2092	A	28.6083	A	57.0097	A	4.53364	A	21.37	A	12.5983	A	57.0779	A	64.178	A	53.3289	-	-
Os003817_01	P	143.117	A	105.263	A	72.0687	P	166.802	P	148.497	A	114.637	A	79.678	P	154.451	A	156.617	A	65.5008	A	77.77	A	73.9374	A	22.6836	A	24.8227	A	7.39175	A	74.1514	A	32.236	A	78.1879	-	-
Os003820_01	P	232.797	P	213.303	P	233.564	P	260.687	P	214.991	P	190.111	P	159.674	P	255.073	P	284.911	P	146.358	P	132.617	P	129.942	A	113.456	A	104.34	A	104.16	P	148.868	P	136.505	P	149.512	-	-
Os003822_01	P	4043.12	P	4467.35	P	5969.97	P	5141.92	P	3663.84	P	3163.54	P	4285.87	P	3895.07	P	3914.69	P	8724.02	P	7986.07	P	7234.68	P	6216.18	P	7326.12	P	7523.74	P	5084.63	P	6881.53	P	7343.13	LOC_Os07g46400.1	expressed protein
Os003828_01	P	1687.48	P	1014.71	P	553.092	P	193.323	P	183.696	P	155.395	A	1479.05	P	1930.07	P	1292.61	A	55.3217	A	60.1738	A	70.05	A	93.3754	A	59.6996	A	20.9017	A	78.1417	A	112.702	P	124.068	LOC_Os04g26260.1	hypothetical protein
Os003832_01	A	67.9363	A	53.2776	A	44.0726	P	204.392	P	220.333	P	170.795	P	198.337	P	175.073	P	251.066	A	77.9686	A	107.282	A	127.558	A	52.182	A	47.7223	A	33.3966	A	77.8008	A	108.144	P	140.824	LOC_Os02g15220.4	bromodomain containing protein, expressed
Os003840_01	A	56.8142	A	37.863	A	57.4049	P	234.071	P	216.81	P	220.013	A	65.218	A	108.577	P	221.082	A	83.4232	A	82.5558	A	94.9998	A	33.0234	A	21.3684	A	25.8482	A	61.7542	A	67.0244	A	75.4311	-	-
Os003843_01	A	132.261	A	90.1497	A	80.3643	P	223.687	P	184.834	P	176.744	P	246.779	P	286.965	P	263.514	P	139.062	P	166.548	P	174.693	A	57.0498	A	65.2748	A	87.34	A	111.229	A	108.417	P	175.358	LOC_Os09g14520.1	integral membrane protein, putative, expressed
Os003845_01	P	17876	P	14145.7	P	11254.6	P	18521.6	P	19480.1	P	21576.9	P	31851.1	P	28606.9	P	20079.5	P	34048.8	P	29010.6	P	24096	P	25099.6	P	26447	P	27814.2	P	25824.8	P	28155.9	P	29905.9	-	-
Os003847_01	A	40.3215	A	37.0173	A	28.6932	A	109.865	A	86.329	A	78.269	A	27.1693	A	65.7512	A	98.4764	A	46.9344	A	43.1498	A	54.7063	A	2.74935	A	9.15145	A	9.05079	A	59.5908	A	54.4088	A	48.502	LOC_Os01g25760.1	powdery mildew resistance protein PM3F, putative, expressed
Os003848_01	A	12.0768	A	19.2689	A	9.20541	A	101.243	P	160.724	P	170.408	A	69.6532	A	59.7494	A	71.6733	A	51.7176	A	67.7127	A	74.776	A	62.9848	A	40.2653	A	16.4016	A	92.9867	A	117.689	A	96.0855	LOC_Os04g12010.2	glycosyltransferase, putative, expressed
Os003849_01	P	218.16	P	164.106	P	163.512	P	197.379	P	220.04	P	203.337	P	269.784	P	241.738	P	322.999	P	120.791	P	135.396	A	122.641	A	71.2506	A	47.1248	A	38.3287	A	84.9435	A	93.8284	A	84.1342	LOC_Os02g27110.1	expressed protein
Os003851_01	P	468.134	P	406.837	P	165.012	P	255.268	P	180.654	P	203.964	P	271.753	P	276.547	P	289.141	A	88.2721	A	122.554	P	122.887	A	111.792	A	103.734	A	50.5015	P	136.756	P	121.251	P	125.861	-	-
Os003854_01	P	495.647	P	332.482	P	204.559	P	189.095	P	194.154	P	201.635	A	302.672	P	328.557	P	332.073	P	191.901	P	155.974	P	155.633	A	86.9104	A	86.9498	A	61.0134	P	199.633	P	194.547	P	173.658	LOC_Os08g32880.1	disease resistance protein RPM1, putative
Os003858_01	A	80.9246	A	59.6921	A	70.8208	P	183.112	P	171.974	P	135.491	A	96.811	A	104.903	A	151.606	A	34.9146	A	57.653	A	52.6185	A	17.8657	A	11.1666	A	26.8686	A	67.2092	A	80.5431	A	65.8314	LOC_Os01g73750.1	Leucine Rich Repeat family protein, expressed
Os003859_02	P	345.992	P	303.216	P	253.741	P	563.604	P	703.538	P	787.256	P	830.449	P	602.522	P	814.238	P	475.809	P	447.65	P	487.882	P	441.883	P	399.899	P	377.974	P	404.404	P	425.582	P	338.886	-	-
Os003875_01	A	87.5575	A	50.9682	A	65.8749	P	202.309	P	147.915	P	129.033	A	153.897	P	141.992	A	124.404	A	48.0078	A	53.4751	A	67.0739	A	17.3939	A	23.6059	A	19.6722	A	66.7333	A	73.0881	A	66.0718	LOC_Os07g32890.1	3'-5' exonuclease, putative, expressed
Os003879_01	A	77.3804	A	74.8828	P	102.597	P	476.324	P	455.277	P	669.713	P	532.67	P	419.277	P	435.445	P	461.375	P	386.181	P	447.48	P	461.395	P	391.547	P	395.889	P	517.021	P	747.907	P	354.477	LOC_Os02g30110.1	cytochrome P450, putative, expressed
Os003880_01	P	167.401	P	223.453	P	161.503	P	181.288	P	220.505	P	189.024	P	271.124	P	306.648	P	290.379	A	64.003	A	59.7155	A	81.3726	A	41.5865	A	39.9923	A	22.7179	A	89.5972	P	123.562	A	104.885	LOC_Os11g04830.1	embryogenesis transmembrane protein, putative, expressed
Os003883_01	P	2263.13	P	1323.02	P	826.782	P	183.69	P	172.965	P	160.628	A	739.323	P	998.418	P	1105.55	A	57.1416	A	82.7031	A	88.6158	A	35.8484	A	37.3323	A	33.783	P	115.479	P	155.025	P	133.162	LOC_Os03g53170.1	pentatricopeptide, putative, expressed
Os003886_01	P	159.93	A	132.03	P	114.065	P	203.877	P	186.167	P	158.699	A	126.774	P	178.792	A	165.323	A	45.8774	A	69.9277	A	74.0482	A	22.6035	A	37.542	A	41.4621	P	121.854	P	130.722	A	110.628	LOC_Os03g53880.2	serine/threonine-protein kinase TOUSLED, putative, expressed
Os003896_01	A	46.1151	A	38.4652	A	49.1237	P	248.626	P	223.377	P	247.534	P	387.22	P	295.14	P	254.878	A	109.697	P	267.188	P	375.658	A	114.698	A	125.015	A	125.899	P	245.67	P	197.064	P	198.783	LOC_Os02g45240.1	zinc finger family protein, putative, expressed
Os003899_01	A	45.6884	A	39.8963	A	46.4468	A	140.549	P	178.341	P	201.739	P	172.098	P	138.044	P	155.313	A	88.8458	P	135.777	A	132.227	A	37.9671	A	42.5257	A	32.4993	A	95.1882	A	95.818	A	75.3228	LOC_Os03g53760.1	ATP-dependent RNA helicase DHX36, putative, expressed
Os003908_01	P	807.186	P	471.081	P	190.462	P	209.975	P	192.835	P	161.417	A	618.815	P	590.365	P	193.245	A	47.8251	A	56.5985	A	68.5007	A	23.6953	A	39.4839	A	40.9124	A	84.3786	A	99.4972	A	73.7876	LOC_Os06g36590.1	transporter, monovalent cation:proton antiporter-2 family, putative, expressed
Os003938_01	P	279.317	P	287.517	P	211.295	P	346.366	P	404.944	P	467.18	P	274.135	P	276.647	P	272.581	P	234.22	P	264.771	P	274.121	P	206.735	P	219.136	P	240.551	P	247.715	P	254.94	P	258.239	-	-
Os003943_01	A	74.4515	A	58.8233	A	43.3369	P	224.547	P	267.543	P	310.134	P	243.928	P	193.827	P	199.625	P	172.053	P	153.924	P	239.609	P	221.942	P	217.485	A	103.403	A	128.588	P	142.729	P	265.359	LOC_Os10g37330.1	oxidoreductase, aldo/keto reductase family protein, putative, expressed
Os003956_02	P	167.768	A	114.966	A	70.9287	P	432.688	P	219.487	A	98.1382	A	138.457	P	359.022	P	603.235	P	550.67	P	225.288	A	67.2345	P	443.578	A	78.8367	A	60.1396	A	93.2346	P	173.476	P	357.634	-	-
Os003957_01	P	10462.9	P	12127.3	P	10611.2	P	3540.55	P	3008.6	P	2246.99	P	2997.64	P	2770.61	P	4270.62	P	4985.16	P	4109.65	P	4205.47	P	4884.83	P	4598.2	P	3982.24	P	5679.77	P	4328.81	P	5901.67	LOC_Os07g42220.1	expressed protein
Os003960_01	P	8073.02	P	9045.51	P	8735.22	P	3818.87	P	3673.94	P	3859.53	P	3201.76	P	3303.06	P	4015.11	P	6739.43	P	6677.37	P	6439.85	P	4268.68	P	5385.76	P	6602.55	P	6006.07	P	5807.34	P	6509.21	LOC_Os03g38390.1	GDSL-like lipase/acylhydrolase, putative, expressed
Os003962_02	P	110.998	P	216.988	P	192.562	P	193.019	P	203.599	P	168.48	A	146.941	P	185.701	P	203.904	A	70.3284	P	124.506	P	147.856	A	129.177	A	130.488	A	140.234	P	162.362	P	148.742	P	174.464	-	-
Os003964_01	P	230.195	P	262.734	A	227.461	P	461.955	P	380.298	P	228.954	P	230.445	P	299.501	P	417.872	P	325.418	P	297.585	P	341.785	P	1039.66	P	644.853	P	349.376	P	306.589	P	256.873	P	340.616	LOC_Os05g47830.1	expressed protein
Os003967_01	P	147.485	P	178.861	P	190.081	P	563.8	P	501.018	P	516.661	P	471.233	P	565.436	P	449.508	P	536.205	P	628.269	P	585.868	P	689.854	P	475.163	P	301.59	P	347.298	P	399.871	P	445.942	LOC_Os07g01310.1	glutamate receptor, putative, expressed
Os003977_01	P	7148.24	P	8992.07	P	9082.52	P	5182.68	P	3519.84	P	1744.04	P	2800.92	P	4817.76	P	9802.39	P	6334.01	P	5258.59	P	3342.03	P	7599.5	P	5906.19	P	5228.31	P	4619.21	P	5599.93	P	5779.49	-	-
Os003980_01	A	50.0259	A	39.5062	A	51.2603	P	129.87	A	107.832	A	88.4523	A	70.4804	A	102.652	A	140.18	A	48.7667	A	48.7494	A	40.3648	A	4.78433	A	12.1662	A	1.2509	A	74.1994	A	81.0037	A	67.4975	LOC_Os08g15090.1	diacylglycerol kinase catalytic domain family protein, expressed
Os003983_01	A	33.897	A	37.21	A	28.5431	P	147.329	A	99.5414	A	75.1828	A	85.1499	A	129.705	P	163.835	A	58.6654	A	47.8173	A	56.8315	A	6.8896	A	16.2043	A	2.56828	P	246.147	P	299.58	P	248.522	LOC_Os11g10570.1	NBS-LRR disease resistance protein, putative
Os003986_01	A	87.2963	A	60.0654	A	53.4004	P	147.551	P	171.451	P	124.808	P	141.981	P	157.175	P	165.647	A	63.4798	A	93.2873	P	150.16	A	28.78	A	28.2875	A	35.0326	A	80.6435	A	94.3615	A	65.7762	LOC_Os03g58920.2	galactosyltransferase family protein, putative, expressed
Os003987_01	P	5777.34	P	4737.62	P	3447.62	P	7728.81	P	7492.03	P	6333.31	P	6493.48	P	7125.42	P	6964.86	P	5537.94	P	4821.53	P	4577.57	P	4844.53	P	4361.75	P	3116.4	P	4766.35	P	4638.37	P	4811.16	-	-
Os003989_01	P	329.099	P	263.684	P	277.873	P	2961.05	P	2993.61	P	3289.47	P	1717.8	P	7399.79	P	2726.4	P	2797.49	P	4676.55	P	4294.73	P	3342.21	P	3442.79	P	3743.53	P	2642.83	P	4276.42	P	4556.41	LOC_Os07g32570.2	OsAPRL1 adenosine 5'-phosphosulfate reductase-like OsAPRL1, expressed
Os003994_01	A	34.0375	A	36.4788	A	52.0035	A	126.427	A	92.5657	A	59.509	A	32.6446	A	95.0015	A	139.904	A	26.6701	A	32.755	A	42.1386	A	4.5677	A	5.51858	A	-1.94231	A	57.9274	A	72.9379	A	53.4241	LOC_Os01g06000.1	PPR repeat containing protein, expressed
Os003999_01	P	217.118	P	211.215	P	250.908	P	335.91	P	294.357	P	248.371	P	245.702	P	294.483	P	331.248	P	235.102	P	264.289	P	301.632	P	220.203	P	234.738	P	221.888	P	313.506	P	318.419	P	320.733	LOC_Os02g37690.1	UDP-glucoronosyl and UDP-glucosyl transferase, putative, expressed
Os004000_01	P	1015.09	P	996.819	P	1364.9	P	2309.71	P	2185.77	P	1852.18	P	2063.32	P	2012.88	P	1809.04	P	2090.33	P	2418.4	P	2719.12	P	2350.22	P	2323.7	P	1910.09	P	2521.77	P	2349.8	P	2112.34	LOC_Os12g39360.1	aspartic proteinase nepenthesin precursor, putative, expressed
Os004001_01	A	73.5804	A	43.6882	A	51.3284	P	148.928	A	118.739	A	87.3165	A	66.6096	A	161.975	P	313.196	A	95.234	A	73.3175	A	60.2394	A	1.73737	A	17.9944	A	4.14625	A	69.2181	A	82.0133	A	67.9765	LOC_Os01g46240.1	lipase class 3 family protein, putative, expressed
Os004009_01	A	48.162	A	35.4532	A	32.5857	A	127.429	A	107.567	A	78.9808	A	57.8506	A	85.1952	A	98.3109	A	29.4513	A	37.5649	A	50.2285	A	76.9482	A	58.0854	A	6.42237	A	50.5598	A	55.6616	A	39.9272	-	-
Os004012_01	P	210.821	P	242.473	P	203.864	A	177.913	P	174.767	A	103.114	A	136.142	P	169.123	A	116.394	A	65.9927	A	84.2663	A	63.2395	A	57.6216	A	63.6021	A	47.3848	A	137.362	A	94.6909	A	85.8376	LOC_Os01g57560.1	serine/threonine-protein kinase receptor precursor, putative, expressed
Os004014_01	A	49.6405	A	41.9572	A	43.8323	P	184.854	P	204.114	P	203.057	A	237.97	P	175.117	P	178.965	A	102.053	P	192.227	P	191.348	A	72.1158	A	56.9208	A	42.8301	A	96.9699	A	98.3531	A	77.475	LOC_Os04g21110.1	phosphoribulokinase/Uridine kinase family protein, expressed
Os004023_01	P	24843.1	P	22129.2	P	19374.8	P	32481.4	P	39377.9	P	44961.5	P	49288.1	P	45220.6	P	42038.6	P	50141.6	P	43313.3	P	38011.4	P	44749.9	P	47525.9	P	47213.4	P	49261.5	P	48287.1	P	47005.4	LOC_Os10g35040.1	receptor kinase like protein, putative
Os004024_01	P	9831.23	P	13403	P	18379.8	P	12379.1	P	12251.2	P	11748.7	P	11544.1	P	12630.7	P	12446.8	P	12772.3	P	14999.1	P	17064.6	P	13845.1	P	14701.4	P	15470.6	P	17640.5	P	18000	P	15723.1	LOC_Os01g12770.1	cytochrome P450, putative, expressed
Os004031_01	P	156.817	A	137.827	A	93.3625	P	288.74	P	344.427	P	407.292	P	334.084	P	229.629	P	306.488	P	244.909	P	170.885	P	307.42	P	288.602	P	224.186	A	107.396	P	192.322	P	203.314	P	321.262	LOC_Os05g36360.1	U-box domain containing protein, expressed
Os004049_01	P	230.382	P	191.944	P	158.866	P	192.741	P	180.115	P	154.681	A	157.858	P	269.472	P	319.859	A	96.813	A	82.531	A	89.4891	A	43.8785	A	40.0456	A	24.9175	A	55.6253	A	76.8707	A	90.6502	LOC_Os02g17292.1	retrotransposon protein, putative, unclassified, expressed
Os004050_01	P	666.052	P	639.773	P	645.941	P	1607.26	P	1590.77	P	1511.7	P	1447.78	P	1276.87	P	1578.56	P	1722.13	P	1652.57	P	1740.81	P	1442.77	P	1415.27	P	1175.85	P	1323.11	P	1383.89	P	1480.79	LOC_Os02g56940.1	expressed protein
Os004051_01	P	804.534	P	805.416	P	517.743	P	334.271	P	337.032	P	289.556	P	349.647	P	378.641	P	422.358	P	309.774	P	346.904	P	367.193	P	230.866	P	275.797	P	293.079	P	352.345	P	338.555	P	413.179	LOC_Os06g43370.1	cytochrome P450, putative, expressed
Os004059_01	P	259.469	P	290.968	P	337.128	P	943.702	P	1017.39	P	1124.46	P	1007.63	P	791.449	P	737.446	P	658.32	P	820.758	P	1027.29	P	751.94	P	639.362	P	607.352	P	628.962	P	812.545	P	636.885	LOC_Os07g37320.1	transporter family protein, putative, expressed
Os004064_01	P	425.664	P	466.079	P	538.914	P	1264.59	P	1232.72	P	945.092	P	887.339	P	852.912	P	827.197	P	544.5	P	735.404	P	864.917	P	701.78	P	596.297	P	586.427	P	1012.5	P	619.581	P	721.232	LOC_Os03g24590.1	mTERF domain containing protein, expressed
Os004071_01	A	73.1807	A	67.208	A	50.3841	P	171.524	A	109.915	A	80.3135	A	33.5078	A	101.503	A	129.041	A	36.9943	A	34.4173	A	55.6984	A	24.1525	A	10.666	A	0.363555	A	58.9448	A	79.6732	A	64.491	-	-
Os004073_01	A	93.131	A	73.0012	A	57.7237	P	176.644	P	182.249	P	127.643	A	96.5473	A	105.172	A	128.008	A	55.4	A	48.1062	A	50.4919	A	10.7956	A	14.4155	A	6.67179	A	57.4735	A	64.3431	A	63.8753	LOC_Os07g35240.1	transposon protein, putative, CACTA, En/Spm sub-class
Os004074_01	A	50.7865	A	32.2718	A	53.9944	P	173.568	P	162.496	P	131.948	A	77.2061	A	93.9369	A	141.92	A	50.7575	A	62.5213	A	75.2846	A	16.1275	A	32.2696	A	20.1628	A	58.0667	A	83.0478	A	74.6765	LOC_Os10g38900.1	erythronate-4-phosphate dehydrogenase, putative, expressed
Os004085_01	A	58.9272	A	45.4858	A	42.3496	A	113.498	A	104.464	A	104.31	A	50.9358	A	82.2508	A	93.7677	A	31.2304	A	30.3864	A	43.2032	A	1.83017	A	2.89247	A	6.76	A	54.7425	A	49.2929	A	59.1502	-	-
Os004097_01	A	63.4654	A	39.0527	A	65.594	P	349.709	P	499.667	P	319.699	P	411.072	P	183.385	P	261.677	P	206.477	P	236.608	P	181.67	P	145.594	A	100.319	A	93.1183	P	145.267	P	185.979	P	190.757	LOC_Os12g12934.1	peptide transporter PTR3-A, putative, expressed
Os004100_01	P	411.868	P	392.706	A	102.605	A	116.842	A	107.043	A	92.1075	A	269.266	A	307.71	A	289.922	A	43.9006	A	47.3716	A	56.5978	A	9.26585	A	9.82559	A	-1.11103	A	58.8886	A	63.6412	A	56.3187	LOC_Os11g44630.1	calmodulin binding protein, putative, expressed
Os004115_01	P	222.855	A	150.333	A	84.0384	P	441.133	P	437.11	P	378.195	P	242.211	P	236.292	P	253.862	P	171.009	P	199.162	P	263.69	P	238.591	P	254.639	P	342.646	P	255.663	A	149.327	P	171.813	LOC_Os02g45070.1	PINHEAD, putative, expressed
Os004117_01	P	246.816	P	197.059	P	178.523	P	147.441	P	169.151	A	67.5089	P	480.298	P	476.6	P	655.763	A	30.5964	A	34.8296	A	52.8779	A	24.1632	A	12.6106	A	11.2548	P	197.67	P	230.351	P	201.451	LOC_Os11g29110.1	Leucine Rich Repeat family protein, expressed
Os004125_01	P	581.696	P	849.786	P	955.535	P	353	P	294.032	P	255.13	P	387.656	P	324.263	P	370.422	P	475.673	P	601.014	P	701.552	P	890.416	P	711.187	P	505.505	P	646.072	P	462.077	P	558.179	LOC_Os06g03050.1	expressed protein
Os004130_01	A	32.625	A	36.6193	A	42.8701	A	132.324	P	136.749	A	90.2763	A	52.0063	A	66.2045	A	107.922	A	36.1675	A	37.3321	A	44.9804	A	-15.7267	A	-2.38142	A	-3.37199	A	53.8695	A	64.4272	A	43.0594	-	-
Os004137_01	P	179.031	P	156.884	P	189.572	P	433.161	P	356.96	P	338.454	P	214.257	P	253.019	P	267.902	P	296.933	P	327.268	P	292.133	P	220.031	P	258.406	P	360.099	P	262.853	P	270.586	P	268.322	LOC_Os08g07290.1	HEAT repeat family protein, putative, expressed
Os004141_02	A	74.0973	A	66.3258	A	43.365	P	300.694	P	300.315	P	275.473	P	267.145	P	240.645	P	273.064	P	146.154	P	141.748	A	119.882	A	54.087	A	71.2033	A	73.3312	A	122.153	A	107.212	A	115.343	-	-
Os004143_01	A	56.6213	A	39.2219	A	38.1291	P	200.575	A	140.574	A	82.8497	A	57.5299	A	89.6797	P	163.57	A	54.9231	A	46.2971	A	31.7422	A	13.6357	A	17.5412	A	-7.08215	A	61.1758	A	77.8194	A	99.806	LOC_Os11g35840.1	conserved hypothetical protein
Os004148_01	P	174.956	A	127.706	A	65.4755	A	119.291	P	140.082	A	89.4374	A	109.625	A	116.122	A	114.474	A	60.2735	A	73.4964	A	113.848	A	1.13035	A	31.391	A	47.9733	A	56.3353	A	72.3568	A	56.2829	LOC_Os05g24890.1	tetratricopeptide-like helical, putative, expressed
Os004152_01	P	268.38	P	271.221	P	314.962	P	295.785	P	262.78	P	269.778	P	230.062	P	266.757	P	291.991	P	473.582	P	427.26	P	368.739	P	218.465	P	286.572	P	383.312	P	293.235	P	329.174	P	301.268	LOC_Os06g47470.1	TKL_IRAK_DUF26-lh.2 - DUF26 kinases have homology to DUF26 containing loci, expressed
Os004153_02	A	52.4599	A	48.2939	A	60.0945	P	281.726	P	228.231	P	291.262	P	229.1	P	215.071	P	160.891	P	197.964	P	294.725	P	368.708	P	169.252	P	207.529	P	286.092	P	203.749	P	282.764	P	290.767	-	-
Os004155_01	A	45.0999	A	37.7133	A	30.049	A	153.637	A	132.373	A	110.959	A	89.6487	A	94.868	P	188.731	A	54.222	A	54.0556	A	66.0558	A	11.8723	A	12.5982	A	0.629323	A	61.615	A	68.8954	A	60.6187	LOC_Os02g04970.1	expressed protein
Os004160_01	A	66.49	A	49.0599	A	55.5926	A	109.04	A	89.7051	A	59.6367	A	40.6307	A	81.0818	A	130.266	A	37.8945	A	38.1899	A	58.7833	A	14.6805	A	4.06666	A	6.01704	A	54.5171	A	65.2859	A	60.5457	-	-
Os004168_01	P	9469.17	P	11660.4	P	13438.3	P	10767.1	P	8918.89	P	6909.13	P	5713.68	P	6838.22	P	8595.18	P	10768.1	P	12511.7	P	13276.2	P	15240.2	P	13153	P	10489.8	P	9734.2	P	9471.55	P	11739.5	LOC_Os08g41000.1	extracellular ligand-gated ion channel, putative, expressed
Os004175_01	A	48.2534	A	56.6178	A	50.5894	P	281.323	P	299.137	P	354.793	P	488.769	P	597.749	P	313.772	P	256.644	P	393.739	P	488.375	P	197.328	P	251.628	A	197.74	P	214.362	P	246.164	P	242.889	LOC_Os02g21460.1	uncharacterized protein yqjG, putative, expressed
Os004190_01	A	89.0525	A	64.5315	A	72.2062	A	122.057	A	99.9237	A	79.4207	A	69.0277	A	109.505	P	181.329	A	34.3836	A	37.5449	A	55.651	A	28.671	A	26.5475	A	0.669567	A	66.4253	A	67.3204	A	58.2456	LOC_Os02g05720.1	pentatricopeptide repeat protein PPR986-12, putative, expressed
Os004205_01	A	86.2035	A	48.6315	A	64.7824	P	172.828	P	154.527	P	134.078	A	82.3237	A	83.8569	A	138.031	A	42.5779	A	39.8466	A	41.5504	A	7.36587	A	15.4257	A	16.8736	A	60.3558	A	67.2962	A	75.9099	LOC_Os04g15660.1	receptor kinase, putative
Os004207_01	A	98.0066	A	67.6301	A	64.9502	P	217.128	P	246.916	P	210.366	P	215.956	P	160.835	P	309.625	A	122.73	A	76.1617	A	103.872	A	87.4846	A	57.3244	A	23.1258	A	66.3152	A	80.0941	A	93.4989	LOC_Os06g16980.2	DNA topoisomerase I family protein, expressed
Os004217_02	A	162.741	A	164.558	A	147.68	P	721.622	P	743.448	P	720.949	P	591.147	P	704.236	P	682.236	P	426.234	P	470.129	P	540.5	P	505.076	P	382.533	P	257.043	P	526.219	P	541.373	P	566.063	-	-
Os004218_01	P	184.471	A	113.395	A	67.1661	P	209.233	P	180.351	P	127.02	P	188.176	P	222.259	P	178.758	A	65.1609	A	56.6806	A	66.6393	A	35.7412	A	20.4469	A	5.29151	A	68.7138	A	78.3519	A	68.9383	LOC_Os06g30179.1	cytochrome P450, putative, expressed
Os004223_01	A	59.6145	A	42.5279	A	66.6242	P	255.9	P	237.912	P	168.993	P	268.651	P	227.619	P	482.561	A	186.727	P	159.293	P	190.728	P	275.337	P	276.14	P	222.091	P	145.155	P	165.879	P	216.608	LOC_Os08g33200.1	1-phosphatidylinositol-4-phosphate 5-kinase/ zinc ion binding protein, putative, expressed
Os004225_02	A	44.9795	A	35.1192	A	43.5691	P	159.907	P	141.232	A	100.614	A	44.0041	A	96.1339	A	128.632	A	36.1227	A	46.3248	A	48.882	A	4.09112	A	28.4602	A	50.27	A	60.953	A	73.8611	A	66.5174	-	-
Os004228_01	P	306.55	P	313.101	P	344.253	P	555.02	P	758.734	P	843.353	P	570.37	P	508.968	P	532.66	P	520.313	P	435.431	P	545.182	P	513.3	P	610.201	P	711.221	P	847.533	P	732.909	P	556.142	LOC_Os09g27500.1	cytochrome P450, putative, expressed
Os004235_01	A	64.8532	A	52.111	A	77.382	P	218.836	P	235.219	P	151.527	A	100.96	P	169.077	P	176.203	A	59.9453	A	85.6834	A	99.9442	A	37.2128	A	42.3023	A	39.8455	A	98.7079	P	146.468	P	126.89	LOC_Os09g32610.1	expressed protein
Os004238_01	P	818.577	P	583.085	P	357.094	P	298.908	P	296.116	P	243.206	P	532.883	P	524.492	P	628.464	A	113.762	A	109.979	A	113.588	A	105.598	A	89.0456	A	45.4624	A	87.0143	A	106.666	A	98.2753	LOC_Os07g33100.1	uncharacterized ACR, COG1590 family protein, expressed
Os004239_02	P	136.353	P	157.535	P	174.987	P	263.394	P	176.252	A	136.018	A	102.782	P	140.037	P	175.529	P	179.772	P	153.507	P	165.11	P	154.41	A	94.668	A	102.761	P	153.995	P	134.597	P	178.518	-	-
Os004240_01	A	64.6485	A	67.4814	A	103.084	P	209.052	P	180.17	A	110.524	A	68.7523	A	106.872	A	170.408	A	53.3384	A	53.1667	A	72.5363	A	14.6288	A	15.3918	A	9.13837	A	55.3462	A	83.0855	A	68.4357	LOC_Os12g37740.1	resistance protein LR10, putative, expressed
Os004245_01	P	255.328	P	201.785	P	173.056	P	289.693	P	244.332	P	380.868	P	266.104	P	298.747	P	310.832	P	177.418	P	197.427	P	197.966	A	94.1035	A	104.971	A	129.655	P	130.273	P	184.082	P	160.469	LOC_Os12g39620.2	disease resistance protein, putative, expressed
Os004249_01	A	84.8312	A	56.6861	A	45.7377	P	172.376	P	271.447	P	324.534	P	330.034	P	334.983	P	502.185	A	61.4722	A	51.0026	A	50.0154	A	53.4362	P	208.04	P	147.789	P	161.417	P	223.299	P	236.952	LOC_Os11g47140.1	OsWAK123 - OsWAK receptor-like protein kinase, expressed
Os004255_01	A	69.623	A	56.7733	A	47.7341	P	156.414	P	142.888	P	143.705	A	87.1502	P	139.64	A	122.215	A	57.947	A	72.8121	A	71.8042	A	31.2303	A	31.0353	A	19.5243	A	60.7852	A	76.5398	A	93.5759	LOC_Os03g10820.1	expressed protein
Os004256_01	A	91.3882	A	58.4712	A	68.9549	A	145.608	A	125.467	A	97.429	A	58.4704	A	96.5343	P	127.401	A	49.2966	A	39.0324	A	44.945	A	13.8409	A	21.0622	A	15.9932	A	72.3175	A	68.2943	A	60.809	LOC_Os08g43250.1	MATE efflux family protein, putative, expressed
Os004265_01	P	357.628	P	223.305	A	97.4952	P	193.332	P	197.27	P	168.715	P	342.623	P	255.443	P	169.572	A	44.881	A	83.7541	A	81.1873	A	35.0614	A	37.1297	A	47.862	A	94.2922	A	91.4423	A	81.5136	LOC_Os09g31380.1	jmjC domain-containing protein 5, putative
Os004268_01	A	41.0201	A	36.3869	A	48.9405	A	148.352	A	121.607	A	80.5126	A	48.516	A	90.8188	A	136.922	A	43.4194	A	42.3316	A	52.7113	A	43.5671	A	26.8354	A	-8.50833	A	67.2053	A	78.8664	A	70.0362	LOC_Os02g05730.1	protein kinase domain containing protein, expressed
Os004274_01	P	279.685	P	263.602	A	124.756	A	120.028	A	136.228	A	113.188	A	284.041	A	270.028	P	340.011	A	41.6834	A	30.3972	A	38.6532	A	44.6396	A	27.2019	A	-4.23154	A	59.1362	A	75.5356	A	59.8341	LOC_Os09g12420.1	transposon protein, putative, unclassified, expressed
Os004287_01	A	56.8964	A	67.8097	A	65.5727	P	434.2	P	329.662	P	230.095	P	199.586	P	478.791	P	508.519	P	182.286	P	212.922	P	345.669	A	124.995	P	185.346	P	188.943	P	113.508	P	228.281	P	270.357	LOC_Os03g28140.1	1-phosphatidylinositol-4-phosphate 5-kinase/ zinc ion binding protein, putative, expressed
Os004292_01	A	61.0254	A	47.4374	A	56.5545	P	187.934	P	172.398	P	144.477	A	105.824	A	107.605	A	146.982	A	41.2431	A	48.6913	A	71.3552	A	-1.88074	A	7.3733	A	16.8889	A	79.9607	A	78.4988	A	83.5953	LOC_Os02g49460.1	auxin-independent growth promoter protein, putative, expressed
Os004293_01	A	118.721	A	66.3539	A	78.6468	P	195.711	A	113.547	A	79.2218	A	130.217	A	164.717	P	217.675	A	54.1885	A	47.1521	A	52.0276	A	48.1655	A	32.6789	A	13.6047	A	68.2709	A	71.5277	A	59.1339	LOC_Os03g28270.1	Leucine Rich Repeat family protein, expressed
Os004298_01	P	1113.39	P	861.918	P	368.171	P	1614.74	P	1091.54	P	977.837	P	922.082	P	1168.26	P	930.586	P	353.352	P	467.91	P	623.568	P	479.549	P	442.352	P	453.436	P	865.539	P	676.585	P	478.334	LOC_Os06g51260.1	MYB family transcription factor, putative, expressed
Os004301_01	P	186.675	P	226.019	P	223.786	P	1635.07	P	2149.94	P	2930.19	P	1946.32	P	1791.04	P	994.052	P	2136.87	P	3128.95	P	4889.67	P	3258.22	P	2525.18	P	1767.64	P	1556.94	P	1019.83	P	1313.8	LOC_Os05g07870.1	triose phosphate/phosphate translocator, non-green plastid,chloroplast precursor, putative, expressed
Os004313_01	A	145.052	A	93.4486	A	96.5215	P	183.243	P	161.231	P	143.947	A	196.219	P	288.931	P	279.252	A	68.8497	A	67.7215	A	85.3377	A	42.6607	A	44.7927	A	19.4142	A	80.3792	A	81.697	A	98.6122	LOC_Os10g25550.1	tyrosine protein kinase domain containing protein, putative, expressed
Os004316_01	P	158.813	A	318.64	A	85.6655	P	815.378	P	515.794	P	613.603	P	221.596	P	219.733	P	388.6	P	250.669	P	261.341	P	413.897	P	297.865	P	257.091	P	186.046	P	263.129	P	197.846	P	186.201	LOC_Os03g62510.1	amine oxidase, flavin-containing, domain containing protein, expressed
Os004318_01	P	301.073	P	236.964	A	129.808	P	218.954	P	197.098	P	166.683	A	170.405	P	241.814	P	302.227	A	91.7906	A	92.4594	A	97.3305	A	61.0916	A	118.518	A	115.935	A	94.9053	P	125.309	A	116.025	LOC_Os12g09660.2	expressed protein
Os004323_01	P	166.73	A	127.233	A	101.459	P	189.031	P	140.622	A	105.719	A	466.174	P	190.359	A	138.614	A	72.1819	A	98.8939	A	114.72	A	27.0332	A	53.9248	A	43.7008	A	90.6633	A	97.7812	A	122.285	LOC_Os08g04770.1	AMP-binding domain containing protein, expressed
Os004328_01	P	845.864	P	659.33	P	490.858	P	1502.34	P	1294.48	P	1233.81	P	1201.72	P	962.284	P	900.621	P	1030.47	P	1010.96	P	1027.37	P	2178.99	P	1562.97	P	1078.33	P	1431.36	P	1024.23	P	787.309	LOC_Os12g06280.1	expressed protein
Os004342_01	P	221.134	P	236.238	P	208.519	P	352.933	P	340.123	P	333.164	P	443.355	P	427.298	P	369.976	P	392.383	P	342.554	P	393.832	P	172.842	P	183.017	A	167.614	P	191.546	P	187.538	P	170.849	-	-
Os004343_01	A	66.732	A	66.967	A	57.5558	P	284.134	P	251.999	P	180.509	P	200.992	P	184.338	P	186.379	P	133.857	P	165.645	P	160.985	P	215.976	P	166.164	A	75.018	A	122.891	P	125.19	P	146.752	LOC_Os06g14030.1	potassium channel SKOR, putative, expressed
Os004345_01	P	279.58	P	254.69	A	95.4232	P	247.493	P	296.979	P	275.684	P	170.27	P	178.491	P	188.62	A	42.8761	A	64.8143	A	85.4546	A	15.6899	A	29.38	A	17.9617	A	89.957	A	80.5235	A	83.2055	-	-
Os004351_01	A	61.4681	A	46.2824	A	50.5132	P	323.736	P	296.374	P	264.67	P	223.491	P	147.25	A	484.821	P	184.574	P	181.887	P	174.646	P	239.618	A	109.426	A	89.3206	P	191.981	P	208.375	P	186.855	LOC_Os09g29239.3	purine permease, putative, expressed
Os004364_01	A	55.3446	A	47.5422	A	53.3275	P	140.308	A	119.293	A	78.5337	A	78.1836	A	106.447	A	123.21	A	46.303	A	43.5075	A	50.9002	A	18.8702	A	19.9748	A	5.39293	A	59.6924	A	69.4572	A	68.7677	LOC_Os01g60900.1	expressed protein
Os004367_01	A	71.0325	A	40.6709	A	66.2186	A	106.838	A	98.6883	A	83.6314	A	36.1914	A	83.7503	P	165.582	A	22.7239	A	30.4804	A	38.8812	A	8.53674	A	4.79969	A	-0.0437364	A	42.2654	A	52.3307	A	45.9517	LOC_Os10g42760.1	PPR repeat domain containing protein, putative, expressed
Os004368_01	P	138.333	P	141.838	A	91.2313	P	738.806	P	692.03	P	589.825	P	411.41	P	527.395	P	604.516	P	298.633	P	449.48	P	474.365	P	294.091	P	229.3	P	244.196	P	375.97	P	361.24	P	346.048	LOC_Os07g31280.3	casein kinase II subunit beta-4, putative, expressed
Os004372_01	P	162.103	P	238.688	P	210.845	P	316.661	P	410.421	P	430.476	P	457.41	P	475.729	P	291.06	P	131.763	P	198.427	P	219.687	A	89.7822	A	88.0705	P	138.607	P	199.341	P	134.334	P	133.671	LOC_Os07g43740.1	zinc finger, C3HC4 type domain containing protein, expressed
Os004380_01	P	245.126	P	209.327	A	110.821	P	145.484	P	132.798	P	124.576	A	287.048	P	371.195	P	338.174	A	68.1266	A	79.0502	A	91.8339	A	38.2693	A	36.1332	A	26.3536	A	78.1193	P	139.235	A	112.553	LOC_Os08g06460.1	dnaJ domain containing protein, expressed
Os004382_01	P	173.745	P	145.205	A	166.676	P	200.564	P	153.348	P	141.77	A	125.415	A	136.246	A	141.643	A	79.7137	A	87.1328	A	94.8576	A	76.6542	A	66.4532	A	21.3223	A	93.8356	A	91.4106	A	90.4556	LOC_Os02g26160.2	receptor lectin kinase like protein, putative, expressed
Os004399_01	P	119.983	A	95.5092	A	61.5872	P	2437.6	P	2172.72	P	205.969	A	88.6156	P	535.15	P	1230.26	P	3960.85	P	1675.6	A	47.3399	P	6016.1	P	2143.77	A	35.8451	A	62.9934	P	660.314	P	1889.8	LOC_Os02g40180.1	receptor-like protein kinase 5 precursor, putative, expressed
Os004400_01	A	61.2441	A	54.1129	A	56.2511	P	195.669	P	175.938	P	134.644	A	137.669	P	192.852	P	134.244	A	55.1621	A	64.9994	A	60.9954	A	45.7825	A	41.142	A	34.1695	A	92.8752	A	80.6621	A	69.3022	LOC_Os11g31480.1	ATP binding protein, putative, expressed
Os004406_01	P	404.521	P	150.131	P	357.527	P	537.945	P	321.379	P	358.7	P	235.132	P	330.322	P	442.558	P	1290.22	P	541.061	P	905.519	P	1078.53	P	505.285	P	254.943	P	522.635	P	953.576	P	1392.56	LOC_Os09g28390.1	cytochrome P450, putative, expressed
Os004407_01	P	375.958	P	367.3	A	352.769	P	640.962	P	722.392	P	729.598	P	430.653	P	429.428	P	533.831	P	290.288	P	327.486	P	431.94	P	336.077	P	296.4	P	226.647	P	267.634	P	271.004	P	321.35	LOC_Os01g10600.1	aquaporin protein, putative, expressed
Os004414_01	A	52.848	A	61.128	A	95.6182	A	125.111	A	102.256	A	65.3722	A	56.2384	A	75.4589	P	191.226	A	29.9731	A	40.9767	A	49.1223	A	-6.02948	A	-1.4771	A	0.578184	A	47.6176	A	63.8181	A	53.344	LOC_Os11g24530.1	pentatricopeptide, putative, expressed
Os004418_01	A	70.6929	A	64.8295	A	66.4906	A	130.208	A	130.198	A	88.6767	A	77.2314	A	114.347	P	183.368	A	24.1778	A	32.0936	A	46.2447	A	-3.51265	A	3.84814	A	1.0227	A	50.5289	A	55.2267	A	47.4469	LOC_Os04g58960.1	regulator of chromosome condensation, putative, expressed
Os004422_01	A	66.2435	A	59.4669	A	43.7232	A	131.486	P	131.393	A	102.828	A	56.442	A	85.2059	A	125.94	A	32.9474	A	38.2002	A	56.6139	A	3.45397	A	3.46486	A	8.86058	A	62.3399	A	77.4109	A	68.4854	LOC_Os03g12270.1	dehydrogenase, putative, expressed
Os004436_02	A	85.4418	P	136.542	P	171.69	P	186.575	P	140.602	A	106.515	A	87.6549	P	143.179	P	162.633	A	120.831	P	121.839	P	129.341	A	95.8253	A	81.7781	A	60.6728	P	136.431	P	141.366	A	124.953	LOC_Os04g42174.2	expressed protein
Os004447_01	A	54.1635	A	48.0891	A	65.3628	A	208.469	P	280.029	P	215.347	P	234.665	P	184.949	P	348.798	A	66.9641	A	91.1671	A	100.355	A	32.9384	A	53.6174	A	47.9589	A	125.67	P	145.439	P	125.131	LOC_Os06g09570.1	nucleolar GTP-binding protein 1, putative, expressed
Os004450_01	P	444.519	P	409.422	A	120.051	P	216.102	P	185.883	A	88.6684	A	128.648	P	344.024	P	229.563	A	79.9418	A	59.2382	A	56.651	A	-0.734597	A	3.09705	A	2.45887	A	66.9065	A	75.4503	A	66.2474	LOC_Os03g12730.1	receptor protein kinase CLAVATA1 precursor, putative, expressed
Os004455_01	A	76.2625	A	56.0264	A	53.4461	P	236.602	P	205.836	P	199.674	A	157.78	P	247.288	P	300.697	A	117.334	P	140.16	A	144.527	A	86.3953	A	102.316	P	156.502	P	138.285	P	171.122	P	167.016	LOC_Os12g06810.1	WD domain, G-beta repeat domain containing protein, expressed
Os004459_01	P	202.035	P	168.207	P	156.494	P	230.286	P	239.205	P	273.592	A	99.8432	P	135.547	P	144.232	A	50.6561	A	55.2351	A	44.9142	A	25.0918	A	35.8351	A	21.3398	A	87.4476	A	92.6783	P	113.93	LOC_Os03g19920.1	expressed protein
Os004461_02	P	357.376	P	339.033	P	304.825	P	493.622	P	414.144	P	314.921	P	220.518	P	283.783	P	381.138	P	390.606	P	358.891	P	323.847	P	404.046	P	326.597	P	247.807	P	273.102	P	251.075	P	271.252	-	-
Os004463_01	P	108.49	A	71.2979	A	61.4131	P	204.993	P	171.602	P	140.288	P	190.756	P	200.448	P	208.579	A	58.4776	A	105.67	A	106.332	A	38.6148	A	41.1527	A	35.8138	A	79.0008	A	114.074	P	139.684	-	-
Os004469_01	A	55.0146	A	41.34	A	39.6197	A	151.201	P	152.658	A	107.228	A	68.8726	A	115.258	A	131.548	A	43.024	A	41.8665	A	53.3906	A	-0.692426	A	5.86741	A	3.44627	A	60.7451	A	63.1053	A	80.2045	LOC_Os07g27310.1	CRAL/TRIO domain containing protein, expressed
Os004470_01	A	61.4237	A	38.2358	A	65.9958	P	223.64	P	191.339	P	147.822	P	155.677	P	193.008	P	269.177	A	58.1677	A	63.8979	A	74.5347	A	10.6267	A	23.7044	A	46.1173	P	127.654	A	98.6309	A	78.0636	LOC_Os07g43980.1	DEAD-box ATP-dependent RNA helicase, putative, expressed
Os004476_01	A	65.2514	A	83.6565	A	66.2421	P	183.443	P	161.666	P	127.855	A	93.1464	P	119.096	A	141.206	A	80.8483	A	77.2766	A	84.1644	A	57.1997	A	53.7257	A	37.5359	A	114.268	A	104.594	A	114.335	LOC_Os09g32860.1	OsFBX335 - F-box domain containing protein, expressed
Os004484_01	P	251.491	P	196.208	P	170.462	P	158.593	P	157.464	P	110.691	A	224.655	P	372.695	P	280.015	A	47.599	A	60.3274	A	77.3869	A	0.383876	A	42.2205	A	33.3123	A	79.5937	A	79.0091	A	85.0389	LOC_Os11g41970.1	hypothetical protein
Os004485_01	P	244.516	P	224.388	A	172.853	A	211.545	P	251.97	A	103.636	A	159.284	A	153.858	A	948.75	A	43.2371	A	46.1591	A	52.0934	A	21.0334	A	11.5197	A	-3.63459	A	66.0057	A	87.335	A	79.8038	-	-
Os004487_01	P	2553.38	P	1796.21	P	950.668	P	790.688	P	1165.22	P	953.784	P	1430.14	P	1106.23	P	1303.64	P	644.425	P	710.974	P	723.111	P	1019.23	P	777.55	P	841.323	P	451.381	P	603.071	P	840.436	LOC_Os02g48570.1	peptide transporter PTR2, putative, expressed
Os004498_01	P	304.948	P	306.867	A	133.277	P	317.078	P	360.229	P	352.897	P	200.81	P	186.72	P	229.042	A	72.9661	A	89.2363	A	79.9297	A	45.9704	A	48.6103	A	25.1418	A	81.4197	A	95.9907	A	97.096	LOC_Os03g54970.1	expressed protein
Os004503_01	A	66.9985	A	47.3761	A	82.3973	P	170.755	P	172.44	P	151.078	A	86.5339	A	81.5072	A	90.6967	A	71.8058	A	70.8007	A	77.0961	A	87.7675	A	105.03	A	89.1541	A	75.9296	A	88.7796	A	87.679	LOC_Os03g27350.3	cysteine protease ATG4, putative, expressed
Os004509_01	P	5599.93	P	5424.48	P	5546.22	P	12038.4	P	13315.1	P	13002.1	P	13486.7	P	11057.7	P	9213.42	P	11913.9	P	13643.3	P	14463.4	P	10323.1	P	10004.9	P	10794.8	P	10819.2	P	10714.4	P	8940.24	LOC_Os02g53280.1	expressed protein
Os004517_01	A	78.9077	A	68.2861	A	58.9532	P	213.217	A	139.055	A	84.43	A	66.0007	P	146.638	A	141.375	A	23.8905	A	26.4736	A	47.1599	A	15.5591	A	7.90518	A	10.0309	A	57.449	A	59.8267	A	56.0544	LOC_Os05g45340.1	ATP binding protein, putative, expressed
Os004519_01	A	110.978	A	64.7372	A	47.8346	P	235.252	P	205.909	P	193.524	P	139.027	P	190.178	P	228.086	A	83.79	A	96.5484	A	98.7207	A	23.9388	A	60.2183	A	88.049	A	85.0664	A	88.3566	A	107.046	LOC_Os10g42510.1	expressed protein
Os004524_01	A	43.6442	A	24.9489	A	33.9236	P	222.691	P	175.989	P	174.05	P	163.6	P	158.657	P	197.196	P	123.64	P	140.233	A	132.57	A	36.7281	A	52.333	A	45.8021	A	75.3055	A	83.2595	A	76.3862	LOC_Os12g18120.4	zinc finger C-x8-C-x5-C-x3-H type family protein, expressed
Os004528_01	P	210.765	P	259.592	P	251.668	P	256.762	P	223.424	P	171.31	P	190.35	P	208.274	P	228.355	P	152.442	P	150.368	P	204.304	P	122.601	P	138.801	P	128.959	P	181.439	P	150.715	P	185.357	LOC_Os06g29800.1	pentatricopeptide, putative, expressed
Os004529_01	P	107.68	A	84.0738	A	79.3564	P	399.414	P	605.541	P	997.906	P	323.929	P	335.722	P	348.474	A	68.7371	A	82.6335	A	85.147	A	44.9679	A	40.6766	A	29.2316	A	89.6524	A	95.3074	A	94.889	LOC_Os05g04350.1	retrotransposon protein, putative, unclassified
Os004531_01	A	69.1527	A	39.0863	A	42.3435	A	122.251	A	113.367	A	83.4957	A	59.3762	A	87.9075	A	125.107	A	40.68	A	53.3562	A	74.8	A	9.61127	A	14.355	A	9.53636	A	62.6278	A	60.2237	A	67.6683	LOC_Os10g40920.1	pentatricopeptide, putative, expressed
Os004535_01	P	184.286	A	110.77	A	95.1731	P	223.139	P	224.676	P	198.735	P	189.691	P	206.711	P	313.037	A	100.849	A	94.2315	A	103.138	A	61.8504	A	45.1391	A	26.2217	A	88.567	A	88.5012	A	79.6831	LOC_Os07g48970.2	OsPOP17 - Putative Prolyl Oligopeptidase homologue, expressed
Os004540_01	A	56.5312	A	43.6375	A	50.6196	A	141.86	A	114.991	A	90.9583	A	57.7533	A	105.604	P	142.21	A	41.8218	A	57.674	A	50.9899	A	10.0207	A	5.36673	A	3.85275	A	67.0773	A	65.1593	A	65.0904	LOC_Os03g55890.1	ternary complex factor MIP1, putative, expressed
Os004542_02	A	56.6501	A	56.7783	A	52.2681	P	237.68	P	170.827	P	191.306	A	71.7381	P	175.465	A	156.704	A	88.0023	A	91.8712	P	127.687	A	34.0265	A	62.4608	A	100.97	A	78.6458	A	93.9861	A	101.41	-	-
Os004543_01	P	149.749	P	167.577	P	171.943	P	318.12	P	357.918	P	290.577	P	148.587	P	179.898	P	243.023	P	198.741	P	214.507	P	217.31	P	227.318	P	213.301	P	224.937	P	209.653	P	211.102	P	295.986	LOC_Os03g49200.2	WD domain, G-beta repeat domain containing protein, expressed
Os004544_01	A	69.0796	A	40.2032	A	47.9495	P	341.859	P	320.992	P	413.429	P	117.079	P	161.739	P	185.993	A	122.178	P	200.479	P	215.489	P	123.972	P	160.456	A	189.037	P	198.978	P	192.017	A	113.117	LOC_Os02g10130.1	tubulin binding cofactor C, putative, expressed
Os004545_01	A	51.9764	A	38.6906	A	54.1616	A	133.882	A	112.801	A	86.3774	A	49.0412	A	87.5833	A	137.949	A	39.1004	A	42.4281	A	46.4263	A	5.26237	A	2.13637	A	1.5472	A	51.1957	A	65.1035	A	63.6274	-	-
Os004548_01	P	156.61	P	144.796	P	133.779	P	434.765	P	383.224	P	400.665	P	185.341	P	197.126	P	248.796	P	200.671	P	223.402	P	297.565	P	126.388	P	172.241	P	285.848	P	161.501	P	199.178	P	248.945	-	-
Os004552_01	A	109.94	A	65.9762	A	50.9474	A	139.908	A	107.433	A	73.6065	A	99.7052	P	149.057	P	171.548	A	44.5203	A	47.2723	A	57.0891	A	-0.0058998	A	9.28255	A	3.99665	A	53.9255	A	74.6118	A	80.5733	-	-
Os004563_02	A	32.2882	A	20.9081	A	31.8789	A	139.991	A	137.885	A	68.7467	A	62.1104	A	78.278	A	104.08	A	46.2243	A	37.1456	A	56.7145	A	-2.32398	A	7.80175	A	14.6712	A	76.7384	A	77.9985	A	54.3494	-	-
Os004583_01	A	57.1225	A	48.1804	A	43.2919	A	127.642	A	103.013	A	104.223	A	48.1852	A	85.2634	A	126.626	A	32.2731	A	37.4508	A	46.3121	A	8.47799	A	12.8817	A	14.4963	A	53.5101	A	66.9297	A	50.9063	-	-
Os004585_01	A	45.5765	A	43.1735	A	42.593	P	167.246	A	121.451	A	88.8183	A	71.7173	A	114.587	A	142.874	A	63.1348	A	48.4405	A	61.0371	A	26.04	A	33.1849	A	24.8638	A	81.2942	A	77.0671	A	88.2965	-	-
Os004591_01	A	111.344	P	129.39	P	141.674	P	191.994	P	221.375	P	146.332	A	69.4126	A	125.765	P	176.753	A	85.3397	A	99.7021	P	101.014	A	89.6031	A	73.4293	A	56.7933	P	129.83	P	111.045	A	129.679	LOC_Os09g04339.1	expressed protein
Os004597_01	A	119.402	A	89.0561	A	51.5057	P	152.675	P	148.802	P	135.699	A	90.2174	P	197.288	P	291.316	A	72.356	A	80.557	A	85.904	A	33.4838	A	60.6026	A	65.0712	A	63.9925	A	99.207	P	149.155	LOC_Os02g38220.1	eukaryotic translation initiation factor 4B, putative, expressed
Os004603_02	A	50.0936	A	40.7279	A	55.9723	A	142.563	A	112.446	A	66.877	A	30.6498	A	71.5451	P	222.352	A	39.2498	A	39.6287	A	48.1247	A	8.09579	A	5.90438	A	-2.18078	A	52.9432	A	64.7944	A	48.1474	-	-
Os004605_01	P	864.767	P	626.763	P	215.832	P	247.653	P	218.205	P	204.276	P	636.538	P	640.364	P	779.141	P	183.916	P	233.429	P	275.079	P	156.273	P	182.271	A	127.52	P	276.006	P	231.856	P	228.764	LOC_Os01g42730.1	GDSL-like lipase/acylhydrolase, putative, expressed
Os004626_02	P	9781.51	P	9460.48	P	6077.05	P	5532.88	P	5203.68	P	4873.43	P	6073.98	P	5390.62	P	4812.05	P	7347.59	P	7347.36	P	7726.84	P	5988.62	P	5769.26	P	5731.4	P	6349.41	P	6379.01	P	5752.61	-	-
Os004628_01	P	997.306	P	651.559	P	407.284	P	185.489	P	165.265	P	141.86	A	852.391	P	679.621	P	495.264	A	44.5682	A	52.4336	A	72.6779	A	7.45329	A	22.5286	A	19.429	A	66.6846	A	73.435	A	65.5854	LOC_Os02g26600.1	ATP binding, related, putative, expressed
Os004630_01	P	147.479	A	87.8378	A	88.2779	P	323.381	P	190.202	P	211.949	P	187.138	P	253.99	P	345.122	P	174.997	P	159.651	P	296.108	P	198.617	P	175.61	P	155.311	P	215.469	P	252.854	P	456.057	LOC_Os01g66830.1	pectinacetylesterase domain containing protein, expressed
Os004632_01	P	681.878	P	478.773	P	220.681	P	195.755	P	208.17	P	174.464	P	284.42	P	339.864	P	406.816	A	95.4474	A	92.1818	A	101.897	A	55.833	A	53.6985	A	29.521	A	106.057	A	103.374	A	113.339	LOC_Os07g25460.1	ankyrin repeat domain containing protein, expressed
Os004647_01	P	338.58	P	289.48	P	167.08	P	418.389	P	422.364	P	323.456	P	306.282	P	281.983	P	282.274	P	177.952	P	219.603	P	207.228	P	364.441	P	312.778	P	164.617	P	218.546	P	216.03	P	199.041	LOC_Os04g38920.1	DUF593 domain containing protein, expressed
Os004651_01	P	131.925	P	125.087	A	109.56	P	196.873	P	176.149	P	152.854	P	147.082	P	193.122	P	228.725	A	83.7107	A	86.5131	A	97.3001	A	28.4834	A	40.7035	A	29.7831	A	75.2847	A	67.65	A	68.5176	LOC_Os02g32380.1	hypothetical protein
Os004655_02	A	129.162	A	74.0031	A	63.3918	P	159.987	P	149.754	P	131.153	A	95.3772	A	133.365	P	204.306	A	56.1898	A	63.3975	A	70.4982	A	16.9417	A	19.1347	A	12.3722	A	65.9061	A	71.4336	A	64.4796	-	-
Os004656_01	A	48.0314	A	30.1048	A	40.7303	A	134.623	A	113.774	A	91.4069	A	152.117	A	113.383	A	142.562	A	38.563	A	33.1308	A	32.3414	A	6.18908	A	0.859612	A	-2.95625	A	44.4176	A	67.2822	A	62.2356	LOC_Os01g68870.2	leucine-rich repeat receptor protein kinase EXS precursor, putative, expressed
Os004657_01	A	49.7512	A	34.8528	A	54.0884	P	155.557	P	148.265	A	103.822	A	54.9662	A	101.384	A	161.921	A	51.0606	A	53.1957	A	58.8441	A	15.5109	A	39.2577	A	49.6911	A	70.8854	A	73.4409	A	60.5726	LOC_Os01g67340.3	STRUBBELIG-RECEPTOR FAMILY 8 precursor, putative, expressed
Os004659_02	P	260.85	P	281.242	P	170.544	P	463.782	P	547.562	P	531.474	P	344.502	P	357.253	P	297.818	P	200.335	P	165.258	P	151.372	A	71.2029	A	69.8273	A	70.0078	P	119.581	P	125.85	P	190.034	-	-
Os004660_01	A	94.41	A	81.1443	A	74.141	P	252.154	P	224.825	P	198.481	P	372.779	P	329.292	P	296.635	P	128.836	A	98.0692	A	126.74	A	73.1499	A	61.5672	A	46.3211	A	85.9775	A	124.302	P	133.187	LOC_Os12g09570.2	GTP binding protein, putative, expressed
Os004662_01	A	90.0818	A	99.3741	A	126.866	P	159.181	P	162.654	P	125.979	A	85.7362	A	123.16	P	195.58	A	50.5651	A	59.0896	A	66.4343	A	54.0897	A	59.7004	A	64.6167	A	95.8319	A	95.8903	A	90.4471	LOC_Os06g36680.1	homeobox domain containing protein, expressed
Os004664_01	A	78.0174	A	70.0899	A	48.3354	A	136.468	A	113.3	A	84.5759	A	48.5916	A	97.2522	A	123.126	A	39.249	A	44.5334	A	45.6002	A	-2.1251	A	4.66833	A	6.67882	A	57.5123	A	65.7549	A	52.8047	LOC_Os01g42070.1	kinesin motor domain containing protein, putative, expressed
Os004668_01	A	73.1277	A	64.9565	A	54.4559	A	148.168	P	238.725	A	105.618	A	411.016	P	670.719	P	540.969	A	25.309	A	36.3306	A	52.4877	A	4.94887	A	10.2864	A	9.24034	A	48.3543	A	65.0748	A	53.8823	-	-
Os004669_01	P	122.571	A	81.1109	A	53.5738	P	191.789	P	169.08	P	152.385	A	194.241	P	171.79	A	140.269	A	41.9106	A	58.1006	A	68.0522	A	12.1047	A	18.0779	A	19.0878	A	61.5802	A	71.9036	A	63.8199	LOC_Os01g68104.1	ZOS1-21 - C2H2 zinc finger protein, expressed
Os004670_01	A	70.8005	A	54.8515	A	64.2008	P	121.456	P	141.028	P	138.544	P	115.906	A	118.285	P	154.59	A	59.2911	A	74.1551	A	81.8608	A	45.4013	A	32.4163	A	15.1333	P	139.078	A	118.32	A	73.6328	LOC_Os09g19940.1	cwfJ-like family protein, putative, expressed
Os004674_01	A	57.5749	A	49.8669	A	52.706	P	171.897	P	160.289	P	121.092	P	250.332	A	111.77	A	146.828	A	34.5849	A	40.5233	A	51.5441	A	4.12733	A	6.71608	A	10.9774	A	81.6633	A	70.1637	A	56.9334	LOC_Os12g13340.2	expressed protein
Os004678_01	A	33.4303	A	31.0301	A	47.3317	A	162.068	P	172.608	A	99.8013	A	70.4456	A	96.0201	P	197.147	A	53.6815	A	49.9286	A	51.6777	A	2.86888	A	14.4513	A	-0.359454	A	55.583	A	76.5897	A	56.2055	LOC_Os05g05300.1	CRS1/YhbY domain containing protein, putative, expressed
Os004683_01	P	108.255	A	108.732	A	83.7706	P	235.003	P	170.858	A	134.412	A	79.1435	A	136.776	P	179.499	A	67.2716	A	83.3781	A	162.74	A	19.9719	A	29.263	A	30.0036	A	69.3415	P	103.143	A	114.449	LOC_Os11g14130.1	mTERF family protein, expressed
Os004687_01	A	69.4803	A	63.1716	A	59.0605	P	260.89	P	160.752	A	103.602	A	62.156	A	104.211	A	161.911	A	37.917	A	56.8736	A	48.7873	A	7.59815	A	18.6932	A	23.2592	A	71.9929	A	80.5	A	90.214	-	-
Os004692_01	P	193.175	P	213.124	P	185.186	P	399.773	P	341.37	P	241.089	P	239.907	P	206.901	P	330.692	P	251.373	P	225.561	P	252.14	P	645.772	P	524.801	P	259.599	P	283.994	P	209.243	P	302.931	-	-
Os004700_01	P	519.675	P	558.053	P	381.753	P	874.05	P	994.659	P	623.989	P	266.543	P	336.203	P	389.809	P	824.854	P	732.465	P	725.122	P	675.408	P	566.805	P	405.473	P	598.104	P	667.896	P	603.245	LOC_Os01g18620.1	transferase family protein, putative
Os004701_02	A	64.4699	A	41.0959	A	46.6206	A	125.532	A	110.365	A	91.2693	A	34.6783	A	92.6066	A	130.699	A	46.4911	A	42.8481	A	56.2231	A	8.75445	A	10.6838	A	-3.30923	A	50.6572	A	69.0348	A	70.6703	-	-
Os004707_01	A	81.2238	A	46.443	A	47.5728	P	143.865	A	120.398	A	98.3184	A	70.4784	A	106.796	A	121.593	A	46.8579	A	45.8407	A	50.297	A	14.9471	A	8.70468	A	-4.1567	A	59.2526	A	68.7114	A	71.6495	LOC_Os02g55310.1	pentatricopeptide, putative, expressed
Os004718_01	A	51.8662	A	45.7819	A	44.6757	A	136.503	A	107.006	A	74.7445	A	56.8783	A	81.4151	A	116.681	A	26.6036	A	40.6662	A	53.8668	A	-5.42985	A	-7.52829	A	-11.5002	A	55.5978	A	59.4306	A	54.5179	LOC_Os09g30070.1	expressed protein
Os004720_01	A	47.3151	A	48.7642	A	70.5095	P	247.567	P	202.662	P	203.984	A	130.238	P	215.565	P	245.901	A	77.7933	P	233.608	P	238.286	A	77.0014	A	86.1278	A	115.295	P	133.015	P	131.05	A	82.6524	LOC_Os05g29050.1	phospholipase D p1, putative, expressed
Os004721_01	P	232.667	P	301.263	P	379.827	P	387.648	P	397.235	P	357.592	P	313.462	P	362.206	P	564.79	P	255.334	P	308.32	P	377.235	P	228.913	P	275.414	P	313.783	P	360.028	P	405.741	P	350.732	-	-
Os004723_01	P	350.051	P	328.391	P	300.543	P	336.327	P	350.409	P	248.938	P	178.765	P	249.13	P	268.383	A	104.296	A	100.125	A	102.146	A	74.4569	A	69.7985	A	40.3008	P	120.471	A	119.06	P	129.225	LOC_Os04g35270.1	alpha-1,4-fucosyltransferase, putative, expressed
Os004735_01	A	57.231	A	46.3837	A	48.3336	P	240.25	P	217.811	P	263.598	P	237.585	P	273.896	P	234.695	P	227.27	P	276.362	P	382.85	P	168.822	A	87.3246	A	69.4195	A	146.04	A	114.062	A	102.301	LOC_Os06g43120.1	zinc finger C-x8-C-x5-C-x3-H type family protein, expressed
Os004740_01	A	95.8547	A	93.6994	P	148.754	P	554.402	P	419.736	P	467.006	P	428.905	P	474.876	P	453.559	P	274.786	P	305.569	P	474.865	P	298.724	P	212.231	P	180.587	P	529.069	P	437.622	P	516.189	LOC_Os05g34854.1	gibberellin 20 oxidase 2, putative, expressed
Os004741_01	P	220.523	P	174.231	A	105.61	P	150.319	P	160.514	A	115.512	A	133.456	P	241.261	P	241.457	A	44.7588	A	51.3718	A	63.3224	A	7.18408	A	15.4045	A	10.0794	A	52.3627	A	68.4613	A	54.9767	LOC_Os06g49350.1	retrotransposon protein, putative, unclassified, expressed
Os004746_02	P	129.819	A	129.779	A	80.1583	P	205.58	P	279.513	P	269.415	P	288.615	P	208.877	P	238.308	P	131.274	P	145.11	P	170.785	A	40.5285	A	41.7206	A	14.775	A	66.0631	A	83.6284	A	86.1427	-	-
Os004748_01	A	118.398	A	184.492	A	87.945	P	267.787	P	230.346	P	148.956	A	72.8382	A	122.936	P	261.152	A	87.3495	A	95.2696	A	72.2857	P	115.882	A	77.1776	A	37.7728	A	44.0092	A	100.312	P	159.506	LOC_Os02g32900.1	expressed protein
Os004755_01	P	9222.6	P	8693.32	P	9815.75	P	18331.2	P	20867.4	P	19923.7	P	14859.7	P	15389.6	P	17500.7	P	25367.7	P	25199.6	P	24852.6	P	17889.3	P	18215.5	P	17522.5	P	22961.8	P	22726.6	P	24229	LOC_Os06g46440.1	expressed protein
Os004759_01	A	40.3718	A	41.0617	A	55.8875	A	133.092	A	107.63	A	72.7058	A	57.1785	A	99.8969	A	150.382	A	28.1723	A	37.0467	A	48.9602	A	-2.60637	A	12.6035	A	49.7971	A	44.5708	A	51.0694	A	47.9357	LOC_Os02g42910.1	expressed protein
Os004761_01	A	32.3672	A	30.7932	A	24.6367	A	148.467	A	118.37	A	74.6801	A	51.6791	A	86.5603	A	106.486	A	62.1273	A	59.3885	A	59.8984	A	6.94604	A	-0.565698	A	-5.24609	A	53.859	A	72.1977	A	57.9683	LOC_Os04g18030.3	Sec1 family transport protein, putative, expressed
Os004765_02	A	82.1719	A	93.7077	A	55.7731	A	130.145	A	83.894	A	61.5133	A	23.1566	A	65.1253	A	126.979	A	35.7949	A	43.0394	A	48.0049	A	5.33744	A	6.92616	A	6.72306	A	51.4876	A	71.4988	A	64.3151	-	-
Os004771_01	A	87.9664	A	96.6938	P	105.886	P	345.861	P	342.179	P	267.727	P	217.039	P	254.671	P	249.983	P	168.172	P	188.963	P	199.671	A	112.535	A	104.605	A	94.6009	P	172.22	P	193.738	P	191.499	LOC_Os05g34110.1	homeodomain-related, putative, expressed
Os004779_01	P	739.557	P	564.276	P	354.77	P	259.282	P	262.343	P	247.528	P	429.449	P	412.364	P	454.74	A	87.4398	A	107.26	P	131.512	A	81.1878	A	67.6106	A	42.9396	A	95.6783	A	96.2852	A	83.3154	-	-
Os004780_01	A	67.9902	A	53.2763	A	52.0489	P	218.989	P	219.106	P	195.374	P	168.853	A	111.712	P	243.842	A	64.4693	A	93.5903	A	138.962	A	32.6214	A	53.5356	A	46.5048	A	108.317	A	97.4521	A	86.5091	LOC_Os11g46240.1	retrotransposon protein, putative, unclassified, expressed
Os004781_01	A	95.4432	A	82.184	A	88.3623	A	142.573	A	115.646	A	82.4151	A	87.4775	A	98.6999	P	165.398	A	36.5524	A	36.8469	A	60.5331	A	4.64943	A	-2.48738	A	4.20112	A	57.5858	A	64.7392	A	57.0009	LOC_Os11g03130.1	E2F-related protein, putative, expressed
Os004782_01	A	43.4546	A	39.3242	A	34.3655	P	158.665	P	175.68	P	160.451	A	68.4387	A	94.2533	P	178.335	A	67.9185	A	88.7906	A	84.5117	A	56.5294	A	34.563	A	4.0645	A	68.6481	A	68.0462	A	71.9927	LOC_Os08g41900.1	expressed protein
Os004794_01	A	49.2583	A	39.7415	A	54.1972	A	146.696	P	164.436	P	149.746	A	66.8456	A	98.9026	A	133.383	A	50.1429	A	55.1208	A	54.7921	A	37.0701	A	46.3198	A	42.7314	A	66.2122	A	119.498	A	181.123	-	-
Os004804_01	P	160.724	A	114.711	A	109.484	A	123.92	P	133.046	A	91.2301	A	136.718	P	214.097	A	158.418	A	44.4396	A	40.4637	A	47.8529	A	-5.91335	A	8.40422	A	9.48293	A	59.5777	A	72.5167	A	70.3357	LOC_Os03g20580.1	expressed protein
Os004810_01	P	505.735	P	474.852	P	512.604	P	789.946	P	762.162	P	731.264	P	725.57	P	579.013	P	617.644	P	1024.33	P	1023.96	P	837.967	P	769.252	P	766.921	P	869.459	P	473.747	P	651.025	P	690.884	LOC_Os08g33210.1	expressed protein
Os004816_01	A	47.2327	A	36.1317	A	46.2206	P	187.069	P	193.497	A	91.6201	A	33.7064	A	83.1687	A	120.985	A	114.232	A	205.437	A	36.8551	A	-1.71354	A	4.37153	A	-5.63075	A	60.7344	A	65.0616	A	55.0865	-	-
Os004822_01	A	120.816	A	84.0069	A	60.6309	P	186.591	A	129.638	A	90.4552	A	138.509	A	128.945	P	182.019	A	43.4689	A	58.982	A	64.9401	A	-2.27042	A	6.55657	A	-1.44877	A	51.523	A	81.171	A	59.4408	LOC_Os06g08540.2	formin-like protein 13, putative, expressed
Os004826_01	P	337.179	P	282.338	P	333.678	P	1107.23	P	980.189	P	718.882	P	663.514	P	663.639	P	700.038	P	675.527	P	666.727	P	711.392	P	516.746	P	469.169	P	358.9	P	707.546	P	400.432	P	943.156	LOC_Os02g13890.1	FYVE zinc finger domain containing protein, expressed
Os004842_01	A	91.3346	A	72.9889	A	44.639	P	311.471	P	215.084	P	164.236	A	160.792	P	211.918	P	228.694	A	52.0597	A	59.3402	A	59.9993	A	36.7726	A	123.442	A	156.844	A	84.5371	A	89.1923	A	65.1503	-	-
Os004843_01	A	75.5387	A	66.8376	A	69.5823	P	403.455	P	303.056	P	207.588	P	307.122	P	323.148	P	324.58	P	202.102	P	187.047	P	179.904	P	404.162	P	247.432	P	140.134	A	94.0471	P	112.089	P	149.816	LOC_Os06g49300.1	glycosyltransferase protein, putative, expressed
Os004844_02	A	165.409	A	212.634	A	114.516	P	158.788	P	176.834	A	132.968	A	122.927	A	134.596	P	207.082	A	31.928	A	33.4041	A	38.022	A	-17.558	A	-8.83528	A	-3.90878	A	55.0738	A	79.6642	A	73.6268	-	-
Os004855_01	P	23542	P	21197.7	P	29695.2	P	17242	P	17048	P	13663.3	P	15668.6	P	14692.1	P	19150	P	24480.8	P	24732.4	P	26482.9	P	23204.9	P	23229.7	P	21424.3	P	24608.4	P	24803	P	25165.8	LOC_Os08g29760.1	membrane protein, putative, expressed
Os004857_01	A	66.2297	A	57.8608	A	66.9993	P	204.394	P	189.154	P	158.539	A	92.5011	A	110.462	A	149.096	A	84.9294	A	92.8457	A	101.177	A	46.2074	A	50.932	A	33.8555	A	88.5478	A	116.966	A	105.5	LOC_Os02g58250.1	expressed protein
Os004859_01	P	6615.97	P	6670.81	P	7731.91	P	4692.36	P	4504.56	P	4395.93	P	4033.24	P	4146.5	P	4912.74	P	12006.3	P	10630.8	P	10667.4	P	15479.6	P	15558.8	P	12516.5	P	8330.85	P	8822.51	P	10692.9	LOC_Os01g41280.1	OsFBD4 - F-box and FBD domain containing protein, expressed
Os004860_01	A	115.802	A	154.108	A	51.9731	A	140.918	A	107.647	A	58.6571	A	56.5401	A	92.0848	A	131.99	A	37.7782	A	39.14	A	41.1139	A	4.5144	A	8.80979	A	13.4785	A	58.9247	A	65.6021	A	63.4352	LOC_Os10g06740.1	receptor-like protein kinase precursor, putative, expressed
Os004861_01	A	80.8757	A	54.652	A	52.7315	P	226.669	A	102.115	A	69.8927	A	39.8577	A	102.015	P	163.442	A	24.4401	A	33.428	A	57.3643	A	0.21265	A	-0.678294	A	8.8356	A	51.4806	A	64.5279	A	54.5738	LOC_Os07g40160.1	expressed protein
Os004865_01	P	4167.38	P	2373.17	P	1024.88	P	362.295	P	338.964	P	304.931	P	1867.47	P	1444.86	P	1122.93	P	141.046	P	165.852	A	106.911	A	178.13	A	140.749	A	92.979	P	182.438	P	160.555	P	163.893	LOC_Os07g36460.1	helix-loop-helix DNA-binding domain containing protein, expressed
Os004868_01	A	88.7895	A	125.07	P	157.552	P	231.464	P	206.382	P	173.522	P	144.511	P	159.444	P	186.791	A	113.863	P	141.247	P	141.905	A	84.2269	A	87.2624	A	62.6772	P	120.917	P	135.851	P	163.967	LOC_Os04g38010.1	transporter family protein, putative
Os004873_01	A	46.9848	A	54.673	A	51.1184	P	163.881	P	149.969	P	141.261	A	122.545	P	167.593	P	202.104	A	80.9271	A	95.5452	P	123.624	A	52.01	A	52.7611	A	37.6518	P	119.235	P	142.46	P	137.809	LOC_Os04g04010.1	expressed protein
Os004875_01	P	647.444	P	488.695	A	139.333	P	188.921	P	189.328	P	148.728	P	690.361	A	390.436	A	335.727	A	70.2576	A	78.5105	A	79.6977	A	13.6956	A	13.8637	A	3.82255	A	63.8593	A	81.8209	A	61.621	LOC_Os04g02730.1	tRNA-dihydrouridine synthase 3-like, putative, expressed
Os004882_01	A	73.8277	A	90.6529	A	68.3498	P	399.049	P	447.229	P	535.596	P	197.431	P	226.857	P	229.533	P	112.968	P	174.948	A	142.135	A	75.1832	A	87.027	A	119.964	P	191.195	P	151.206	P	170.379	LOC_Os05g10770.1	transcription factor jumonji, putative, expressed
Os004890_01	P	127.067	A	110.036	A	104.393	P	176.754	P	163.285	P	132.152	A	64.6627	A	102.767	P	169.382	A	67.1385	A	65.4174	A	70.7273	A	13.4093	A	17.2867	A	13.3065	A	70.5046	A	89.2099	A	94.0848	LOC_Os05g16240.1	expressed protein
Os004905_01	A	112.116	A	99.3336	A	65.3129	P	314.341	P	267.38	P	180.078	P	127.043	P	210.11	P	285.154	P	129.996	A	98.9571	A	65.6373	A	85.6726	A	61.5407	A	28.5364	A	86.0322	P	142.252	P	183.973	LOC_Os01g35030.1	MDR-like ABC transporter, putative, expressed
Os004908_01	P	16105.3	P	14255.7	P	11091.1	P	7271.12	P	5880.12	P	5425.17	P	8218.75	P	8237.42	P	7913.15	P	12213.8	P	10638.8	P	9679.91	P	8701.73	P	7961.91	P	6701.08	P	9861.05	P	9711.19	P	8273.5	LOC_Os07g45620.1	retrotransposon protein, putative, Ty3-gypsy subclass
Os004910_01	P	1627.68	P	1949.47	P	2667.36	P	1243.37	P	1023	P	858.605	P	859.992	P	1162.01	P	1411.33	P	1252.97	P	1195.71	P	1256.09	P	1897.37	P	1872.01	P	1873.87	P	1568	P	1644.53	P	2020.49	LOC_Os04g41280.1	ankyrin repeat domain containing protein, expressed
Os004911_01	A	76.8691	A	48.3334	A	62.7464	P	195.254	P	212.757	P	139.844	A	69.115	A	123.995	P	202.296	A	46.9063	A	46.7848	A	49.4516	A	25.8768	A	35.3385	A	21.5628	A	68.0307	A	89.0992	A	94.0722	LOC_Os06g38970.1	expressed protein
Os004916_02	A	143.995	P	231.557	P	291.193	P	221.745	P	227.406	P	191.969	P	140.051	P	175.197	P	238.947	P	157.154	P	182.67	P	226.84	P	403.591	P	276.591	P	181.306	P	193.808	P	225.58	P	251.942	-	-
Os004928_01	P	168.041	P	153.386	A	108.752	P	218.815	P	194.857	P	181.84	A	97.2595	A	156.194	P	218.658	A	57.0127	A	55.1725	A	69.9189	A	31.3388	A	40.8747	A	17.4565	A	65.5648	A	73.2478	A	95.5991	LOC_Os11g37950.1	WIP3 - Wound-induced protein precursor, expressed
Os004929_01	P	668.852	P	731.095	P	517.683	P	838.13	P	1074.58	P	830.658	P	466.187	P	519.572	P	382.537	P	493.505	P	572.752	P	489.454	P	697.036	P	595.005	P	431.406	P	423.984	P	339.938	P	413.415	LOC_Os07g40150.1	expressed protein
Os004940_01	A	68.3202	A	50.8278	A	71.1979	P	207.2	P	169.782	P	142.142	A	89.3827	A	103.745	A	158.739	A	41.3137	A	55.8513	A	76.6196	A	24.6557	A	19.4901	A	31.721	A	68.3887	A	86.5187	A	59.3272	LOC_Os06g45800.1	PAP/25A associated domain containing protein, putative, expressed
Os004942_01	P	4694.05	P	5561.04	P	7223.47	P	6239.87	P	5613.49	P	5486.13	P	6488.96	P	6446.21	P	5659.73	P	9078.16	P	10178.2	P	10187.3	P	10253.9	P	9656.04	P	8848.27	P	9681.99	P	10223.4	P	9248.89	-	-
Os004951_01	P	3498.18	P	4253.59	P	4700.2	P	1357.46	P	1370.73	P	1327.76	P	1294.17	P	1341.31	P	1690.27	P	2235.57	P	2167.43	P	2219.05	P	3554.01	P	3379.61	P	3265.59	P	2405.53	P	2408.78	P	2641.75	LOC_Os01g08130.1	phototropic-responsive NPH3 family protein, putative, expressed
Os004960_01	P	3040.89	P	2543.68	P	2879.87	P	3826.25	P	4125.7	P	4942.52	P	5710.46	P	4502.63	P	3781.47	P	6029.7	P	7062.5	P	7795.91	P	5263.74	P	5764.72	P	5890.58	P	5617.53	P	4919.79	P	4577.36	-	-
Os004962_01	A	36.8282	A	32.3607	A	52.0319	A	125.665	A	106.585	A	101.152	A	50.2573	A	86.2579	A	127.456	A	47.3432	A	51.3751	A	65.7291	A	-1.95372	A	14.6346	A	16.9654	A	63.0355	A	72.5019	A	63.1784	LOC_Os01g67630.1	peptide transporter PTR2, putative, expressed
Os004963_01	A	61.9927	A	51.4351	A	53.2826	P	182.883	P	208.198	P	161.21	P	135.326	P	174.964	P	219.961	A	90.0769	A	91.7966	A	117.357	A	108.673	A	67.2975	A	36.3739	A	105.092	A	102.204	P	115.072	LOC_Os04g43550.1	MazG nucleotide pyrophosphohydrolase domain containing protein, expressed
Os004964_01	A	80.7087	A	96.7553	A	89.1367	P	182.765	P	173.947	P	127.933	A	86.9946	A	114.117	A	139.434	A	44.5457	A	56.4091	A	66.0749	A	42.7595	A	39.1223	A	37.9086	A	74.0282	A	80.9953	A	77.8049	LOC_Os09g36650.1	expressed protein
Os004966_01	A	99.4018	A	113.664	A	143.068	P	182.059	P	170.186	P	183.097	A	97.5134	P	150.121	P	151.039	P	173.614	P	164.59	P	169.246	P	144.912	P	130.855	A	76.3944	P	158.971	P	145.899	P	146.456	-	-
Os004975_01	P	1018.23	P	1182.25	P	1421.28	P	755.704	P	628.669	P	658.576	P	602.325	P	775.703	P	859.353	P	1027.88	P	1255.38	P	1202.75	P	1496.99	P	1440.78	P	1378.17	P	1310.51	P	1368.96	P	1207.17	LOC_Os06g14280.1	cysteine-rich repeat secretory protein precursor, putative, expressed
Os004990_02	P	17033.8	P	15625	P	16161.4	P	6500.8	P	7209.19	P	6169.38	P	8204.49	P	5883.61	P	6099.81	P	12833.7	P	13322.3	P	12891.4	P	9865.98	P	9866.4	P	9606.11	P	14276.4	P	13137.6	P	10937.5	-	-
Os004992_01	P	594.625	P	441.554	P	162.47	P	237.561	P	208.664	P	221.947	A	238.417	P	346.816	P	355.424	P	137.55	A	112.582	P	123.105	A	90.036	A	80.511	A	72.2256	P	142.58	P	161.277	P	183.679	LOC_Os05g39870.1	CAMK_KIN1/SNF1/Nim1_like.24 - CAMK includes calcium/calmodulin depedent protein kinases
Os004999_01	A	81.894	A	77.9351	A	71.43	P	210.956	P	167.346	A	110.505	A	57.5859	A	105.678	P	163.875	A	48.9573	A	59.5438	A	60.8465	A	18.0664	A	24.5498	A	18.9107	A	69.5429	A	77.7986	A	72.4142	LOC_Os07g31500.1	leucine-rich repeat receptor protein kinase EXS precursor, putative, expressed
Os005010_02	P	46310.2	P	49064	P	54259.2	P	55239.2	P	58971.5	P	62571.6	P	62229.3	P	60194.2	P	62324.2	P	64216.2	P	61966.1	P	55842.7	P	55442.1	P	56157.2	P	53678.5	P	61226.1	P	62041.8	P	64036.3	-	-
Os005019_01	A	39.8445	A	29.5571	A	57.422	A	112.251	A	118.545	A	99.2938	A	34.6949	A	86.4231	A	147.041	A	37.4843	A	34.7395	A	37.1189	A	7.62233	A	18.9947	A	13.5925	A	34.0703	A	59.7246	A	57.3566	LOC_Os08g43730.1	DUF630/DUF632 domains containing protein, putative, expressed
Os005027_01	A	61.3511	A	53.8726	A	54.037	P	206.705	P	155.251	P	138.647	A	70.6035	P	121.271	A	145.361	A	69.3493	A	88.8954	A	92.8383	A	45.8434	A	40.0257	A	24.96	A	71.7006	A	100.049	A	88.3808	-	-
Os005028_01	A	282.081	A	163.256	A	70.8378	P	280.432	P	221.067	P	177.456	P	506.008	P	378.642	P	373.588	P	206.567	P	219.572	P	209.181	A	25.9377	A	22.527	A	21.0882	A	79.5677	P	163.373	P	168.572	LOC_Os07g09690.1	galactosyltransferase family protein, putative, expressed
Os005048_01	A	86.015	A	104.481	P	142.207	P	217.653	P	175.006	P	161.292	A	96.1597	P	154.793	P	172.647	P	129.623	P	124.305	P	147.796	P	179.715	P	184.292	A	135.078	P	177.501	P	157.814	P	178.945	LOC_Os02g08070.1	OsSPL5 - SBP-box gene family member, expressed
Os005050_01	A	73.8029	A	57.1211	A	89.2749	P	325.257	P	246.814	P	232.559	A	122.73	P	212.506	P	303.456	A	49.9027	A	81.2022	P	115.691	A	30.6606	A	36.9309	A	48.8252	A	105.51	A	113.418	P	133.397	LOC_Os01g68680.1	tetratricopeptide repeat domain containing protein, expressed
Os005054_01	P	370.405	P	384.894	P	411.164	P	427.713	P	348.3	P	299.685	P	304.32	P	343.025	P	431.967	P	199.627	P	226.429	P	220.355	P	318.683	P	332.072	P	321.136	P	223.309	P	241.701	P	237.019	LOC_Os03g30780.2	expressed protein
[truncated: 35,306 more rows]

## Sheet: Table S3
Table S3. DGs in LY2163 hybrid combination at Fw stage
[truncated: 583 more rows]

## Sheet: Table S4
Table S4. DGs in LY2163 hybrid combination at Fi stage
[truncated: 643 more rows]

[truncated: 7 more sheets: Table S5, Table S6, Table S7, Table S8, Table S9, Table S10, Table S11]
